# Supplementary material for: A proteomics-based methodology to investigate the protein corona effect for targeted drug delivery
Source: Royal Society of Chemistry journal article supplement (doi:10.1039/c4mb00292j), 2014-08-05
Supplement: c4mb00292j1.pdf [file c4mb00292j1.pdf]

**Table S1.** Full list of the proteins identified in the corona of PEGylated multicomponent liposome-human plasma complexes as determined by nano liquid chromatography tandem mass spectrometry. The name, accession number, molecular weight, relative protein abundance (RPA) and the relative standard deviation (s.d.) are reported.

|    | Identified Protein                                                              | Accession Number | Molecular Weight | RPA  | s.d. |
|----|---------------------------------------------------------------------------------|------------------|------------------|------|------|
| 1  | Ig kappa chain C region OS=Homo sapiens GN=IGKC PE=1 SV=1                       | IGKC_HUMAN       | 12               | 5.79 | 0.48 |
| 2  | Complement C3 OS=Homo sapiens GN=C3 PE=1 SV=2                                   | CO3_HUMAN        | 187              | 5.21 | 0.30 |
| 3  | Ig lambda-2 chain C regions OS=Homo sapiens GN=IGLC2 PE=1 SV=1                  | LAC2_HUMAN       | 11               | 3.42 | 0.18 |
| 4  | Apolipoprotein C-III OS=Homo sapiens GN=APOC3 PE=1 SV=1                         | APOC3_HUMAN      | 11               | 3.14 | 0.14 |
| 5  | Complement C1q subcomponent subunit A OS=Homo sapiens GN=C1QA PE=1 SV=2         | C1QA_HUMAN       | 26               | 2.58 | 0.39 |
| 6  | Serum albumin OS=Homo sapiens GN=ALB PE=1 SV=2                                  | ALBU_HUMAN       | 69               | 2.46 | 0.30 |
| 7  | Ig mu chain C region OS=Homo sapiens GN=IGHM PE=1 SV=3                          | IGHM_HUMAN       | 49               | 2.40 | 0.10 |
| 8  | Apolipoprotein E OS=Homo sapiens GN=APOE PE=1 SV=1                              | APOE_HUMAN       | 36               | 1.95 | 0.15 |
| 9  | Complement C1q subcomponent subunit B OS=Homo sapiens GN=C1QB PE=1 SV=3         | C1QB_HUMAN       | 27               | 1.79 | 0.10 |
| 10 | Complement C4-B OS=Homo sapiens GN=C4B PE=1 SV=1                                | CO4B_HUMAN       | 193              | 1.69 | 0.04 |
| 11 | Apolipoprotein A-I OS=Homo sapiens GN=APOA1 PE=1 SV=1                           | APOA1_HUMAN      | 31               | 1.66 | 0.16 |
| 12 | Keratin, type II cytoskeletal 1 OS=Homo sapiens GN=KRT1 PE=1 SV=6               | K2C1_HUMAN       | 66               | 1.47 | 0.05 |
| 13 | Apolipoprotein A-II OS=Homo sapiens GN=APOA2 PE=1 SV=1                          | APOA2_HUMAN      | 11               | 1.47 | 0.07 |
| 14 | Apolipoprotein C-II OS=Homo sapiens GN=APOC2 PE=1 SV=1                          | APOC2_HUMAN      | 11               | 1.31 | 0.25 |
| 15 | Alpha-1-antitrypsin OS=Homo sapiens GN=SERPINA1 PE=1 SV=3                       | A1AT_HUMAN       | 47               | 1.22 | 0.09 |
| 16 | Hemoglobin subunit alpha OS=Homo sapiens GN=HBA1 PE=1 SV=2                      | HBA_HUMAN        | 15               | 1.22 | 0.21 |
| 17 | Keratin, type I cytoskeletal 10 OS=Homo sapiens GN=KRT10 PE=1 SV=6              | K1C10_HUMAN      | 59               | 1.22 | 0.07 |
| 18 | Hemoglobin subunit beta OS=Homo sapiens GN=HBB PE=1 SV=2                        | HBB_HUMAN        | 16               | 1.19 | 0.05 |
| 19 | Keratin, type I cytoskeletal 9 OS=Homo sapiens GN=KRT9 PE=1 SV=3                | K1C9_HUMAN       | 62               | 1.17 | 0.02 |
| 20 | Complement C1q subcomponent subunit C OS=Homo sapiens GN=C1QC PE=1 SV=3         | C1QC_HUMAN       | 26               | 1.17 | 0.06 |
| 21 | Apolipoprotein A-IV OS=Homo sapiens GN=APOA4 PE=1 SV=3                          | APOA4_HUMAN      | 45               | 1.17 | 0.14 |
| 22 | Ig gamma-1 chain C region OS=Homo sapiens GN=IGHG1 PE=1 SV=1                    | IGHG1_HUMAN      | 36               | 1.12 | 0.08 |
| 23 | Ig kappa chain V-III region HAH OS=Homo sapiens PE=2 SV=1                       | KV312_HUMAN (+1) | 14               | 1.10 | 0.08 |
| 24 | Keratin, type II cytoskeletal 2 epidermal OS=Homo sapiens GN=KRT2 PE=1 SV=2     | K22E_HUMAN       | 65               | 1.08 | 0.04 |
| 25 | Fibrinogen beta chain OS=Homo sapiens GN=FGB PE=1 SV=2                          | FIBB_HUMAN       | 56               | 1.07 | 0.02 |
| 26 | Ig gamma-2 chain C region OS=Homo sapiens GN=IGHG2 PE=1 SV=2                    | IGHG2_HUMAN      | 36               | 1.02 | 0.16 |
| 27 | Actin, cytoplasmic 1 OS=Homo sapiens GN=ACTB PE=1 SV=1                          | ACTB_HUMAN       | 42               | 0.99 | 0.04 |
| 28 | Fibrinogen gamma chain OS=Homo sapiens GN=FGG PE=1 SV=3                         | FIBG_HUMAN       | 52               | 0.98 | 0.08 |
| 29 | C4b-binding protein alpha chain OS=Homo sapiens GN=C4BPA PE=1 SV=2              | C4BPA_HUMAN      | 67               | 0.96 | 0.06 |
| 30 | Vitronectin OS=Homo sapiens GN=VTN PE=1 SV=1                                    | VTNC_HUMAN       | 54               | 0.90 | 0.03 |
| 31 | Thymosin beta-4 OS=Homo sapiens GN=TMSB4X PE=1 SV=2                             | TYB4_HUMAN       | 5                | 0.89 | 0.15 |
| 32 | Clusterin OS=Homo sapiens GN=CLU PE=1 SV=1                                      | CLUS_HUMAN       | 52               | 0.84 | 0.02 |
| 33 | Fibrinogen alpha chain OS=Homo sapiens GN=FGA PE=1 SV=2                         | FIBA_HUMAN       | 95               | 0.83 | 0.12 |
| 34 | Ig kappa chain V-IV region (Fragment) OS=Homo sapiens GN=IGKV4-1 PE=4 SV=1      | KV401_HUMAN (+1) | 13               | 0.82 | 0.06 |
| 35 | Haptoglobin-related protein OS=Homo sapiens GN=HPR PE=1 SV=2                    | HPTR_HUMAN       | 39               | 0.81 | 0.01 |
| 36 | Apolipoprotein B-100 OS=Homo sapiens GN=APOB PE=1 SV=2                          | APOB_HUMAN       | 516              | 0.81 | 0.02 |
| 37 | Immunoglobulin lambda-like polypeptide 5 OS=Homo sapiens GN=IGLL5 PE=2 SV=2     | IGLL5_HUMAN      | 23               | 0.80 | 0.08 |
| 38 | Complement factor H OS=Homo sapiens GN=CFH PE=1 SV=4                            | CFAH_HUMAN       | 139              | 0.79 | 0.05 |
| 39 | Ig heavy chain V-III region GAL OS=Homo sapiens PE=1 SV=1                       | HV320_HUMAN      | 13               | 0.78 | 0.10 |
| 40 | Inter-alpha-trypsin inhibitor heavy chain H2 OS=Homo sapiens GN=ITIH2 PE=1 SV=2 | ITIH2_HUMAN      | 106              | 0.77 | 0.07 |
| 41 | Apolipoprotein C-I OS=Homo sapiens GN=APOC1 PE=1 SV=1                           | APOC1_HUMAN      | 9                | 0.75 | 0.16 |
| 42 | Haptoglobin OS=Homo sapiens GN=HP PE=1 SV=1                                     | HPT_HUMAN        | 45               | 0.69 | 0.08 |
| 43 | Vitamin K-dependent protein S OS=Homo sapiens GN=PROS1 PE=1 SV=1                | PROS_HUMAN       | 75               | 0.68 | 0.04 |
| 44 | Transthyretin OS=Homo sapiens GN=TTR PE=1 SV=1                                  | TTHY_HUMAN       | 16               | 0.66 | 0.05 |
| 45 | Serum amyloid A-4 protein OS=Homo sapiens GN=SAA4 PE=1 SV=2                     | SAA4_HUMAN       | 15               | 0.65 | 0.07 |
| 46 | Complement factor H-related protein 1 OS=Homo sapiens GN=CFHR1 PE=1 SV=2        | FHR1_HUMAN       | 38               | 0.65 | 0.24 |
| 47 | C-reactive protein OS=Homo sapiens GN=CRP PE=1 SV=1                             | CRP_HUMAN        | 25               | 0.65 | 0.06 |

|    |                                                                                 |             |     |      |      |
|----|---------------------------------------------------------------------------------|-------------|-----|------|------|
| 48 | Complement C5 OS=Homo sapiens GN=C5 PE=1 SV=4                                   | CO5_HUMAN   | 188 | 0.64 | 0.02 |
| 49 | Complement component C9 OS=Homo sapiens GN=C9 PE=1 SV=2                         | CO9_HUMAN   | 63  | 0.62 | 0.01 |
| 50 | Serotransferrin OS=Homo sapiens GN=TF PE=1 SV=3                                 | TRFE_HUMAN  | 77  | 0.57 | 0.01 |
| 51 | Apolipoprotein C-IV OS=Homo sapiens GN=APOC4 PE=1 SV=1                          | APOC4_HUMAN | 15  | 0.55 | 0.11 |
| 52 | Inter-alpha-trypsin inhibitor heavy chain H1 OS=Homo sapiens GN=ITIH1 PE=1 SV=3 | ITIH1_HUMAN | 101 | 0.55 | 0.02 |
| 53 | Complement component C8 gamma chain OS=Homo sapiens GN=C8G PE=1 SV=3            | CO8G_HUMAN  | 22  | 0.53 | 0.03 |
| 54 | Ig heavy chain V-III region BRO OS=Homo sapiens PE=1 SV=1                       | HV305_HUMAN | 13  | 0.53 | 0.22 |
| 55 | 14-3-3 protein zeta/delta OS=Homo sapiens GN=YWHAZ PE=1 SV=1                    | 1433Z_HUMAN | 28  | 0.51 | 0.02 |
| 56 | Galectin-3-binding protein OS=Homo sapiens GN=LGALS3BP PE=1 SV=1                | LG3BP_HUMAN | 65  | 0.50 | 0.05 |
| 57 | Myosin light polypeptide 6 OS=Homo sapiens GN=MYL6 PE=1 SV=2                    | MYL6_HUMAN  | 17  | 0.50 | 0.10 |
| 58 | Apolipoprotein D OS=Homo sapiens GN=APOD PE=1 SV=1                              | APOD_HUMAN  | 21  | 0.49 | 0.08 |
| 59 | Hyaluronan-binding protein 2 OS=Homo sapiens GN=HMCP2 PE=1 SV=1                 | HMCP2_HUMAN | 63  | 0.49 | 0.05 |
| 60 | Ig heavy chain V-III region BUT OS=Homo sapiens PE=1 SV=1                       | HV306_HUMAN | 12  | 0.47 | 0.13 |
| 61 | Keratin, type I cytoskeletal 16 OS=Homo sapiens GN=KRT16 PE=1 SV=4              | K1C16_HUMAN | 51  | 0.46 | 0.07 |
| 62 | Keratin, type I cytoskeletal 14 OS=Homo sapiens GN=KRT14 PE=1 SV=4              | K1C14_HUMAN | 52  | 0.46 | 0.02 |
| 63 | Prothrombin OS=Homo sapiens GN=F2 PE=1 SV=2                                     | THRB_HUMAN  | 70  | 0.45 | 0.02 |
| 64 | Ig kappa chain V-I region HK102 (Fragment) OS=Homo sapiens GN=IGKV1-5 PE=4 SV=1 | KV110_HUMAN | 13  | 0.43 | 0.13 |
| 65 | Complement factor B OS=Homo sapiens GN=CFB PE=1 SV=2                            | CFMC_HUMAN  | 86  | 0.43 | 0.04 |
| 66 | Keratin, type II cytoskeletal 5 OS=Homo sapiens GN=KRT5 PE=1 SV=3               | K2C5_HUMAN  | 62  | 0.42 | 0.06 |
| 67 | Tropomyosin alpha-4 chain OS=Homo sapiens GN=TPM4 PE=1 SV=3                     | TPM4_HUMAN  | 29  | 0.41 | 0.06 |
| 68 | Serum paraoxonase/arylesterase 1 OS=Homo sapiens GN=PON1 PE=1 SV=3              | PON1_HUMAN  | 40  | 0.41 | 0.09 |
| 69 | Ig alpha-1 chain C region OS=Homo sapiens GN=IGHA1 PE=1 SV=2                    | IGHA1_HUMAN | 38  | 0.40 | 0.01 |
| 70 | Erythrocyte band 7 integral membrane protein OS=Homo sapiens GN=STOM PE=1 SV=3  | STOM_HUMAN  | 32  | 0.39 | 0.07 |
| 71 | Dermodin OS=Homo sapiens GN=DCD PE=1 SV=2                                       | DCD_HUMAN   | 11  | 0.38 | 0.11 |
| 72 | Inter-alpha-trypsin inhibitor heavy chain H3 OS=Homo sapiens GN=ITIH3 PE=1 SV=2 | ITIH3_HUMAN | 100 | 0.38 | 0.02 |
| 73 | Plasma protease C1 inhibitor OS=Homo sapiens GN=SERPING1 PE=1 SV=2              | IC1_HUMAN   | 55  | 0.38 | 0.02 |
| 74 | Keratin, type II cytoskeletal 6A OS=Homo sapiens GN=KRT6A PE=1 SV=3             | K2C6A_HUMAN | 60  | 0.37 | 0.07 |
| 75 | Alpha-1-acid glycoprotein 1 OS=Homo sapiens GN=ORM1 PE=1 SV=1                   | A1AG1_HUMAN | 24  | 0.37 | 0.08 |
| 76 | Profilin-1 OS=Homo sapiens GN=PFN1 PE=1 SV=2                                    | PROF1_HUMAN | 15  | 0.36 | 0.06 |
| 77 | Immunoglobulin J chain OS=Homo sapiens GN=IGJ PE=1 SV=4                         | IGJ_HUMAN   | 18  | 0.33 | 0.09 |
| 78 | Complement C1s subcomponent OS=Homo sapiens GN=C1S PE=1 SV=1                    | C1S_HUMAN   | 77  | 0.32 | 0.07 |
| 79 | Alpha-2-macroglobulin OS=Homo sapiens GN=A2M PE=1 SV=3                          | A2MG_HUMAN  | 163 | 0.32 | 0.02 |
| 80 | Complement component C8 beta chain OS=Homo sapiens GN=C8B PE=1 SV=3             | CO8B_HUMAN  | 67  | 0.32 | 0.06 |
| 81 | Complement component C6 OS=Homo sapiens GN=C6 PE=1 SV=3                         | CO6_HUMAN   | 105 | 0.31 | 0.01 |
| 82 | Secreted phosphoprotein 24 OS=Homo sapiens GN=SPP2 PE=1 SV=1                    | SPP24_HUMAN | 24  | 0.30 | 0.03 |
| 83 | Peptidyl-prolyl cis-trans isomerase A OS=Homo sapiens GN=PPIA PE=1 SV=2         | PPIA_HUMAN  | 18  | 0.30 | 0.09 |
| 84 | Glyceraldehyde-3-phosphate dehydrogenase OS=Homo sapiens GN=GAPDH PE=1 SV=3     | G3P_HUMAN   | 36  | 0.30 | 0.08 |
| 85 | Ras-related protein Rap-1b OS=Homo sapiens GN=RAP1B PE=1 SV=1                   | RAP1B_HUMAN | 21  | 0.30 | 0.11 |
| 86 | Ig kappa chain V-I region WEA OS=Homo sapiens PE=1 SV=1                         | KV118_HUMAN | 12  | 0.28 | 0.49 |
| 87 | Ig heavy chain V-I region V35 OS=Homo sapiens PE=1 SV=1                         | HV103_HUMAN | 13  | 0.28 | 0.12 |
| 88 | Gelsolin OS=Homo sapiens GN=GSN PE=1 SV=1                                       | GELS_HUMAN  | 86  | 0.28 | 0.01 |
| 89 | Ig heavy chain V-III region TRO OS=Homo sapiens PE=1 SV=1                       | HV301_HUMAN | 13  | 0.27 | 0.32 |
| 90 | Complement component C7 OS=Homo sapiens GN=C7 PE=1 SV=2                         | CO7_HUMAN   | 94  | 0.27 | 0.02 |
| 91 | Inter-alpha-trypsin inhibitor heavy chain H4 OS=Homo sapiens GN=ITIH4 PE=1 SV=4 | ITIH4_HUMAN | 103 | 0.27 | 0.02 |
| 92 | Alpha-1-antichymotrypsin OS=Homo sapiens GN=SERPINA3 PE=1 SV=2                  | AACT_HUMAN  | 48  | 0.26 | 0.05 |
| 93 | Integrin alpha-11b OS=Homo sapiens GN=ITGA2B PE=1 SV=3                          | ITA2B_HUMAN | 113 | 0.26 | 0.03 |
| 94 | Ig gamma-3 chain C region OS=Homo sapiens GN=IGHG3 PE=1 SV=2                    | IGHG3_HUMAN | 41  | 0.26 | 0.03 |
| 95 | Ig lambda chain V-III region LOI OS=Homo sapiens PE=1 SV=1                      | LV302_HUMAN | 12  | 0.25 | 0.05 |

|     |                                                                                             |                  |     |      |      |
|-----|---------------------------------------------------------------------------------------------|------------------|-----|------|------|
| 96  | Intelectin-1 OS=Homo sapiens GN=ITLN1 PE=1 SV=1                                             | ITLN1_HUMAN      | 35  | 0.25 | 0.03 |
| 97  | Ig lambda chain V-I region WAH OS=Homo sapiens PE=1 SV=1                                    | LV106_HUMAN      | 12  | 0.24 | 0.12 |
| 98  | Ig lambda chain V region 4A OS=Homo sapiens PE=4 SV=1                                       | LV001_HUMAN      | 12  | 0.24 | 0.21 |
| 99  | Myosin-9 OS=Homo sapiens GN=MYH9 PE=1 SV=4                                                  | MYH9_HUMAN       | 227 | 0.24 | 0.01 |
| 100 | Histidine-rich glycoprotein OS=Homo sapiens GN=HRG PE=1 SV=1                                | HRG_HUMAN        | 60  | 0.24 | 0.03 |
| 101 | Talin-1 OS=Homo sapiens GN=TLN1 PE=1 SV=3                                                   | TLN1_HUMAN       | 270 | 0.24 | 0.02 |
| 102 | Ig kappa chain V-III region VG (Fragment) OS=Homo sapiens PE=1 SV=1                         | KV309_HUMAN      | 13  | 0.24 | 0.14 |
| 103 | HLA class I histocompatibility antigen, B-35 alpha chain OS=Homo sapiens GN=HLA-B PE=1 SV=1 | 1B35_HUMAN (+1)  | 40  | 0.22 | 0.04 |
| 104 | SH3 domain-binding glutamic acid-rich-like protein 3 OS=Homo sapiens GN=SH3BGL3 PE=1 SV=1   | SH3L3_HUMAN      | 10  | 0.22 | 0.11 |
| 105 | Filamin-A OS=Homo sapiens GN=FLNA PE=1 SV=4                                                 | FLNA_HUMAN       | 281 | 0.22 | 0.01 |
| 106 | Vitamin D-binding protein OS=Homo sapiens GN=GC PE=1 SV=1                                   | VTDB_HUMAN       | 53  | 0.22 | 0.03 |
| 107 | Kininogen-1 OS=Homo sapiens GN=KNG1 PE=1 SV=2                                               | KNG1_HUMAN       | 72  | 0.21 | 0.00 |
| 108 | Keratin, type I cytoskeletal 13 OS=Homo sapiens GN=KRT13 PE=1 SV=4                          | K1C13_HUMAN      | 50  | 0.21 | 0.07 |
| 109 | Alpha-2-antiplasmin OS=Homo sapiens GN=SERPINF2 PE=1 SV=3                                   | A2AP_HUMAN       | 55  | 0.21 | 0.03 |
| 110 | Complement component C8 alpha chain OS=Homo sapiens GN=C8A PE=1 SV=2                        | CO8A_HUMAN       | 65  | 0.20 | 0.03 |
| 111 | von Willebrand factor OS=Homo sapiens GN=VWF PE=1 SV=4                                      | VWF_HUMAN        | 309 | 0.20 | 0.01 |
| 112 | Lipopolysaccharide-binding protein OS=Homo sapiens GN=LBP PE=1 SV=3                         | LBP_HUMAN        | 53  | 0.20 | 0.05 |
| 113 | Apolipoprotein M OS=Homo sapiens GN=APOM PE=1 SV=2                                          | APOM_HUMAN       | 21  | 0.20 | 0.03 |
| 114 | HLA class I histocompatibility antigen, A-68 alpha chain OS=Homo sapiens GN=HLA-A PE=1 SV=4 | 1A68_HUMAN       | 41  | 0.20 | 0.00 |
| 115 | Angiotensinogen OS=Homo sapiens GN=AGT PE=1 SV=1                                            | ANGT_HUMAN       | 53  | 0.20 | 0.01 |
| 116 | Moesin OS=Homo sapiens GN=MSN PE=1 SV=3                                                     | MOES_HUMAN       | 68  | 0.20 | 0.01 |
| 117 | Fermitin family homolog 3 OS=Homo sapiens GN=FERMT3 PE=1 SV=1                               | URP2_HUMAN       | 76  | 0.19 | 0.02 |
| 118 | Apolipoprotein L1 OS=Homo sapiens GN=APOL1 PE=1 SV=5                                        | APOL1_HUMAN      | 44  | 0.19 | 0.02 |
| 119 | Integrin beta-3 OS=Homo sapiens GN=ITGB3 PE=1 SV=2                                          | ITB3_HUMAN       | 87  | 0.19 | 0.02 |
| 120 | Ceruloplasmin OS=Homo sapiens GN=CP PE=1 SV=1                                               | CERU_HUMAN       | 122 | 0.19 | 0.02 |
| 121 | Calmodulin OS=Homo sapiens GN=CALM1 PE=1 SV=2                                               | CALM_HUMAN       | 17  | 0.17 | 0.06 |
| 122 | Tropomyosin alpha-3 chain OS=Homo sapiens GN=TPM3 PE=1 SV=1                                 | TPM3_HUMAN       | 33  | 0.17 | 0.01 |
| 123 | Tubulin alpha-1B chain OS=Homo sapiens GN=TUBA1B PE=1 SV=1                                  | TBA1B_HUMAN (+1) | 50  | 0.17 | 0.05 |
| 124 | Protein S100-A9 OS=Homo sapiens GN=S100A9 PE=1 SV=1                                         | S10A9_HUMAN      | 13  | 0.17 | 0.07 |
| 125 | Serum amyloid A-1 protein OS=Homo sapiens GN=AAA1 PE=1 SV=1                                 | SAA1_HUMAN       | 14  | 0.17 | 0.16 |
| 126 | 14-3-3 protein eta OS=Homo sapiens GN=YWHAH PE=1 SV=4                                       | 1433F_HUMAN      | 28  | 0.16 | 0.03 |
| 127 | Apolipoprotein F OS=Homo sapiens GN=APOF PE=1 SV=2                                          | APOF_HUMAN       | 35  | 0.16 | 0.02 |
| 128 | Vitamin K-dependent protein Z OS=Homo sapiens GN=PROZ PE=1 SV=2                             | PROZ_HUMAN       | 45  | 0.16 | 0.06 |
| 129 | Alpha-2-HS-glycoprotein OS=Homo sapiens GN=AHSG PE=1 SV=1                                   | FETUA_HUMAN      | 39  | 0.16 | 0.01 |
| 130 | Ig heavy chain V-III region WEA OS=Homo sapiens PE=1 SV=1                                   | HV302_HUMAN      | 12  | 0.16 | 0.27 |
| 131 | Tubulin beta-1 chain OS=Homo sapiens GN=TUBB1 PE=1 SV=1                                     | TBB1_HUMAN       | 50  | 0.16 | 0.01 |
| 132 | Serum amyloid P-component OS=Homo sapiens GN=APCS PE=1 SV=2                                 | SAMP_HUMAN       | 25  | 0.15 | 0.06 |
| 133 | Complement C1r subcomponent OS=Homo sapiens GN=C1R PE=1 SV=2                                | C1R_HUMAN        | 80  | 0.15 | 0.02 |
| 134 | Properdin OS=Homo sapiens GN=CFP PE=1 SV=2                                                  | PROP_HUMAN       | 51  | 0.15 | 0.01 |
| 135 | Annexin A2 OS=Homo sapiens GN=ANXA2 PE=1 SV=2                                               | ANXA2_HUMAN      | 39  | 0.15 | 0.02 |
| 136 | Platelet glycoprotein IX OS=Homo sapiens GN=GP9 PE=1 SV=3                                   | GPIX_HUMAN       | 19  | 0.15 | 0.02 |
| 137 | Vinculin OS=Homo sapiens GN=VCL PE=1 SV=4                                                   | VINC_HUMAN       | 124 | 0.14 | 0.02 |
| 138 | Hemopexin OS=Homo sapiens GN=HPX PE=1 SV=2                                                  | HEMO_HUMAN       | 52  | 0.14 | 0.03 |
| 139 | Lysozyme C OS=Homo sapiens GN=LYZ PE=1 SV=1                                                 | LYSC_HUMAN       | 17  | 0.14 | 0.03 |
| 140 | Heparin cofactor 2 OS=Homo sapiens GN=SERPIND1 PE=1 SV=3                                    | HEP2_HUMAN       | 57  | 0.14 | 0.03 |
| 141 | Thrombospondin-1 OS=Homo sapiens GN=THBS1 PE=1 SV=2                                         | TSP1_HUMAN       | 129 | 0.13 | 0.02 |
| 142 | Coagulation factor IX OS=Homo sapiens GN=F9 PE=1 SV=2                                       | FA9_HUMAN        | 52  | 0.13 | 0.02 |
| 143 | Cartilage oligomeric matrix protein OS=Homo sapiens GN=COMP PE=1 SV=2                       | COMP_HUMAN       | 83  | 0.13 | 0.03 |

|     |                                                                                                       |                  |     |      |      |
|-----|-------------------------------------------------------------------------------------------------------|------------------|-----|------|------|
| 144 | Ig kappa chain V-III region IARC/BL41 OS=Homo sapiens PE=1 SV=1                                       | KV311_HUMAN      | 14  | 0.13 | 0.12 |
| 145 | Vitamin K-dependent protein C OS=Homo sapiens GN=PROC PE=1 SV=1                                       | PROC_HUMAN       | 52  | 0.13 | 0.02 |
| 146 | Beta-parvin OS=Homo sapiens GN=PARVB PE=1 SV=1                                                        | PARVB_HUMAN      | 42  | 0.13 | 0.03 |
| 147 | Ig kappa chain V-II region RPMI 6410 OS=Homo sapiens PE=4 SV=1                                        | KV206_HUMAN      | 15  | 0.12 | 0.04 |
| 148 | Tubulin beta chain OS=Homo sapiens GN=TUBB PE=1 SV=2                                                  | TBB5_HUMAN       | 50  | 0.12 | 0.01 |
| 149 | Ras suppressor protein 1 OS=Homo sapiens GN=RSU1 PE=1 SV=3                                            | RSU1_HUMAN       | 32  | 0.12 | 0.05 |
| 150 | Actin, alpha cardiac muscle 1 OS=Homo sapiens GN=ACTC1 PE=1 SV=1                                      | ACTC_HUMAN       | 42  | 0.12 | 0.10 |
| 151 | Ig heavy chain V-III region CAM OS=Homo sapiens PE=1 SV=1                                             | HV307_HUMAN      | 14  | 0.12 | 0.12 |
| 152 | Band 3 anion transport protein OS=Homo sapiens GN=SLC4A1 PE=1 SV=3                                    | B3AT_HUMAN       | 102 | 0.12 | 0.02 |
| 153 | Integrin-linked protein kinase OS=Homo sapiens GN=ILK PE=1 SV=2                                       | ILK_HUMAN        | 51  | 0.11 | 0.01 |
| 154 | Antithrombin-III OS=Homo sapiens GN=SERPINC1 PE=1 SV=1                                                | ANT3_HUMAN       | 53  | 0.11 | 0.02 |
| 155 | Cathelicidin antimicrobial peptide OS=Homo sapiens GN=CAMP PE=1 SV=1                                  | CAMP_HUMAN       | 19  | 0.11 | 0.01 |
| 156 | Protein S100-A8 OS=Homo sapiens GN=S100A8 PE=1 SV=1                                                   | S10A8_HUMAN      | 11  | 0.11 | 0.19 |
| 157 | Complement factor I OS=Homo sapiens GN=CFI PE=1 SV=2                                                  | CFAI_HUMAN       | 66  | 0.11 | 0.02 |
| 158 | Platelet glycoprotein Ib alpha chain OS=Homo sapiens GN=GP1BA PE=1 SV=1                               | GP1BA_HUMAN      | 69  | 0.11 | 0.02 |
| 159 | 14-3-3 protein gamma OS=Homo sapiens GN=YWHAG PE=1 SV=2                                               | 1433G_HUMAN      | 28  | 0.10 | 0.12 |
| 160 | Myosin regulatory light chain 12A OS=Homo sapiens GN=MYL12A PE=1 SV=2                                 | ML12A_HUMAN (+1) | 20  | 0.10 | 0.10 |
| 161 | Alpha-actinin-1 OS=Homo sapiens GN=ACTN1 PE=1 SV=2                                                    | ACTN1_HUMAN      | 103 | 0.10 | 0.02 |
| 162 | Hornerin OS=Homo sapiens GN=HRNR PE=1 SV=2                                                            | HORN_HUMAN       | 282 | 0.10 | 0.01 |
| 163 | 14-3-3 protein epsilon OS=Homo sapiens GN=YWHAE PE=1 SV=1                                             | 1433E_HUMAN      | 29  | 0.10 | 0.04 |
| 164 | Ig lambda chain V-IV region Hil OS=Homo sapiens PE=1 SV=1                                             | LV403_HUMAN      | 12  | 0.10 | 0.17 |
| 165 | Transgelin-2 OS=Homo sapiens GN=TAGLN2 PE=1 SV=3                                                      | TAGL2_HUMAN      | 22  | 0.10 | 0.08 |
| 166 | Platelet glycoprotein 4 OS=Homo sapiens GN=CD36 PE=1 SV=2                                             | CD36_HUMAN       | 53  | 0.09 | 0.01 |
| 167 | Pigment epithelium-derived factor OS=Homo sapiens GN=SERPINF1 PE=1 SV=4                               | PEDF_HUMAN       | 46  | 0.09 | 0.01 |
| 168 | Ficolin-3 OS=Homo sapiens GN=FCN3 PE=1 SV=2                                                           | FCN3_HUMAN       | 33  | 0.09 | 0.03 |
| 169 | Plasminogen OS=Homo sapiens GN=PLG PE=1 SV=2                                                          | PLMN_HUMAN       | 91  | 0.09 | 0.01 |
| 170 | Heat shock cognate 71 protein OS=Homo sapiens GN=HSPA8 PE=1 SV=1                                      | HSP7C_HUMAN      | 71  | 0.09 | 0.03 |
| 171 | Guanine nucleotide-binding protein G(i) subunit alpha-2 OS=Homo sapiens GN=GNAI2 PE=1 SV=3            | GNAI2_HUMAN      | 40  | 0.08 | 0.02 |
| 172 | Protein Z-dependent protease inhibitor OS=Homo sapiens GN=SERPINA10 PE=1 SV=1                         | ZPI_HUMAN        | 51  | 0.08 | 0.03 |
| 173 | Ig kappa chain V-III region CLL OS=Homo sapiens PE=1 SV=2                                             | KV308_HUMAN      | 14  | 0.08 | 0.08 |
| 174 | Coagulation factor XIII A chain OS=Homo sapiens GN=F13A1 PE=1 SV=4                                    | F13A_HUMAN       | 83  | 0.08 | 0.03 |
| 175 | Alpha-1B-glycoprotein OS=Homo sapiens GN=A1BG PE=1 SV=4                                               | A1BG_HUMAN       | 54  | 0.08 | 0.01 |
| 176 | Keratin, type I cytoskeletal 17 OS=Homo sapiens GN=KRT17 PE=1 SV=2                                    | K1C17_HUMAN      | 48  | 0.07 | 0.13 |
| 177 | Ig lambda chain V-III region SH OS=Homo sapiens PE=1 SV=1                                             | LV301_HUMAN      | 11  | 0.07 | 0.12 |
| 178 | Thrombospondin-4 OS=Homo sapiens GN=THBS4 PE=1 SV=2                                                   | TSP4_HUMAN       | 106 | 0.07 | 0.01 |
| 179 | Transferrin receptor protein 1 OS=Homo sapiens GN=TFRC PE=1 SV=2                                      | TFR1_HUMAN       | 85  | 0.07 | 0.02 |
| 180 | Lumican OS=Homo sapiens GN=LUM PE=1 SV=2                                                              | LUM_HUMAN        | 38  | 0.07 | 0.02 |
| 181 | Serum deprivation-response protein OS=Homo sapiens GN=SDPR PE=1 SV=3                                  | SDPR_HUMAN       | 47  | 0.07 | 0.02 |
| 182 | Solute carrier family 2, facilitated glucose transporter member 3 OS=Homo sapiens GN=SLC2A3 PE=1 SV=1 | GTR3_HUMAN       | 54  | 0.07 | 0.03 |
| 183 | Ras-related protein RMC-10 OS=Homo sapiens GN=RMC10 PE=1 SV=1                                         | RMC10_HUMAN      | 23  | 0.07 | 0.08 |
| 184 | CD9 antigen OS=Homo sapiens GN=CD9 PE=1 SV=4                                                          | CD9_HUMAN        | 25  | 0.06 | 0.06 |
| 185 | Pyruvate kinase isozymes M1/M2 OS=Homo sapiens GN=PKM PE=1 SV=4                                       | KPYM_HUMAN       | 58  | 0.06 | 0.02 |
| 186 | Mannan-binding lectin serine protease 1 OS=Homo sapiens GN=MASP1 PE=1 SV=3                            | MASP1_HUMAN      | 79  | 0.06 | 0.00 |
| 187 | Apolipoprotein(a) OS=Homo sapiens GN=LPA PE=1 SV=1                                                    | APOA_HUMAN       | 501 | 0.06 | 0.01 |
| 188 | Fibronectin OS=Homo sapiens GN=FN1 PE=1 SV=4                                                          | FINC_HUMAN       | 263 | 0.06 | 0.01 |
| 189 | C4b-binding protein beta chain OS=Homo sapiens GN=C4BPB PE=1 SV=1                                     | C4BPB_HUMAN      | 28  | 0.05 | 0.03 |
| 190 | Coagulation factor V OS=Homo sapiens GN=F5 PE=1 SV=4                                                  | FA5_HUMAN        | 252 | 0.05 | 0.01 |
| 191 | Pleckstrin OS=Homo sapiens GN=PLEK PE=1 SV=3                                                          | PLEK_HUMAN       | 40  | 0.05 | 0.04 |

|     |                                                                                                       |                 |     |      |      |
|-----|-------------------------------------------------------------------------------------------------------|-----------------|-----|------|------|
| 192 | IgGfc-binding protein OS=Homo sapiens GN=FCGBP PE=1 SV=3                                              | FCGBP_HUMAN     | 572 | 0.05 | 0.00 |
| 193 | Integrin beta-1 OS=Homo sapiens GN=ITGB1 PE=1 SV=2                                                    | ITB1_HUMAN      | 88  | 0.05 | 0.01 |
| 194 | Complement C2 OS=Homo sapiens GN=C2 PE=1 SV=2                                                         | CO2_HUMAN       | 83  | 0.05 | 0.02 |
| 195 | N-acetylmuramoyl-L-alanine amidase OS=Homo sapiens GN=PGLYRP2 PE=1 SV=1                               | PGRP2_HUMAN     | 62  | 0.05 | 0.02 |
| 196 | Alpha-1-acid glycoprotein 2 OS=Homo sapiens GN=ORM2 PE=1 SV=2                                         | A1AG2_HUMAN     | 24  | 0.05 | 0.09 |
| 197 | Glutathione peroxidase 3 OS=Homo sapiens GN=GPX3 PE=1 SV=2                                            | GPX3_HUMAN      | 26  | 0.05 | 0.08 |
| 198 | Coagulation factor X OS=Homo sapiens GN=F10 PE=1 SV=2                                                 | FA10_HUMAN      | 55  | 0.05 | 0.04 |
| 199 | Zinc-alpha-2-glycoprotein OS=Homo sapiens GN=AZGP1 PE=1 SV=2                                          | ZA2G_HUMAN      | 34  | 0.04 | 0.02 |
| 200 | Plasma serine protease inhibitor OS=Homo sapiens GN=SERPINA5 PE=1 SV=3                                | IPSP_HUMAN      | 46  | 0.04 | 0.02 |
| 201 | Fructose-bisphosphate aldolase A OS=Homo sapiens GN=ALDOA PE=1 SV=2                                   | ALDOA_HUMAN     | 39  | 0.04 | 0.03 |
| 202 | High affinity immunoglobulin epsilon receptor subunit gamma OS=Homo sapiens GN=FCER1G PE=1 SV=1       | FCERG_HUMAN     | 10  | 0.04 | 0.07 |
| 203 | ADP-ribosylation factor 1 OS=Homo sapiens GN=ARF1 PE=1 SV=2                                           | ARF1_HUMAN (+1) | 21  | 0.04 | 0.06 |
| 204 | Guanine nucleotide-binding protein G(I)/G(S)/G(T) subunit beta-1 OS=Homo sapiens GN=GNB1 PE=1 SV=3    | GBB1_HUMAN      | 37  | 0.03 | 0.06 |
| 205 | Ig kappa chain V-II region FR OS=Homo sapiens PE=1 SV=1                                               | KV202_HUMAN     | 13  | 0.03 | 0.05 |
| 206 | Integrin alpha-6 OS=Homo sapiens GN=ITGA6 PE=1 SV=4                                                   | ITA6_HUMAN      | 127 | 0.03 | 0.01 |
| 207 | Alpha-enolase OS=Homo sapiens GN=ENO1 PE=1 SV=2                                                       | ENOA_HUMAN      | 47  | 0.02 | 0.03 |
| 208 | Leukocyte surface antigen CD47 OS=Homo sapiens GN=CD47 PE=1 SV=1                                      | CD47_HUMAN      | 35  | 0.02 | 0.04 |
| 209 | L-lactate dehydrogenase A chain OS=Homo sapiens GN=LDHA PE=1 SV=2                                     | LDHA_HUMAN      | 37  | 0.02 | 0.02 |
| 210 | Junction plakoglobin OS=Homo sapiens GN=JUP PE=1 SV=3                                                 | PLAK_HUMAN      | 82  | 0.02 | 0.03 |
| 211 | Keratin, type II cuticular Hb3 OS=Homo sapiens GN=KRT83 PE=1 SV=2                                     | KRT83_HUMAN     | 54  | 0.02 | 0.00 |
| 212 | Leucine-rich alpha-2-glycoprotein OS=Homo sapiens GN=LRG1 PE=1 SV=2                                   | A2GL_HUMAN      | 38  | 0.02 | 0.02 |
| 213 | Coagulation factor XII OS=Homo sapiens GN=F12 PE=1 SV=3                                               | FA12_HUMAN      | 68  | 0.02 | 0.04 |
| 214 | 14-3-3 protein theta OS=Homo sapiens GN=YWHAQ PE=1 SV=1                                               | 1433T_HUMAN     | 28  | 0.02 | 0.04 |
| 215 | Ras-related C3 botulinum toxin substrate 1 OS=Homo sapiens GN=RAC1 PE=1 SV=1                          | RAC1_HUMAN      | 21  | 0.02 | 0.03 |
| 216 | Beta-2-glycoprotein 1 OS=Homo sapiens GN=APOH PE=1 SV=3                                               | APOH_HUMAN      | 38  | 0.02 | 0.02 |
| 217 | Transforming protein RhoA OS=Homo sapiens GN=RHOA PE=1 SV=1                                           | RHOA_HUMAN      | 22  | 0.02 | 0.03 |
| 218 | Platelet endothelial cell adhesion molecule OS=Homo sapiens GN=PECAM1 PE=1 SV=1                       | PECA1_HUMAN     | 83  | 0.02 | 0.02 |
| 219 | Retinol-binding protein 4 OS=Homo sapiens GN=RBP4 PE=1 SV=3                                           | RET4_HUMAN      | 23  | 0.02 | 0.03 |
| 220 | Brain acid soluble protein 1 OS=Homo sapiens GN=BASP1 PE=1 SV=2                                       | BASP1_HUMAN     | 23  | 0.02 | 0.03 |
| 221 | L-lactate dehydrogenase B chain OS=Homo sapiens GN=LDHB PE=1 SV=2                                     | LDHB_HUMAN      | 37  | 0.02 | 0.03 |
| 222 | Filaggrin-2 OS=Homo sapiens GN=FLG2 PE=1 SV=1                                                         | FILA2_HUMAN     | 248 | 0.02 | 0.01 |
| 223 | Platelet glycoprotein Ib beta chain OS=Homo sapiens GN=GP1BB PE=1 SV=1                                | GP1BB_HUMAN     | 22  | 0.02 | 0.03 |
| 224 | Zyxin OS=Homo sapiens GN=ZYX PE=1 SV=1                                                                | ZYX_HUMAN       | 61  | 0.01 | 0.02 |
| 225 | Desmoglein-1 OS=Homo sapiens GN=DSG1 PE=1 SV=2                                                        | DSG1_HUMAN      | 114 | 0.01 | 0.02 |
| 226 | Tenascin OS=Homo sapiens GN=TNC PE=1 SV=3                                                             | TENA_HUMAN      | 241 | 0.01 | 0.01 |
| 227 | Desmocollin-1 OS=Homo sapiens GN=DSC1 PE=1 SV=2                                                       | DSC1_HUMAN      | 100 | 0.01 | 0.02 |
| 228 | Desmoplakin OS=Homo sapiens GN=DSP PE=1 SV=3                                                          | DESP_HUMAN      | 332 | 0.01 | 0.00 |
| 229 | Multimerin-1 OS=Homo sapiens GN=MMRN1 PE=1 SV=3                                                       | MMRN1_HUMAN     | 138 | 0.01 | 0.01 |
| 230 | Kallistatin OS=Homo sapiens GN=SERPINA4 PE=1 SV=3                                                     | KAIN_HUMAN      | 49  | 0.01 | 0.01 |
| 231 | Guanine nucleotide-binding protein G(q) subunit alpha OS=Homo sapiens GN=GNAQ PE=1 SV=4               | GNAQ_HUMAN      | 42  | 0.01 | 0.01 |
| 232 | Cholesteryl ester transfer protein OS=Homo sapiens GN=CETP PE=1 SV=2                                  | CETP_HUMAN      | 55  | 0.01 | 0.01 |
| 233 | Solute carrier family 2, facilitated glucose transporter member 1 OS=Homo sapiens GN=SLC2A1 PE=1 SV=2 | GTR1_HUMAN      | 54  | 0.01 | 0.01 |
| 234 | Complement factor H-related protein 5 OS=Homo sapiens GN=CFHR5 PE=1 SV=1                              | FHR5_HUMAN      | 64  | 0.01 | 0.01 |
| 235 | Keratin, type II cytoskeletal 73 OS=Homo sapiens GN=KRT73 PE=1 SV=1                                   | K2C73_HUMAN     | 59  | 0.01 | 0.01 |
| 236 | Proto-oncogene tyrosine-protein kinase Src OS=Homo sapiens GN=SRC PE=1 SV=3                           | SRC_HUMAN       | 60  | 0.01 | 0.01 |
| 237 | WD repeat-containing protein 1 OS=Homo sapiens GN=WDR1 PE=1 SV=4                                      | WDR1_HUMAN      | 66  | 0.01 | 0.01 |
