# Supplementary material for: A proteomics-based methodology to investigate the protein corona effect for targeted drug delivery
Source: Royal Society of Chemistry journal article supplement (doi:10.1039/c4mb00292j), 2014-08-05
Supplement: c4mb00292j2.xlsx [file c4mb00292j2.xlsx]

## Sheet: Table S2
Table S2. full list of all identified peptides with the protein identification probability, the percentage of sequence coverage, the number of total and unique peptides, the peptide sequence, peptide identification probability and the peptide charge
MS/MS sample name	Protein name	Protein accession numbers	Database sources	Protein molecular weight (Da)	Protein identification probability	Exclusive unique peptide count	Exclusive unique spectrum count	Total spectrum count	Percentage of total spectra	Percentage sequence coverage	Peptide sequence	Previous amino acid	Next amino acid	Best Peptide identification probability	Best Mascot Ion score	Best Mascot Identity score	Best Mascot Delta Ion score	Best X! Tandem -log(e) score	Number of identified +1H spectra	Number of identified +2H spectra	Number of identified +3H spectra	Number of identified +4H spectra	Number of enzymatic termini	Calculated +1H Peptide Mass (AMU)	Median Retention Time	Total Precursor Intensity	Total TIC	Peptide start index	Peptide stop index	Star Category	Assigned	Other Proteins
Exp1_01	Thrombospondin-1 OS=Homo sapiens GN=THBS1 PE=1 SV=2	TSP1_HUMAN	swissprot_2012.fasta	129382	100.0%	6	6	6	0.0428%	5.73%	FYVVMWK	R	Q	96.4%	27.9	28.9	27.9	1.24	0	1	0	0	2	9725011			5580.24	1035	1041	Empty	true	TSP4_HUMANCOMP_HUMAN
Exp1_01	Thrombospondin-1 OS=Homo sapiens GN=THBS1 PE=1 SV=2	TSP1_HUMAN	swissprot_2012.fasta	129382	100.0%	6	6	6	0.0428%	5.73%	GGVNDNFQGVLQNVR	K	F	99.7%	57.8	30.0	57.8	2.82	0	1	0	0	2	1616.81			6465.85	202	216	Empty	true
Exp1_01	Thrombospondin-1 OS=Homo sapiens GN=THBS1 PE=1 SV=2	TSP1_HUMAN	swissprot_2012.fasta	129382	100.0%	6	6	6	0.0428%	5.73%	IMADSGPIYDK	K	T	99.7%	70.5	28.1	52.5	3.12	0	1	0	0	2	1209.58			14431.6	1131	1141	Empty	true
Exp1_01	Thrombospondin-1 OS=Homo sapiens GN=THBS1 PE=1 SV=2	TSP1_HUMAN	swissprot_2012.fasta	129382	100.0%	6	6	6	0.0428%	5.73%	QVTQSYWDTNPTR	K	A	99.7%	69.7	28.5	69.7	4.00	0	1	0	0	2	1595.74			5599.86	1042	1054	Empty	true
Exp1_01	Thrombospondin-1 OS=Homo sapiens GN=THBS1 PE=1 SV=2	TSP1_HUMAN	swissprot_2012.fasta	129382	100.0%	6	6	6	0.0428%	5.73%	SITLFVQEDR	K	A	98.6%	31.0	29.1	31.0	1.48	0	1	0	0	2	1207.63			9301.33	155	164	Empty	true
Exp1_01	Thrombospondin-1 OS=Homo sapiens GN=THBS1 PE=1 SV=2	TSP1_HUMAN	swissprot_2012.fasta	129382	100.0%	6	6	6	0.0428%	5.73%	TIVTTLQDSIR	R	K	99.7%	37.1	27.1	37.1	1.40	0	1	0	0	2	1246.7			21188.6	289	299	Empty	true
Exp1_01	14-3-3 protein eta OS=Homo sapiens GN=YWHAH PE=1 SV=4	1433F_HUMAN	swissprot_2012.fasta	28219.6	100.0%	2	2	2	0.0143%	11.8%	GDREQLLQR	M	A	99.7%	40.5	27.2	16.2	1.80	0	1	0	0	1	1156.61			10350	2	10	Empty	true
Exp1_01	14-3-3 protein eta OS=Homo sapiens GN=YWHAH PE=1 SV=4	1433F_HUMAN	swissprot_2012.fasta	28219.6	100.0%	2	2	2	0.0143%	11.8%	NLLSVAYK	R	N	99.6%	44.6	25.0	19.5	0.000	0	1	0	0	2	9075247			30700.9	43	50	Empty	false	1433Z_HUMAN1433T_HUMAN1433B_HUMAN1433G_HUMAN1433E_HUMAN
Exp1_01	14-3-3 protein eta OS=Homo sapiens GN=YWHAH PE=1 SV=4	1433F_HUMAN	swissprot_2012.fasta	28219.6	100.0%	2	2	2	0.0143%	11.8%	NSVVEASEAAYK	K	E	99.7%	65.2	28.1	48.0	1.92	0	1	0	0	2	1267.62			4619.37	144	155	Empty	true
Exp1_01	Inter-alpha-trypsin inhibitor heavy chain H4 OS=Homo sapiens GN=ITIH4 PE=1 SV=4	ITIH4_HUMAN	swissprot_2012.fasta	103358	100.0%	13	15	15	0.107%	18.5%	AEAQAQYSAAVAK	K	G	99.7%	93.4	29.5	78.0	7.47	0	1	0	0	2	1307.66			6934.4	99	111	Empty	true
Exp1_01	Inter-alpha-trypsin inhibitor heavy chain H4 OS=Homo sapiens GN=ITIH4 PE=1 SV=4	ITIH4_HUMAN	swissprot_2012.fasta	103358	100.0%	13	15	15	0.107%	18.5%	ANTVQEATFQMELPK	R	K	99.7%	68.1	29.9	68.1	4.92	0	1	0	0	2	1706.84			1386.58	61	75	Empty	true
Exp1_01	Inter-alpha-trypsin inhibitor heavy chain H4 OS=Homo sapiens GN=ITIH4 PE=1 SV=4	ITIH4_HUMAN	swissprot_2012.fasta	103358	100.0%	13	15	15	0.107%	18.5%	FKPTLSQQQK	R	S	98.0%	28.9	28.1	9.70	2.10	0	1	0	0	2	1204.67			11503.4	215	224	Empty	true
Exp1_01	Inter-alpha-trypsin inhibitor heavy chain H4 OS=Homo sapiens GN=ITIH4 PE=1 SV=4	ITIH4_HUMAN	swissprot_2012.fasta	103358	100.0%	13	15	15	0.107%	18.5%	GPDVLTATVSGK	R	L	99.7%	79.7	29.0	79.7	4.60	0	1	0	0	2	1144.62			36878.3	501	512	Empty	true
Exp1_01	Inter-alpha-trypsin inhibitor heavy chain H4 OS=Homo sapiens GN=ITIH4 PE=1 SV=4	ITIH4_HUMAN	swissprot_2012.fasta	103358	100.0%	13	15	15	0.107%	18.5%	ILDDLSPR	K	D	99.7%	60.5	25.9	46.4	0.000	0	1	0	0	2	9285100			31537.6	300	307	Empty	true
Exp1_01	Inter-alpha-trypsin inhibitor heavy chain H4 OS=Homo sapiens GN=ITIH4 PE=1 SV=4	ITIH4_HUMAN	swissprot_2012.fasta	103358	100.0%	13	15	15	0.107%	18.5%	LALDNGGLAR	K	R	99.7%	65.1	25.6	46.6	2.39	0	1	0	0	2	9995583			2498.56	429	438	Empty	true
Exp1_01	Inter-alpha-trypsin inhibitor heavy chain H4 OS=Homo sapiens GN=ITIH4 PE=1 SV=4	ITIH4_HUMAN	swissprot_2012.fasta	103358	100.0%	13	15	15	0.107%	18.5%	LGVYELLLK	R	V	99.7%	59.8	25.0	42.1	4.44	0	1	0	0	2	1047.64			24776.2	154	162	Empty	true
Exp1_01	Inter-alpha-trypsin inhibitor heavy chain H4 OS=Homo sapiens GN=ITIH4 PE=1 SV=4	ITIH4_HUMAN	swissprot_2012.fasta	103358	100.0%	13	15	15	0.107%	18.5%	LQDRGPDVLTATVSGK	K	L	99.7%	34.5	29.0	34.5	2.23	0	0	1	0	2	1656.89			11964.1	497	512	Empty	true
Exp1_01	Inter-alpha-trypsin inhibitor heavy chain H4 OS=Homo sapiens GN=ITIH4 PE=1 SV=4	ITIH4_HUMAN	swissprot_2012.fasta	103358	100.0%	13	15	15	0.107%	18.5%	NMEQFQVSVSVAPNAK	R	I	99.7%	48.4	30.2	35.1	3.92	0	1	0	0	2	1748.86			4462.7	124	139	Empty	true
Exp1_01	Inter-alpha-trypsin inhibitor heavy chain H4 OS=Homo sapiens GN=ITIH4 PE=1 SV=4	ITIH4_HUMAN	swissprot_2012.fasta	103358	100.0%	13	15	15	0.107%	18.5%	NPLVWVHASPEHVVVTR	K	N	99.7%	60.0	27.3	60.0	6.77	0	0	1	1	2	1940.05			59276.7	789	805	Empty	true
Exp1_01	Inter-alpha-trypsin inhibitor heavy chain H4 OS=Homo sapiens GN=ITIH4 PE=1 SV=4	ITIH4_HUMAN	swissprot_2012.fasta	103358	100.0%	13	15	15	0.107%	18.5%	QGPVNLLSDPEQGVEVTGQYER	R	E	99.6%	46.5	30.2	46.5	0.000	0	0	1	0	2	2415.18			10494	754	775	Empty	true
Exp1_01	Inter-alpha-trypsin inhibitor heavy chain H4 OS=Homo sapiens GN=ITIH4 PE=1 SV=4	ITIH4_HUMAN	swissprot_2012.fasta	103358	100.0%	13	15	15	0.107%	18.5%	QLGLPGPPDVPDHAAYHPFR	R	R	99.7%	44.0	30.1	29.4	1.51	0	0	0	1	2	2184.1			37225.4	669	688	Empty	true
Exp1_01	Inter-alpha-trypsin inhibitor heavy chain H4 OS=Homo sapiens GN=ITIH4 PE=1 SV=4	ITIH4_HUMAN	swissprot_2012.fasta	103358	100.0%	13	15	15	0.107%	18.5%	SPEQQETVLDGNLIIR	K	Y	99.7%	99.2	28.4	78.0	7.28	0	1	1	0	2	1811.95			12124.2	225	240	Empty	true
Exp1_01	Complement C4-B OS=Homo sapiens GN=C4B PE=1 SV=1	CO4B_HUMAN	swissprot_2012.fasta	192795	100.0%	65	114	189	1.35%	50.8%	ADGSYAAWLSR	K	D	99.7%	84.4	28.0	70.2	2.96	0	1	0	0	2	1196.57			14748.7	1062	1072	Empty	true
Exp1_01	Complement C4-B OS=Homo sapiens GN=C4B PE=1 SV=1	CO4B_HUMAN	swissprot_2012.fasta	192795	100.0%	65	114	189	1.35%	50.8%	AEFQDALEK	K	L	99.7%	66.1	28.2	44.6	1.39	0	2	0	0	2	1050.51			92274.2	317	325	Empty	true
Exp1_01	Complement C4-B OS=Homo sapiens GN=C4B PE=1 SV=1	CO4B_HUMAN	swissprot_2012.fasta	192795	100.0%	65	114	189	1.35%	50.8%	AEMADQASAWLTR	K	Q	99.7%	84.7	28.9	68.6	4.74	0	1	1	0	2	1449.68			21084.9	1279	1291	Empty	true
Exp1_01	Complement C4-B OS=Homo sapiens GN=C4B PE=1 SV=1	CO4B_HUMAN	swissprot_2012.fasta	192795	100.0%	65	114	189	1.35%	50.8%	ALEILQEEDLIDEDDIPVR	R	S	99.7%	54.1	30.0	54.1	5.48	0	0	1	0	2	2225.12			40566.5	757	775	Empty	true
Exp1_01	Complement C4-B OS=Homo sapiens GN=C4B PE=1 SV=1	CO4B_HUMAN	swissprot_2012.fasta	192795	100.0%	65	114	189	1.35%	50.8%	ANSFLGEK	K	A	98.8%	41.0	26.3	29.4	0.000	0	2	0	0	2	8664255			18132.7	1175	1182	Empty	true
Exp1_01	Complement C4-B OS=Homo sapiens GN=C4B PE=1 SV=1	CO4B_HUMAN	swissprot_2012.fasta	192795	100.0%	65	114	189	1.35%	50.8%	AVGSGATFSHYYYMILSR	R	G	99.7%	102	29.9	102	6.59	0	1	1	0	2	2022.97			263210	495	512	Empty	true
Exp1_01	Complement C4-B OS=Homo sapiens GN=C4B PE=1 SV=1	CO4B_HUMAN	swissprot_2012.fasta	192795	100.0%	65	114	189	1.35%	50.8%	DFALLSLQVPLK	R	D	99.7%	81.1	25.0	66.8	4.85	0	2	0	0	2	1343.79			140647	81	92	Empty	true
Exp1_01	Complement C4-B OS=Homo sapiens GN=C4B PE=1 SV=1	CO4B_HUMAN	swissprot_2012.fasta	192795	100.0%	65	114	189	1.35%	50.8%	DFALLSLQVPLKDAK	R	S	99.7%	69.3	25.0	57.8	5.96	0	2	1	0	2	1657.95			353120	81	95	Empty	true
Exp1_01	Complement C4-B OS=Homo sapiens GN=C4B PE=1 SV=1	CO4B_HUMAN	swissprot_2012.fasta	192795	100.0%	65	114	189	1.35%	50.8%	DHAVDLIQK	K	G	99.7%	54.0	25.7	43.1	1.85	0	2	0	0	2	1038.56			215450	1043	1051	Empty	true
Exp1_01	Complement C4-B OS=Homo sapiens GN=C4B PE=1 SV=1	CO4B_HUMAN	swissprot_2012.fasta	192795	100.0%	65	114	189	1.35%	50.8%	DSSTWLTAFVLK	R	V	99.7%	63.6	27.9	48.3	3.08	0	1	1	0	2	1367.72			15759.4	1073	1084	Empty	true
Exp1_01	Complement C4-B OS=Homo sapiens GN=C4B PE=1 SV=1	CO4B_HUMAN	swissprot_2012.fasta	192795	100.0%	65	114	189	1.35%	50.8%	EAPKVVEEQESR	R	V	99.7%	43.4	29.1	43.4	2.62	0	1	1	0	2	1400.7			8176	1454	1465	Empty	true
Exp1_01	Complement C4-B OS=Homo sapiens GN=C4B PE=1 SV=1	CO4B_HUMAN	swissprot_2012.fasta	192795	100.0%	65	114	189	1.35%	50.8%	EGAIHREELVYELNPLDHR	K	G	99.7%	39.9	30.1	39.9	3.47	0	0	2	0	2	2290.16			225209	936	954	Empty	true
Exp1_01	Complement C4-B OS=Homo sapiens GN=C4B PE=1 SV=1	CO4B_HUMAN	swissprot_2012.fasta	192795	100.0%	65	114	189	1.35%	50.8%	EMSGSPASGIPVK	R	V	99.7%	60.6	29.2	49.8	4.72	0	3	0	0	2	1259.63			468692	392	404	Empty	true
Exp1_01	Complement C4-B OS=Homo sapiens GN=C4B PE=1 SV=1	CO4B_HUMAN	swissprot_2012.fasta	192795	100.0%	65	114	189	1.35%	50.8%	EVYMPSSIFQDDFVIPDISEPGTWK	K	I	99.7%	73.0	30.0	73.0	8.25	0	1	0	0	2	2900.37			6288.78	190	214	Empty	true
Exp1_01	Complement C4-B OS=Homo sapiens GN=C4B PE=1 SV=1	CO4B_HUMAN	swissprot_2012.fasta	192795	100.0%	65	114	189	1.35%	50.8%	FGLLDEDGK	R	K	99.7%	51.4	28.7	34.4	1.96	0	1	0	0	2	9934890			32057.1	284	292	Empty	true
Exp1_01	Complement C4-B OS=Homo sapiens GN=C4B PE=1 SV=1	CO4B_HUMAN	swissprot_2012.fasta	192795	100.0%	65	114	189	1.35%	50.8%	FGLLDEDGKK	R	T	99.7%	40.3	28.8	19.7	1.54	0	2	0	0	2	1121.58			464418	284	293	Empty	true
Exp1_01	Complement C4-B OS=Homo sapiens GN=C4B PE=1 SV=1	CO4B_HUMAN	swissprot_2012.fasta	192795	100.0%	65	114	189	1.35%	50.8%	FQILTLWLPDSLTTWEIHGLSLSK	R	T	99.7%	57.1	25.0	45.3	3.77	0	0	1	0	2	2798.51			49322	792	815	Empty	true
Exp1_01	Complement C4-B OS=Homo sapiens GN=C4B PE=1 SV=1	CO4B_HUMAN	swissprot_2012.fasta	192795	100.0%	65	114	189	1.35%	50.8%	GCGEQTMIYLAPTLAASR	R	Y	99.7%	85.1	29.5	62.8	4.89	0	1	1	0	2	1939.93			27264.5	1009	1026	Empty	true
Exp1_01	Complement C4-B OS=Homo sapiens GN=C4B PE=1 SV=1	CO4B_HUMAN	swissprot_2012.fasta	192795	100.0%	65	114	189	1.35%	50.8%	GHLFLQTDQPIYNPGQR	R	V	99.7%	105	29.7	72.6	9.11	0	1	1	0	2	1984			61392.7	139	155	Empty	true
Exp1_01	Complement C4-B OS=Homo sapiens GN=C4B PE=1 SV=1	CO4B_HUMAN	swissprot_2012.fasta	192795	100.0%	65	114	189	1.35%	50.8%	GLEEELQFSLGSK	R	I	99.7%	85.0	28.9	85.0	5.19	0	3	2	0	2	1436.73			42819.1	1353	1365	Empty	true
Exp1_01	Complement C4-B OS=Homo sapiens GN=C4B PE=1 SV=1	CO4B_HUMAN	swissprot_2012.fasta	192795	100.0%	65	114	189	1.35%	50.8%	GLQDEDGYR	R	M	99.7%	51.2	25.1	36.3	0.000	0	2	0	0	2	1052.46			218891	1605	1613	Empty	true
Exp1_01	Complement C4-B OS=Homo sapiens GN=C4B PE=1 SV=1	CO4B_HUMAN	swissprot_2012.fasta	192795	100.0%	65	114	189	1.35%	50.8%	GPEVQLVAHSPWLK	R	D	99.7%	59.6	27.0	59.6	4.66	0	2	2	0	2	1560.85			486411	105	118	Empty	true
Exp1_01	Complement C4-B OS=Homo sapiens GN=C4B PE=1 SV=1	CO4B_HUMAN	swissprot_2012.fasta	192795	100.0%	65	114	189	1.35%	50.8%	GQIVFMNR	R	E	99.7%	47.4	28.3	47.4	2.60	0	2	0	0	2	9645033			205331	513	520	Empty	true
Exp1_01	Complement C4-B OS=Homo sapiens GN=C4B PE=1 SV=1	CO4B_HUMAN	swissprot_2012.fasta	192795	100.0%	65	114	189	1.35%	50.8%	HLVPGAPFLLQALVR	R	E	99.7%	64.0	25.0	51.0	2.30	0	2	2	0	2	1630.98			808458	377	391	Empty	true
Exp1_01	Complement C4-B OS=Homo sapiens GN=C4B PE=1 SV=1	CO4B_HUMAN	swissprot_2012.fasta	192795	100.0%	65	114	189	1.35%	50.8%	ITPGKPYILTVPGHLDEMQLDIQAR	K	Y	99.7%	36.7	26.2	36.7	0.959	0	0	0	1	2	2805.5			84709.9	245	269	Empty	true
Exp1_01	Complement C4-B OS=Homo sapiens GN=C4B PE=1 SV=1	CO4B_HUMAN	swissprot_2012.fasta	192795	100.0%	65	114	189	1.35%	50.8%	ITQVLHFTK	K	D	99.4%	31.8	27.1	31.8	1.36	0	1	0	0	2	1086.63			183173	1647	1655	Empty	true
Exp1_01	Complement C4-B OS=Homo sapiens GN=C4B PE=1 SV=1	CO4B_HUMAN	swissprot_2012.fasta	192795	100.0%	65	114	189	1.35%	50.8%	KADGSYAAWLSR	R	D	99.7%	84.7	28.4	84.7	3.80	0	2	3	0	2	1324.66			232008	1061	1072	Empty	true
Exp1_01	Complement C4-B OS=Homo sapiens GN=C4B PE=1 SV=1	CO4B_HUMAN	swissprot_2012.fasta	192795	100.0%	65	114	189	1.35%	50.8%	KKEVYMPSSIFQDDFVIPDISEPGTWK	R	I	99.7%	54.0	29.8	38.9	2.77	0	0	1	0	2	3156.56			7509.86	188	214	Empty	true
Exp1_01	Complement C4-B OS=Homo sapiens GN=C4B PE=1 SV=1	CO4B_HUMAN	swissprot_2012.fasta	192795	100.0%	65	114	189	1.35%	50.8%	KYVLPNFEVK	K	I	99.7%	61.2	25.4	40.4	1.33	0	1	2	0	2	1236.7			224299	235	244	Empty	true
Exp1_01	Complement C4-B OS=Homo sapiens GN=C4B PE=1 SV=1	CO4B_HUMAN	swissprot_2012.fasta	192795	100.0%	65	114	189	1.35%	50.8%	LGQYASPTAK	K	R	99.7%	47.1	27.8	22.2	1.52	0	1	0	0	2	1035.55			17502.5	691	700	Empty	true
Exp1_01	Complement C4-B OS=Homo sapiens GN=C4B PE=1 SV=1	CO4B_HUMAN	swissprot_2012.fasta	192795	100.0%	65	114	189	1.35%	50.8%	LHLETDSLALVALGALDTALYAAGSK	K	S	99.7%	128	25.0	128	8.28	0	1	6	2	2	2613.41			219169	589	614	Empty	true
Exp1_01	Complement C4-B OS=Homo sapiens GN=C4B PE=1 SV=1	CO4B_HUMAN	swissprot_2012.fasta	192795	100.0%	65	114	189	1.35%	50.8%	LLLFSPSVVHLGVPLSVGVQLQDVPR	R	G	99.7%	77.7	25.0	77.7	6.52	0	1	1	1	2	2769.6			95643.9	23	48	Empty	true
Exp1_01	Complement C4-B OS=Homo sapiens GN=C4B PE=1 SV=1	CO4B_HUMAN	swissprot_2012.fasta	192795	100.0%	65	114	189	1.35%	50.8%	LNMGITDLQGLR	K	L	99.7%	92.6	28.8	75.6	2.12	0	2	1	0	2	1330.71			43673.9	326	337	Empty	true
Exp1_01	Complement C4-B OS=Homo sapiens GN=C4B PE=1 SV=1	CO4B_HUMAN	swissprot_2012.fasta	192795	100.0%	65	114	189	1.35%	50.8%	LQETSNWLLSQQQADGSFQDLSPVIHR	K	S	99.7%	80.7	29.7	80.7	3.66	0	0	1	1	2	3097.53			128431	1100	1126	Empty	true
Exp1_01	Complement C4-B OS=Homo sapiens GN=C4B PE=1 SV=1	CO4B_HUMAN	swissprot_2012.fasta	192795	100.0%	65	114	189	1.35%	50.8%	LTVAAPPSGGPGFLSIERPDSRPPR	R	V	99.7%	46.3	26.6	29.2	3.21	0	0	2	0	2	2574.38			25930.9	460	484	Empty	true
Exp1_01	Complement C4-B OS=Homo sapiens GN=C4B PE=1 SV=1	CO4B_HUMAN	swissprot_2012.fasta	192795	100.0%	65	114	189	1.35%	50.8%	LVNGQSHISLSK	K	A	99.7%	73.9	25.6	60.2	7.57	0	4	3	0	2	1282.71			2073070	305	316	Empty	true
Exp1_01	Complement C4-B OS=Homo sapiens GN=C4B PE=1 SV=1	CO4B_HUMAN	swissprot_2012.fasta	192795	100.0%	65	114	189	1.35%	50.8%	MRPSTDTITVMVENSHGLR	K	V	99.7%	74.1	30.2	74.1	7.85	0	0	3	4	2	2144.06			496144	167	185	Empty	true
Exp1_01	Complement C4-B OS=Homo sapiens GN=C4B PE=1 SV=1	CO4B_HUMAN	swissprot_2012.fasta	192795	100.0%	65	114	189	1.35%	50.8%	NPSDPMPQAPALWIETTAYALLHLLLHEGK	R	A	99.7%	54.2	27.4	36.9	4.52	0	0	0	1	2	3326.72			5216.99	1249	1278	Empty	true
Exp1_01	Complement C4-B OS=Homo sapiens GN=C4B PE=1 SV=1	CO4B_HUMAN	swissprot_2012.fasta	192795	100.0%	65	114	189	1.35%	50.8%	QGSFQGGFR	R	S	99.7%	63.1	25.4	63.1	2.24	0	3	0	0	2	9834694			138459	1292	1300	Empty	true
Exp1_01	Complement C4-B OS=Homo sapiens GN=C4B PE=1 SV=1	CO4B_HUMAN	swissprot_2012.fasta	192795	100.0%	65	114	189	1.35%	50.8%	QRVEASISK	K	A	99.7%	40.0	27.6	24.0	2.89	0	1	0	0	2	1017.57			15207.4	1166	1174	Empty	true
Exp1_01	Complement C4-B OS=Homo sapiens GN=C4B PE=1 SV=1	CO4B_HUMAN	swissprot_2012.fasta	192795	100.0%	65	114	189	1.35%	50.8%	RGHLFLQTDQPIYNPGQR	R	V	99.7%	54.3	29.1	42.9	2.89	0	1	4	1	2	2140.1			202872	138	155	Empty	true
Exp1_01	Complement C4-B OS=Homo sapiens GN=C4B PE=1 SV=1	CO4B_HUMAN	swissprot_2012.fasta	192795	100.0%	65	114	189	1.35%	50.8%	RHLVPGAPFLLQALVR	K	E	99.7%	60.3	25.0	60.3	4.34	0	0	2	1	2	1787.08			164340	376	391	Empty	true
Exp1_01	Complement C4-B OS=Homo sapiens GN=C4B PE=1 SV=1	CO4B_HUMAN	swissprot_2012.fasta	192795	100.0%	65	114	189	1.35%	50.8%	SFFPENWLWR	R	V	99.7%	62.5	28.5	62.5	3.05	0	1	0	0	2	1381.67			8836.47	776	785	Empty	true
Exp1_01	Complement C4-B OS=Homo sapiens GN=C4B PE=1 SV=1	CO4B_HUMAN	swissprot_2012.fasta	192795	100.0%	65	114	189	1.35%	50.8%	SHALQLNNR	K	Q	99.7%	38.3	27.0	38.3	1.92	0	2	0	0	2	1052.56			53972.4	1341	1349	Empty	true
Exp1_01	Complement C4-B OS=Homo sapiens GN=C4B PE=1 SV=1	CO4B_HUMAN	swissprot_2012.fasta	192795	100.0%	65	114	189	1.35%	50.8%	SHKPLNMGK	K	V	99.6%	32.3	26.0	32.3	3.14	0	1	0	0	2	1011.54			8411.3	615	623	Empty	true
Exp1_01	Complement C4-B OS=Homo sapiens GN=C4B PE=1 SV=1	CO4B_HUMAN	swissprot_2012.fasta	192795	100.0%	65	114	189	1.35%	50.8%	SMQGGLVGNDETVALTAFVTIALHHGLAVFQDEGAEPLK	R	Q	99.7%	99.1	27.8	83.0	5.03	0	0	1	3	2	4052.04			243664	1127	1165	Empty	true
Exp1_01	Complement C4-B OS=Homo sapiens GN=C4B PE=1 SV=1	CO4B_HUMAN	swissprot_2012.fasta	192795	100.0%	65	114	189	1.35%	50.8%	SMQGGLVGNDETVALTAFVTIALHHGLAVFQDEGAEPLKQR	R	V	99.7%	88.8	25.8	88.8	4.89	0	0	0	1	2	4320.21			566537	1127	1167	Empty	true
Exp1_01	Complement C4-B OS=Homo sapiens GN=C4B PE=1 SV=1	CO4B_HUMAN	swissprot_2012.fasta	192795	100.0%	65	114	189	1.35%	50.8%	STQDTVIALDALSAYWIASHTTEER	R	G	99.7%	107	30.3	87.3	5.89	0	1	1	0	2	2778.36			143280	1301	1325	Empty	true
Exp1_01	Complement C4-B OS=Homo sapiens GN=C4B PE=1 SV=1	CO4B_HUMAN	swissprot_2012.fasta	192795	100.0%	65	114	189	1.35%	50.8%	TEQWSTLPPETK	K	D	99.7%	64.6	29.1	35.1	2.66	0	5	0	0	2	1416.7			58004.4	1031	1042	Empty	true
Exp1_01	Complement C4-B OS=Homo sapiens GN=C4B PE=1 SV=1	CO4B_HUMAN	swissprot_2012.fasta	192795	100.0%	65	114	189	1.35%	50.8%	TLEIPGNSDPNMIPDGDFNSYVR	R	V	99.7%	85.7	29.3	85.7	8.10	0	2	0	0	2	2551.18			61777.4	957	979	Empty	true
Exp1_01	Complement C4-B OS=Homo sapiens GN=C4B PE=1 SV=1	CO4B_HUMAN	swissprot_2012.fasta	192795	100.0%	65	114	189	1.35%	50.8%	TLTSVSVFVDHHLAPSFYFVAFYYHGDHPVANSLR	R	V	99.7%	70.8	29.4	57.4	3.41	0	0	0	1	2	3993.97			254279	525	559	Empty	true
Exp1_01	Complement C4-B OS=Homo sapiens GN=C4B PE=1 SV=1	CO4B_HUMAN	swissprot_2012.fasta	192795	100.0%	65	114	189	1.35%	50.8%	TTNIQGINLLFSSR	R	R	99.7%	86.4	27.8	68.1	7.74	0	2	1	0	2	1563.85			205583	124	137	Empty	true
Exp1_01	Complement C4-B OS=Homo sapiens GN=C4B PE=1 SV=1	CO4B_HUMAN	swissprot_2012.fasta	192795	100.0%	65	114	189	1.35%	50.8%	TYNVLDMK	R	N	99.7%	50.7	26.4	50.7	1.49	0	2	0	0	2	9834867			92769.1	1383	1390	Empty	true
Exp1_01	Complement C4-B OS=Homo sapiens GN=C4B PE=1 SV=1	CO4B_HUMAN	swissprot_2012.fasta	192795	100.0%	65	114	189	1.35%	50.8%	VDFTLSSER	K	D	99.7%	77.0	27.2	56.8	1.51	0	2	0	0	2	1053.52			14872.8	72	80	Empty	true
Exp1_01	Complement C4-B OS=Homo sapiens GN=C4B PE=1 SV=1	CO4B_HUMAN	swissprot_2012.fasta	192795	100.0%	65	114	189	1.35%	50.8%	VDFTLSSERDFALLSLQVPLK	K	D	99.7%	46.6	25.1	35.8	3.92	0	1	0	0	2	2378.3			6132.79	72	92	Empty	true
Exp1_01	Complement C4-B OS=Homo sapiens GN=C4B PE=1 SV=1	CO4B_HUMAN	swissprot_2012.fasta	192795	100.0%	65	114	189	1.35%	50.8%	VDFTLSSERDFALLSLQVPLKDAK	K	S	99.5%	24.3	25.6	24.3	3.41	0	0	1	0	2	2692.46			1352.32	72	95	Empty	true
Exp1_01	Complement C4-B OS=Homo sapiens GN=C4B PE=1 SV=1	CO4B_HUMAN	swissprot_2012.fasta	192795	100.0%	65	114	189	1.35%	50.8%	VEYGFQVK	R	V	99.7%	39.8	26.4	23.8	2.52	0	1	0	0	2	9695040			49041.9	1623	1630	Empty	true
Exp1_01	Complement C4-B OS=Homo sapiens GN=C4B PE=1 SV=1	CO4B_HUMAN	swissprot_2012.fasta	192795	100.0%	65	114	189	1.35%	50.8%	VFALDQK	R	M	97.1%	37.1	26.2	19.3	0.000	0	1	0	0	2	8204564			211506	160	166	Empty	true
Exp1_01	Complement C4-B OS=Homo sapiens GN=C4B PE=1 SV=1	CO4B_HUMAN	swissprot_2012.fasta	192795	100.0%	65	114	189	1.35%	50.8%	VGDTLNLNLR	R	A	99.7%	99.3	27.9	65.7	1.92	0	2	0	0	2	1114.62			331285	485	494	Empty	true
Exp1_01	Complement C4-B OS=Homo sapiens GN=C4B PE=1 SV=1	CO4B_HUMAN	swissprot_2012.fasta	192795	100.0%	65	114	189	1.35%	50.8%	VGLSGMAIADVTLLSGFHALR	K	A	99.7%	129	26.8	110	6.52	0	2	19	2	2	2128.16			2445130	1478	1498	Empty	true
Exp1_01	Complement C4-B OS=Homo sapiens GN=C4B PE=1 SV=1	CO4B_HUMAN	swissprot_2012.fasta	192795	100.0%	65	114	189	1.35%	50.8%	VLSLAQEQVGGSPEK	K	L	99.7%	133	28.9	122	3.12	0	3	1	0	2	1541.82			139818	1085	1099	Empty	true
Exp1_01	Complement C4-B OS=Homo sapiens GN=C4B PE=1 SV=1	CO4B_HUMAN	swissprot_2012.fasta	192795	100.0%	65	114	189	1.35%	50.8%	VTASDPLDTLGSEGALSPGGVASLLR	R	L	99.7%	145	28.7	130	11.2	0	1	1	0	2	2483.3			271152	980	1005	Empty	true
Exp1_01	Complement C4-B OS=Homo sapiens GN=C4B PE=1 SV=1	CO4B_HUMAN	swissprot_2012.fasta	192795	100.0%	65	114	189	1.35%	50.8%	YIYGKPVQGVAYVR	R	F	99.7%	69.7	27.8	69.7	7.01	0	1	1	0	2	1612.88			423781	270	283	Empty	true
Exp1_01	Complement C4-B OS=Homo sapiens GN=C4B PE=1 SV=1	CO4B_HUMAN	swissprot_2012.fasta	192795	100.0%	65	114	189	1.35%	50.8%	YLDKTEQWSTLPPETK	R	D	99.7%	69.6	29.7	59.3	5.47	0	4	6	0	2	1935.97			537845	1027	1042	Empty	true
Exp1_01	Complement C4-B OS=Homo sapiens GN=C4B PE=1 SV=1	CO4B_HUMAN	swissprot_2012.fasta	192795	100.0%	65	114	189	1.35%	50.8%	YVSHFETEGPHVLLYFDSVPTSR	R	E	99.7%	96.5	30.3	96.5	9.43	0	1	1	0	2	2680.3			32262	1511	1533	Empty	true
Exp1_01	Pyruvate kinase isozymes M1/M2 OS=Homo sapiens GN=PKM PE=1 SV=4	KPYM_HUMAN	swissprot_2012.fasta	57937.5	100.0%	3	3	3	0.0214%	7.34%	ITLDNAYMEK	K	C	98.8%	26.4	26.4	26.4	2.52	0	1	0	0	2	1197.58			14225.1	142	151	Empty	true
Exp1_01	Pyruvate kinase isozymes M1/M2 OS=Homo sapiens GN=PKM PE=1 SV=4	KPYM_HUMAN	swissprot_2012.fasta	57937.5	100.0%	3	3	3	0.0214%	7.34%	IYVDDGLISLQVK	K	Q	99.7%	34.2	25.0	16.5	3.70	0	1	0	0	2	1462.82			5443.45	174	186	Empty	true
Exp1_01	Pyruvate kinase isozymes M1/M2 OS=Homo sapiens GN=PKM PE=1 SV=4	KPYM_HUMAN	swissprot_2012.fasta	57937.5	100.0%	3	3	3	0.0214%	7.34%	LNFSHGTHEYHAETIK	R	N	99.7%	55.9	29.2	55.9	1.27	0	0	1	0	2	1883.9			6472.77	74	89	Empty	true
Exp1_01	Desmoplakin OS=Homo sapiens GN=DSP PE=1 SV=3	DESP_HUMAN	swissprot_2012.fasta	331781	100.0%	2	2	2	0.0143%	0.697%	STLEAETR	K	V	96.2%	38.9	29.1	24.8	0.000	0	1	0	0	2	9064527			4277.55	1841	1848	Empty	true
Exp1_01	Desmoplakin OS=Homo sapiens GN=DSP PE=1 SV=3	DESP_HUMAN	swissprot_2012.fasta	331781	100.0%	2	2	2	0.0143%	0.697%	YEVTSGGGGTSR	R	M	99.7%	76.9	26.5	66.6	1.49	0	1	0	0	2	1170.54			5953.66	28	39	Empty	true
Exp1_01	Keratin type II cytoskeletal 6A OS=Homo sapiens GN=KRT6A PE=1 SV=3	K2C6A_HUMAN	swissprot_2012.fasta	60046.4	100.0%	4	5	5	0.0356%	15.4%	AIGGGLSSVGGGSSTIK	R	Y	99.7%	73.3	28.3	73.3	6.48	0	1	0	0	2	1447.78			6789.51	534	550	Empty	true	K2C6C_HUMAN
Exp1_01	Keratin type II cytoskeletal 6A OS=Homo sapiens GN=KRT6A PE=1 SV=3	K2C6A_HUMAN	swissprot_2012.fasta	60046.4	100.0%	4	5	5	0.0356%	15.4%	AQYEEIAQR	K	S	99.7%	69.3	28.8	53.7	2.29	0	1	0	0	2	1107.54			30535.7	339	347	Empty	false	K22E_HUMANK2C4_HUMANK2C6C_HUMAN
Exp1_01	Keratin type II cytoskeletal 6A OS=Homo sapiens GN=KRT6A PE=1 SV=3	K2C6A_HUMAN	swissprot_2012.fasta	60046.4	100.0%	4	5	5	0.0356%	15.4%	FASFIDK	K	V	99.0%	29.3	26.3	0.000	2.29	0	1	0	0	2	8274298			22757.3	174	180	Empty	false	K22E_HUMANK2C73_HUMANK2C4_HUMANK2C6C_HUMANK2C1_HUMANK2C5_HUMAN
Exp1_01	Keratin type II cytoskeletal 6A OS=Homo sapiens GN=KRT6A PE=1 SV=3	K2C6A_HUMAN	swissprot_2012.fasta	60046.4	100.0%	4	5	5	0.0356%	15.4%	FASFIDKVR	K	F	99.7%	43.3	25.7	0.000	2.89	0	1	0	0	2	1082.6			18109.7	174	182	Empty	false	K22E_HUMANK2C73_HUMANK2C6C_HUMANK2C1_HUMANK2C5_HUMAN
Exp1_01	Keratin type II cytoskeletal 6A OS=Homo sapiens GN=KRT6A PE=1 SV=3	K2C6A_HUMAN	swissprot_2012.fasta	60046.4	100.0%	4	5	5	0.0356%	15.4%	KYEDEINKR	N	T	99.7%	51.5	29.1	35.9	3.74	0	1	0	0	1	1194.61			12743.6	252	260	Empty	false	K22E_HUMANK2C6C_HUMANK2C1_HUMANK2C5_HUMAN
Exp1_01	Keratin type II cytoskeletal 6A OS=Homo sapiens GN=KRT6A PE=1 SV=3	K2C6A_HUMAN	swissprot_2012.fasta	60046.4	100.0%	4	5	5	0.0356%	15.4%	LALDVEIATYR	K	K	99.7%	72.5	26.7	28.9	5.70	0	1	0	0	2	1263.69			9234.07	456	466	Empty	false	K22E_HUMANK2C6C_HUMANK2C5_HUMAN
Exp1_01	Keratin type II cytoskeletal 6A OS=Homo sapiens GN=KRT6A PE=1 SV=3	K2C6A_HUMAN	swissprot_2012.fasta	60046.4	100.0%	4	5	5	0.0356%	15.4%	NKYEDEINKR	K	T	99.7%	58.6	28.8	35.6	1.46	0	1	1	0	2	1308.65			221784	251	260	Empty	false	K2C6C_HUMANK2C1_HUMANK2C5_HUMAN
Exp1_01	Keratin type II cytoskeletal 6A OS=Homo sapiens GN=KRT6A PE=1 SV=3	K2C6A_HUMAN	swissprot_2012.fasta	60046.4	100.0%	4	5	5	0.0356%	15.4%	RGFSANSAR	R	L	98.6%	41.0	27.0	27.5	0.000	0	1	0	0	2	9654910			4705.63	16	24	Empty	true	K2C6C_HUMAN
Exp1_01	Keratin type II cytoskeletal 6A OS=Homo sapiens GN=KRT6A PE=1 SV=3	K2C6A_HUMAN	swissprot_2012.fasta	60046.4	100.0%	4	5	5	0.0356%	15.4%	TAAENEFVTLKK	R	D	99.7%	40.7	27.5	28.7	1.72	0	1	1	0	2	1350.73			54198	261	272	Empty	true	K2C6C_HUMAN
Exp1_01	Keratin type II cytoskeletal 6A OS=Homo sapiens GN=KRT6A PE=1 SV=3	K2C6A_HUMAN	swissprot_2012.fasta	60046.4	100.0%	4	5	5	0.0356%	15.4%	YEDEINKR	K	T	99.3%	31.4	27.2	31.4	2.68	0	1	0	0	2	1066.52			16202.5	253	260	Empty	false	K22E_HUMANK2C6C_HUMANK2C1_HUMANK2C5_HUMAN
Exp1_01	Keratin type II cytoskeletal 6A OS=Homo sapiens GN=KRT6A PE=1 SV=3	K2C6A_HUMAN	swissprot_2012.fasta	60046.4	100.0%	4	5	5	0.0356%	15.4%	YEELQVTAGR	K	H	99.7%	86.5	28.7	67.5	3.47	0	1	0	0	2	1165.58			14797.9	360	369	Empty	true	K2C6C_HUMAN
Exp1_01	Serotransferrin OS=Homo sapiens GN=TF PE=1 SV=3	TRFE_HUMAN	swissprot_2012.fasta	77064.3	100.0%	17	22	23	0.164%	26.8%	APNHAVVTR	R	K	99.7%	46.1	25.5	46.1	3.00	0	1	0	0	2	9645322			29339.6	601	609	Empty	true
Exp1_01	Serotransferrin OS=Homo sapiens GN=TF PE=1 SV=3	TRFE_HUMAN	swissprot_2012.fasta	77064.3	100.0%	17	22	23	0.164%	26.8%	APNHAVVTRK	R	D	99.7%	35.3	25.0	25.0	1.82	0	1	0	0	2	1092.63			4919.75	601	610	Empty	true
Exp1_01	Serotransferrin OS=Homo sapiens GN=TF PE=1 SV=3	TRFE_HUMAN	swissprot_2012.fasta	77064.3	100.0%	17	22	23	0.164%	26.8%	DGAGDVAFVK	K	H	99.6%	33.3	28.0	33.3	3.55	0	1	0	0	2	9784892			11718	216	225	Empty	true
Exp1_01	Serotransferrin OS=Homo sapiens GN=TF PE=1 SV=3	TRFE_HUMAN	swissprot_2012.fasta	77064.3	100.0%	17	22	23	0.164%	26.8%	DSGFQMNQLR	K	G	99.7%	76.4	27.2	49.8	3.49	0	2	0	0	2	1195.55			23110.7	123	132	Empty	true
Exp1_01	Serotransferrin OS=Homo sapiens GN=TF PE=1 SV=3	TRFE_HUMAN	swissprot_2012.fasta	77064.3	100.0%	17	22	23	0.164%	26.8%	EDPQTFYYAVAVVK	K	K	99.7%	71.7	30.0	60.5	4.64	0	1	1	0	2	1629.82			22045.5	108	121	Empty	true
Exp1_01	Serotransferrin OS=Homo sapiens GN=TF PE=1 SV=3	TRFE_HUMAN	swissprot_2012.fasta	77064.3	100.0%	17	22	23	0.164%	26.8%	EGYYGYTGAFR	K	C	99.7%	46.2	25.1	46.2	3.06	0	1	0	0	2	1283.57			74896.4	531	541	Empty	true
Exp1_01	Serotransferrin OS=Homo sapiens GN=TF PE=1 SV=3	TRFE_HUMAN	swissprot_2012.fasta	77064.3	100.0%	17	22	23	0.164%	26.8%	HQTVPQNTGGKNPDPWAK	K	N	99.7%	43.2	30.2	43.2	2.89	0	0	1	0	2	1974.98			9562.49	554	571	Empty	true
Exp1_01	Serotransferrin OS=Homo sapiens GN=TF PE=1 SV=3	TRFE_HUMAN	swissprot_2012.fasta	77064.3	100.0%	17	22	23	0.164%	26.8%	HSTIFENLANK	K	A	98.8%	41.6	29.9	17.7	0.000	0	0	1	0	2	1273.65			12447.4	226	236	Empty	true
Exp1_01	Serotransferrin OS=Homo sapiens GN=TF PE=1 SV=3	TRFE_HUMAN	swissprot_2012.fasta	77064.3	100.0%	17	22	23	0.164%	26.8%	KDSGFQMNQLR	K	G	99.7%	42.3	28.3	42.3	1.49	0	1	1	0	2	1323.65			36439.9	122	132	Empty	true
Exp1_01	Serotransferrin OS=Homo sapiens GN=TF PE=1 SV=3	TRFE_HUMAN	swissprot_2012.fasta	77064.3	100.0%	17	22	23	0.164%	26.8%	KPVEEYANCHLAR	R	A	99.7%	56.6	28.4	41.8	4.92	0	0	1	0	2	1587.76			17930.3	588	600	Empty	true
Exp1_01	Serotransferrin OS=Homo sapiens GN=TF PE=1 SV=3	TRFE_HUMAN	swissprot_2012.fasta	77064.3	100.0%	17	22	23	0.164%	26.8%	LCMGSGLNLCEPNNK	K	E	99.7%	40.4	25.9	40.4	3.49	0	1	0	0	2	1708.73			63516.8	516	530	Empty	true
Exp1_01	Serotransferrin OS=Homo sapiens GN=TF PE=1 SV=3	TRFE_HUMAN	swissprot_2012.fasta	77064.3	100.0%	17	22	23	0.164%	26.8%	MYLGYEYVTAIR	K	N	99.7%	73.1	29.8	62.2	4.10	0	1	1	0	2	1478.73			41415.9	332	343	Empty	true
Exp1_01	Serotransferrin OS=Homo sapiens GN=TF PE=1 SV=3	TRFE_HUMAN	swissprot_2012.fasta	77064.3	100.0%	17	22	23	0.164%	26.8%	SASDLTWDNLK	K	G	99.7%	65.1	29.2	46.8	1.37	0	1	0	0	2	1249.61			67140.4	454	464	Empty	true
Exp1_01	Serotransferrin OS=Homo sapiens GN=TF PE=1 SV=3	TRFE_HUMAN	swissprot_2012.fasta	77064.3	100.0%	17	22	23	0.164%	26.8%	SKEFQLFSSPHGK	K	D	99.7%	50.1	29.6	40.0	2.62	0	0	2	0	2	1491.76			40125	298	310	Empty	true
Exp1_01	Serotransferrin OS=Homo sapiens GN=TF PE=1 SV=3	TRFE_HUMAN	swissprot_2012.fasta	77064.3	100.0%	17	22	23	0.164%	26.8%	SMGGKEDLIWELLNQAQEHFGK	R	D	99.7%	37.0	30.3	37.0	2.60	0	0	1	1	2	2530.24			169967	274	295	Empty	true
Exp1_01	Serotransferrin OS=Homo sapiens GN=TF PE=1 SV=3	TRFE_HUMAN	swissprot_2012.fasta	77064.3	100.0%	17	22	23	0.164%	26.8%	SMGGKEDLIWELLNQAQEHFGKDK	R	S	99.7%	43.4	30.2	43.4	0.000	0	0	0	1	2	2773.36			239356	274	297	Empty	true
Exp1_01	Serotransferrin OS=Homo sapiens GN=TF PE=1 SV=3	TRFE_HUMAN	swissprot_2012.fasta	77064.3	100.0%	17	22	23	0.164%	26.8%	TAGWNIPMGLLYNK	R	I	99.7%	64.0	29.2	50.7	4.85	0	1	0	0	2	1577.81			70922.5	476	489	Empty	true
Exp1_01	Alpha-1-acid glycoprotein 2 OS=Homo sapiens GN=ORM2 PE=1 SV=2	A1AG2_HUMAN	swissprot_2012.fasta	23603.3	99.8%	2	2	2	0.0143%	9.45%	SDVMYTDWK	R	K	96.4%	21.9	25.0	21.9	1.77	0	1	0	0	2	1144.5			70597.7	171	179	Empty	true
Exp1_01	Alpha-1-acid glycoprotein 2 OS=Homo sapiens GN=ORM2 PE=1 SV=2	A1AG2_HUMAN	swissprot_2012.fasta	23603.3	99.8%	2	2	2	0.0143%	9.45%	SDVMYTDWKK	R	D	99.5%	28.7	26.3	28.7	1.34	0	0	1	0	2	1272.59			53410.5	171	180	Empty	true
Exp1_01	Alpha-1-acid glycoprotein 2 OS=Homo sapiens GN=ORM2 PE=1 SV=2	A1AG2_HUMAN	swissprot_2012.fasta	23603.3	99.8%	2	2	2	0.0143%	9.45%	WFYIASAFR	K	N	99.7%	39.5	29.1	39.5	2.85	0	1	0	0	2	1160.59			9198.69	43	51	Empty	false	A1AG1_HUMAN
Exp1_01	Alpha-1-antichymotrypsin OS=Homo sapiens GN=SERPINA3 PE=1 SV=2	AACT_HUMAN	swissprot_2012.fasta	47653	100.0%	5	5	5	0.0356%	15.1%	ADLSGITGAR	K	N	99.7%	82.7	28.6	61.6	0.000	0	1	0	0	2	9605110			16595.2	341	350	Empty	true
Exp1_01	Alpha-1-antichymotrypsin OS=Homo sapiens GN=SERPINA3 PE=1 SV=2	AACT_HUMAN	swissprot_2012.fasta	47653	100.0%	5	5	5	0.0356%	15.1%	AKWEMPFDPQDTHQSR	K	F	99.2%	26.2	27.8	8.63	1.47	0	0	0	1	2	1972.9			13624.7	215	230	Empty	true
Exp1_01	Alpha-1-antichymotrypsin OS=Homo sapiens GN=SERPINA3 PE=1 SV=2	AACT_HUMAN	swissprot_2012.fasta	47653	100.0%	5	5	5	0.0356%	15.1%	AVLDVFEEGTEASAATAVK	K	I	99.7%	106	30.0	95.0	6.72	0	1	0	0	2	1907.96			3790.54	361	379	Empty	true
Exp1_01	Alpha-1-antichymotrypsin OS=Homo sapiens GN=SERPINA3 PE=1 SV=2	AACT_HUMAN	swissprot_2012.fasta	47653	100.0%	5	5	5	0.0356%	15.1%	LYGSEAFATDFQDSAAAK	R	K	99.7%	86.5	28.4	75.1	5.92	0	1	0	0	2	1891.87			7877.59	160	177	Empty	true
Exp1_01	Alpha-1-antichymotrypsin OS=Homo sapiens GN=SERPINA3 PE=1 SV=2	AACT_HUMAN	swissprot_2012.fasta	47653	100.0%	5	5	5	0.0356%	15.1%	LYGSEAFATDFQDSAAAKK	R	L	99.4%	44.3	29.8	33.7	0.000	0	0	1	0	2	2019.97			25266.1	160	178	Empty	true
Exp1_01	Protein S100-A8 OS=Homo sapiens GN=S100A8 PE=1 SV=1	S10A8_HUMAN	swissprot_2012.fasta	10835	99.8%	2	3	3	0.0214%	19.4%	ALNSIIDVYHK	K	Y	99.7%	47.0	29.3	29.2	1.59	0	1	1	0	2	1272.69			21913.2	8	18	Empty	true
Exp1_01	Protein S100-A8 OS=Homo sapiens GN=S100A8 PE=1 SV=1	S10A8_HUMAN	swissprot_2012.fasta	10835	99.8%	2	3	3	0.0214%	19.4%	GADVWFK	K	E	98.7%	40.5	26.3	27.6	0.000	0	1	0	0	2	8224145			5997.61	50	56	Empty	true
Exp1_01	Cytoplasmic FMR1-interacting protein 1 OS=Homo sapiens GN=CYFIP1 PE=1 SV=1	CYFP1_HUMAN	swissprot_2012.fasta	145187	99.8%	2	2	2	0.0143%	1.76%	SCSRAIPQVK	R	C	96.3%	39.0	29.0	16.1	0.000	0	1	0	0	2	1188.6			4703.13	88	97	Empty	true
Exp1_01	Cytoplasmic FMR1-interacting protein 1 OS=Homo sapiens GN=CYFIP1 PE=1 SV=1	CYFP1_HUMAN	swissprot_2012.fasta	145187	99.8%	2	2	2	0.0143%	1.76%	YAPLHLVPLIER	K	L	99.7%	32.4	25.0	32.4	3.36	0	0	1	0	2	1420.83			5462.53	1054	1065	Empty	true
Exp1_01	Kininogen-1 OS=Homo sapiens GN=KNG1 PE=1 SV=2	KNG1_HUMAN	swissprot_2012.fasta	71957.6	100.0%	8	8	8	0.0570%	11.2%	AVDAALKK	K	Y	99.7%	42.6	25.8	16.3	3.77	0	1	0	0	2	8154986			13450.1	36	43	Empty	true
Exp1_01	Kininogen-1 OS=Homo sapiens GN=KNG1 PE=1 SV=2	KNG1_HUMAN	swissprot_2012.fasta	71957.6	100.0%	8	8	8	0.0570%	11.2%	GHGLGHGHEQQHGLGHGHK	R	F	99.7%	59.0	29.7	59.0	3.19	0	1	0	0	2	1979.94			2150.58	458	476	Empty	true
Exp1_01	Kininogen-1 OS=Homo sapiens GN=KNG1 PE=1 SV=2	KNG1_HUMAN	swissprot_2012.fasta	71957.6	100.0%	8	8	8	0.0570%	11.2%	HNLGHGHKHER	K	D	99.1%	32.5	29.3	32.5	2.34	0	1	0	0	2	1321.66			294564	439	449	Empty	true
Exp1_01	Kininogen-1 OS=Homo sapiens GN=KNG1 PE=1 SV=2	KNG1_HUMAN	swissprot_2012.fasta	71957.6	100.0%	8	8	8	0.0570%	11.2%	KHNLGHGHKHER	R	D	99.7%	44.2	29.0	44.2	4.14	0	1	0	0	2	1449.76			538905	438	449	Empty	true
Exp1_01	Kininogen-1 OS=Homo sapiens GN=KNG1 PE=1 SV=2	KNG1_HUMAN	swissprot_2012.fasta	71957.6	100.0%	8	8	8	0.0570%	11.2%	KYFIDFVAR	K	E	99.7%	47.4	29.4	47.4	1.85	0	1	0	0	2	1158.63			17906.2	316	324	Empty	true
Exp1_01	Kininogen-1 OS=Homo sapiens GN=KNG1 PE=1 SV=2	KNG1_HUMAN	swissprot_2012.fasta	71957.6	100.0%	8	8	8	0.0570%	11.2%	QVVAGLNFR	R	I	99.7%	47.7	26.5	31.2	0.000	0	1	0	0	2	1003.57			5862.49	188	196	Empty	true
Exp1_01	Kininogen-1 OS=Homo sapiens GN=KNG1 PE=1 SV=2	KNG1_HUMAN	swissprot_2012.fasta	71957.6	100.0%	8	8	8	0.0570%	11.2%	YFIDFVAR	K	E	99.7%	45.2	29.6	45.2	2.38	0	1	0	0	2	1030.54			5064.74	317	324	Empty	true
Exp1_01	Kininogen-1 OS=Homo sapiens GN=KNG1 PE=1 SV=2	KNG1_HUMAN	swissprot_2012.fasta	71957.6	100.0%	8	8	8	0.0570%	11.2%	YNSQNQSNNQFVLYR	K	I	99.7%	70.3	28.8	70.3	5.15	0	1	0	0	2	1874.88			2247.84	44	58	Empty	true
Exp1_01	Complement C1r subcomponent OS=Homo sapiens GN=C1R PE=1 SV=2	C1R_HUMAN	swissprot_2012.fasta	80119.6	100.0%	6	6	6	0.0428%	9.08%	GGGALLGDR	R	W	99.7%	56.7	27.3	18.2	0.000	0	1	0	0	2	8154372			35668.2	487	495	Empty	true
Exp1_01	Complement C1r subcomponent OS=Homo sapiens GN=C1R PE=1 SV=2	C1R_HUMAN	swissprot_2012.fasta	80119.6	100.0%	6	6	6	0.0428%	9.08%	MGNFPWQVFTNIHGR	K	G	99.7%	62.1	29.8	62.1	3.35	0	0	1	0	2	1803.87			25993	472	486	Empty	true
Exp1_01	Complement C1r subcomponent OS=Homo sapiens GN=C1R PE=1 SV=2	C1R_HUMAN	swissprot_2012.fasta	80119.6	100.0%	6	6	6	0.0428%	9.08%	VLNYVDWIK	K	K	99.7%	45.0	27.2	31.1	1.68	0	1	0	0	2	1149.63			27638.3	690	698	Empty	true
Exp1_01	Complement C1r subcomponent OS=Homo sapiens GN=C1R PE=1 SV=2	C1R_HUMAN	swissprot_2012.fasta	80119.6	100.0%	6	6	6	0.0428%	9.08%	VSVHPDYR	R	Q	99.7%	38.6	26.2	27.3	1.48	0	1	0	0	2	9724897			12811.8	540	547	Empty	true
Exp1_01	Complement C1r subcomponent OS=Homo sapiens GN=C1R PE=1 SV=2	C1R_HUMAN	swissprot_2012.fasta	80119.6	100.0%	6	6	6	0.0428%	9.08%	WILTAAHTLYPK	R	E	99.2%	31.0	27.3	0.000	2.28	0	1	0	0	2	1413.79			7914.84	496	507	Empty	true
Exp1_01	Complement C1r subcomponent OS=Homo sapiens GN=C1R PE=1 SV=2	C1R_HUMAN	swissprot_2012.fasta	80119.6	100.0%	6	6	6	0.0428%	9.08%	YTTTMGVNTYK	R	A	99.6%	28.7	27.3	28.7	3.42	0	1	0	0	2	1279.59			2841.22	389	399	Empty	true
Exp1_01	Complement factor H-related protein 5 OS=Homo sapiens GN=CFHR5 PE=1 SV=1	FHR5_HUMAN	swissprot_2012.fasta	64418.3	99.9%	2	2	2	0.0143%	5.62%	HSVCINGK	R	W	97.5%	24.4	25.0	1.08	2.00	0	1	0	0	2	9154353			5165.98	367	374	Empty	true
Exp1_01	Complement factor H-related protein 5 OS=Homo sapiens GN=CFHR5 PE=1 SV=1	FHR5_HUMAN	swissprot_2012.fasta	64418.3	99.9%	2	2	2	0.0143%	5.62%	KEEYGHNEVVEYDCNPNFIINGPK	R	K	99.7%	35.0	28.7	22.2	2.51	0	0	0	1	2	2866.3			21977	224	247	Empty	true
Exp1_01	IgGFc-binding protein OS=Homo sapiens GN=FCGBP PE=1 SV=3	FCGBP_HUMAN	swissprot_2012.fasta	571983	100.0%	15	17	17	0.121%	3.42%	ASQHGSDVVIETDFGLR	R	V	99.7%	40.4	29.6	40.4	3.06	0	0	1	0	2	1830.9			12429.7	1349	1365	Empty	true
Exp1_01	IgGFc-binding protein OS=Homo sapiens GN=FCGBP PE=1 SV=3	FCGBP_HUMAN	swissprot_2012.fasta	571983	100.0%	15	17	17	0.121%	3.42%	FAVLQENVAWGNGR	R	V	99.7%	77.4	30.0	66.6	3.38	0	2	0	0	2	1560.79			24070.6	1291	1304	Empty	true
Exp1_01	IgGFc-binding protein OS=Homo sapiens GN=FCGBP PE=1 SV=3	FCGBP_HUMAN	swissprot_2012.fasta	571983	100.0%	15	17	17	0.121%	3.42%	GATTSPGVYELSSR	R	C	99.7%	81.3	29.2	70.7	5.80	0	1	0	0	2	1424.7			31517.4	5251	5264	Empty	true
Exp1_01	IgGFc-binding protein OS=Homo sapiens GN=FCGBP PE=1 SV=3	FCGBP_HUMAN	swissprot_2012.fasta	571983	100.0%	15	17	17	0.121%	3.42%	GEVGFVLVDNQR	R	S	99.7%	48.9	30.0	48.9	2.31	0	1	0	0	2	1332.69			20236.8	545	556	Empty	true
Exp1_01	IgGFc-binding protein OS=Homo sapiens GN=FCGBP PE=1 SV=3	FCGBP_HUMAN	swissprot_2012.fasta	571983	100.0%	15	17	17	0.121%	3.42%	GSQAVSYTR	R	S	99.7%	53.1	26.6	33.2	1.60	0	1	0	0	2	9684795			10937.2	2122	2130	Empty	true
Exp1_01	IgGFc-binding protein OS=Homo sapiens GN=FCGBP PE=1 SV=3	FCGBP_HUMAN	swissprot_2012.fasta	571983	100.0%	15	17	17	0.121%	3.42%	GSQTVSYTR	R	A	99.7%	64.1	27.2	52.3	4.16	0	1	0	0	2	9984901			17275.9	913	921	Empty	true
Exp1_01	IgGFc-binding protein OS=Homo sapiens GN=FCGBP PE=1 SV=3	FCGBP_HUMAN	swissprot_2012.fasta	571983	100.0%	15	17	17	0.121%	3.42%	LASVSVSR	K	T	99.7%	47.3	26.6	34.9	1.48	0	1	0	0	2	8184729			11533.6	5325	5332	Empty	true
Exp1_01	IgGFc-binding protein OS=Homo sapiens GN=FCGBP PE=1 SV=3	FCGBP_HUMAN	swissprot_2012.fasta	571983	100.0%	15	17	17	0.121%	3.42%	LPVVLANGQIR	K	A	99.2%	24.1	25.0	24.1	2.82	0	1	0	0	2	1179.72			7860.83	1338	1348	Empty	true
Exp1_01	IgGFc-binding protein OS=Homo sapiens GN=FCGBP PE=1 SV=3	FCGBP_HUMAN	swissprot_2012.fasta	571983	100.0%	15	17	17	0.121%	3.42%	SRLPVSLSEGR	R	L	99.7%	45.2	29.2	32.2	2.80	0	1	0	0	2	1200.67			1719.08	557	567	Empty	true
Exp1_01	IgGFc-binding protein OS=Homo sapiens GN=FCGBP PE=1 SV=3	FCGBP_HUMAN	swissprot_2012.fasta	571983	100.0%	15	17	17	0.121%	3.42%	VAVIVSNDHAGK	K	L	98.2%	28.4	27.2	28.4	2.17	0	1	0	0	2	1209.66			3261.96	5356	5367	Empty	true
Exp1_01	IgGFc-binding protein OS=Homo sapiens GN=FCGBP PE=1 SV=3	FCGBP_HUMAN	swissprot_2012.fasta	571983	100.0%	15	17	17	0.121%	3.42%	VAYDLVYYVR	R	V	99.7%	67.8	29.7	67.8	5.48	0	1	0	0	2	1260.66			9172.94	1366	1375	Empty	true
Exp1_01	IgGFc-binding protein OS=Homo sapiens GN=FCGBP PE=1 SV=3	FCGBP_HUMAN	swissprot_2012.fasta	571983	100.0%	15	17	17	0.121%	3.42%	VLVENEHR	R	G	99.7%	34.7	25.9	8.11	2.92	0	1	0	0	2	9955268			5556.7	905	912	Empty	true
Exp1_01	IgGFc-binding protein OS=Homo sapiens GN=FCGBP PE=1 SV=3	FCGBP_HUMAN	swissprot_2012.fasta	571983	100.0%	15	17	17	0.121%	3.42%	VNGVLTALPVSVADGR	R	I	99.7%	62.0	26.5	50.6	3.64	0	2	0	0	2	1568.86			14973.5	1756	1771	Empty	true
Exp1_01	IgGFc-binding protein OS=Homo sapiens GN=FCGBP PE=1 SV=3	FCGBP_HUMAN	swissprot_2012.fasta	571983	100.0%	15	17	17	0.121%	3.42%	VTLQPYNVAQLQSSVDLSGSK	R	V	99.7%	53.7	28.6	41.6	1.89	0	0	1	0	2	2234.17			5556.94	193	213	Empty	true
Exp1_01	IgGFc-binding protein OS=Homo sapiens GN=FCGBP PE=1 SV=3	FCGBP_HUMAN	swissprot_2012.fasta	571983	100.0%	15	17	17	0.121%	3.42%	YDLAFVVASQATK	R	L	99.7%	88.8	28.1	64.4	4.44	0	1	0	0	2	1412.74			6564.79	263	275	Empty	true
Exp1_01	Plasma protease C1 inhibitor OS=Homo sapiens GN=SERPING1 PE=1 SV=2	IC1_HUMAN	swissprot_2012.fasta	55155.5	100.0%	10	11	12	0.0855%	19.8%	FPVFMGR	K	V	98.8%	27.4	25.0	10.6	1.77	0	1	0	0	2	8534389			10703	488	494	Empty	true
Exp1_01	Plasma protease C1 inhibitor OS=Homo sapiens GN=SERPING1 PE=1 SV=2	IC1_HUMAN	swissprot_2012.fasta	55155.5	100.0%	10	11	12	0.0855%	19.8%	FQPTLLTLPR	K	I	99.7%	35.1	25.8	24.9	2.59	0	1	0	0	2	1185.7			7871.27	391	400	Empty	true
Exp1_01	Plasma protease C1 inhibitor OS=Homo sapiens GN=SERPING1 PE=1 SV=2	IC1_HUMAN	swissprot_2012.fasta	55155.5	100.0%	10	11	12	0.0855%	19.8%	GVTSVSQIFHSPDLAIR	K	D	99.7%	63.7	28.0	41.0	4.28	0	1	1	0	2	1826.98			22235.2	217	233	Empty	true
Exp1_01	Plasma protease C1 inhibitor OS=Homo sapiens GN=SERPING1 PE=1 SV=2	IC1_HUMAN	swissprot_2012.fasta	55155.5	100.0%	10	11	12	0.0855%	19.8%	HRLEDMEQALSPSVFK	K	A	99.1%	30.7	29.9	30.7	2.33	0	0	1	0	2	1886.94			109373	365	380	Empty	true
Exp1_01	Plasma protease C1 inhibitor OS=Homo sapiens GN=SERPING1 PE=1 SV=2	IC1_HUMAN	swissprot_2012.fasta	55155.5	100.0%	10	11	12	0.0855%	19.8%	IKVTTSQDMLSIMEK	R	L	99.7%	39.4	28.8	29.3	1.80	0	0	1	0	2	1723.9			16700.6	401	415	Empty	true
Exp1_01	Plasma protease C1 inhibitor OS=Homo sapiens GN=SERPING1 PE=1 SV=2	IC1_HUMAN	swissprot_2012.fasta	55155.5	100.0%	10	11	12	0.0855%	19.8%	KYPVAHFIDQTLK	K	A	99.7%	37.0	27.9	23.4	1.70	0	0	1	0	2	1559.86			12261.9	329	341	Empty	true
Exp1_01	Plasma protease C1 inhibitor OS=Homo sapiens GN=SERPING1 PE=1 SV=2	IC1_HUMAN	swissprot_2012.fasta	55155.5	100.0%	10	11	12	0.0855%	19.8%	LEDMEQALSPSVFK	R	A	99.7%	71.6	30.1	53.0	5.51	0	1	0	0	2	1593.78			6953.57	367	380	Empty	true
Exp1_01	Plasma protease C1 inhibitor OS=Homo sapiens GN=SERPING1 PE=1 SV=2	IC1_HUMAN	swissprot_2012.fasta	55155.5	100.0%	10	11	12	0.0855%	19.8%	LLDSLPSDTR	R	L	99.7%	57.2	29.8	37.5	1.46	0	1	0	0	2	1116.59			41224.9	277	286	Empty	true
Exp1_01	Plasma protease C1 inhibitor OS=Homo sapiens GN=SERPING1 PE=1 SV=2	IC1_HUMAN	swissprot_2012.fasta	55155.5	100.0%	10	11	12	0.0855%	19.8%	TNLESILSYPK	K	D	99.7%	80.4	27.5	61.5	3.17	0	2	0	0	2	1264.68			15230.8	191	201	Empty	true
Exp1_01	Plasma protease C1 inhibitor OS=Homo sapiens GN=SERPING1 PE=1 SV=2	IC1_HUMAN	swissprot_2012.fasta	55155.5	100.0%	10	11	12	0.0855%	19.8%	VTTSQDMLSIMEK	K	L	99.7%	71.8	28.7	54.8	3.00	0	1	0	0	2	1482.72			29521.1	403	415	Empty	true
Exp1_01	Ig heavy chain V-III region GAL OS=Homo sapiens PE=1 SV=1	HV320_HUMAN	swissprot_2012.fasta	12726.1	100.0%	3	5	6	0.0428%	31.0%	EVQLVESGGDLVQPGR	-	S	99.7%	90.8	28.9	74.6	2.74	0	1	0	0	2	1682.87			7094.43	1	16	Empty	true
Exp1_01	Ig heavy chain V-III region GAL OS=Homo sapiens PE=1 SV=1	HV320_HUMAN	swissprot_2012.fasta	12726.1	100.0%	3	5	6	0.0428%	31.0%	GLEWVANIK	K	Z	99.7%	55.0	29.9	27.0	2.59	0	2	0	0	2	1030.56			26697.2	44	52	Empty	true
Exp1_01	Ig heavy chain V-III region GAL OS=Homo sapiens PE=1 SV=1	HV320_HUMAN	swissprot_2012.fasta	12726.1	100.0%	3	5	6	0.0428%	31.0%	NSLYLQMNSLR	K	V	99.7%	59.3	28.2	15.5	4.37	0	3	0	0	2	1338.68			80976.5	77	87	Empty	true
Exp1_01	Keratin type I cytoskeletal 16 OS=Homo sapiens GN=KRT16 PE=1 SV=4	K1C16_HUMAN	swissprot_2012.fasta	51269	100.0%	4	4	4	0.0285%	23.5%	ALEEANADLEVK	R	I	99.7%	84.4	29.2	60.6	3.05	0	1	0	0	2	1301.66			6050.29	137	148	Empty	false	K1C14_HUMANK1C13_HUMAN
Exp1_01	Keratin type I cytoskeletal 16 OS=Homo sapiens GN=KRT16 PE=1 SV=4	K1C16_HUMAN	swissprot_2012.fasta	51269	100.0%	4	4	4	0.0285%	23.5%	APSTYGGGLSVSSR	R	F	99.7%	73.9	28.7	73.9	2.17	0	1	0	0	2	1338.66			7209.24	42	55	Empty	true
Exp1_01	Keratin type I cytoskeletal 16 OS=Homo sapiens GN=KRT16 PE=1 SV=4	K1C16_HUMAN	swissprot_2012.fasta	51269	100.0%	4	4	4	0.0285%	23.5%	ASLENSLEETK	K	G	99.7%	66.1	28.9	54.7	2.82	0	1	0	0	2	1220.6			33265.7	355	365	Empty	false	K1C14_HUMAN
Exp1_01	Keratin type I cytoskeletal 16 OS=Homo sapiens GN=KRT16 PE=1 SV=4	K1C16_HUMAN	swissprot_2012.fasta	51269	100.0%	4	4	4	0.0285%	23.5%	ASLENSLEETKGR	K	Y	99.7%	50.6	29.8	35.4	0.000	0	0	1	0	2	1433.72			21176	355	367	Empty	false	K1C14_HUMAN
Exp1_01	Keratin type I cytoskeletal 16 OS=Homo sapiens GN=KRT16 PE=1 SV=4	K1C16_HUMAN	swissprot_2012.fasta	51269	100.0%	4	4	4	0.0285%	23.5%	DAETWFLSK	R	T	99.7%	43.8	26.7	43.8	2.15	0	1	0	0	2	1096.53			8945.93	303	311	Empty	true
Exp1_01	Keratin type I cytoskeletal 16 OS=Homo sapiens GN=KRT16 PE=1 SV=4	K1C16_HUMAN	swissprot_2012.fasta	51269	100.0%	4	4	4	0.0285%	23.5%	ILNEMRDQYEQMAEK	R	N	99.4%	43.2	28.9	28.9	0.000	0	0	1	0	2	1897.88			12609.6	285	299	Empty	true
Exp1_01	Keratin type I cytoskeletal 16 OS=Homo sapiens GN=KRT16 PE=1 SV=4	K1C16_HUMAN	swissprot_2012.fasta	51269	100.0%	4	4	4	0.0285%	23.5%	LASYLDK	R	V	99.7%	46.7	25.0	36.0	0.000	0	1	0	0	2	8094404			60751.9	128	134	Empty	false	K1C10_HUMANK1C17_HUMANK1C14_HUMANK1C9_HUMAN
Exp1_01	Keratin type I cytoskeletal 16 OS=Homo sapiens GN=KRT16 PE=1 SV=4	K1C16_HUMAN	swissprot_2012.fasta	51269	100.0%	4	4	4	0.0285%	23.5%	LASYLDKVR	R	A	99.7%	49.2	25.3	34.8	2.54	0	1	0	0	2	1064.61			49147.2	128	136	Empty	false	K1C10_HUMANK1C17_HUMANK1C14_HUMAN
Exp1_01	Keratin type I cytoskeletal 16 OS=Homo sapiens GN=KRT16 PE=1 SV=4	K1C16_HUMAN	swissprot_2012.fasta	51269	100.0%	4	4	4	0.0285%	23.5%	LEQEIATYR	R	R	99.7%	59.5	28.1	40.5	2.27	0	1	0	0	2	1122.58			10902.3	410	418	Empty	false	K1C17_HUMANK1C14_HUMANK1C13_HUMAN
Exp1_01	Keratin type I cytoskeletal 16 OS=Homo sapiens GN=KRT16 PE=1 SV=4	K1C16_HUMAN	swissprot_2012.fasta	51269	100.0%	4	4	4	0.0285%	23.5%	TKYEHELALR	R	Q	99.7%	50.3	29.4	36.8	0.000	0	0	1	0	2	1259.67			18623.5	204	213	Empty	true
Exp1_01	Keratin type I cytoskeletal 16 OS=Homo sapiens GN=KRT16 PE=1 SV=4	K1C16_HUMAN	swissprot_2012.fasta	51269	100.0%	4	4	4	0.0285%	23.5%	TRLEQEIATYR	K	R	99.5%	31.4	28.7	12.7	2.80	0	0	1	0	2	1379.73			17750.5	408	418	Empty	false	K1C17_HUMANK1C14_HUMANK1C13_HUMAN
Exp1_01	Keratin type I cytoskeletal 16 OS=Homo sapiens GN=KRT16 PE=1 SV=4	K1C16_HUMAN	swissprot_2012.fasta	51269	100.0%	4	4	4	0.0285%	23.5%	VLDELTLAR	R	T	99.7%	53.4	26.2	33.0	1.59	0	1	0	0	2	1029.59			80102.3	226	234	Empty	false	K1C17_HUMANK1C14_HUMAN
Exp1_01	Keratin type I cytoskeletal 16 OS=Homo sapiens GN=KRT16 PE=1 SV=4	K1C16_HUMAN	swissprot_2012.fasta	51269	100.0%	4	4	4	0.0285%	23.5%	VTMQNLNDR	K	L	99.7%	79.0	29.4	56.9	2.17	0	2	0	0	2	1090.53			128479	119	127	Empty	false	K1C10_HUMANK1C14_HUMAN
Exp1_01	Keratin type I cytoskeletal 14 OS=Homo sapiens GN=KRT14 PE=1 SV=4	K1C14_HUMAN	swissprot_2012.fasta	51562.5	100.0%	10	10	10	0.0713%	26.1%	ALEEANADLEVK	R	I	99.7%	84.4	29.2	60.6	3.05	0	1	0	0	2	1301.66			6050.29	135	146	Empty	true	K1C16_HUMANK1C13_HUMAN
Exp1_01	Keratin type I cytoskeletal 14 OS=Homo sapiens GN=KRT14 PE=1 SV=4	K1C14_HUMAN	swissprot_2012.fasta	51562.5	100.0%	10	10	10	0.0713%	26.1%	APSTYGGGLSVSSSR	R	F	99.7%	96.6	28.9	96.6	3.80	0	1	0	0	2	1425.7			15662.3	42	56	Empty	true
Exp1_01	Keratin type I cytoskeletal 14 OS=Homo sapiens GN=KRT14 PE=1 SV=4	K1C14_HUMAN	swissprot_2012.fasta	51562.5	100.0%	10	10	10	0.0713%	26.1%	ASLENSLEETK	K	G	99.7%	66.1	28.9	54.7	2.82	0	1	0	0	2	1220.6			33265.7	353	363	Empty	true	K1C16_HUMAN
Exp1_01	Keratin type I cytoskeletal 14 OS=Homo sapiens GN=KRT14 PE=1 SV=4	K1C14_HUMAN	swissprot_2012.fasta	51562.5	100.0%	10	10	10	0.0713%	26.1%	ASLENSLEETKGR	K	Y	99.7%	50.6	29.8	35.4	0.000	0	0	1	0	2	1433.72			21176	353	365	Empty	true	K1C16_HUMAN
Exp1_01	Keratin type I cytoskeletal 14 OS=Homo sapiens GN=KRT14 PE=1 SV=4	K1C14_HUMAN	swissprot_2012.fasta	51562.5	100.0%	10	10	10	0.0713%	26.1%	EVATNSELVQSGK	R	S	99.7%	91.4	30.3	77.5	4.57	0	1	0	0	2	1361.69			13711.5	316	328	Empty	true	K1C17_HUMAN
Exp1_01	Keratin type I cytoskeletal 14 OS=Homo sapiens GN=KRT14 PE=1 SV=4	K1C14_HUMAN	swissprot_2012.fasta	51562.5	100.0%	10	10	10	0.0713%	26.1%	LASYLDK	R	V	99.7%	46.7	25.0	36.0	0.000	0	1	0	0	2	8094404			60751.9	126	132	Empty	false	K1C10_HUMANK1C17_HUMANK1C16_HUMANK1C9_HUMAN
Exp1_01	Keratin type I cytoskeletal 14 OS=Homo sapiens GN=KRT14 PE=1 SV=4	K1C14_HUMAN	swissprot_2012.fasta	51562.5	100.0%	10	10	10	0.0713%	26.1%	LASYLDKVR	R	A	99.7%	49.2	25.3	34.8	2.54	0	1	0	0	2	1064.61			49147.2	126	134	Empty	false	K1C10_HUMANK1C17_HUMANK1C16_HUMAN
Exp1_01	Keratin type I cytoskeletal 14 OS=Homo sapiens GN=KRT14 PE=1 SV=4	K1C14_HUMAN	swissprot_2012.fasta	51562.5	100.0%	10	10	10	0.0713%	26.1%	LEQEIATYR	R	R	99.7%	59.5	28.1	40.5	2.27	0	1	0	0	2	1122.58			10902.3	408	416	Empty	true	K1C17_HUMANK1C16_HUMANK1C13_HUMAN
Exp1_01	Keratin type I cytoskeletal 14 OS=Homo sapiens GN=KRT14 PE=1 SV=4	K1C14_HUMAN	swissprot_2012.fasta	51562.5	100.0%	10	10	10	0.0713%	26.1%	LLEGEDAHLSSSQFSSGSQSSR	R	D	99.7%	57.8	28.7	57.8	3.82	0	0	1	0	2	2309.06			7088.26	418	439	Empty	true
Exp1_01	Keratin type I cytoskeletal 14 OS=Homo sapiens GN=KRT14 PE=1 SV=4	K1C14_HUMAN	swissprot_2012.fasta	51562.5	100.0%	10	10	10	0.0713%	26.1%	NHEEEMNALR	K	G	99.4%	29.9	25.0	29.9	1.89	0	1	0	0	2	1242.55			22177.6	252	261	Empty	true	K1C17_HUMAN
Exp1_01	Keratin type I cytoskeletal 14 OS=Homo sapiens GN=KRT14 PE=1 SV=4	K1C14_HUMAN	swissprot_2012.fasta	51562.5	100.0%	10	10	10	0.0713%	26.1%	TRLEQEIATYR	K	R	99.5%	31.4	28.7	12.7	2.80	0	0	1	0	2	1379.73			17750.5	406	416	Empty	true	K1C17_HUMANK1C16_HUMANK1C13_HUMAN
Exp1_01	Keratin type I cytoskeletal 14 OS=Homo sapiens GN=KRT14 PE=1 SV=4	K1C14_HUMAN	swissprot_2012.fasta	51562.5	100.0%	10	10	10	0.0713%	26.1%	VLDELTLAR	R	A	99.7%	53.4	26.2	33.0	1.59	0	1	0	0	2	1029.59			80102.3	224	232	Empty	true	K1C17_HUMANK1C16_HUMAN
Exp1_01	Keratin type I cytoskeletal 14 OS=Homo sapiens GN=KRT14 PE=1 SV=4	K1C14_HUMAN	swissprot_2012.fasta	51562.5	100.0%	10	10	10	0.0713%	26.1%	VTMQNLNDR	K	L	99.7%	79.0	29.4	56.9	2.17	0	2	0	0	2	1090.53			128479	117	125	Empty	false	K1C10_HUMANK1C16_HUMAN
Exp1_01	Band 3 anion transport protein OS=Homo sapiens GN=SLC4A1 PE=1 SV=3	B3AT_HUMAN	swissprot_2012.fasta	101796	100.0%	5	5	5	0.0356%	7.14%	AAATLMSER	R	V	99.7%	70.6	28.8	53.6	3.77	0	1	0	0	2	9494771			15649.6	284	292	Empty	true
Exp1_01	Band 3 anion transport protein OS=Homo sapiens GN=SLC4A1 PE=1 SV=3	B3AT_HUMAN	swissprot_2012.fasta	101796	100.0%	5	5	5	0.0356%	7.14%	HSHAGELEALGGVKPAVLTR	K	S	99.7%	84.1	26.8	69.3	1.96	0	0	0	1	2	2042.11			7809.55	161	180	Empty	true
Exp1_01	Band 3 anion transport protein OS=Homo sapiens GN=SLC4A1 PE=1 SV=3	B3AT_HUMAN	swissprot_2012.fasta	101796	100.0%	5	5	5	0.0356%	7.14%	IDAYMAQSR	R	G	99.7%	53.6	25.6	53.6	3.15	0	1	0	0	2	1054.5			23813	296	304	Empty	true
Exp1_01	Band 3 anion transport protein OS=Homo sapiens GN=SLC4A1 PE=1 SV=3	B3AT_HUMAN	swissprot_2012.fasta	101796	100.0%	5	5	5	0.0356%	7.14%	SVTHANALTVMGK	R	A	99.7%	60.3	28.9	60.3	7.57	0	1	0	0	2	1328.7			10622.6	731	743	Empty	true
Exp1_01	Band 3 anion transport protein OS=Homo sapiens GN=SLC4A1 PE=1 SV=3	B3AT_HUMAN	swissprot_2012.fasta	101796	100.0%	5	5	5	0.0356%	7.14%	YQSSPAKPDSSFYK	R	G	99.1%	32.2	28.8	32.2	2.11	0	1	0	0	2	1604.76			1680.97	347	360	Empty	true
Exp1_01	Coagulation factor XII OS=Homo sapiens GN=F12 PE=1 SV=3	FA12_HUMAN	swissprot_2012.fasta	67790.6	99.8%	2	2	2	0.0143%	2.76%	EQPPSLTR	R	N	96.2%	24.3	25.5	24.3	1.55	0	1	0	0	2	9274895			9474.28	346	353	Empty	true
Exp1_01	Coagulation factor XII OS=Homo sapiens GN=F12 PE=1 SV=3	FA12_HUMAN	swissprot_2012.fasta	67790.6	99.8%	2	2	2	0.0143%	2.76%	VVGGLVALR	R	G	97.2%	36.1	25.0	11.7	0.000	0	1	0	0	2	8835724			9233.27	373	381	Empty	true
Exp1_01	Glyceraldehyde-3-phosphate dehydrogenase OS=Homo sapiens GN=GAPDH PE=1 SV=3	G3P_HUMAN	swissprot_2012.fasta	36053.4	100.0%	6	8	8	0.0570%	27.2%	LEKPAKYDDIKK	R	V	96.8%	22.5	25.6	11.1	1.74	0	0	1	0	2	1447.82			3173.61	249	260	Empty	true
Exp1_01	Glyceraldehyde-3-phosphate dehydrogenase OS=Homo sapiens GN=GAPDH PE=1 SV=3	G3P_HUMAN	swissprot_2012.fasta	36053.4	100.0%	6	8	8	0.0570%	27.2%	LISWYDNEFGYSNR	K	V	99.7%	94.0	28.3	94.0	3.51	0	1	0	0	2	1763.8			7481.13	310	323	Empty	true
Exp1_01	Glyceraldehyde-3-phosphate dehydrogenase OS=Homo sapiens GN=GAPDH PE=1 SV=3	G3P_HUMAN	swissprot_2012.fasta	36053.4	100.0%	6	8	8	0.0570%	27.2%	VGVNGFGR	K	I	99.7%	33.9	25.7	22.6	1.49	0	1	0	0	2	8064156			23972.8	6	13	Empty	true
Exp1_01	Glyceraldehyde-3-phosphate dehydrogenase OS=Homo sapiens GN=GAPDH PE=1 SV=3	G3P_HUMAN	swissprot_2012.fasta	36053.4	100.0%	6	8	8	0.0570%	27.2%	VIHDNFGIVEGLMTTVHAITATQK	K	T	99.7%	81.2	27.5	81.2	5.15	0	0	1	1	2	2595.36			57576	163	186	Empty	true
Exp1_01	Glyceraldehyde-3-phosphate dehydrogenase OS=Homo sapiens GN=GAPDH PE=1 SV=3	G3P_HUMAN	swissprot_2012.fasta	36053.4	100.0%	6	8	8	0.0570%	27.2%	VIISAPSADAPMFVMGVNHEK	R	Y	99.3%	29.9	30.1	29.9	3.03	0	0	1	0	2	2213.11			16071.1	119	139	Empty	true
Exp1_01	Glyceraldehyde-3-phosphate dehydrogenase OS=Homo sapiens GN=GAPDH PE=1 SV=3	G3P_HUMAN	swissprot_2012.fasta	36053.4	100.0%	6	8	8	0.0570%	27.2%	VVDLMAHMASKE	R	-	99.7%	62.1	28.6	62.1	6.07	0	1	1	0	2	1330.65			110093	324	335	Empty	true
Exp1_01	Ig gamma-2 chain C region OS=Homo sapiens GN=IGHG2 PE=1 SV=2	IGHG2_HUMAN	swissprot_2012.fasta	35899.2	99.8%	2	5	6	0.0428%	22.4%	DTLMISR	K	T	99.1%	43.8	28.1	15.9	0.000	0	2	0	0	2	8354343			598934	128	134	Empty	false	IGHG1_HUMANIGHG3_HUMAN
Exp1_01	Ig gamma-2 chain C region OS=Homo sapiens GN=IGHG2 PE=1 SV=2	IGHG2_HUMAN	swissprot_2012.fasta	35899.2	99.8%	2	5	6	0.0428%	22.4%	EPQVYTLPPSREEMTK	R	N	99.7%	60.0	30.2	60.0	6.89	0	5	1	0	2	1904.94			74050.9	224	239	Empty	false	IGHG3_HUMAN
Exp1_01	Ig gamma-2 chain C region OS=Homo sapiens GN=IGHG2 PE=1 SV=2	IGHG2_HUMAN	swissprot_2012.fasta	35899.2	99.8%	2	5	6	0.0428%	22.4%	FNWYVDGVEVHNAK	Q	T	99.7%	75.2	29.4	75.2	8.12	0	2	3	0	1	1677.8			1087850	154	167	Empty	false	IGHG1_HUMAN
Exp1_01	Ig gamma-2 chain C region OS=Homo sapiens GN=IGHG2 PE=1 SV=2	IGHG2_HUMAN	swissprot_2012.fasta	35899.2	99.8%	2	5	6	0.0428%	22.4%	TTPPMLDSDGSFFLYSK	K	L	99.7%	52.6	29.3	52.6	5.29	0	1	0	0	2	1905.89			161173	272	288	Empty	false	IGHG3_HUMAN
Exp1_01	Ig gamma-2 chain C region OS=Homo sapiens GN=IGHG2 PE=1 SV=2	IGHG2_HUMAN	swissprot_2012.fasta	35899.2	99.8%	2	5	6	0.0428%	22.4%	VVSVLTVVHQDWLNGK	R	E	99.7%	65.7	25.4	65.7	7.00	0	1	3	0	2	1793.99			872634	181	196	Empty	true
Exp1_01	Ig gamma-2 chain C region OS=Homo sapiens GN=IGHG2 PE=1 SV=2	IGHG2_HUMAN	swissprot_2012.fasta	35899.2	99.8%	2	5	6	0.0428%	22.4%	VVSVLTVVHQDWLNGKEYK	R	C	99.7%	66.6	27.9	8.16	2.19	0	0	1	1	2	2215.18			270551	181	199	Empty	true
Exp1_01	Peptidyl-prolyl cis-trans isomerase A OS=Homo sapiens GN=PPIA PE=1 SV=2	PPIA_HUMAN	swissprot_2012.fasta	18012.9	100.0%	5	5	5	0.0356%	38.8%	EGMNIVEAMER	K	F	97.2%	38.1	27.0	21.6	0.000	0	1	0	0	2	1278.58			12491.6	134	144	Empty	true
Exp1_01	Peptidyl-prolyl cis-trans isomerase A OS=Homo sapiens GN=PPIA PE=1 SV=2	PPIA_HUMAN	swissprot_2012.fasta	18012.9	100.0%	5	5	5	0.0356%	38.8%	HTGPGILSMANAGPNTNGSQFFICTAK	K	T	99.7%	33.2	29.8	33.2	4.06	0	0	1	0	2	2792.31			3217.38	92	118	Empty	true
Exp1_01	Peptidyl-prolyl cis-trans isomerase A OS=Homo sapiens GN=PPIA PE=1 SV=2	PPIA_HUMAN	swissprot_2012.fasta	18012.9	100.0%	5	5	5	0.0356%	38.8%	SIYGEKFEDENFILK	K	H	99.0%	30.2	30.0	20.0	1.52	0	0	1	0	2	1831.91			8825.06	77	91	Empty	true
Exp1_01	Peptidyl-prolyl cis-trans isomerase A OS=Homo sapiens GN=PPIA PE=1 SV=2	PPIA_HUMAN	swissprot_2012.fasta	18012.9	100.0%	5	5	5	0.0356%	38.8%	VKEGMNIVEAMER	K	F	99.7%	43.7	29.7	21.8	2.36	0	0	1	0	2	1505.75			21486.7	132	144	Empty	true
Exp1_01	Peptidyl-prolyl cis-trans isomerase A OS=Homo sapiens GN=PPIA PE=1 SV=2	PPIA_HUMAN	swissprot_2012.fasta	18012.9	100.0%	5	5	5	0.0356%	38.8%	VSFELFADK	R	V	99.7%	55.3	26.0	42.6	2.92	0	1	0	0	2	1055.54			4223.39	20	28	Empty	true
Exp1_01	Coagulation factor XIII A chain OS=Homo sapiens GN=F13A1 PE=1 SV=4	F13A_HUMAN	swissprot_2012.fasta	83267.3	100.0%	3	4	4	0.0285%	5.60%	FQEGQEEER	K	L	97.3%	36.3	25.0	15.9	0.000	0	1	0	0	2	1151.5			11449	484	492	Empty	true
Exp1_01	Coagulation factor XIII A chain OS=Homo sapiens GN=F13A1 PE=1 SV=4	F13A_HUMAN	swissprot_2012.fasta	83267.3	100.0%	3	4	4	0.0285%	5.60%	KDGTHVVENVDATHIGK	K	L	99.7%	52.3	30.2	37.8	0.000	0	0	1	1	2	1819.93			15854	447	463	Empty	true
Exp1_01	Coagulation factor XIII A chain OS=Homo sapiens GN=F13A1 PE=1 SV=4	F13A_HUMAN	swissprot_2012.fasta	83267.3	100.0%	3	4	4	0.0285%	5.60%	QIGGDGMMDITDTYK	K	F	99.7%	72.9	25.5	72.9	6.72	0	1	0	0	2	1644.72			4717.67	469	483	Empty	true
Exp1_01	Leucine-rich alpha-2-glycoprotein OS=Homo sapiens GN=LRG1 PE=1 SV=2	A2GL_HUMAN	swissprot_2012.fasta	38179.7	99.8%	2	2	2	0.0143%	4.90%	GPLQLER	R	L	99.7%	42.0	25.0	13.1	1.68	0	1	0	0	2	8124626			5637.79	210	216	Empty	true
Exp1_01	Leucine-rich alpha-2-glycoprotein OS=Homo sapiens GN=LRG1 PE=1 SV=2	A2GL_HUMAN	swissprot_2012.fasta	38179.7	99.8%	2	2	2	0.0143%	4.90%	VAAGAFQGLR	R	Q	99.7%	56.8	27.5	35.2	1.70	0	1	0	0	2	9895527			3970.69	251	260	Empty	true
Exp1_01	Hemoglobin subunit beta OS=Homo sapiens GN=HBB PE=1 SV=2	HBB_HUMAN	swissprot_2012.fasta	15998	100.0%	9	11	12	0.0855%	69.4%	EFTPPVQAAYQK	K	V	99.7%	59.1	28.8	45.1	4.49	0	2	0	0	2	1378.7			54455	122	133	Empty	true
Exp1_01	Hemoglobin subunit beta OS=Homo sapiens GN=HBB PE=1 SV=2	HBB_HUMAN	swissprot_2012.fasta	15998	100.0%	9	11	12	0.0855%	69.4%	FFESFGDLSTPDAVMGNPK	R	V	99.7%	72.5	28.8	72.5	4.06	0	1	0	0	2	2058.95			3052.69	42	60	Empty	true
Exp1_01	Hemoglobin subunit beta OS=Homo sapiens GN=HBB PE=1 SV=2	HBB_HUMAN	swissprot_2012.fasta	15998	100.0%	9	11	12	0.0855%	69.4%	KVLGAFSDGLAHLDNLK	K	G	99.7%	68.6	26.9	68.6	3.49	0	0	1	1	2	1797.99			141774	67	83	Empty	true	HBD_HUMAN
Exp1_01	Hemoglobin subunit beta OS=Homo sapiens GN=HBB PE=1 SV=2	HBB_HUMAN	swissprot_2012.fasta	15998	100.0%	9	11	12	0.0855%	69.4%	LLVVYPWTQR	R	F	99.4%	31.3	26.7	20.9	1.49	0	1	0	0	2	1274.73			120002	32	41	Empty	true	HBD_HUMAN
Exp1_01	Hemoglobin subunit beta OS=Homo sapiens GN=HBB PE=1 SV=2	HBB_HUMAN	swissprot_2012.fasta	15998	100.0%	9	11	12	0.0855%	69.4%	SAVTALWGK	K	V	99.7%	54.6	27.1	22.7	2.06	0	1	0	0	2	9325200			24212	10	18	Empty	true
Exp1_01	Hemoglobin subunit beta OS=Homo sapiens GN=HBB PE=1 SV=2	HBB_HUMAN	swissprot_2012.fasta	15998	100.0%	9	11	12	0.0855%	69.4%	VHLTPEEK	M	S	99.7%	38.9	25.0	23.3	3.32	0	1	0	0	1	9525099			80019.4	2	9	Empty	true	HBD_HUMAN
Exp1_01	Hemoglobin subunit beta OS=Homo sapiens GN=HBB PE=1 SV=2	HBB_HUMAN	swissprot_2012.fasta	15998	100.0%	9	11	12	0.0855%	69.4%	VLGAFSDGLAHLDNLK	K	G	99.7%	97.6	28.5	87.0	7.35	0	1	1	0	2	1669.89			63601.9	68	83	Empty	true	HBD_HUMAN
Exp1_01	Hemoglobin subunit beta OS=Homo sapiens GN=HBB PE=1 SV=2	HBB_HUMAN	swissprot_2012.fasta	15998	100.0%	9	11	12	0.0855%	69.4%	VNVDEVGGEALGR	K	L	99.7%	79.3	28.4	64.6	5.74	0	1	0	0	2	1314.66			30020.6	19	31	Empty	true
Exp1_01	Hemoglobin subunit beta OS=Homo sapiens GN=HBB PE=1 SV=2	HBB_HUMAN	swissprot_2012.fasta	15998	100.0%	9	11	12	0.0855%	69.4%	VVAGVANALAHKYH	K	-	99.7%	43.2	26.6	23.1	1.57	0	0	1	0	2	1449.8			53784.6	134	147	Empty	true	HBD_HUMAN
Exp1_01	Complement factor I OS=Homo sapiens GN=CFI PE=1 SV=2	CFAI_HUMAN	swissprot_2012.fasta	65749.8	100.0%	3	3	3	0.0214%	5.32%	HGNTDSEGIVEVK	K	L	99.7%	81.9	28.3	68.3	3.82	0	1	0	0	2	1384.67			3242.22	118	130	Empty	true
Exp1_01	Complement factor I OS=Homo sapiens GN=CFI PE=1 SV=2	CFAI_HUMAN	swissprot_2012.fasta	65749.8	100.0%	3	3	3	0.0214%	5.32%	IVIEYVDR	R	I	99.3%	27.3	26.5	27.3	2.96	0	1	0	0	2	1006.56			24986.1	407	414	Empty	true
Exp1_01	Complement factor I OS=Homo sapiens GN=CFI PE=1 SV=2	CFAI_HUMAN	swissprot_2012.fasta	65749.8	100.0%	3	3	3	0.0214%	5.32%	VFSLQWGEVK	R	L	99.7%	55.7	27.8	39.6	3.60	0	1	0	0	2	1192.64			10748	481	490	Empty	true
Exp1_01	Protein Z-dependent protease inhibitor OS=Homo sapiens GN=SERPINA10 PE=1 SV=1	ZPI_HUMAN	swissprot_2012.fasta	50708.7	99.8%	2	3	3	0.0214%	6.76%	GLHLQALKPTKPGLLPSLFK	R	G	99.7%	35.5	25.0	35.5	1.35	0	0	1	1	2	2158.31			32767	127	146	Empty	true
Exp1_01	Protein Z-dependent protease inhibitor OS=Homo sapiens GN=SERPINA10 PE=1 SV=1	ZPI_HUMAN	swissprot_2012.fasta	50708.7	99.8%	2	3	3	0.0214%	6.76%	LILVDYILFK	K	G	99.7%	41.8	25.0	41.8	6.33	0	1	0	0	2	1236.76			733679	230	239	Empty	true
Exp1_01	Apolipoprotein M OS=Homo sapiens GN=APOM PE=1 SV=2	APOM_HUMAN	swissprot_2012.fasta	21253.9	100.0%	2	2	2	0.0143%	7.45%	KWIYHLTEGSTDLR	R	T	99.7%	48.1	30.1	36.4	0.000	0	0	1	0	2	1718.89			37043	99	112	Empty	true
Exp1_01	Apolipoprotein M OS=Homo sapiens GN=APOM PE=1 SV=2	APOM_HUMAN	swissprot_2012.fasta	21253.9	100.0%	2	2	2	0.0143%	7.45%	WIYHLTEGSTDLR	K	T	99.7%	42.9	29.8	28.4	4.24	0	0	1	0	2	1590.79			27214.8	100	112	Empty	true
Exp1_01	Ig heavy chain V-III region BUT OS=Homo sapiens PE=1 SV=1	HV306_HUMAN	swissprot_2012.fasta	12376.9	99.8%	2	3	4	0.0285%	26.1%	BTVYLQMBSLR	R	A	99.7%	70.5	28.8	18.9	6.31	0	1	0	0	2	1566.77			26025.5	76	86	Empty	true
Exp1_01	Ig heavy chain V-III region BUT OS=Homo sapiens PE=1 SV=1	HV306_HUMAN	swissprot_2012.fasta	12376.9	99.8%	2	3	4	0.0285%	26.1%	EVQLVETGGGLIQPGGSLR	-	L	99.7%	89.0	26.7	73.0	6.66	0	2	1	0	2	1910.03			19696.9	1	19	Empty	true
Exp1_01	Annexin A2 OS=Homo sapiens GN=ANXA2 PE=1 SV=2	ANXA2_HUMAN	swissprot_2012.fasta	38606.1	100.0%	3	3	3	0.0214%	11.2%	TDLEKDIISDTSGDFRK	K	L	99.7%	41.9	29.3	41.9	2.24	0	0	1	0	2	1939.96			20341	153	169	Empty	true
Exp1_01	Annexin A2 OS=Homo sapiens GN=ANXA2 PE=1 SV=2	ANXA2_HUMAN	swissprot_2012.fasta	38606.1	100.0%	3	3	3	0.0214%	11.2%	TNQELQEINR	R	V	99.7%	57.3	29.1	41.1	1.89	0	1	0	0	2	1244.62			5637.19	136	145	Empty	true
Exp1_01	Annexin A2 OS=Homo sapiens GN=ANXA2 PE=1 SV=2	ANXA2_HUMAN	swissprot_2012.fasta	38606.1	100.0%	3	3	3	0.0214%	11.2%	TPAQYDASELK	K	A	99.7%	45.0	29.0	45.0	2.43	0	1	0	0	2	1222.6			9948.71	105	115	Empty	true
Exp1_01	Ig lambda chain V-IV region Hil OS=Homo sapiens PE=1 SV=1	LV403_HUMAN	swissprot_2012.fasta	11516.7	99.8%	2	2	2	0.0143%	28.0%	DTQRPSGIPQR	K	F	96.7%	24.3	27.5	8.96	1.47	0	0	1	0	2	1256.62			21378.8	50	60	Empty	true
Exp1_01	Ig lambda chain V-IV region Hil OS=Homo sapiens PE=1 SV=1	LV403_HUMAN	swissprot_2012.fasta	11516.7	99.8%	2	2	2	0.0143%	28.0%	SYELTQPPSVSVSPGQTAR	-	I	99.7%	51.4	30.0	51.4	5.00	0	1	0	0	2	2004			8049.27	1	19	Empty	true
Exp1_01	Complement component C8 beta chain OS=Homo sapiens GN=C8B PE=1 SV=3	CO8B_HUMAN	swissprot_2012.fasta	67046.9	100.0%	10	11	12	0.0855%	22.7%	DFGTHYITEAVLGGIYEYTLVMNK	R	E	99.7%	46.5	30.2	32.3	4.59	0	0	1	0	2	2734.34			2102.94	339	362	Empty	true
Exp1_01	Complement component C8 beta chain OS=Homo sapiens GN=C8B PE=1 SV=3	CO8B_HUMAN	swissprot_2012.fasta	67046.9	100.0%	10	11	12	0.0855%	22.7%	EYESYSDFER	K	N	99.7%	42.4	25.0	42.4	2.68	0	1	0	0	2	1324.53			7976.77	233	242	Empty	true
Exp1_01	Complement component C8 beta chain OS=Homo sapiens GN=C8B PE=1 SV=3	CO8B_HUMAN	swissprot_2012.fasta	67046.9	100.0%	10	11	12	0.0855%	22.7%	FRKPYNVESYTPQTQGK	R	Y	99.7%	34.2	29.8	34.2	2.85	0	0	1	0	2	2043.03			14781.2	210	226	Empty	true
Exp1_01	Complement component C8 beta chain OS=Homo sapiens GN=C8B PE=1 SV=3	CO8B_HUMAN	swissprot_2012.fasta	67046.9	100.0%	10	11	12	0.0855%	22.7%	IPGIFELGISSQSDR	K	G	99.7%	63.9	29.6	53.6	5.55	0	1	0	0	2	1618.84			54171	260	274	Empty	true
Exp1_01	Complement component C8 beta chain OS=Homo sapiens GN=C8B PE=1 SV=3	CO8B_HUMAN	swissprot_2012.fasta	67046.9	100.0%	10	11	12	0.0855%	22.7%	QALEEFQK	K	E	98.1%	41.0	28.2	14.8	0.000	0	1	0	0	2	9925048			25038.4	491	498	Empty	true
Exp1_01	Complement component C8 beta chain OS=Homo sapiens GN=C8B PE=1 SV=3	CO8B_HUMAN	swissprot_2012.fasta	67046.9	100.0%	10	11	12	0.0855%	22.7%	RLPLEYSYGEYR	K	D	99.7%	36.0	29.7	36.0	1.16	0	0	1	0	2	1545.77			32547.5	323	334	Empty	true
Exp1_01	Complement component C8 beta chain OS=Homo sapiens GN=C8B PE=1 SV=3	CO8B_HUMAN	swissprot_2012.fasta	67046.9	100.0%	10	11	12	0.0855%	22.7%	SGFSFGFK	K	I	99.7%	51.8	28.3	51.8	2.96	0	1	0	0	2	8764250			13337.3	252	259	Empty	true
Exp1_01	Complement component C8 beta chain OS=Homo sapiens GN=C8B PE=1 SV=3	CO8B_HUMAN	swissprot_2012.fasta	67046.9	100.0%	10	11	12	0.0855%	22.7%	SLMLHYEFLQR	R	V	99.7%	55.0	29.4	41.1	2.66	0	1	2	0	2	1436.74			71452.6	310	320	Empty	true
Exp1_01	Complement component C8 beta chain OS=Homo sapiens GN=C8B PE=1 SV=3	CO8B_HUMAN	swissprot_2012.fasta	67046.9	100.0%	10	11	12	0.0855%	22.7%	SVFLHAR	K	S	97.0%	27.4	27.8	27.4	1.57	0	1	0	0	2	8294678			52037.4	290	296	Empty	true
Exp1_01	Complement component C8 beta chain OS=Homo sapiens GN=C8B PE=1 SV=3	CO8B_HUMAN	swissprot_2012.fasta	67046.9	100.0%	10	11	12	0.0855%	22.7%	VKVEPLYELVTATDFAYSSTVR	K	Q	99.7%	37.3	28.1	37.3	2.62	0	0	1	0	2	2488.3			56090.6	465	486	Empty	true
Exp1_01	Vitamin K-dependent protein C OS=Homo sapiens GN=PROC PE=1 SV=1	PROC_HUMAN	swissprot_2012.fasta	52071.2	100.0%	4	4	4	0.0285%	11.5%	DTEDQEDQVDPR	R	L	99.7%	66.0	25.0	52.9	2.08	0	1	0	0	2	1446.6			2484.59	200	211	Empty	true
Exp1_01	Vitamin K-dependent protein C OS=Homo sapiens GN=PROC PE=1 SV=1	PROC_HUMAN	swissprot_2012.fasta	52071.2	100.0%	4	4	4	0.0285%	11.5%	ELNQAGQETLVTGWGYHSSR	R	E	99.7%	38.6	29.7	38.6	3.96	0	0	1	0	2	2233.06			34620.5	329	348	Empty	true
Exp1_01	Vitamin K-dependent protein C OS=Homo sapiens GN=PROC PE=1 SV=1	PROC_HUMAN	swissprot_2012.fasta	52071.2	100.0%	4	4	4	0.0285%	11.5%	LGEYDLR	R	R	97.6%	38.9	27.2	15.4	0.000	0	1	0	0	2	8654415			52623.7	265	271	Empty	true
Exp1_01	Vitamin K-dependent protein C OS=Homo sapiens GN=PROC PE=1 SV=1	PROC_HUMAN	swissprot_2012.fasta	52071.2	100.0%	4	4	4	0.0285%	11.5%	RGDSPWQVVLLDSK	R	K	99.7%	56.3	28.5	36.0	3.30	0	0	1	0	2	1599.85			3829.89	220	233	Empty	true
Exp1_01	Ig kappa chain V-III region HAH OS=Homo sapiens PE=2 SV=1	KV312_HUMANKV313_HUMAN	swissprot_2012.fasta	14073.5	100.0%	4	6	10	0.0713%	41.9%	ASQSVSSSYLAWYQQKPGQAPR	R	L	99.7%	99.6	30.1	99.6	6.92	0	1	1	1	2	2439.21			28391.9	45	66	Empty	true
Exp1_01	Ig kappa chain V-III region HAH OS=Homo sapiens PE=2 SV=1	KV312_HUMANKV313_HUMAN	swissprot_2012.fasta	14073.5	100.0%	4	6	10	0.0713%	41.9%	ATGIPDRFSGSGSGTDFTLTISR	R	L	99.7%	45.2	30.1	45.2	3.62	0	0	1	0	2	2343.16			15058.2	76	98	Empty	true
Exp1_01	Ig kappa chain V-III region HAH OS=Homo sapiens PE=2 SV=1	KV312_HUMANKV313_HUMAN	swissprot_2012.fasta	14073.5	100.0%	4	6	10	0.0713%	41.9%	FSGSGSGTDFTLTISR	R	L	99.7%	112	29.7	101	5.54	0	5	0	0	2	1632.79			42956.7	83	98	Empty	true
Exp1_01	Ig kappa chain V-III region HAH OS=Homo sapiens PE=2 SV=1	KV312_HUMANKV313_HUMAN	swissprot_2012.fasta	14073.5	100.0%	4	6	10	0.0713%	41.9%	LLIYGASSR	R	A	98.5%	23.7	25.0	5.91	2.33	0	1	0	0	2	9795571			3421.88	67	75	Empty	true
Exp1_01	Alpha-1-acid glycoprotein 1 OS=Homo sapiens GN=ORM1 PE=1 SV=1	A1AG1_HUMAN	swissprot_2012.fasta	23512.1	100.0%	3	4	4	0.0285%	17.9%	TYMLAFDVNDEK	K	N	99.7%	38.2	26.8	38.2	3.85	0	1	0	0	2	1445.66			8264.74	127	138	Empty	true
Exp1_01	Alpha-1-acid glycoprotein 1 OS=Homo sapiens GN=ORM1 PE=1 SV=1	A1AG1_HUMAN	swissprot_2012.fasta	23512.1	100.0%	3	4	4	0.0285%	17.9%	WFYIASAFR	K	N	99.7%	39.5	29.1	39.5	2.85	0	1	0	0	2	1160.59			9198.69	43	51	Empty	true	A1AG2_HUMAN
Exp1_01	Alpha-1-acid glycoprotein 1 OS=Homo sapiens GN=ORM1 PE=1 SV=1	A1AG1_HUMAN	swissprot_2012.fasta	23512.1	100.0%	3	4	4	0.0285%	17.9%	YVGGQEHFAHLLILR	R	D	99.7%	50.1	26.8	39.5	3.00	0	0	1	1	2	1752.95			370097	109	123	Empty	true
Exp1_01	Vinculin OS=Homo sapiens GN=VCL PE=1 SV=4	VINC_HUMAN	swissprot_2012.fasta	123801	100.0%	10	10	10	0.0713%	12.7%	AIPDLTAPVAAVQAAVSNLVR	K	V	97.0%	32.9	25.0	32.9	0.000	0	0	1	0	2	2076.18			5892.11	36	56	Empty	true
Exp1_01	Vinculin OS=Homo sapiens GN=VCL PE=1 SV=4	VINC_HUMAN	swissprot_2012.fasta	123801	100.0%	10	10	10	0.0713%	12.7%	ALASQLQDSLK	R	D	99.7%	53.3	29.0	40.6	3.59	0	1	0	0	2	1173.65			11657.7	571	581	Empty	true
Exp1_01	Vinculin OS=Homo sapiens GN=VCL PE=1 SV=4	VINC_HUMAN	swissprot_2012.fasta	123801	100.0%	10	10	10	0.0713%	12.7%	AQQVSQGLDVLTAK	K	V	99.7%	98.9	29.1	85.3	5.96	0	1	0	0	2	1457.8			10264.8	353	366	Empty	true
Exp1_01	Vinculin OS=Homo sapiens GN=VCL PE=1 SV=4	VINC_HUMAN	swissprot_2012.fasta	123801	100.0%	10	10	10	0.0713%	12.7%	AVAGNISDPGLQK	K	S	99.7%	42.2	27.8	42.2	2.15	0	1	0	0	2	1269.68			5829.49	803	815	Empty	true
Exp1_01	Vinculin OS=Homo sapiens GN=VCL PE=1 SV=4	VINC_HUMAN	swissprot_2012.fasta	123801	100.0%	10	10	10	0.0713%	12.7%	GWLRDPSASPGDAGEQAIR	K	Q	99.7%	29.6	29.9	17.6	3.77	0	0	1	0	2	1982.97			9709.01	282	300	Empty	true
Exp1_01	Vinculin OS=Homo sapiens GN=VCL PE=1 SV=4	VINC_HUMAN	swissprot_2012.fasta	123801	100.0%	10	10	10	0.0713%	12.7%	LLAVAATAPPDAPNREEVFDER	K	A	99.7%	34.7	29.8	34.7	4.15	0	0	1	0	2	2381.21			25047.3	608	629	Empty	true
Exp1_01	Vinculin OS=Homo sapiens GN=VCL PE=1 SV=4	VINC_HUMAN	swissprot_2012.fasta	123801	100.0%	10	10	10	0.0713%	12.7%	MALLMAEMSR	R	L	99.7%	59.1	27.9	38.3	3.40	0	1	0	0	2	1152.56			27494.2	994	1003	Empty	true
Exp1_01	Vinculin OS=Homo sapiens GN=VCL PE=1 SV=4	VINC_HUMAN	swissprot_2012.fasta	123801	100.0%	10	10	10	0.0713%	12.7%	MLGQMTDQVADLR	K	A	99.7%	82.2	29.6	68.4	4.38	0	1	0	0	2	1477.71			9781.03	327	339	Empty	true
Exp1_01	Vinculin OS=Homo sapiens GN=VCL PE=1 SV=4	VINC_HUMAN	swissprot_2012.fasta	123801	100.0%	10	10	10	0.0713%	12.7%	QQELTHQEHR	R	V	99.7%	38.0	29.2	38.0	1.43	0	1	0	0	2	1305.63			2343.34	179	188	Empty	true
Exp1_01	Vinculin OS=Homo sapiens GN=VCL PE=1 SV=4	VINC_HUMAN	swissprot_2012.fasta	123801	100.0%	10	10	10	0.0713%	12.7%	STVEGIQASVK	K	T	99.7%	47.0	28.7	47.0	3.13	0	1	0	0	2	1118.61			8263.02	656	666	Empty	true
Exp1_01	Fructose-bisphosphate aldolase A OS=Homo sapiens GN=ALDOA PE=1 SV=2	ALDOA_HUMAN	swissprot_2012.fasta	39420.6	100.0%	2	2	2	0.0143%	6.32%	AAQEEYVKR	K	A	99.7%	47.7	27.3	47.7	1.55	0	1	0	0	2	1093.56			4751.47	323	331	Empty	true
Exp1_01	Fructose-bisphosphate aldolase A OS=Homo sapiens GN=ALDOA PE=1 SV=2	ALDOA_HUMAN	swissprot_2012.fasta	39420.6	100.0%	2	2	2	0.0143%	6.32%	GILAADESTGSIAK	K	R	99.7%	63.5	29.4	49.7	6.57	0	1	0	0	2	1332.7			8382.2	29	42	Empty	true
Exp1_01	Complement C1s subcomponent OS=Homo sapiens GN=C1S PE=1 SV=1	C1S_HUMAN	swissprot_2012.fasta	76684.2	100.0%	10	13	14	0.0998%	20.1%	EDTPNSVWEPAK	K	A	99.7%	54.3	26.3	54.3	1.52	0	1	0	0	2	1372.64			3192.17	297	308	Empty	true
Exp1_01	Complement C1s subcomponent OS=Homo sapiens GN=C1S PE=1 SV=1	C1S_HUMAN	swissprot_2012.fasta	76684.2	100.0%	10	13	14	0.0998%	20.1%	EPTMYVGSTSVQTSR	R	L	99.7%	61.2	28.3	61.2	2.64	0	1	0	0	2	1642.77			3844.62	482	496	Empty	true
Exp1_01	Complement C1s subcomponent OS=Homo sapiens GN=C1S PE=1 SV=1	C1S_HUMAN	swissprot_2012.fasta	76684.2	100.0%	10	13	14	0.0998%	20.1%	GDSGGAFAVQDPNDK	K	T	99.7%	66.7	26.3	66.7	2.64	0	1	0	0	2	1477.66			1299.42	630	644	Empty	true
Exp1_01	Complement C1s subcomponent OS=Homo sapiens GN=C1S PE=1 SV=1	C1S_HUMAN	swissprot_2012.fasta	76684.2	100.0%	10	13	14	0.0998%	20.1%	MLTPEHVFIHPGWK	K	L	99.7%	35.8	29.4	22.2	2.00	0	0	2	1	2	1691.87			71838.1	502	515	Empty	true
Exp1_01	Complement C1s subcomponent OS=Homo sapiens GN=C1S PE=1 SV=1	C1S_HUMAN	swissprot_2012.fasta	76684.2	100.0%	10	13	14	0.0998%	20.1%	SNALDIIFQTDLTGQK	K	K	99.7%	68.3	29.0	68.3	3.92	0	1	0	0	2	1763.92			34982.5	265	280	Empty	true
Exp1_01	Complement C1s subcomponent OS=Homo sapiens GN=C1S PE=1 SV=1	C1S_HUMAN	swissprot_2012.fasta	76684.2	100.0%	10	13	14	0.0998%	20.1%	SSNNPHSPIVEEFQVPYNK	R	L	99.0%	30.3	29.8	15.7	1.39	0	0	1	0	2	2186.05			40473.5	87	105	Empty	true
Exp1_01	Complement C1s subcomponent OS=Homo sapiens GN=C1S PE=1 SV=1	C1S_HUMAN	swissprot_2012.fasta	76684.2	100.0%	10	13	14	0.0998%	20.1%	TMQENSTPRED	K	-	99.7%	50.1	25.0	14.3	2.39	0	2	0	0	2	1308.54			8977.7	678	688	Empty	true
Exp1_01	Complement C1s subcomponent OS=Homo sapiens GN=C1S PE=1 SV=1	C1S_HUMAN	swissprot_2012.fasta	76684.2	100.0%	10	13	14	0.0998%	20.1%	TNFDNDIALVR	R	L	99.7%	61.8	29.6	48.4	4.49	0	1	0	0	2	1277.65			14907.2	524	534	Empty	true
Exp1_01	Complement C1s subcomponent OS=Homo sapiens GN=C1S PE=1 SV=1	C1S_HUMAN	swissprot_2012.fasta	76684.2	100.0%	10	13	14	0.0998%	20.1%	VGATSFYSTCQSNGK	R	W	98.7%	27.1	25.0	7.63	1.48	0	1	0	0	2	1607.7			6640.05	332	346	Empty	true
Exp1_01	Complement C1s subcomponent OS=Homo sapiens GN=C1S PE=1 SV=1	C1S_HUMAN	swissprot_2012.fasta	76684.2	100.0%	10	13	14	0.0998%	20.1%	VKNYVDWIMK	R	T	99.7%	42.8	27.3	25.1	1.92	0	1	1	0	2	1295.68			44290.4	668	677	Empty	true
Exp1_01	Ig alpha-1 chain C region OS=Homo sapiens GN=IGHA1 PE=1 SV=2	IGHA1_HUMAN	swissprot_2012.fasta	37653.8	100.0%	4	5	6	0.0428%	14.4%	DASGVTFTWTPSSGK	R	S	99.7%	54.6	28.4	54.6	3.60	0	2	0	0	2	1540.73			28962.5	154	168	Empty	true
Exp1_01	Ig alpha-1 chain C region OS=Homo sapiens GN=IGHA1 PE=1 SV=2	IGHA1_HUMAN	swissprot_2012.fasta	37653.8	100.0%	4	5	6	0.0428%	14.4%	QEPSQGTTTFAVTSILR	R	V	99.7%	96.4	29.1	96.4	3.46	0	1	1	0	2	1835.95			40444.7	283	299	Empty	true
Exp1_01	Ig alpha-1 chain C region OS=Homo sapiens GN=IGHA1 PE=1 SV=2	IGHA1_HUMAN	swissprot_2012.fasta	37653.8	100.0%	4	5	6	0.0428%	14.4%	TPLTATLSK	K	S	99.6%	31.0	25.1	13.4	3.54	0	1	0	0	2	9315460			322903	213	221	Empty	true
Exp1_01	Ig alpha-1 chain C region OS=Homo sapiens GN=IGHA1 PE=1 SV=2	IGHA1_HUMAN	swissprot_2012.fasta	37653.8	100.0%	4	5	6	0.0428%	14.4%	WLQGSQELPR	R	E	99.7%	63.9	28.1	50.9	1.43	0	1	0	0	2	1213.63			189822	264	273	Empty	true
Exp1_01	Ig kappa chain V-III region VG (Fragment) OS=Homo sapiens PE=1 SV=1	KV309_HUMAN	swissprot_2012.fasta	12575.7	99.8%	2	2	2	0.0143%	26.1%	ASQSVSSYLAWYQQKPGQAPR	R	L	99.7%	49.0	30.1	49.0	3.12	0	0	1	0	2	2352.17			104381	45	65	Empty	true
Exp1_01	Ig kappa chain V-III region VG (Fragment) OS=Homo sapiens PE=1 SV=1	KV309_HUMAN	swissprot_2012.fasta	12575.7	99.8%	2	2	2	0.0143%	26.1%	LLIYDASNR	R	A	99.7%	43.4	26.7	43.4	1.42	0	1	0	0	2	1064.57			191877	66	74	Empty	true
Exp1_01	Cholesteryl ester transfer protein OS=Homo sapiens GN=CETP PE=1 SV=2	CETP_HUMAN	swissprot_2012.fasta	54757.2	99.8%	2	2	2	0.0143%	4.87%	AMMLLGQVK	K	Y	98.7%	29.9	28.3	16.9	2.44	0	1	0	0	2	9905476			9280.22	65	73	Empty	true
Exp1_01	Cholesteryl ester transfer protein OS=Homo sapiens GN=CETP PE=1 SV=2	CETP_HUMAN	swissprot_2012.fasta	54757.2	99.8%	2	2	2	0.0143%	4.87%	ITKPALLVLNHETAK	R	V	99.7%	39.3	25.0	25.9	0.000	0	0	0	1	2	1647.98			15583.3	32	46	Empty	true
Exp1_01	Keratin type II cuticular Hb3 OS=Homo sapiens GN=KRT83 PE=1 SV=2	KRT83_HUMAN	swissprot_2012.fasta	54194.9	100.0%	2	2	2	0.0143%	3.04%	LLEGEEQR	R	L	99.7%	45.6	29.1	13.9	1.44	0	1	0	0	2	9734950			16731.2	414	421	Empty	true
Exp1_01	Keratin type II cuticular Hb3 OS=Homo sapiens GN=KRT83 PE=1 SV=2	KRT83_HUMAN	swissprot_2012.fasta	54194.9	100.0%	2	2	2	0.0143%	3.04%	LYEEEIR	R	I	98.7%	40.5	26.3	17.2	0.000	0	1	0	0	2	9514782			7668.56	247	253	Empty	true	KRT85_HUMANK121P_HUMAN
Exp1_01	Hornerin OS=Homo sapiens GN=HRNR PE=1 SV=2	HORN_HUMAN	swissprot_2012.fasta	282373	100.0%	9	15	15	0.107%	6.60%	GEQHGSSSGSSSSYGQHGSGSR	R	Q	99.7%	83.9	25.0	83.9	6.28	0	1	1	1	2	2122.88			9363.55	1910	1931	Empty	true
Exp1_01	Hornerin OS=Homo sapiens GN=HRNR PE=1 SV=2	HORN_HUMAN	swissprot_2012.fasta	282373	100.0%	9	15	15	0.107%	6.60%	GPYESGSGHSSGLGHQESR	R	S	98.4%	32.0	26.1	32.0	0.000	0	0	0	1	2	1928.85			15561.7	572	590	Empty	true
Exp1_01	Hornerin OS=Homo sapiens GN=HRNR PE=1 SV=2	HORN_HUMAN	swissprot_2012.fasta	282373	100.0%	9	15	15	0.107%	6.60%	GPYESGSGHSSGLGHR	R	E	99.7%	40.5	26.9	40.5	1.48	0	0	1	0	2	1584.71			12462.5	1038	1053	Empty	true
Exp1_01	Hornerin OS=Homo sapiens GN=HRNR PE=1 SV=2	HORN_HUMAN	swissprot_2012.fasta	282373	100.0%	9	15	15	0.107%	6.60%	GSGSGQSPSSGQHGTGFGR	R	S	99.7%	39.2	25.8	28.2	2.12	0	0	1	0	2	1747.77			11089.2	430	448	Empty	true
Exp1_01	Hornerin OS=Homo sapiens GN=HRNR PE=1 SV=2	HORN_HUMAN	swissprot_2012.fasta	282373	100.0%	9	15	15	0.107%	6.60%	HGSGLGHSSSHGQHGSGSGR	R	S	99.7%	89.4	27.1	89.4	8.21	0	1	1	1	2	1885.84			6895.69	1248	1267	Empty	true
Exp1_01	Hornerin OS=Homo sapiens GN=HRNR PE=1 SV=2	HORN_HUMAN	swissprot_2012.fasta	282373	100.0%	9	15	15	0.107%	6.60%	HGSGSGHSSSHGQHGSGSSYSYSR	R	G	99.7%	45.8	25.0	45.8	1.34	0	0	0	1	2	2389.99			6585.24	312	335	Empty	true
Exp1_01	Hornerin OS=Homo sapiens GN=HRNR PE=1 SV=2	HORN_HUMAN	swissprot_2012.fasta	282373	100.0%	9	15	15	0.107%	6.60%	HGSGSGHSSSYGQHGSGSGWSSSSGR	R	H	99.7%	54.2	25.0	54.2	2.80	0	0	0	2	2	2477.02			21337.6	1365	1390	Empty	true
Exp1_01	Hornerin OS=Homo sapiens GN=HRNR PE=1 SV=2	HORN_HUMAN	swissprot_2012.fasta	282373	100.0%	9	15	15	0.107%	6.60%	QSLGHGQHGSGSGQSPSPSR	R	G	99.4%	30.6	28.8	30.6	1.80	0	0	1	0	2	1947.9			4281.95	992	1011	Empty	true
Exp1_01	Hornerin OS=Homo sapiens GN=HRNR PE=1 SV=2	HORN_HUMAN	swissprot_2012.fasta	282373	100.0%	9	15	15	0.107%	6.60%	SEQHGSSSGSSSSYGQHGSGSR	R	Q	99.7%	58.3	25.0	42.3	3.68	0	1	1	0	2	2152.89			2779.99	970	991	Empty	true
Exp1_01	Secreted phosphoprotein 24 OS=Homo sapiens GN=SPP2 PE=1 SV=1	SPP24_HUMAN	swissprot_2012.fasta	24338.1	99.8%	2	4	5	0.0356%	11.4%	VNSQSLSPYLFR	K	A	99.7%	50.4	28.1	50.4	2.72	0	1	1	0	2	1410.74			61078.3	51	62	Empty	true
Exp1_01	Secreted phosphoprotein 24 OS=Homo sapiens GN=SPP2 PE=1 SV=1	SPP24_HUMAN	swissprot_2012.fasta	24338.1	99.8%	2	4	5	0.0356%	11.4%	VSAQQVQGVHAR	K	C	99.7%	70.7	28.1	54.8	8.70	0	2	1	0	2	1279.69			89736.8	122	133	Empty	true
Exp1_01	N-acetylmuramoyl-L-alanine amidase OS=Homo sapiens GN=PGLYRP2 PE=1 SV=1	PGRP2_HUMAN	swissprot_2012.fasta	62217.9	99.8%	2	2	2	0.0143%	5.03%	AGLLRPDYALLGHR	R	Q	99.7%	53.7	25.6	53.7	4.57	0	0	1	0	2	1551.88			18538.8	510	523	Empty	true
Exp1_01	N-acetylmuramoyl-L-alanine amidase OS=Homo sapiens GN=PGLYRP2 PE=1 SV=1	PGRP2_HUMAN	swissprot_2012.fasta	62217.9	99.8%	2	2	2	0.0143%	5.03%	GWHWVGAHTLGHNSR	R	G	98.6%	36.1	29.7	26.0	0.000	0	0	0	1	2	1714.83			79688.8	462	476	Empty	true
Exp1_01	Multimerin-1 OS=Homo sapiens GN=MMRN1 PE=1 SV=3	MMRN1_HUMAN	swissprot_2012.fasta	138113	99.9%	2	2	2	0.0143%	1.63%	MTDQVNYQAMK	K	L	99.7%	62.5	25.2	62.5	7.21	0	1	0	0	2	1328.6			9444.9	324	334	Empty	true
Exp1_01	Multimerin-1 OS=Homo sapiens GN=MMRN1 PE=1 SV=3	MMRN1_HUMAN	swissprot_2012.fasta	138113	99.9%	2	2	2	0.0143%	1.63%	NTYSSLEGK	R	V	99.2%	29.7	25.9	29.7	1.82	0	1	0	0	2	9984789			6154.82	354	362	Empty	true
Exp1_01	Complement C3 OS=Homo sapiens GN=C3 PE=1 SV=2	CO3_HUMAN	swissprot_2012.fasta	187149	100.0%	108	193	500	3.56%	67.7%	AAVYHHFISDGVR	K	K	99.7%	48.0	28.9	34.5	3.55	0	2	2	0	2	1471.74			1460270	914	926	Empty	true
Exp1_01	Complement C3 OS=Homo sapiens GN=C3 PE=1 SV=2	CO3_HUMAN	swissprot_2012.fasta	187149	100.0%	108	193	500	3.56%	67.7%	AAVYHHFISDGVRK	K	S	99.7%	44.7	29.2	28.4	2.23	0	1	2	0	2	1599.84			90683.2	914	927	Empty	true
Exp1_01	Complement C3 OS=Homo sapiens GN=C3 PE=1 SV=2	CO3_HUMAN	swissprot_2012.fasta	187149	100.0%	108	193	500	3.56%	67.7%	AEDLVGKSLYVSATVILHSGSDMVQAER	R	S	99.7%	99.0	28.9	80.3	5.49	0	0	1	1	2	2975.51			82770.6	316	343	Empty	true
Exp1_01	Complement C3 OS=Homo sapiens GN=C3 PE=1 SV=2	CO3_HUMAN	swissprot_2012.fasta	187149	100.0%	108	193	500	3.56%	67.7%	AGDFLEANYMNLQR	K	S	99.7%	72.9	28.2	52.1	4.24	0	6	1	0	2	1641.77			266109	1172	1185	Empty	true
Exp1_01	Complement C3 OS=Homo sapiens GN=C3 PE=1 SV=2	CO3_HUMAN	swissprot_2012.fasta	187149	100.0%	108	193	500	3.56%	67.7%	APSTWLTAYVVK	R	V	99.7%	61.2	27.0	61.2	4.26	0	1	1	0	2	1335.73			300582	1073	1084	Empty	true
Exp1_01	Complement C3 OS=Homo sapiens GN=C3 PE=1 SV=2	CO3_HUMAN	swissprot_2012.fasta	187149	100.0%	108	193	500	3.56%	67.7%	ASHLGLAR	R	S	99.7%	43.3	25.0	30.0	2.68	0	1	0	0	2	8244737			14236.7	741	748	Empty	true
Exp1_01	Complement C3 OS=Homo sapiens GN=C3 PE=1 SV=2	CO3_HUMAN	swissprot_2012.fasta	187149	100.0%	108	193	500	3.56%	67.7%	AVLYNYR	R	Q	99.7%	38.1	25.6	16.4	1.55	0	2	0	0	2	8984780			320910	849	855	Empty	true
Exp1_01	Complement C3 OS=Homo sapiens GN=C3 PE=1 SV=2	CO3_HUMAN	swissprot_2012.fasta	187149	100.0%	108	193	500	3.56%	67.7%	AYYENSPQQVFSTEFEVK	R	E	99.7%	76.4	29.1	76.4	10.9	0	2	1	0	2	2166			32398.2	208	225	Empty	true
Exp1_01	Complement C3 OS=Homo sapiens GN=C3 PE=1 SV=2	CO3_HUMAN	swissprot_2012.fasta	187149	100.0%	108	193	500	3.56%	67.7%	DAPDHQELNLDVSLQLPSR	K	S	99.7%	114	30.1	114	10.1	0	3	4	0	2	2147.07			207709	1285	1303	Empty	true
Exp1_01	Complement C3 OS=Homo sapiens GN=C3 PE=1 SV=2	CO3_HUMAN	swissprot_2012.fasta	187149	100.0%	108	193	500	3.56%	67.7%	DFDFVPPVVR	K	W	99.7%	51.7	28.8	40.1	4.36	0	1	0	0	2	1190.62			174883	1245	1254	Empty	true
Exp1_01	Complement C3 OS=Homo sapiens GN=C3 PE=1 SV=2	CO3_HUMAN	swissprot_2012.fasta	187149	100.0%	108	193	500	3.56%	67.7%	DICEEQVNSLPGSITK	K	A	99.7%	65.7	29.3	52.3	0.000	0	4	0	0	2	1832.86			21837.8	1156	1171	Empty	true
Exp1_01	Complement C3 OS=Homo sapiens GN=C3 PE=1 SV=2	CO3_HUMAN	swissprot_2012.fasta	187149	100.0%	108	193	500	3.56%	67.7%	DMALTAFVLISLQEAK	K	D	99.7%	94.2	27.8	73.1	4.16	0	17	4	0	2	1749.95			93454.3	1140	1155	Empty	true
Exp1_01	Complement C3 OS=Homo sapiens GN=C3 PE=1 SV=2	CO3_HUMAN	swissprot_2012.fasta	187149	100.0%	108	193	500	3.56%	67.7%	DSITTWEILAVSMSDK	K	K	99.7%	83.2	29.8	63.0	7.54	0	1	0	0	2	1795.88			2952.38	797	812	Empty	true
Exp1_01	Complement C3 OS=Homo sapiens GN=C3 PE=1 SV=2	CO3_HUMAN	swissprot_2012.fasta	187149	100.0%	108	193	500	3.56%	67.7%	DSITTWEILAVSMSDKK	K	G	99.7%	84.8	29.3	84.8	6.85	0	2	2	0	2	1923.97			420506	797	813	Empty	true
Exp1_01	Complement C3 OS=Homo sapiens GN=C3 PE=1 SV=2	CO3_HUMAN	swissprot_2012.fasta	187149	100.0%	108	193	500	3.56%	67.7%	DTWVEHWPEEDECQDEENQK	K	Q	99.7%	49.8	25.0	29.3	8.57	0	0	1	0	2	2604.01			1923.65	1625	1644	Empty	true
Exp1_01	Complement C3 OS=Homo sapiens GN=C3 PE=1 SV=2	CO3_HUMAN	swissprot_2012.fasta	187149	100.0%	108	193	500	3.56%	67.7%	DYAGVFSDAGLTFTSSSGQQTAQR	K	A	99.7%	159	29.5	159	11.1	0	1	3	0	2	2494.15			72602.4	634	657	Empty	true
Exp1_01	Complement C3 OS=Homo sapiens GN=C3 PE=1 SV=2	CO3_HUMAN	swissprot_2012.fasta	187149	100.0%	108	193	500	3.56%	67.7%	EALKLEEK	R	K	99.0%	43.1	27.5	0.370	0.000	0	1	0	0	2	9595409			173295	1592	1599	Empty	true
Exp1_01	Complement C3 OS=Homo sapiens GN=C3 PE=1 SV=2	CO3_HUMAN	swissprot_2012.fasta	187149	100.0%	108	193	500	3.56%	67.7%	EDIPPADLSDQVPDTESETR	K	I	99.7%	78.3	28.0	78.3	6.72	0	3	0	0	2	2214			21282.3	960	979	Empty	true
Exp1_01	Complement C3 OS=Homo sapiens GN=C3 PE=1 SV=2	CO3_HUMAN	swissprot_2012.fasta	187149	100.0%	108	193	500	3.56%	67.7%	EGVQKEDIPPADLSDQVPDTESETR	R	I	99.7%	75.3	29.6	61.2	4.06	0	1	15	0	2	2755.29			630576	955	979	Empty	true
Exp1_01	Complement C3 OS=Homo sapiens GN=C3 PE=1 SV=2	CO3_HUMAN	swissprot_2012.fasta	187149	100.0%	108	193	500	3.56%	67.7%	EPGQDLVVLPLSITTDFIPSFR	R	L	99.7%	59.4	26.2	59.4	6.30	0	1	0	0	2	2444.31			649883	509	530	Empty	true
Exp1_01	Complement C3 OS=Homo sapiens GN=C3 PE=1 SV=2	CO3_HUMAN	swissprot_2012.fasta	187149	100.0%	108	193	500	3.56%	67.7%	EVVADSVWVDVK	R	D	99.7%	86.4	30.0	72.8	4.35	0	9	1	0	2	1345.7			792542	545	556	Empty	true
Exp1_01	Complement C3 OS=Homo sapiens GN=C3 PE=1 SV=2	CO3_HUMAN	swissprot_2012.fasta	187149	100.0%	108	193	500	3.56%	67.7%	EYVLPSFEVIVEPTEK	K	F	99.7%	88.8	28.8	75.4	6.07	0	2	1	0	2	1878.97			1079730	226	241	Empty	true
Exp1_01	Complement C3 OS=Homo sapiens GN=C3 PE=1 SV=2	CO3_HUMAN	swissprot_2012.fasta	187149	100.0%	108	193	500	3.56%	67.7%	FVTVQATFGTQVVEK	K	V	99.7%	140	27.8	123	6.46	0	23	4	0	2	1653.88			285212	105	119	Empty	true
Exp1_01	Complement C3 OS=Homo sapiens GN=C3 PE=1 SV=2	CO3_HUMAN	swissprot_2012.fasta	187149	100.0%	108	193	500	3.56%	67.7%	FYHPEKEDGK	R	L	99.7%	46.0	28.2	25.8	2.13	0	1	0	0	2	1249.58			4749.33	1492	1501	Empty	true
Exp1_01	Complement C3 OS=Homo sapiens GN=C3 PE=1 SV=2	CO3_HUMAN	swissprot_2012.fasta	187149	100.0%	108	193	500	3.56%	67.7%	FYHPEKEDGKLNK	R	L	99.7%	39.9	29.9	20.8	1.37	0	0	1	0	2	1604.81			218960	1492	1504	Empty	true
Exp1_01	Complement C3 OS=Homo sapiens GN=C3 PE=1 SV=2	CO3_HUMAN	swissprot_2012.fasta	187149	100.0%	108	193	500	3.56%	67.7%	FYYIYNEK	K	G	99.7%	45.0	26.7	45.0	1.62	0	1	0	0	2	1139.54			1038050	242	249	Empty	true
Exp1_01	Complement C3 OS=Homo sapiens GN=C3 PE=1 SV=2	CO3_HUMAN	swissprot_2012.fasta	187149	100.0%	108	193	500	3.56%	67.7%	GLEVTITAR	K	F	99.7%	67.6	26.6	37.7	4.18	0	9	0	0	2	9595521			466639	250	258	Empty	true
Exp1_01	Complement C3 OS=Homo sapiens GN=C3 PE=1 SV=2	CO3_HUMAN	swissprot_2012.fasta	187149	100.0%	108	193	500	3.56%	67.7%	GQGTLSVVTMYHAK	K	A	99.7%	62.0	29.8	47.3	1.43	0	1	5	0	2	1491.76			1158790	1338	1351	Empty	true
Exp1_01	Complement C3 OS=Homo sapiens GN=C3 PE=1 SV=2	CO3_HUMAN	swissprot_2012.fasta	187149	100.0%	108	193	500	3.56%	67.7%	GVFVLNKK	K	N	99.7%	47.8	25.0	47.8	1.49	0	2	0	0	2	9055456			34682.5	601	608	Empty	true
Exp1_01	Complement C3 OS=Homo sapiens GN=C3 PE=1 SV=2	CO3_HUMAN	swissprot_2012.fasta	187149	100.0%	108	193	500	3.56%	67.7%	GYTQQLAFR	K	Q	99.7%	57.0	27.0	39.0	4.00	0	2	0	0	2	1083.56			294589	1052	1060	Empty	true
Exp1_01	Complement C3 OS=Homo sapiens GN=C3 PE=1 SV=2	CO3_HUMAN	swissprot_2012.fasta	187149	100.0%	108	193	500	3.56%	67.7%	HLIVTPSGCGEQNMIGMTPTVIAVHYLDETEQWEK	K	F	99.7%	104	29.6	93.2	8.00	0	0	1	0	2	3984.88			39773.9	1002	1036	Empty	true
Exp1_01	Complement C3 OS=Homo sapiens GN=C3 PE=1 SV=2	CO3_HUMAN	swissprot_2012.fasta	187149	100.0%	108	193	500	3.56%	67.7%	HQQTVTIPPK	R	S	99.7%	48.9	27.0	48.9	2.37	0	22	0	0	2	1148.64			528448	882	891	Empty	true
Exp1_01	Complement C3 OS=Homo sapiens GN=C3 PE=1 SV=2	CO3_HUMAN	swissprot_2012.fasta	187149	100.0%	108	193	500	3.56%	67.7%	HYLMWGLSSDFWGEKPNLSYIIGK	K	D	99.7%	77.5	30.1	66.6	6.80	0	0	1	1	2	2841.41			25844.9	1601	1624	Empty	true
Exp1_01	Complement C3 OS=Homo sapiens GN=C3 PE=1 SV=2	CO3_HUMAN	swissprot_2012.fasta	187149	100.0%	108	193	500	3.56%	67.7%	IHWESASLLR	R	S	99.7%	36.9	26.9	14.6	7.41	0	1	1	0	2	1211.65			43904.2	1311	1320	Empty	true
Exp1_01	Complement C3 OS=Homo sapiens GN=C3 PE=1 SV=2	CO3_HUMAN	swissprot_2012.fasta	187149	100.0%	108	193	500	3.56%	67.7%	ILLQGTPVAQMTEDAVDAER	R	L	99.7%	116	30.3	105	10.5	0	3	2	0	2	2173.08			1671580	980	999	Empty	true
Exp1_01	Complement C3 OS=Homo sapiens GN=C3 PE=1 SV=2	CO3_HUMAN	swissprot_2012.fasta	187149	100.0%	108	193	500	3.56%	67.7%	IPIEDGSGEVVLSR	R	K	99.7%	99.4	29.1	84.2	5.00	0	4	1	0	2	1470.78			138949	291	304	Empty	true
Exp1_01	Complement C3 OS=Homo sapiens GN=C3 PE=1 SV=2	CO3_HUMAN	swissprot_2012.fasta	187149	100.0%	108	193	500	3.56%	67.7%	ISLPESLK	R	R	99.7%	45.5	26.5	18.9	1.80	0	2	0	0	2	8865245			67099.9	282	289	Empty	true
Exp1_01	Complement C3 OS=Homo sapiens GN=C3 PE=1 SV=2	CO3_HUMAN	swissprot_2012.fasta	187149	100.0%	108	193	500	3.56%	67.7%	ISLPESLKR	R	I	99.7%	41.7	25.0	25.8	1.25	0	2	0	0	2	1042.63			119183	282	290	Empty	true
Exp1_01	Complement C3 OS=Homo sapiens GN=C3 PE=1 SV=2	CO3_HUMAN	swissprot_2012.fasta	187149	100.0%	108	193	500	3.56%	67.7%	IWDVVEK	K	A	98.8%	33.0	30.6	10.9	1.29	0	1	0	0	2	8884826			481548	616	622	Empty	true
Exp1_01	Complement C3 OS=Homo sapiens GN=C3 PE=1 SV=2	CO3_HUMAN	swissprot_2012.fasta	187149	100.0%	108	193	500	3.56%	67.7%	KGYTQQLAFR	K	Q	99.7%	43.0	26.9	43.0	1.41	0	1	1	0	2	1211.65			19433.7	1051	1060	Empty	true
Exp1_01	Complement C3 OS=Homo sapiens GN=C3 PE=1 SV=2	CO3_HUMAN	swissprot_2012.fasta	187149	100.0%	108	193	500	3.56%	67.7%	KHYLMWGLSSDFWGEKPNLSYIIGK	K	D	99.7%	77.9	29.5	77.9	4.28	0	0	1	2	2	2969.5			2734070	1600	1624	Empty	true
Exp1_01	Complement C3 OS=Homo sapiens GN=C3 PE=1 SV=2	CO3_HUMAN	swissprot_2012.fasta	187149	100.0%	108	193	500	3.56%	67.7%	KQELSEAEQATR	K	T	99.7%	73.7	29.9	55.1	6.54	0	3	2	0	2	1389.7			126084	428	439	Empty	true
Exp1_01	Complement C3 OS=Homo sapiens GN=C3 PE=1 SV=2	CO3_HUMAN	swissprot_2012.fasta	187149	100.0%	108	193	500	3.56%	67.7%	KVEGTAFVIFGIQDGEQR	K	I	99.7%	123	29.3	112	7.28	0	2	14	0	2	1994.03			234053	264	281	Empty	true
Exp1_01	Complement C3 OS=Homo sapiens GN=C3 PE=1 SV=2	CO3_HUMAN	swissprot_2012.fasta	187149	100.0%	108	193	500	3.56%	67.7%	KVLLDGVQNPR	R	A	99.7%	71.3	25.0	55.6	1.33	0	3	2	0	2	1238.72			1168910	305	315	Empty	true
Exp1_01	Complement C3 OS=Homo sapiens GN=C3 PE=1 SV=2	CO3_HUMAN	swissprot_2012.fasta	187149	100.0%	108	193	500	3.56%	67.7%	LESEETMVLEAHDAQGDVPVTVTVHDFPGK	R	K	99.7%	107	30.1	107	7.42	0	0	2	4	2	3250.56			426105	36	65	Empty	true
Exp1_01	Complement C3 OS=Homo sapiens GN=C3 PE=1 SV=2	CO3_HUMAN	swissprot_2012.fasta	187149	100.0%	108	193	500	3.56%	67.7%	LESEETMVLEAHDAQGDVPVTVTVHDFPGKK	R	L	99.7%	74.9	29.9	74.9	6.92	0	0	2	3	2	3378.65			572582	36	66	Empty	true
Exp1_01	Complement C3 OS=Homo sapiens GN=C3 PE=1 SV=2	CO3_HUMAN	swissprot_2012.fasta	187149	100.0%	108	193	500	3.56%	67.7%	LKGPLLNK	R	F	99.7%	39.9	25.0	26.8	5.21	0	1	0	0	2	8825773			302197	1202	1209	Empty	true
Exp1_01	Complement C3 OS=Homo sapiens GN=C3 PE=1 SV=2	CO3_HUMAN	swissprot_2012.fasta	187149	100.0%	108	193	500	3.56%	67.7%	LMNIFLK	K	D	99.7%	52.3	25.0	27.6	0.000	0	4	0	0	2	8785169			548360	790	796	Empty	true
Exp1_01	Complement C3 OS=Homo sapiens GN=C3 PE=1 SV=2	CO3_HUMAN	swissprot_2012.fasta	187149	100.0%	108	193	500	3.56%	67.7%	LMNIFLKDSITTWEILAVSMSDKK	K	G	99.7%	30.8	27.2	30.8	1.54	0	0	0	1	2	2783.47			18843.8	790	813	Empty	true
Exp1_01	Complement C3 OS=Homo sapiens GN=C3 PE=1 SV=2	CO3_HUMAN	swissprot_2012.fasta	187149	100.0%	108	193	500	3.56%	67.7%	LPYSVVR	R	N	99.7%	40.8	25.0	16.4	1.89	0	2	0	0	2	8334879			545357	835	841	Empty	true
Exp1_01	Complement C3 OS=Homo sapiens GN=C3 PE=1 SV=2	CO3_HUMAN	swissprot_2012.fasta	187149	100.0%	108	193	500	3.56%	67.7%	LSINTHPSQKPLSITVR	K	T	99.7%	69.3	25.0	69.3	3.34	0	1	4	3	2	1891.08			5221790	409	425	Empty	true
Exp1_01	Complement C3 OS=Homo sapiens GN=C3 PE=1 SV=2	CO3_HUMAN	swissprot_2012.fasta	187149	100.0%	108	193	500	3.56%	67.7%	LVAYYTLIGASGQR	R	E	99.7%	128	27.6	105	5.31	0	5	7	0	2	1511.82			463602	531	544	Empty	true
Exp1_01	Complement C3 OS=Homo sapiens GN=C3 PE=1 SV=2	CO3_HUMAN	swissprot_2012.fasta	187149	100.0%	108	193	500	3.56%	67.7%	NEQVEIR	R	A	99.7%	54.7	27.1	17.6	0.000	0	2	0	0	2	8874581			116088	842	848	Empty	true
Exp1_01	Complement C3 OS=Homo sapiens GN=C3 PE=1 SV=2	CO3_HUMAN	swissprot_2012.fasta	187149	100.0%	108	193	500	3.56%	67.7%	NKFVTVQATFGTQVVEK	R	V	99.7%	61.0	27.6	44.8	2.35	0	0	2	0	2	1896.02			13532.9	103	119	Empty	true
Exp1_01	Complement C3 OS=Homo sapiens GN=C3 PE=1 SV=2	CO3_HUMAN	swissprot_2012.fasta	187149	100.0%	108	193	500	3.56%	67.7%	NNNEKDMALTAFVLISLQEAK	R	D	99.7%	95.2	29.0	95.2	8.29	0	1	1	0	2	2349.21			70705.1	1135	1155	Empty	true
Exp1_01	Complement C3 OS=Homo sapiens GN=C3 PE=1 SV=2	CO3_HUMAN	swissprot_2012.fasta	187149	100.0%	108	193	500	3.56%	67.7%	NTLIIYLDK	R	V	99.7%	61.8	25.0	42.3	2.34	0	4	0	0	2	1092.63			589507	1442	1450	Empty	true
Exp1_01	Complement C3 OS=Homo sapiens GN=C3 PE=1 SV=2	CO3_HUMAN	swissprot_2012.fasta	187149	100.0%	108	193	500	3.56%	67.7%	QELSEAEQATR	K	T	99.7%	73.7	28.4	58.2	2.55	0	2	0	0	2	1261.6			49409.3	429	439	Empty	true
Exp1_01	Complement C3 OS=Homo sapiens GN=C3 PE=1 SV=2	CO3_HUMAN	swissprot_2012.fasta	187149	100.0%	108	193	500	3.56%	67.7%	QGALELIK	R	K	99.7%	63.1	27.2	16.3	0.000	0	4	0	0	2	8725090			177376	1043	1050	Empty	true
Exp1_01	Complement C3 OS=Homo sapiens GN=C3 PE=1 SV=2	CO3_HUMAN	swissprot_2012.fasta	187149	100.0%	108	193	500	3.56%	67.7%	QGALELIKK	R	G	99.7%	54.8	25.0	27.4	0.000	0	1	0	0	2	9996199			20423.9	1043	1051	Empty	true
Exp1_01	Complement C3 OS=Homo sapiens GN=C3 PE=1 SV=2	CO3_HUMAN	swissprot_2012.fasta	187149	100.0%	108	193	500	3.56%	67.7%	QKPDGVFQEDAPVIHQEMIGGLR	K	N	99.7%	73.6	30.1	2.13	0.000	0	0	4	2	2	2607.29			2066380	1112	1134	Empty	true
Exp1_01	Complement C3 OS=Homo sapiens GN=C3 PE=1 SV=2	CO3_HUMAN	swissprot_2012.fasta	187149	100.0%	108	193	500	3.56%	67.7%	QLANGVDR	K	Y	99.7%	44.2	28.4	33.2	2.30	0	2	0	0	2	8734426			72419	1420	1427	Empty	true
Exp1_01	Complement C3 OS=Homo sapiens GN=C3 PE=1 SV=2	CO3_HUMAN	swissprot_2012.fasta	187149	100.0%	108	193	500	3.56%	67.7%	QLYNVEATSYALLALLQLK	K	D	99.7%	137	25.0	137	10.8	0	1	4	0	2	2151.21			283755	1226	1244	Empty	true
Exp1_01	Complement C3 OS=Homo sapiens GN=C3 PE=1 SV=2	CO3_HUMAN	swissprot_2012.fasta	187149	100.0%	108	193	500	3.56%	67.7%	QLYNVEATSYALLALLQLKDFDFVPPVVR	K	W	99.7%	120	25.0	120	6.55	0	0	1	0	2	3322.81			24731.9	1226	1254	Empty	true
Exp1_01	Complement C3 OS=Homo sapiens GN=C3 PE=1 SV=2	CO3_HUMAN	swissprot_2012.fasta	187149	100.0%	108	193	500	3.56%	67.7%	QPSSAFAAFVK	R	R	99.7%	41.0	27.9	41.0	2.15	0	2	0	0	2	1152.6			193112	1061	1071	Empty	true
Exp1_01	Complement C3 OS=Homo sapiens GN=C3 PE=1 SV=2	CO3_HUMAN	swissprot_2012.fasta	187149	100.0%	108	193	500	3.56%	67.7%	QPSSAFAAFVKR	R	A	98.1%	23.5	27.4	23.5	2.13	0	0	1	0	2	1308.71			13632.6	1061	1072	Empty	true
Exp1_01	Complement C3 OS=Homo sapiens GN=C3 PE=1 SV=2	CO3_HUMAN	swissprot_2012.fasta	187149	100.0%	108	193	500	3.56%	67.7%	QPVPGQQMTLK	R	I	99.7%	54.0	27.1	39.9	2.02	0	3	0	0	2	1226.66			135775	574	584	Empty	true
Exp1_01	Complement C3 OS=Homo sapiens GN=C3 PE=1 SV=2	CO3_HUMAN	swissprot_2012.fasta	187149	100.0%	108	193	500	3.56%	67.7%	QVREPGQDLVVLPLSITTDFIPSFR	R	L	96.5%	18.9	25.1	18.9	1.70	0	0	1	0	2	2827.54			555513	506	530	Empty	true
Exp1_01	Complement C3 OS=Homo sapiens GN=C3 PE=1 SV=2	CO3_HUMAN	swissprot_2012.fasta	187149	100.0%	108	193	500	3.56%	67.7%	RAPSTWLTAYVVK	K	V	99.7%	45.8	25.9	31.7	2.15	0	1	1	0	2	1491.83			93564.7	1072	1084	Empty	true
Exp1_01	Complement C3 OS=Homo sapiens GN=C3 PE=1 SV=2	CO3_HUMAN	swissprot_2012.fasta	187149	100.0%	108	193	500	3.56%	67.7%	RHQQTVTIPPK	R	S	99.7%	58.5	25.3	45.5	1.40	0	0	12	0	2	1304.74			325740	881	891	Empty	true
Exp1_01	Complement C3 OS=Homo sapiens GN=C3 PE=1 SV=2	CO3_HUMAN	swissprot_2012.fasta	187149	100.0%	108	193	500	3.56%	67.7%	RIPIEDGSGEVVLSR	K	K	99.7%	58.2	27.9	33.3	3.68	0	1	2	0	2	1626.88			594819	290	304	Empty	true
Exp1_01	Complement C3 OS=Homo sapiens GN=C3 PE=1 SV=2	CO3_HUMAN	swissprot_2012.fasta	187149	100.0%	108	193	500	3.56%	67.7%	RIPIEDGSGEVVLSRK	K	V	99.7%	67.5	26.5	46.9	6.96	0	0	1	0	2	1754.98			12948.9	290	305	Empty	true
Exp1_01	Complement C3 OS=Homo sapiens GN=C3 PE=1 SV=2	CO3_HUMAN	swissprot_2012.fasta	187149	100.0%	108	193	500	3.56%	67.7%	RQGALELIK	K	K	97.7%	38.1	26.1	0.540	0.000	0	1	0	0	2	1027.63			19989	1042	1050	Empty	true
Exp1_01	Complement C3 OS=Homo sapiens GN=C3 PE=1 SV=2	CO3_HUMAN	swissprot_2012.fasta	187149	100.0%	108	193	500	3.56%	67.7%	SDDKVTLEER	K	L	99.7%	65.3	28.6	46.1	3.27	0	3	0	0	2	1191.59			110306	1523	1532	Empty	true
Exp1_01	Complement C3 OS=Homo sapiens GN=C3 PE=1 SV=2	CO3_HUMAN	swissprot_2012.fasta	187149	100.0%	108	193	500	3.56%	67.7%	SEETKENEGFTVTAEGK	R	G	99.7%	96.3	28.7	83.3	8.20	0	6	11	0	2	1855.86			547577	1321	1337	Empty	true
Exp1_01	Complement C3 OS=Homo sapiens GN=C3 PE=1 SV=2	CO3_HUMAN	swissprot_2012.fasta	187149	100.0%	108	193	500	3.56%	67.7%	SEFPESWLWNVEDLKEPPK	R	N	99.7%	54.5	30.2	54.5	1.26	0	0	2	0	2	2330.13			152558	765	783	Empty	true
Exp1_01	Complement C3 OS=Homo sapiens GN=C3 PE=1 SV=2	CO3_HUMAN	swissprot_2012.fasta	187149	100.0%	108	193	500	3.56%	67.7%	SEFPESWLWNVEDLKEPPKNGISTK	R	L	99.7%	54.3	30.5	8.81	2.51	0	0	1	0	2	2931.44			11443.6	765	789	Empty	true
Exp1_01	Complement C3 OS=Homo sapiens GN=C3 PE=1 SV=2	CO3_HUMAN	swissprot_2012.fasta	187149	100.0%	108	193	500	3.56%	67.7%	SGIPIVTSPYQIHFTK	R	T	99.7%	69.3	27.8	54.5	4.92	0	2	2	0	2	1787.97			448812	344	359	Empty	true
Exp1_01	Complement C3 OS=Homo sapiens GN=C3 PE=1 SV=2	CO3_HUMAN	swissprot_2012.fasta	187149	100.0%	108	193	500	3.56%	67.7%	SGQSEDRQPVPGQQMTLK	K	I	99.7%	58.1	29.7	58.1	7.42	0	2	5	0	2	1985.97			1469090	567	584	Empty	true
Exp1_01	Complement C3 OS=Homo sapiens GN=C3 PE=1 SV=2	CO3_HUMAN	swissprot_2012.fasta	187149	100.0%	108	193	500	3.56%	67.7%	SGSDEVQVGQQR	K	T	99.7%	88.8	27.5	70.6	6.28	0	4	0	0	2	1289.61			397932	1571	1582	Empty	true
Exp1_01	Complement C3 OS=Homo sapiens GN=C3 PE=1 SV=2	CO3_HUMAN	swissprot_2012.fasta	187149	100.0%	108	193	500	3.56%	67.7%	SLYVSATVILHSGSDMVQAER	K	S	99.7%	105	29.8	105	8.23	0	1	14	1	2	2263.14			196084	323	343	Empty	true
Exp1_01	Complement C3 OS=Homo sapiens GN=C3 PE=1 SV=2	CO3_HUMAN	swissprot_2012.fasta	187149	100.0%	108	193	500	3.56%	67.7%	SNLDEDIIAEENIVSR	R	S	99.7%	116	29.8	82.5	5.85	0	6	3	0	2	1816.89			118843	749	764	Empty	true
Exp1_01	Complement C3 OS=Homo sapiens GN=C3 PE=1 SV=2	CO3_HUMAN	swissprot_2012.fasta	187149	100.0%	108	193	500	3.56%	67.7%	SSLSVPYVIVPLK	K	T	99.7%	73.5	25.0	60.9	5.47	0	1	1	0	2	1401.84			534918	892	904	Empty	true
Exp1_01	Complement C3 OS=Homo sapiens GN=C3 PE=1 SV=2	CO3_HUMAN	swissprot_2012.fasta	187149	100.0%	108	193	500	3.56%	67.7%	SYTVAIAGYALAQMGR	R	L	99.7%	82.4	29.8	62.3	6.13	0	16	2	0	2	1671.85			113421	1186	1201	Empty	true
Exp1_01	Complement C3 OS=Homo sapiens GN=C3 PE=1 SV=2	CO3_HUMAN	swissprot_2012.fasta	187149	100.0%	108	193	500	3.56%	67.7%	SYTVAIAGYALAQMGRLKGPLLNK	R	F	99.7%	46.0	25.0	46.0	2.06	0	0	1	0	2	2535.41			23515	1186	1209	Empty	true
Exp1_01	Complement C3 OS=Homo sapiens GN=C3 PE=1 SV=2	CO3_HUMAN	swissprot_2012.fasta	187149	100.0%	108	193	500	3.56%	67.7%	TELRPGETLNVNFLLR	R	M	99.7%	67.2	25.8	55.5	4.55	0	1	2	0	2	1872.03			402080	463	478	Empty	true
Exp1_01	Complement C3 OS=Homo sapiens GN=C3 PE=1 SV=2	CO3_HUMAN	swissprot_2012.fasta	187149	100.0%	108	193	500	3.56%	67.7%	TGLQEVEVK	K	A	99.7%	69.4	28.9	55.0	2.49	0	4	0	0	2	1002.55			495471	905	913	Empty	true
Exp1_01	Complement C3 OS=Homo sapiens GN=C3 PE=1 SV=2	CO3_HUMAN	swissprot_2012.fasta	187149	100.0%	108	193	500	3.56%	67.7%	TGLQEVEVKAAVYHHFISDGVR	K	K	97.0%	23.4	28.8	23.4	1.70	0	0	0	1	2	2455.27			7748.2	905	926	Empty	true
Exp1_01	Complement C3 OS=Homo sapiens GN=C3 PE=1 SV=2	CO3_HUMAN	swissprot_2012.fasta	187149	100.0%	108	193	500	3.56%	67.7%	TGLQEVEVKAAVYHHFISDGVRK	K	S	99.7%	52.4	28.0	52.4	0.000	0	0	0	0	2	2583.37			32311.7	905	927	Empty	true
Exp1_01	Complement C3 OS=Homo sapiens GN=C3 PE=1 SV=2	CO3_HUMAN	swissprot_2012.fasta	187149	100.0%	108	193	500	3.56%	67.7%	TIYTPGSTVLYR	K	I	99.7%	69.4	28.2	69.4	4.19	0	2	0	0	2	1370.73			344785	137	148	Empty	true
Exp1_01	Complement C3 OS=Homo sapiens GN=C3 PE=1 SV=2	CO3_HUMAN	swissprot_2012.fasta	187149	100.0%	108	193	500	3.56%	67.7%	TKKQELSEAEQATR	R	T	99.7%	82.7	29.9	67.0	3.26	0	1	2	0	2	1618.84			301800	426	439	Empty	true
Exp1_01	Complement C3 OS=Homo sapiens GN=C3 PE=1 SV=2	CO3_HUMAN	swissprot_2012.fasta	187149	100.0%	108	193	500	3.56%	67.7%	TMQALPYSTVGNSNNYLHLSVLR	R	T	99.7%	102	29.3	87.9	7.74	0	1	2	1	2	2578.31			410196	440	462	Empty	true
Exp1_01	Complement C3 OS=Homo sapiens GN=C3 PE=1 SV=2	CO3_HUMAN	swissprot_2012.fasta	187149	100.0%	108	193	500	3.56%	67.7%	TVMVNIENPEGIPVK	R	Q	99.7%	94.9	27.7	75.6	4.89	0	3	1	0	2	1639.87			47187.2	162	176	Empty	true
Exp1_01	Complement C3 OS=Homo sapiens GN=C3 PE=1 SV=2	CO3_HUMAN	swissprot_2012.fasta	187149	100.0%	108	193	500	3.56%	67.7%	VEGTAFVIFGIQDGEQR	K	I	99.7%	92.9	30.0	80.0	3.38	0	1	1	0	2	1865.94			54858	265	281	Empty	true
Exp1_01	Complement C3 OS=Homo sapiens GN=C3 PE=1 SV=2	CO3_HUMAN	swissprot_2012.fasta	187149	100.0%	108	193	500	3.56%	67.7%	VHQYFNVELIQPGAVK	K	V	99.7%	75.7	27.7	62.6	5.80	0	3	2	0	2	1841.99			1044650	1463	1478	Empty	true
Exp1_01	Complement C3 OS=Homo sapiens GN=C3 PE=1 SV=2	CO3_HUMAN	swissprot_2012.fasta	187149	100.0%	108	193	500	3.56%	67.7%	VLLDGVQNPR	K	A	99.7%	84.7	25.1	63.0	0.000	0	3	0	0	2	1110.63			437607	306	315	Empty	true
Exp1_01	Complement C3 OS=Homo sapiens GN=C3 PE=1 SV=2	CO3_HUMAN	swissprot_2012.fasta	187149	100.0%	108	193	500	3.56%	67.7%	VPVAVQGEDTVQSLTQGDGVAK	R	L	99.7%	100	29.4	89.4	13.3	0	5	7	0	2	2198.13			1613280	387	408	Empty	true
Exp1_01	Complement C3 OS=Homo sapiens GN=C3 PE=1 SV=2	CO3_HUMAN	swissprot_2012.fasta	187149	100.0%	108	193	500	3.56%	67.7%	VQLSNDFDEYIMAIEQTIK	K	S	99.7%	137	30.1	137	5.70	0	3	1	0	2	2273.1			272491	1552	1570	Empty	true
Exp1_01	Complement C3 OS=Homo sapiens GN=C3 PE=1 SV=2	CO3_HUMAN	swissprot_2012.fasta	187149	100.0%	108	193	500	3.56%	67.7%	VTIKPAPETEK	K	R	99.7%	46.8	25.4	33.8	2.17	0	1	1	0	2	1212.68			163983	1365	1375	Empty	true
Exp1_01	Complement C3 OS=Homo sapiens GN=C3 PE=1 SV=2	CO3_HUMAN	swissprot_2012.fasta	187149	100.0%	108	193	500	3.56%	67.7%	VTIKPAPETEKRPQDAK	K	N	99.7%	37.7	25.2	37.7	2.20	0	1	1	0	2	1908.06			17922.3	1365	1381	Empty	true
Exp1_01	Complement C3 OS=Homo sapiens GN=C3 PE=1 SV=2	CO3_HUMAN	swissprot_2012.fasta	187149	100.0%	108	193	500	3.56%	67.7%	VVLVAVDKGVFVLNK	R	K	99.7%	90.6	25.0	90.6	8.82	0	1	1	0	2	1599.98			11522.3	593	607	Empty	true
Exp1_01	Complement C3 OS=Homo sapiens GN=C3 PE=1 SV=2	CO3_HUMAN	swissprot_2012.fasta	187149	100.0%	108	193	500	3.56%	67.7%	VVLVAVDKGVFVLNKK	R	N	99.7%	39.4	25.0	39.4	4.15	0	0	2	0	2	1728.08			38060.2	593	608	Empty	true
Exp1_01	Complement C3 OS=Homo sapiens GN=C3 PE=1 SV=2	CO3_HUMAN	swissprot_2012.fasta	187149	100.0%	108	193	500	3.56%	67.7%	VVLVSLQSGYLFIQTDK	K	T	99.7%	109	25.4	109	6.05	0	17	6	0	2	1910.06			77663.7	120	136	Empty	true
Exp1_01	Complement C3 OS=Homo sapiens GN=C3 PE=1 SV=2	CO3_HUMAN	swissprot_2012.fasta	187149	100.0%	108	193	500	3.56%	67.7%	YELDKAFSDR	K	N	99.7%	62.3	27.0	43.2	3.25	0	1	1	0	2	1243.6			41831	1432	1441	Empty	true
Exp1_01	Complement C3 OS=Homo sapiens GN=C3 PE=1 SV=2	CO3_HUMAN	swissprot_2012.fasta	187149	100.0%	108	193	500	3.56%	67.7%	YFKPGMPFDLMVFVTNPDGSPAYR	K	V	99.7%	106	30.2	106	8.49	0	2	0	0	2	2749.32			27715.4	363	386	Empty	true
Exp1_01	Complement C3 OS=Homo sapiens GN=C3 PE=1 SV=2	CO3_HUMAN	swissprot_2012.fasta	187149	100.0%	108	193	500	3.56%	67.7%	YISKYELDK	R	A	99.7%	46.2	29.8	22.3	1.82	0	1	0	0	2	1158.6			10895.3	1428	1436	Empty	true
Exp1_01	Complement C3 OS=Homo sapiens GN=C3 PE=1 SV=2	CO3_HUMAN	swissprot_2012.fasta	187149	100.0%	108	193	500	3.56%	67.7%	YISKYELDKAFSDR	R	N	99.7%	42.4	29.8	22.0	3.74	0	0	1	0	2	1734.87			11860.6	1428	1441	Empty	true
Exp1_01	Complement C3 OS=Homo sapiens GN=C3 PE=1 SV=2	CO3_HUMAN	swissprot_2012.fasta	187149	100.0%	108	193	500	3.56%	67.7%	YYGGGYGSTQATFMVFQALAQYQK	R	D	99.7%	112	29.8	112	7.28	0	1	7	0	2	2679.25			128668	1261	1284	Empty	true
Exp1_01	Complement C3 OS=Homo sapiens GN=C3 PE=1 SV=2	CO3_HUMAN	swissprot_2012.fasta	187149	100.0%	108	193	500	3.56%	67.7%	YYTYLIMNK	R	G	99.7%	57.7	28.2	57.7	2.82	0	3	0	0	2	1208.6			393434	489	497	Empty	true
Exp1_01	Ig heavy chain V-I region V35 OS=Homo sapiens PE=1 SV=1	HV103_HUMAN	swissprot_2012.fasta	13008.5	99.8%	2	2	2	0.0143%	21.4%	DTSISTAYMELSR	R	L	99.7%	71.6	27.6	60.6	6.33	0	1	0	0	2	1473.69			9997.88	92	104	Empty	true
Exp1_01	Ig heavy chain V-I region V35 OS=Homo sapiens PE=1 SV=1	HV103_HUMAN	swissprot_2012.fasta	13008.5	99.8%	2	2	2	0.0143%	21.4%	QAPGQGLEWMGR	R	I	99.7%	41.9	27.3	41.9	3.62	0	1	0	0	2	1329.64			11928.4	58	69	Empty	true
Exp1_01	Transthyretin OS=Homo sapiens GN=TTR PE=1 SV=1	TTHY_HUMAN	swissprot_2012.fasta	15886.9	100.0%	5	5	5	0.0356%	34.7%	AADDTWEPFASGK	K	T	99.7%	56.0	26.8	56.0	2.55	0	1	0	0	2	1394.62			15282.1	56	68	Empty	true
Exp1_01	Transthyretin OS=Homo sapiens GN=TTR PE=1 SV=1	TTHY_HUMAN	swissprot_2012.fasta	15886.9	100.0%	5	5	5	0.0356%	34.7%	ALGISPFHEHAEVVFTANDSGPR	K	R	99.7%	46.5	30.3	46.5	4.52	0	0	1	0	2	2451.21			36196.3	101	123	Empty	true
Exp1_01	Transthyretin OS=Homo sapiens GN=TTR PE=1 SV=1	TTHY_HUMAN	swissprot_2012.fasta	15886.9	100.0%	5	5	5	0.0356%	34.7%	ALGISPFHEHAEVVFTANDSGPRR	K	Y	99.2%	28.3	30.0	13.4	2.09	0	0	0	1	2	2607.31			39773.8	101	124	Empty	true
Exp1_01	Transthyretin OS=Homo sapiens GN=TTR PE=1 SV=1	TTHY_HUMAN	swissprot_2012.fasta	15886.9	100.0%	5	5	5	0.0356%	34.7%	GSPAINVAVHVFR	R	K	99.7%	37.3	26.0	25.7	1.11	0	0	1	0	2	1366.76			31282.4	42	54	Empty	true
Exp1_01	Transthyretin OS=Homo sapiens GN=TTR PE=1 SV=1	TTHY_HUMAN	swissprot_2012.fasta	15886.9	100.0%	5	5	5	0.0356%	34.7%	KAADDTWEPFASGK	R	T	99.7%	39.3	29.2	26.3	2.85	0	1	0	0	2	1522.72			11580.5	55	68	Empty	true
Exp1_01	Integrin-linked protein kinase OS=Homo sapiens GN=ILK PE=1 SV=2	ILK_HUMAN	swissprot_2012.fasta	51419.7	100.0%	4	4	4	0.0285%	9.73%	GDDTPLHLAASHGHR	R	D	99.7%	43.5	28.7	43.5	2.38	0	0	1	0	2	1583.77			6824.13	66	80	Empty	true
Exp1_01	Integrin-linked protein kinase OS=Homo sapiens GN=ILK PE=1 SV=2	ILK_HUMAN	swissprot_2012.fasta	51419.7	100.0%	4	4	4	0.0285%	9.73%	MYAPAWVAPEALQK	R	K	99.7%	61.6	30.0	61.6	6.33	0	1	0	0	2	1574.8			16890.7	350	363	Empty	true
Exp1_01	Integrin-linked protein kinase OS=Homo sapiens GN=ILK PE=1 SV=2	ILK_HUMAN	swissprot_2012.fasta	51419.7	100.0%	4	4	4	0.0285%	9.73%	QLNFLTK	K	L	97.4%	36.5	25.0	22.5	0.000	0	1	0	0	2	8634986			16124.9	192	198	Empty	true
Exp1_01	Integrin-linked protein kinase OS=Homo sapiens GN=ILK PE=1 SV=2	ILK_HUMAN	swissprot_2012.fasta	51419.7	100.0%	4	4	4	0.0285%	9.73%	YGEMPVDK	K	A	99.7%	44.3	25.1	12.6	1.82	0	1	0	0	2	9384289			7435.14	132	139	Empty	true
Exp1_01	Heat shock cognate 71 kDa protein OS=Homo sapiens GN=HSPA8 PE=1 SV=1	HSP7C_HUMAN	swissprot_2012.fasta	70899.8	100.0%	3	3	3	0.0214%	6.35%	MKEIAEAYLGK	K	T	99.1%	40.8	28.0	25.7	0.000	0	0	1	0	2	1252.66			10665.9	127	137	Empty	true
Exp1_01	Heat shock cognate 71 kDa protein OS=Homo sapiens GN=HSPA8 PE=1 SV=1	HSP7C_HUMAN	swissprot_2012.fasta	70899.8	100.0%	3	3	3	0.0214%	6.35%	SQIHDIVLVGGSTR	K	I	99.0%	23.3	27.1	11.9	2.68	0	0	1	0	2	1481.81			4324.88	329	342	Empty	true
Exp1_01	Heat shock cognate 71 kDa protein OS=Homo sapiens GN=HSPA8 PE=1 SV=1	HSP7C_HUMAN	swissprot_2012.fasta	70899.8	100.0%	3	3	3	0.0214%	6.35%	STAGDTHLGGEDFDNR	K	M	99.7%	49.1	25.0	49.1	1.57	0	0	1	0	2	1691.73			7525.04	221	236	Empty	true
Exp1_01	Complement C1q subcomponent subunit C OS=Homo sapiens GN=C1QC PE=1 SV=3	C1QC_HUMAN	swissprot_2012.fasta	25774	100.0%	6	11	17	0.121%	33.1%	FNAVLTNPQGDYDTSTGK	R	F	99.7%	82.0	29.1	82.0	5.85	0	4	1	0	2	1927.9			786400	140	157	Empty	true
Exp1_01	Complement C1q subcomponent subunit C OS=Homo sapiens GN=C1QC PE=1 SV=3	C1QC_HUMAN	swissprot_2012.fasta	25774	100.0%	6	11	17	0.121%	33.1%	FQSVFTVTR	K	Q	99.7%	52.4	27.3	35.6	1.28	0	2	0	0	2	1084.58			377046	118	126	Empty	true
Exp1_01	Complement C1q subcomponent subunit C OS=Homo sapiens GN=C1QC PE=1 SV=3	C1QC_HUMAN	swissprot_2012.fasta	25774	100.0%	6	11	17	0.121%	33.1%	NGPMGPPGMPGVPGPMGIPGEPGEEGR	K	Y	99.7%	25.5	27.8	25.5	6.80	0	1	0	0	2	2619.16			6800.58	87	113	Empty	true
Exp1_01	Complement C1q subcomponent subunit C OS=Homo sapiens GN=C1QC PE=1 SV=3	C1QC_HUMAN	swissprot_2012.fasta	25774	100.0%	6	11	17	0.121%	33.1%	QKFQSVFTVTR	K	Q	99.7%	43.0	27.2	43.0	2.30	0	1	0	0	2	1340.73			23837.7	116	126	Empty	true
Exp1_01	Complement C1q subcomponent subunit C OS=Homo sapiens GN=C1QC PE=1 SV=3	C1QC_HUMAN	swissprot_2012.fasta	25774	100.0%	6	11	17	0.121%	33.1%	QTHQPPAPNSLIR	R	F	99.7%	40.7	29.3	28.0	3.19	0	2	2	0	2	1458.78			544289	127	139	Empty	true
Exp1_01	Complement C1q subcomponent subunit C OS=Homo sapiens GN=C1QC PE=1 SV=3	C1QC_HUMAN	swissprot_2012.fasta	25774	100.0%	6	11	17	0.121%	33.1%	TNQVNSGGVLLR	K	L	99.7%	42.8	28.5	30.2	2.89	0	3	1	0	2	1257.69			65846.9	199	210	Empty	true
Exp1_01	Serum amyloid A-4 protein OS=Homo sapiens GN=SAA4 PE=1 SV=2	SAA4_HUMAN	swissprot_2012.fasta	14747.2	100.0%	4	5	6	0.0428%	34.6%	AYWDIMISNHQNSNR	R	Y	99.7%	64.9	28.4	64.9	4.80	0	1	2	0	2	1848.84			10771.1	38	52	Empty	true
Exp1_01	Serum amyloid A-4 protein OS=Homo sapiens GN=SAA4 PE=1 SV=2	SAA4_HUMAN	swissprot_2012.fasta	14747.2	100.0%	4	5	6	0.0428%	34.6%	EALQGVGDMGR	K	A	99.7%	55.8	28.9	55.8	2.77	0	1	0	0	2	1132.54			69680.5	27	37	Empty	true
Exp1_01	Serum amyloid A-4 protein OS=Homo sapiens GN=SAA4 PE=1 SV=2	SAA4_HUMAN	swissprot_2012.fasta	14747.2	100.0%	4	5	6	0.0428%	34.6%	GPGGVWAAK	R	L	99.7%	55.6	25.3	40.8	3.46	0	1	0	0	2	8424520			82506.6	66	74	Empty	true
Exp1_01	Serum amyloid A-4 protein OS=Homo sapiens GN=SAA4 PE=1 SV=2	SAA4_HUMAN	swissprot_2012.fasta	14747.2	100.0%	4	5	6	0.0428%	34.6%	SNEKAEEWGR	K	S	99.7%	54.7	27.1	32.8	1.68	0	1	0	0	2	1205.55			10520.6	104	113	Empty	true
Exp1_01	Dermcidin OS=Homo sapiens GN=DCD PE=1 SV=2	DCD_HUMAN	swissprot_2012.fasta	11284.1	99.8%	2	2	2	0.0143%	22.7%	ENAGEDPGLAR	K	Q	99.7%	60.7	26.2	60.7	3.46	0	1	0	0	2	1128.53			10077.3	43	53	Empty	true
Exp1_01	Dermcidin OS=Homo sapiens GN=DCD PE=1 SV=2	DCD_HUMAN	swissprot_2012.fasta	11284.1	99.8%	2	2	2	0.0143%	22.7%	LGKDAVEDLESVGK	K	G	99.7%	55.3	29.7	32.3	1.77	0	0	1	0	2	1459.76			54178	83	96	Empty	true
Exp1_01	Apolipoprotein C-II OS=Homo sapiens GN=APOC2 PE=1 SV=1	APOC2_HUMAN	swissprot_2012.fasta	11284.1	100.0%	5	8	8	0.0570%	52.5%	ESLSSYWESAK	K	T	99.7%	56.0	25.0	56.0	2.82	0	1	0	0	2	1286.59			701038	42	52	Empty	true
Exp1_01	Apolipoprotein C-II OS=Homo sapiens GN=APOC2 PE=1 SV=1	APOC2_HUMAN	swissprot_2012.fasta	11284.1	100.0%	5	8	8	0.0570%	52.5%	STAAMSTYTGIFTDQVLSVLK	K	G	99.7%	137	30.0	127	9.00	0	1	1	0	2	2233.14			205830	78	98	Empty	true
Exp1_01	Apolipoprotein C-II OS=Homo sapiens GN=APOC2 PE=1 SV=1	APOC2_HUMAN	swissprot_2012.fasta	11284.1	100.0%	5	8	8	0.0570%	52.5%	STAAMSTYTGIFTDQVLSVLKGEE	K	-	99.7%	104	30.4	85.2	12.1	0	1	1	0	2	2548.25			46109.4	78	101	Empty	true
Exp1_01	Apolipoprotein C-II OS=Homo sapiens GN=APOC2 PE=1 SV=1	APOC2_HUMAN	swissprot_2012.fasta	11284.1	100.0%	5	8	8	0.0570%	52.5%	TAAQNLYEK	K	T	99.7%	47.0	27.1	35.3	1.80	0	2	0	0	2	1037.53			113876	53	61	Empty	true
Exp1_01	Apolipoprotein C-II OS=Homo sapiens GN=APOC2 PE=1 SV=1	APOC2_HUMAN	swissprot_2012.fasta	11284.1	100.0%	5	8	8	0.0570%	52.5%	TYLPAVDEK	K	L	97.5%	24.5	27.5	24.5	2.01	0	1	0	0	2	1035.54			35631.5	62	70	Empty	true
Exp1_01	14-3-3 protein zeta/delta OS=Homo sapiens GN=YWHAZ PE=1 SV=1	1433Z_HUMAN	swissprot_2012.fasta	27745.9	100.0%	5	8	8	0.0570%	24.9%	GIVDQSQQAYQEAFEISK	K	K	99.7%	100	29.7	89.9	7.70	0	1	1	0	2	2040.99			14959.6	140	157	Empty	true
Exp1_01	14-3-3 protein zeta/delta OS=Homo sapiens GN=YWHAZ PE=1 SV=1	1433Z_HUMAN	swissprot_2012.fasta	27745.9	100.0%	5	8	8	0.0570%	24.9%	MDKNELVQK	-	A	98.9%	32.2	29.5	32.2	1.54	0	1	0	0	2	1146.58			55555.5	1	9	Empty	true
Exp1_01	14-3-3 protein zeta/delta OS=Homo sapiens GN=YWHAZ PE=1 SV=1	1433Z_HUMAN	swissprot_2012.fasta	27745.9	100.0%	5	8	8	0.0570%	24.9%	NLLSVAYK	R	N	99.6%	44.6	25.0	19.5	0.000	0	1	0	0	2	9075247			30700.9	42	49	Empty	true	1433T_HUMAN1433B_HUMAN1433G_HUMAN1433E_HUMAN1433F_HUMAN
Exp1_01	14-3-3 protein zeta/delta OS=Homo sapiens GN=YWHAZ PE=1 SV=1	1433Z_HUMAN	swissprot_2012.fasta	27745.9	100.0%	5	8	8	0.0570%	24.9%	SVTEQGAELSNEER	K	N	99.7%	107	27.8	93.4	4.00	0	1	1	0	2	1548.71			25483.2	28	41	Empty	true
Exp1_01	14-3-3 protein zeta/delta OS=Homo sapiens GN=YWHAZ PE=1 SV=1	1433Z_HUMAN	swissprot_2012.fasta	27745.9	100.0%	5	8	8	0.0570%	24.9%	YLAEVAAGDDKK	R	G	99.7%	53.0	29.2	32.3	0.000	0	1	1	0	2	1279.65			37519.5	128	139	Empty	true
Exp1_01	Ras suppressor protein 1 OS=Homo sapiens GN=RSU1 PE=1 SV=3	RSU1_HUMAN	swissprot_2012.fasta	31542.2	99.9%	2	2	2	0.0143%	5.78%	DNDLISLPK	R	E	96.4%	37.0	26.9	18.9	0.000	0	1	0	0	2	1014.55			9121.56	166	174	Empty	true
Exp1_01	Ras suppressor protein 1 OS=Homo sapiens GN=RSU1 PE=1 SV=3	RSU1_HUMAN	swissprot_2012.fasta	31542.2	99.9%	2	2	2	0.0143%	5.78%	LQILSLR	K	D	99.7%	45.1	25.0	14.2	0.000	0	1	0	0	2	8425459			17329.1	159	165	Empty	true
Exp1_01	Complement component C8 gamma chain OS=Homo sapiens GN=C8G PE=1 SV=3	CO8G_HUMAN	swissprot_2012.fasta	22277.3	100.0%	6	7	7	0.0499%	41.1%	AEATTLHVAPQGTAMAVSTFR	R	K	99.7%	67.7	30.0	57.5	4.62	0	0	1	0	2	2159.09			42783.7	70	90	Empty	true
Exp1_01	Complement component C8 gamma chain OS=Homo sapiens GN=C8G PE=1 SV=3	CO8G_HUMAN	swissprot_2012.fasta	22277.3	100.0%	6	7	7	0.0499%	41.1%	FLQEQGHR	R	A	98.1%	40.0	27.2	24.4	0.000	0	1	0	0	2	1014.51			25777.6	62	69	Empty	true
Exp1_01	Complement component C8 gamma chain OS=Homo sapiens GN=C8G PE=1 SV=3	CO8G_HUMAN	swissprot_2012.fasta	22277.3	100.0%	6	7	7	0.0499%	41.1%	QLYGDTGVLGR	R	F	99.7%	67.4	28.5	67.4	2.80	0	1	0	0	2	1178.62			80164.5	101	111	Empty	true
Exp1_01	Complement component C8 gamma chain OS=Homo sapiens GN=C8G PE=1 SV=3	CO8G_HUMAN	swissprot_2012.fasta	22277.3	100.0%	6	7	7	0.0499%	41.1%	RPASPISTIQPK	R	A	99.7%	33.8	25.0	33.8	2.24	0	0	1	0	2	1294.75			31889.8	28	39	Empty	true
Exp1_01	Complement component C8 gamma chain OS=Homo sapiens GN=C8G PE=1 SV=3	CO8G_HUMAN	swissprot_2012.fasta	22277.3	100.0%	6	7	7	0.0499%	41.1%	SLPVSDSVLSGFEQR	R	V	99.7%	97.6	29.9	81.2	6.77	0	1	0	0	2	1620.82			14038.7	154	168	Empty	true
Exp1_01	Complement component C8 gamma chain OS=Homo sapiens GN=C8G PE=1 SV=3	CO8G_HUMAN	swissprot_2012.fasta	22277.3	100.0%	6	7	7	0.0499%	41.1%	VQEAHLTEDQIFYFPK	R	Y	99.7%	62.5	29.8	47.1	1.82	0	1	1	0	2	1964.98			29609.5	169	184	Empty	true
Exp1_01	Mannan-binding lectin serine protease 1 OS=Homo sapiens GN=MASP1 PE=1 SV=3	MASP1_HUMAN	swissprot_2012.fasta	79247.4	100.0%	2	2	2	0.0143%	5.72%	APEPISTQSHSVLILFHSDNSGENR	K	G	99.7%	47.7	30.3	47.7	2.39	0	0	0	1	2	2735.34			54763.1	264	288	Empty	true
Exp1_01	Mannan-binding lectin serine protease 1 OS=Homo sapiens GN=MASP1 PE=1 SV=3	MASP1_HUMAN	swissprot_2012.fasta	79247.4	100.0%	2	2	2	0.0143%	5.72%	APGELEHGLITFSTR	R	N	99.7%	57.6	28.8	57.6	3.92	0	0	1	0	2	1627.84			17755.1	369	383	Empty	true
Exp1_01	Complement component C8 alpha chain OS=Homo sapiens GN=C8A PE=1 SV=2	CO8A_HUMAN	swissprot_2012.fasta	65163.8	100.0%	5	5	5	0.0356%	6.34%	AMAVEDIISR	K	V	99.7%	76.5	29.6	39.7	1.66	0	1	0	0	2	1104.57			11210.3	413	422	Empty	true
Exp1_01	Complement component C8 alpha chain OS=Homo sapiens GN=C8A PE=1 SV=2	CO8A_HUMAN	swissprot_2012.fasta	65163.8	100.0%	5	5	5	0.0356%	6.34%	HTSLGPLEAK	R	R	99.7%	53.0	26.2	36.3	1.85	0	1	0	0	2	1052.57			53984.2	470	479	Empty	true
Exp1_01	Complement component C8 alpha chain OS=Homo sapiens GN=C8A PE=1 SV=2	CO8A_HUMAN	swissprot_2012.fasta	65163.8	100.0%	5	5	5	0.0356%	6.34%	KAMAVEDIISR	R	V	99.7%	36.6	29.0	9.79	1.14	0	0	1	0	2	1232.67			23352.6	412	422	Empty	true
Exp1_01	Complement component C8 alpha chain OS=Homo sapiens GN=C8A PE=1 SV=2	CO8A_HUMAN	swissprot_2012.fasta	65163.8	100.0%	5	5	5	0.0356%	6.34%	MESLGITSR	K	D	99.7%	61.7	28.2	32.9	3.18	0	1	0	0	2	9935034			86003.1	362	370	Empty	true
Exp1_01	Complement component C8 alpha chain OS=Homo sapiens GN=C8A PE=1 SV=2	CO8A_HUMAN	swissprot_2012.fasta	65163.8	100.0%	5	5	5	0.0356%	6.34%	SLLQPNK	R	F	97.3%	36.3	25.1	12.3	0.000	0	1	0	0	2	7994673			46089	62	68	Empty	true
Exp1_01	Alpha-enolase OS=Homo sapiens GN=ENO1 PE=1 SV=2	ENOA_HUMAN	swissprot_2012.fasta	47170.2	99.8%	2	2	2	0.0143%	5.76%	GNPTVEVDLFTSK	R	G	99.7%	44.1	29.4	18.1	1.24	0	1	0	0	2	1406.72			6931.82	16	28	Empty	true
Exp1_01	Alpha-enolase OS=Homo sapiens GN=ENO1 PE=1 SV=2	ENOA_HUMAN	swissprot_2012.fasta	47170.2	99.8%	2	2	2	0.0143%	5.76%	YISPDQLADLYK	R	S	99.7%	41.6	28.5	28.9	2.37	0	1	0	0	2	1425.73			3233.52	270	281	Empty	true
Exp1_01	Solute carrier family 2 facilitated glucose transporter member 3 OS=Homo sapiens GN=SLC2A3 PE=1 SV=1	GTR3_HUMAN	swissprot_2012.fasta	53926	100.0%	3	3	3	0.0214%	8.06%	AFEGQAHGADR	R	S	99.7%	51.1	25.0	51.1	3.17	0	1	0	0	2	1158.53			3095.9	464	474	Empty	true
Exp1_01	Solute carrier family 2 facilitated glucose transporter member 3 OS=Homo sapiens GN=SLC2A3 PE=1 SV=1	GTR3_HUMAN	swissprot_2012.fasta	53926	100.0%	3	3	3	0.0214%	8.06%	LWGTQDVSQDIQEMKDESAR	R	M	99.7%	66.3	29.1	66.3	4.09	0	0	1	0	2	2336.08			29323.8	229	248	Empty	true
Exp1_01	Solute carrier family 2 facilitated glucose transporter member 3 OS=Homo sapiens GN=SLC2A3 PE=1 SV=1	GTR3_HUMAN	swissprot_2012.fasta	53926	100.0%	3	3	3	0.0214%	8.06%	SVEMLILGR	K	L	99.3%	44.5	27.4	31.0	0.000	0	1	0	0	2	1017.58			4553.72	116	124	Empty	true
Exp1_01	Alpha-2-HS-glycoprotein OS=Homo sapiens GN=AHSG PE=1 SV=1	FETUA_HUMAN	swissprot_2012.fasta	39323.4	99.8%	2	2	3	0.0214%	7.36%	FSVVYAK	K	C	99.7%	42.8	25.6	28.6	1.80	0	1	0	0	2	8134504			67372	125	131	Empty	true
Exp1_01	Alpha-2-HS-glycoprotein OS=Homo sapiens GN=AHSG PE=1 SV=1	FETUA_HUMAN	swissprot_2012.fasta	39323.4	99.8%	2	2	3	0.0214%	7.36%	HTFMGVVSLGSPSGEVSHPR	R	K	99.7%	84.6	29.9	84.6	4.40	0	0	2	0	2	2081.02			82712.6	318	337	Empty	true
Exp1_01	Properdin OS=Homo sapiens GN=CFP PE=1 SV=2	PROP_HUMAN	swissprot_2012.fasta	51274.1	99.8%	2	2	4	0.0285%	4.90%	CAGQQQDIR	R	H	98.6%	27.1	25.0	4.45	1.72	0	1	0	0	2	1076.48			4156.27	360	368	Empty	true
Exp1_01	Properdin OS=Homo sapiens GN=CFP PE=1 SV=2	PROP_HUMAN	swissprot_2012.fasta	51274.1	99.8%	2	2	4	0.0285%	4.90%	YPPTVSMVEGQGEK	K	N	99.7%	59.9	29.4	39.9	0.000	0	3	0	0	2	1521.73			16217.3	414	427	Empty	true
Exp1_01	Profilin-1 OS=Homo sapiens GN=PFN1 PE=1 SV=2	PROF1_HUMAN	swissprot_2012.fasta	15054.3	99.9%	2	2	2	0.0143%	15.7%	STGGAPTFNVTVTK	K	T	99.7%	52.5	28.8	40.5	4.23	0	1	0	0	2	1379.72			8516.95	92	105	Empty	true
Exp1_01	Profilin-1 OS=Homo sapiens GN=PFN1 PE=1 SV=2	PROF1_HUMAN	swissprot_2012.fasta	15054.3	99.9%	2	2	2	0.0143%	15.7%	TLVLLMGK	K	E	99.7%	63.7	25.0	48.6	1.28	0	1	0	0	2	8745432			33890.6	109	116	Empty	true
Exp1_01	Apolipoprotein L1 OS=Homo sapiens GN=APOL1 PE=1 SV=5	APOL1_HUMAN	swissprot_2012.fasta	43975.3	100.0%	4	4	4	0.0285%	14.3%	LTDVAPVSFFLVLDVVYLVYESK	K	H	99.7%	36.3	25.0	36.3	3.31	0	0	1	0	2	2616.42			1450.27	335	357	Empty	true
Exp1_01	Apolipoprotein L1 OS=Homo sapiens GN=APOL1 PE=1 SV=5	APOL1_HUMAN	swissprot_2012.fasta	43975.3	100.0%	4	4	4	0.0285%	14.3%	VAQELEEK	K	L	99.7%	54.0	28.9	26.7	1.46	0	1	0	0	2	9454888			36931.2	374	381	Empty	true
Exp1_01	Apolipoprotein L1 OS=Homo sapiens GN=APOL1 PE=1 SV=5	APOL1_HUMAN	swissprot_2012.fasta	43975.3	100.0%	4	4	4	0.0285%	14.3%	VNEPSILEMSR	R	G	99.7%	37.1	29.7	37.1	2.30	0	1	0	0	2	1274.64			77185.8	321	331	Empty	true
Exp1_01	Apolipoprotein L1 OS=Homo sapiens GN=APOL1 PE=1 SV=5	APOL1_HUMAN	swissprot_2012.fasta	43975.3	100.0%	4	4	4	0.0285%	14.3%	VTEPISAESGEQVER	R	V	99.7%	99.0	29.7	99.0	5.74	0	1	0	0	2	1630.79			5841.04	306	320	Empty	true
Exp1_01	Tropomyosin alpha-4 chain OS=Homo sapiens GN=TPM4 PE=1 SV=3	TPM4_HUMAN	swissprot_2012.fasta	28522.4	100.0%	8	9	9	0.0641%	35.5%	AGLNSLEAVKR	M	K	99.7%	41.0	28.6	21.4	1.70	0	1	0	0	1	1199.67			21613.3	2	12	Empty	true
Exp1_01	Tropomyosin alpha-4 chain OS=Homo sapiens GN=TPM4 PE=1 SV=3	TPM4_HUMAN	swissprot_2012.fasta	28522.4	100.0%	8	9	9	0.0641%	35.5%	HIAEEADRKYEEVAR	K	K	97.2%	24.6	29.7	24.6	1.11	0	0	0	1	2	1815.9			32914.2	117	131	Empty	true	TPM3_HUMAN
Exp1_01	Tropomyosin alpha-4 chain OS=Homo sapiens GN=TPM4 PE=1 SV=3	TPM4_HUMAN	swissprot_2012.fasta	28522.4	100.0%	8	9	9	0.0641%	35.5%	IQALQQQADEAEDR	K	A	99.7%	104	28.8	104	6.00	0	1	0	0	2	1614.77			5117	14	27	Empty	true
Exp1_01	Tropomyosin alpha-4 chain OS=Homo sapiens GN=TPM4 PE=1 SV=3	TPM4_HUMAN	swissprot_2012.fasta	28522.4	100.0%	8	9	9	0.0641%	35.5%	IQLVEEELDR	R	A	99.7%	72.0	29.4	53.3	0.000	0	1	0	0	2	1243.65			8851.57	56	65	Empty	true	TPM3_HUMAN
Exp1_01	Tropomyosin alpha-4 chain OS=Homo sapiens GN=TPM4 PE=1 SV=3	TPM4_HUMAN	swissprot_2012.fasta	28522.4	100.0%	8	9	9	0.0641%	35.5%	KIQALQQQADEAEDR	R	A	99.7%	52.3	29.3	52.3	4.04	0	0	1	0	2	1742.87			10283.1	13	27	Empty	true
Exp1_01	Tropomyosin alpha-4 chain OS=Homo sapiens GN=TPM4 PE=1 SV=3	TPM4_HUMAN	swissprot_2012.fasta	28522.4	100.0%	8	9	9	0.0641%	35.5%	KLVILEGELER	R	A	99.7%	33.2	25.0	22.5	2.10	0	0	1	0	2	1298.77			3454.97	132	142	Empty	true
Exp1_01	Tropomyosin alpha-4 chain OS=Homo sapiens GN=TPM4 PE=1 SV=3	TPM4_HUMAN	swissprot_2012.fasta	28522.4	100.0%	8	9	9	0.0641%	35.5%	LEEAEKAADESER	K	G	99.7%	59.5	27.7	45.0	3.80	0	1	1	0	2	1476.68			20978.6	77	89	Empty	true	TPM3_HUMAN
Exp1_01	Tropomyosin alpha-4 chain OS=Homo sapiens GN=TPM4 PE=1 SV=3	TPM4_HUMAN	swissprot_2012.fasta	28522.4	100.0%	8	9	9	0.0641%	35.5%	YSEKEDKYEEEIK	K	L	99.5%	29.1	28.5	0.000	3.44	0	0	1	0	2	1689.79			7635.5	178	190	Empty	true
Exp1_01	HLA class I histocompatibility antigen A-68 alpha chain OS=Homo sapiens GN=HLA-A PE=1 SV=4	1A68_HUMAN	swissprot_2012.fasta	40908.2	100.0%	4	4	4	0.0285%	18.4%	APWIEQEGPEYWDR	R	N	99.7%	57.9	27.7	44.2	5.62	0	1	0	0	2	1775.8			6403.22	73	86	Empty	true	1B53_HUMAN1B35_HUMAN
Exp1_01	HLA class I histocompatibility antigen A-68 alpha chain OS=Homo sapiens GN=HLA-A PE=1 SV=4	1A68_HUMAN	swissprot_2012.fasta	40908.2	100.0%	4	4	4	0.0285%	18.4%	DGEDQTQDTELVETRPAGDGTFQK	R	W	99.7%	55.0	28.5	16.2	2.68	0	0	1	0	2	2637.19			8230.26	244	267	Empty	true
Exp1_01	HLA class I histocompatibility antigen A-68 alpha chain OS=Homo sapiens GN=HLA-A PE=1 SV=4	1A68_HUMAN	swissprot_2012.fasta	40908.2	100.0%	4	4	4	0.0285%	18.4%	SWTAADMAAQTTK	R	H	99.7%	65.3	27.9	54.2	2.77	0	1	0	0	2	1381.64			5611.71	156	168	Empty	true
Exp1_01	HLA class I histocompatibility antigen A-68 alpha chain OS=Homo sapiens GN=HLA-A PE=1 SV=4	1A68_HUMAN	swissprot_2012.fasta	40908.2	100.0%	4	4	4	0.0285%	18.4%	THMTHHAVSDHEATLR	K	C	99.7%	52.1	28.8	52.1	0.000	0	0	0	1	2	1842.87			40362	211	226	Empty	true
Exp1_01	Antithrombin-III OS=Homo sapiens GN=SERPINC1 PE=1 SV=1	ANT3_HUMAN	swissprot_2012.fasta	52604.1	100.0%	3	3	3	0.0214%	10.6%	ANRPFLVFIR	K	E	99.6%	28.6	25.0	10.6	1.25	0	0	1	0	2	1232.73			8892.78	436	445	Empty	true
Exp1_01	Antithrombin-III OS=Homo sapiens GN=SERPINC1 PE=1 SV=1	ANT3_HUMAN	swissprot_2012.fasta	52604.1	100.0%	3	3	3	0.0214%	10.6%	ATEDEGSEQKIPEATNR	K	R	99.5%	31.5	29.1	17.9	3.38	0	0	1	0	2	1874.87			7106.41	62	78	Empty	true
Exp1_01	Antithrombin-III OS=Homo sapiens GN=SERPINC1 PE=1 SV=1	ANT3_HUMAN	swissprot_2012.fasta	52604.1	100.0%	3	3	3	0.0214%	10.6%	SKLPGIVAEGRDDLYVSDAFHK	K	A	97.0%	24.4	29.7	24.4	1.11	0	0	0	1	2	2417.25			21206.7	381	402	Empty	true
Exp1_01	Platelet glycoprotein Ib alpha chain OS=Homo sapiens GN=GP1BA PE=1 SV=1	GP1BA_HUMAN	swissprot_2012.fasta	68957.9	100.0%	4	4	4	0.0285%	7.19%	GLGELQELYLK	R	G	99.7%	62.8	27.1	43.9	3.35	0	1	0	0	2	1262.7			6085.06	138	148	Empty	true
Exp1_01	Platelet glycoprotein Ib alpha chain OS=Homo sapiens GN=GP1BA PE=1 SV=1	GP1BA_HUMAN	swissprot_2012.fasta	68957.9	100.0%	4	4	4	0.0285%	7.19%	GQDLLSTVSIR	R	Y	99.7%	60.9	28.7	45.5	3.19	0	1	0	0	2	1188.66			4413.91	610	620	Empty	true
Exp1_01	Platelet glycoprotein Ib alpha chain OS=Homo sapiens GN=GP1BA PE=1 SV=1	GP1BA_HUMAN	swissprot_2012.fasta	68957.9	100.0%	4	4	4	0.0285%	7.19%	LTSLPLGALR	R	G	99.7%	37.6	25.0	37.6	2.57	0	1	0	0	2	1040.65			19359.5	128	137	Empty	true
Exp1_01	Platelet glycoprotein Ib alpha chain OS=Homo sapiens GN=GP1BA PE=1 SV=1	GP1BA_HUMAN	swissprot_2012.fasta	68957.9	100.0%	4	4	4	0.0285%	7.19%	WLQDNAENVYVWK	R	Q	99.7%	50.0	29.6	50.0	3.57	0	1	0	0	2	1664.81			9159.05	235	247	Empty	true
Exp1_01	Intelectin-1 OS=Homo sapiens GN=ITLN1 PE=1 SV=1	ITLN1_HUMAN	swissprot_2012.fasta	34961.8	100.0%	5	5	5	0.0356%	18.2%	DLGIWHVPNK	K	S	99.7%	44.8	28.4	44.8	2.59	0	1	0	0	2	1178.63			7595.54	146	155	Empty	true
Exp1_01	Intelectin-1 OS=Homo sapiens GN=ITLN1 PE=1 SV=1	ITLN1_HUMAN	swissprot_2012.fasta	34961.8	100.0%	5	5	5	0.0356%	18.2%	EFTAGFVQFR	R	V	99.7%	53.0	28.7	53.0	3.12	0	1	0	0	2	1201.6			18100	230	239	Empty	true
Exp1_01	Intelectin-1 OS=Homo sapiens GN=ITLN1 PE=1 SV=1	ITLN1_HUMAN	swissprot_2012.fasta	34961.8	100.0%	5	5	5	0.0356%	18.2%	SPMQHWR	K	N	98.3%	38.2	25.0	19.2	0.000	0	1	0	0	2	9414410			11775.1	156	162	Empty	true
Exp1_01	Intelectin-1 OS=Homo sapiens GN=ITLN1 PE=1 SV=1	ITLN1_HUMAN	swissprot_2012.fasta	34961.8	100.0%	5	5	5	0.0356%	18.2%	TASYYSPYGQR	K	E	99.1%	43.2	27.3	43.2	0.000	0	1	0	0	2	1292.59			10537.1	219	229	Empty	true
Exp1_01	Intelectin-1 OS=Homo sapiens GN=ITLN1 PE=1 SV=1	ITLN1_HUMAN	swissprot_2012.fasta	34961.8	100.0%	5	5	5	0.0356%	18.2%	TDTGFLQTLGHNLFGIYQK	R	Y	99.7%	55.4	29.3	55.4	2.24	0	0	1	0	2	2153.1			27569.2	171	189	Empty	true
Exp1_01	Integrin beta-3 OS=Homo sapiens GN=ITGB3 PE=1 SV=2	ITB3_HUMAN	swissprot_2012.fasta	87057.7	100.0%	7	8	8	0.0570%	8.63%	GSGDSSQVTQVSPQR	K	I	99.7%	64.1	29.2	40.3	4.59	0	1	0	0	2	1532.73			3144.57	99	113	Empty	true
Exp1_01	Integrin beta-3 OS=Homo sapiens GN=ITGB3 PE=1 SV=2	ITB3_HUMAN	swissprot_2012.fasta	87057.7	100.0%	7	8	8	0.0570%	8.63%	HVLTLTDQVTR	K	F	99.7%	39.8	26.4	39.8	2.77	0	1	0	0	2	1282.71			24749.7	218	228	Empty	true
Exp1_01	Integrin beta-3 OS=Homo sapiens GN=ITGB3 PE=1 SV=2	ITB3_HUMAN	swissprot_2012.fasta	87057.7	100.0%	7	8	8	0.0570%	8.63%	NDASHLLVFTTDAK	R	T	99.7%	62.4	29.7	62.4	5.68	0	1	1	0	2	1531.78			13810.3	266	279	Empty	true
Exp1_01	Integrin beta-3 OS=Homo sapiens GN=ITGB3 PE=1 SV=2	ITB3_HUMAN	swissprot_2012.fasta	87057.7	100.0%	7	8	8	0.0570%	8.63%	SFTIKPVGFK	K	D	99.2%	28.7	25.0	28.7	1.36	0	1	0	0	2	1123.65			10986.7	439	448	Empty	true
Exp1_01	Integrin beta-3 OS=Homo sapiens GN=ITGB3 PE=1 SV=2	ITB3_HUMAN	swissprot_2012.fasta	87057.7	100.0%	7	8	8	0.0570%	8.63%	THIALDGR	K	L	99.7%	38.5	25.7	38.5	2.52	0	1	0	0	2	8824793			9663.45	280	287	Empty	true
Exp1_01	Integrin beta-3 OS=Homo sapiens GN=ITGB3 PE=1 SV=2	ITB3_HUMAN	swissprot_2012.fasta	87057.7	100.0%	7	8	8	0.0570%	8.63%	VLEDRPLSDK	R	G	99.7%	40.4	28.2	28.1	3.16	0	1	0	0	2	1171.63			7312.63	89	98	Empty	true
Exp1_01	Integrin beta-3 OS=Homo sapiens GN=ITGB3 PE=1 SV=2	ITB3_HUMAN	swissprot_2012.fasta	87057.7	100.0%	7	8	8	0.0570%	8.63%	VLEDRPLSDKGSGDSSQVTQVSPQR	R	I	99.7%	64.7	29.8	64.7	5.37	0	0	1	0	2	2685.34			4646.84	89	113	Empty	true
Exp1_01	L-lactate dehydrogenase A chain OS=Homo sapiens GN=LDHA PE=1 SV=2	LDHA_HUMAN	swissprot_2012.fasta	36689.2	99.8%	2	2	2	0.0143%	5.72%	LVIITAGAR	K	Q	99.7%	54.8	25.0	37.2	1.49	0	1	0	0	2	9135830			4233.33	91	99	Empty	true
Exp1_01	L-lactate dehydrogenase A chain OS=Homo sapiens GN=LDHA PE=1 SV=2	LDHA_HUMAN	swissprot_2012.fasta	36689.2	99.8%	2	2	2	0.0143%	5.72%	VTLTSEEEAR	K	L	99.7%	50.7	29.3	34.6	1.96	0	1	0	0	2	1134.56			8614.54	306	315	Empty	true
Exp1_01	Integrin beta-1 OS=Homo sapiens GN=ITGB1 PE=1 SV=2	ITB1_HUMAN	swissprot_2012.fasta	88415.1	100.0%	3	3	3	0.0214%	3.76%	IGFGSFVEK	R	T	99.7%	58.0	26.5	45.9	1.77	0	1	0	0	2	9835197			13615	182	190	Empty	true
Exp1_01	Integrin beta-1 OS=Homo sapiens GN=ITGB1 PE=1 SV=2	ITB1_HUMAN	swissprot_2012.fasta	88415.1	100.0%	3	3	3	0.0214%	3.76%	SAVTTVVNPK	K	Y	99.7%	32.8	28.8	32.8	3.89	0	1	0	0	2	1015.58			3578.2	785	794	Empty	true
Exp1_01	Integrin beta-1 OS=Homo sapiens GN=ITGB1 PE=1 SV=2	ITB1_HUMAN	swissprot_2012.fasta	88415.1	100.0%	3	3	3	0.0214%	3.76%	SLGTDLMNEMR	K	R	99.7%	34.7	27.4	34.7	1.48	0	1	0	0	2	1266.58			10729.5	164	174	Empty	true
Exp1_01	Apolipoprotein A-II OS=Homo sapiens GN=APOA2 PE=1 SV=1	APOA2_HUMAN	swissprot_2012.fasta	11175.3	100.0%	5	8	9	0.0641%	44.0%	KAGTELVNFLSYFVELGTQPATQ	K	-	99.7%	90.7	28.7	63.8	6.24	0	1	1	0	2	2513.29			38056	78	100	Empty	true
Exp1_01	Apolipoprotein A-II OS=Homo sapiens GN=APOA2 PE=1 SV=1	APOA2_HUMAN	swissprot_2012.fasta	11175.3	100.0%	5	8	9	0.0641%	44.0%	SKEQLTPLIK	K	K	96.1%	23.8	25.0	9.86	1.47	0	1	0	0	2	1156.69			262932	68	77	Empty	true
Exp1_01	Apolipoprotein A-II OS=Homo sapiens GN=APOA2 PE=1 SV=1	APOA2_HUMAN	swissprot_2012.fasta	11175.3	100.0%	5	8	9	0.0641%	44.0%	SKEQLTPLIKK	K	A	99.7%	35.0	25.0	23.6	3.54	0	1	1	0	2	1284.79			216398	68	78	Empty	true
Exp1_01	Apolipoprotein A-II OS=Homo sapiens GN=APOA2 PE=1 SV=1	APOA2_HUMAN	swissprot_2012.fasta	11175.3	100.0%	5	8	9	0.0641%	44.0%	SPELQAEAK	K	S	99.7%	54.1	26.3	43.7	4.21	0	2	0	0	2	9724997			35434.3	54	62	Empty	true
Exp1_01	Apolipoprotein A-II OS=Homo sapiens GN=APOA2 PE=1 SV=1	APOA2_HUMAN	swissprot_2012.fasta	11175.3	100.0%	5	8	9	0.0641%	44.0%	VKSPELQAEAK	K	S	99.7%	58.0	28.9	45.5	0.000	0	1	1	0	2	1199.66			325255	52	62	Empty	true
Exp1_01	Ig kappa chain V-III region CLL OS=Homo sapiens PE=1 SV=2	KV308_HUMAN	swissprot_2012.fasta	14275.5	99.8%	2	2	2	0.0143%	19.4%	FSGSGSGTEFTLTISR	R	L	99.7%	64.9	29.6	29.0	3.47	0	1	0	0	2	1646.8			11485.5	82	97	Empty	true
Exp1_01	Ig kappa chain V-III region CLL OS=Homo sapiens PE=1 SV=2	KV308_HUMAN	swissprot_2012.fasta	14275.5	99.8%	2	2	2	0.0143%	19.4%	LLIYGASTR	R	A	99.7%	32.4	25.0	0.000	3.00	0	1	0	0	2	9935728			27813.5	66	74	Empty	true
Exp1_01	C-reactive protein OS=Homo sapiens GN=CRP PE=1 SV=1	CRP_HUMAN	swissprot_2012.fasta	25039	100.0%	7	8	9	0.0641%	27.7%	APLTKPLK	K	A	99.7%	42.9	25.0	42.9	4.96	0	1	0	0	2	8675664			26391.2	42	49	Empty	true
Exp1_01	C-reactive protein OS=Homo sapiens GN=CRP PE=1 SV=1	CRP_HUMAN	swissprot_2012.fasta	25039	100.0%	7	8	9	0.0641%	27.7%	ESDTSYVSLK	K	A	99.7%	42.3	26.2	42.3	1.89	0	1	0	0	2	1128.54			13205.8	32	41	Empty	true
Exp1_01	C-reactive protein OS=Homo sapiens GN=CRP PE=1 SV=1	CRP_HUMAN	swissprot_2012.fasta	25039	100.0%	7	8	9	0.0641%	27.7%	GYSIFSYATK	R	R	99.7%	43.6	28.3	43.6	4.96	0	2	0	0	2	1136.56			26735.7	66	75	Empty	true
Exp1_01	C-reactive protein OS=Homo sapiens GN=CRP PE=1 SV=1	CRP_HUMAN	swissprot_2012.fasta	25039	100.0%	7	8	9	0.0641%	27.7%	KAFVFPK	R	E	99.7%	43.3	25.0	43.3	1.66	0	1	0	0	2	8365029			61776	25	31	Empty	true
Exp1_01	C-reactive protein OS=Homo sapiens GN=CRP PE=1 SV=1	CRP_HUMAN	swissprot_2012.fasta	25039	100.0%	7	8	9	0.0641%	27.7%	QDNEILIFWSK	R	D	99.7%	60.6	28.7	43.9	2.12	0	1	0	0	2	1392.72			20173.9	77	87	Empty	true
Exp1_01	C-reactive protein OS=Homo sapiens GN=CRP PE=1 SV=1	CRP_HUMAN	swissprot_2012.fasta	25039	100.0%	7	8	9	0.0641%	27.7%	RQDNEILIFWSK	K	D	99.7%	49.8	29.1	31.1	1.96	0	1	1	0	2	1548.82			83908.8	76	87	Empty	true
Exp1_01	C-reactive protein OS=Homo sapiens GN=CRP PE=1 SV=1	CRP_HUMAN	swissprot_2012.fasta	25039	100.0%	7	8	9	0.0641%	27.7%	YEVQGEVFTKPQLWP	K	-	98.9%	32.8	30.1	32.8	2.41	0	1	0	0	2	1820.92			5034.95	210	224	Empty	true
Exp1_01	Alpha-2-antiplasmin OS=Homo sapiens GN=SERPINF2 PE=1 SV=3	A2AP_HUMAN	swissprot_2012.fasta	54566.6	100.0%	6	7	9	0.0641%	18.1%	DFLQSLK	K	G	99.4%	43.1	25.9	11.8	0.000	0	1	0	0	2	8504670			20404.7	455	461	Empty	true
Exp1_01	Alpha-2-antiplasmin OS=Homo sapiens GN=SERPINF2 PE=1 SV=3	A2AP_HUMAN	swissprot_2012.fasta	54566.6	100.0%	6	7	9	0.0641%	18.1%	ELKEQQDSPGNK	R	D	99.7%	39.8	28.0	39.8	1.28	0	1	0	0	2	1372.67			2103.84	443	454	Empty	true
Exp1_01	Alpha-2-antiplasmin OS=Homo sapiens GN=SERPINF2 PE=1 SV=3	A2AP_HUMAN	swissprot_2012.fasta	54566.6	100.0%	6	7	9	0.0641%	18.1%	ELKEQQDSPGNKDFLQSLK	R	G	99.7%	45.4	30.0	30.3	1.80	0	0	1	0	2	2204.12			26374.3	443	461	Empty	true
Exp1_01	Alpha-2-antiplasmin OS=Homo sapiens GN=SERPINF2 PE=1 SV=3	A2AP_HUMAN	swissprot_2012.fasta	54566.6	100.0%	6	7	9	0.0641%	18.1%	LGNQEPGGQTALK	K	S	99.7%	54.0	28.0	41.2	2.11	0	4	0	0	2	1312.69			35719.2	52	64	Empty	true
Exp1_01	Alpha-2-antiplasmin OS=Homo sapiens GN=SERPINF2 PE=1 SV=3	A2AP_HUMAN	swissprot_2012.fasta	54566.6	100.0%	6	7	9	0.0641%	18.1%	MSLSSFSVNRPFLFFIFEDTTGLPLFVGSVRNPNPSAPR	R	E	99.7%	36.6	25.9	36.6	1.74	0	0	0	1	2	4344.23			1902.12	404	442	Empty	true
Exp1_01	Alpha-2-antiplasmin OS=Homo sapiens GN=SERPINF2 PE=1 SV=3	A2AP_HUMAN	swissprot_2012.fasta	54566.6	100.0%	6	7	9	0.0641%	18.1%	QLTSGPNQEQVSPLTLLK	R	L	99.7%	104	26.2	86.2	4.85	0	1	0	0	2	1953.07			5470.15	34	51	Empty	true
Exp1_01	Actin cytoplasmic 1 OS=Homo sapiens GN=ACTB PE=1 SV=1	ACTB_HUMAN	swissprot_2012.fasta	41737.8	100.0%	11	17	20	0.143%	37.1%	AGFAGDDAPR	K	A	99.7%	75.1	26.1	54.6	3.89	0	1	0	0	2	9764484			262795	19	28	Empty	true	ACTC_HUMAN
Exp1_01	Actin cytoplasmic 1 OS=Homo sapiens GN=ACTB PE=1 SV=1	ACTB_HUMAN	swissprot_2012.fasta	41737.8	100.0%	11	17	20	0.143%	37.1%	DLTDYLMK	R	I	99.7%	44.8	26.7	26.7	1.62	0	1	0	0	2	9984865			11600.2	184	191	Empty	true	ACTC_HUMAN
Exp1_01	Actin cytoplasmic 1 OS=Homo sapiens GN=ACTB PE=1 SV=1	ACTB_HUMAN	swissprot_2012.fasta	41737.8	100.0%	11	17	20	0.143%	37.1%	DSYVGDEAQSK	K	R	99.7%	69.1	25.0	57.4	3.52	0	1	0	0	2	1198.52			7301.74	51	61	Empty	true	ACTC_HUMAN
Exp1_01	Actin cytoplasmic 1 OS=Homo sapiens GN=ACTB PE=1 SV=1	ACTB_HUMAN	swissprot_2012.fasta	41737.8	100.0%	11	17	20	0.143%	37.1%	DSYVGDEAQSKR	K	G	99.7%	49.7	27.5	35.1	3.64	0	1	1	0	2	1354.62			46705.3	51	62	Empty	true	ACTC_HUMAN
Exp1_01	Actin cytoplasmic 1 OS=Homo sapiens GN=ACTB PE=1 SV=1	ACTB_HUMAN	swissprot_2012.fasta	41737.8	100.0%	11	17	20	0.143%	37.1%	GYSFTTTAER	R	E	99.7%	46.9	27.1	46.9	2.96	0	1	0	0	2	1132.53			37119.8	197	206	Empty	true
Exp1_01	Actin cytoplasmic 1 OS=Homo sapiens GN=ACTB PE=1 SV=1	ACTB_HUMAN	swissprot_2012.fasta	41737.8	100.0%	11	17	20	0.143%	37.1%	HQGVMVGMGQK	R	D	99.7%	56.3	26.8	56.3	3.62	0	1	0	0	2	1171.57			11748.1	40	50	Empty	true	ACTC_HUMAN
Exp1_01	Actin cytoplasmic 1 OS=Homo sapiens GN=ACTB PE=1 SV=1	ACTB_HUMAN	swissprot_2012.fasta	41737.8	100.0%	11	17	20	0.143%	37.1%	IWHHTFYNELR	K	V	99.7%	49.1	28.7	37.5	1.21	0	1	3	0	2	1515.75			76811.5	85	95	Empty	true	ACTC_HUMAN
Exp1_01	Actin cytoplasmic 1 OS=Homo sapiens GN=ACTB PE=1 SV=1	ACTB_HUMAN	swissprot_2012.fasta	41737.8	100.0%	11	17	20	0.143%	37.1%	QEYDESGPSIVHR	K	K	99.7%	47.7	27.4	47.7	3.89	0	1	1	0	2	1516.7			146132	360	372	Empty	true
Exp1_01	Actin cytoplasmic 1 OS=Homo sapiens GN=ACTB PE=1 SV=1	ACTB_HUMAN	swissprot_2012.fasta	41737.8	100.0%	11	17	20	0.143%	37.1%	SYELPDGQVITIGNER	K	F	99.7%	80.6	30.2	69.5	3.82	0	1	0	0	2	1790.89			38939.2	239	254	Empty	true	ACTC_HUMAN
Exp1_01	Actin cytoplasmic 1 OS=Homo sapiens GN=ACTB PE=1 SV=1	ACTB_HUMAN	swissprot_2012.fasta	41737.8	100.0%	11	17	20	0.143%	37.1%	TTGIVMDSGDGVTHTVPIYEGYALPHAILR	R	L	99.7%	68.7	29.2	68.7	7.41	0	0	1	1	2	3183.61			223865	148	177	Empty	true
Exp1_01	Actin cytoplasmic 1 OS=Homo sapiens GN=ACTB PE=1 SV=1	ACTB_HUMAN	swissprot_2012.fasta	41737.8	100.0%	11	17	20	0.143%	37.1%	VAPEEHPVLLTEAPLNPK	R	A	99.7%	77.3	26.6	48.2	7.70	0	1	3	0	2	1954.06			278282	96	113	Empty	true
Exp1_01	Complement component C6 OS=Homo sapiens GN=C6 PE=1 SV=3	CO6_HUMAN	swissprot_2012.fasta	104786	100.0%	14	17	17	0.121%	18.2%	AKDLHLSDVFLK	K	A	99.7%	35.5	27.7	35.5	1.72	0	0	1	0	2	1385.78			31731.6	329	340	Empty	true
Exp1_01	Complement component C6 OS=Homo sapiens GN=C6 PE=1 SV=3	CO6_HUMAN	swissprot_2012.fasta	104786	100.0%	14	17	17	0.121%	18.2%	ALNHLPLEYNSALYSR	K	I	99.7%	61.9	29.6	45.8	7.96	0	1	0	0	2	1860.96			1837.19	341	356	Empty	true
Exp1_01	Complement component C6 OS=Homo sapiens GN=C6 PE=1 SV=3	CO6_HUMAN	swissprot_2012.fasta	104786	100.0%	14	17	17	0.121%	18.2%	DLHLSDVFLK	K	A	99.7%	47.3	29.1	29.4	3.19	0	1	0	0	2	1186.65			20425.9	331	340	Empty	true
Exp1_01	Complement component C6 OS=Homo sapiens GN=C6 PE=1 SV=3	CO6_HUMAN	swissprot_2012.fasta	104786	100.0%	14	17	17	0.121%	18.2%	ENPAVIDFELAPIVDLVR	K	N	99.7%	77.9	27.1	77.9	2.52	0	1	0	0	2	2010.09			6754.33	478	495	Empty	true
Exp1_01	Complement component C6 OS=Homo sapiens GN=C6 PE=1 SV=3	CO6_HUMAN	swissprot_2012.fasta	104786	100.0%	14	17	17	0.121%	18.2%	GFVVAGPSR	K	Y	98.1%	28.2	27.2	14.6	1.38	0	1	0	0	2	8894890			146908	735	743	Empty	true
Exp1_01	Complement component C6 OS=Homo sapiens GN=C6 PE=1 SV=3	CO6_HUMAN	swissprot_2012.fasta	104786	100.0%	14	17	17	0.121%	18.2%	KALQEYAAK	R	F	99.7%	63.0	26.6	44.4	1.25	0	1	0	0	2	1021.57			37156.4	509	517	Empty	true
Exp1_01	Complement component C6 OS=Homo sapiens GN=C6 PE=1 SV=3	CO6_HUMAN	swissprot_2012.fasta	104786	100.0%	14	17	17	0.121%	18.2%	KYNPIPSVQLMGNGFHFLAGEPR	R	G	99.7%	44.6	29.5	25.7	1.32	0	0	0	2	2	2572.31			67323.3	183	205	Empty	true
Exp1_01	Complement component C6 OS=Homo sapiens GN=C6 PE=1 SV=3	CO6_HUMAN	swissprot_2012.fasta	104786	100.0%	14	17	17	0.121%	18.2%	LSEKHEGSFIQGAEK	K	S	99.7%	54.8	29.7	42.5	1.85	0	1	1	0	2	1659.83			64357	425	439	Empty	true
Exp1_01	Complement component C6 OS=Homo sapiens GN=C6 PE=1 SV=3	CO6_HUMAN	swissprot_2012.fasta	104786	100.0%	14	17	17	0.121%	18.2%	NSGLTEEEAK	K	H	99.7%	54.4	27.7	32.8	0.000	0	1	0	0	2	1077.51			16301.1	388	397	Empty	true
Exp1_01	Complement component C6 OS=Homo sapiens GN=C6 PE=1 SV=3	CO6_HUMAN	swissprot_2012.fasta	104786	100.0%	14	17	17	0.121%	18.2%	RSENINHNSAFK	K	Q	99.7%	65.9	29.0	47.4	2.04	0	1	1	0	2	1416.7			52405.9	289	300	Empty	true
Exp1_01	Complement component C6 OS=Homo sapiens GN=C6 PE=1 SV=3	CO6_HUMAN	swissprot_2012.fasta	104786	100.0%	14	17	17	0.121%	18.2%	SENINHNSAFK	R	Q	99.7%	61.1	27.9	47.3	3.60	0	1	0	0	2	1260.6			6485.96	290	300	Empty	true
Exp1_01	Complement component C6 OS=Homo sapiens GN=C6 PE=1 SV=3	CO6_HUMAN	swissprot_2012.fasta	104786	100.0%	14	17	17	0.121%	18.2%	SEYGAALAWEK	R	G	99.7%	57.8	27.4	45.4	2.59	0	1	0	0	2	1224.59			11499.6	449	459	Empty	true
Exp1_01	Complement component C6 OS=Homo sapiens GN=C6 PE=1 SV=3	CO6_HUMAN	swissprot_2012.fasta	104786	100.0%	14	17	17	0.121%	18.2%	TFSEWLESVK	K	E	99.7%	54.5	27.8	41.0	2.25	0	1	0	0	2	1225.61			30236.8	468	477	Empty	true
Exp1_01	Complement component C6 OS=Homo sapiens GN=C6 PE=1 SV=3	CO6_HUMAN	swissprot_2012.fasta	104786	100.0%	14	17	17	0.121%	18.2%	VPANLENVGFEVQTAEDDLKTDFYK	R	D	99.7%	100	30.3	100	9.46	0	0	1	0	2	2842.38			15415.8	232	256	Empty	true
Exp1_01	Complement C2 OS=Homo sapiens GN=C2 PE=1 SV=2	CO2_HUMAN	swissprot_2012.fasta	83268.8	100.0%	3	3	3	0.0214%	4.79%	HAIILLTDGK	R	S	99.7%	43.3	25.0	43.3	1.48	0	1	0	0	2	1080.64			14018	369	378	Empty	true
Exp1_01	Complement C2 OS=Homo sapiens GN=C2 PE=1 SV=2	CO2_HUMAN	swissprot_2012.fasta	83268.8	100.0%	3	3	3	0.0214%	4.79%	RNDYLDIYAIGVGK	K	L	99.7%	51.7	28.2	31.0	2.00	0	0	1	0	2	1596.84			17626.1	402	415	Empty	true
Exp1_01	Complement C2 OS=Homo sapiens GN=C2 PE=1 SV=2	CO2_HUMAN	swissprot_2012.fasta	83268.8	100.0%	3	3	3	0.0214%	4.79%	SSGQWQTPGATR	K	S	99.7%	39.4	28.5	24.3	2.05	0	1	0	0	2	1275.61			6569.35	66	77	Empty	true
Exp1_01	Ras-related protein Rab-10 OS=Homo sapiens GN=RAB10 PE=1 SV=1	RAB10_HUMAN	swissprot_2012.fasta	22542.1	99.9%	2	2	2	0.0143%	11.5%	LLLIGDSGVGK	K	T	99.7%	51.3	25.0	0.000	3.15	0	1	0	0	2	1071.64			13597.9	12	22	Empty	true
Exp1_01	Ras-related protein Rab-10 OS=Homo sapiens GN=RAB10 PE=1 SV=1	RAB10_HUMAN	swissprot_2012.fasta	22542.1	99.9%	2	2	2	0.0143%	11.5%	NIDEHANEDVER	R	M	98.2%	35.3	25.3	12.0	0.000	0	0	1	0	2	1440.63			14826.7	106	117	Empty	true
Exp1_01	Lumican OS=Homo sapiens GN=LUM PE=1 SV=2	LUM_HUMAN	swissprot_2012.fasta	38431.5	99.8%	2	2	2	0.0143%	5.33%	FNALQYLR	R	L	99.7%	54.6	26.1	31.3	1.70	0	1	0	0	2	1024.56			5693.21	228	235	Empty	true
Exp1_01	Lumican OS=Homo sapiens GN=LUM PE=1 SV=2	LUM_HUMAN	swissprot_2012.fasta	38431.5	99.8%	2	2	2	0.0143%	5.33%	NNQIDHIDEK	R	A	99.7%	49.8	27.5	29.0	4.00	0	1	0	0	2	1225.58			6937.92	75	84	Empty	true
Exp1_01	Complement C1q subcomponent subunit B OS=Homo sapiens GN=C1QB PE=1 SV=3	C1QB_HUMAN	swissprot_2012.fasta	26722.8	100.0%	5	13	32	0.228%	28.5%	DQTIRFDHVITNMNNNYEPR	R	S	99.7%	52.6	29.6	38.9	5.70	0	0	2	1	2	2477.16			203816	137	156	Empty	true
Exp1_01	Complement C1q subcomponent subunit B OS=Homo sapiens GN=C1QB PE=1 SV=3	C1QB_HUMAN	swissprot_2012.fasta	26722.8	100.0%	5	13	32	0.228%	28.5%	FDHVITNMNNNYEPR	R	S	99.7%	99.4	27.7	5.00	6.74	0	4	8	0	2	1864.83			1676550	142	156	Empty	true
Exp1_01	Complement C1q subcomponent subunit B OS=Homo sapiens GN=C1QB PE=1 SV=3	C1QB_HUMAN	swissprot_2012.fasta	26722.8	100.0%	5	13	32	0.228%	28.5%	LEQGENVFLQATDK	K	N	99.7%	104	30.0	83.7	6.66	0	7	2	0	2	1591.8			377757	216	229	Empty	true
Exp1_01	Complement C1q subcomponent subunit B OS=Homo sapiens GN=C1QB PE=1 SV=3	C1QB_HUMAN	swissprot_2012.fasta	26722.8	100.0%	5	13	32	0.228%	28.5%	NSLLGMEGANSIFSGFLLFPDMEA	K	-	99.2%	33.6	29.7	23.1	1.92	0	2	0	0	2	2560.21			1906.73	230	253	Empty	true
Exp1_01	Complement C1q subcomponent subunit B OS=Homo sapiens GN=C1QB PE=1 SV=3	C1QB_HUMAN	swissprot_2012.fasta	26722.8	100.0%	5	13	32	0.228%	28.5%	VPGLYYFTYHASSR	K	G	99.7%	59.6	29.8	59.6	5.15	0	2	4	0	2	1660.81			768926	164	177	Empty	true
Exp1_01	Immunoglobulin lambda-like polypeptide 5 OS=Homo sapiens GN=IGLL5 PE=2 SV=2	IGLL5_HUMAN	swissprot_2012.fasta	23062.9	100.0%	5	5	10	0.0713%	29.0%	ANPTVTLFPPSSEELQANK	K	A	99.7%	52.9	29.7	38.7	1.33	0	2	0	0	2	2043.04			54486.1	113	131	Empty	true
Exp1_01	Immunoglobulin lambda-like polypeptide 5 OS=Homo sapiens GN=IGLL5 PE=2 SV=2	IGLL5_HUMAN	swissprot_2012.fasta	23062.9	100.0%	5	5	10	0.0713%	29.0%	QSNNKYAASSYLSLTPEQWK	K	S	99.6%	46.0	30.2	0.000	0.000	0	0	1	0	2	2316.11			6418.27	169	188	Empty	true	LAC2_HUMAN
Exp1_01	Immunoglobulin lambda-like polypeptide 5 OS=Homo sapiens GN=IGLL5 PE=2 SV=2	IGLL5_HUMAN	swissprot_2012.fasta	23062.9	100.0%	5	5	10	0.0713%	29.0%	SYSCQVTHEGSTVEK	R	T	99.7%	88.2	26.1	75.6	0.000	0	1	0	0	2	1754.75			5187.75	192	206	Empty	true	LAC2_HUMAN
Exp1_01	Immunoglobulin lambda-like polypeptide 5 OS=Homo sapiens GN=IGLL5 PE=2 SV=2	IGLL5_HUMAN	swissprot_2012.fasta	23062.9	100.0%	5	5	10	0.0713%	29.0%	VTVLGQPK	K	A	99.7%	46.1	25.0	27.4	1.77	0	4	0	0	2	8415143			145024	105	112	Empty	true
Exp1_01	Immunoglobulin lambda-like polypeptide 5 OS=Homo sapiens GN=IGLL5 PE=2 SV=2	IGLL5_HUMAN	swissprot_2012.fasta	23062.9	100.0%	5	5	10	0.0713%	29.0%	YAASSYLSLTPEQWK	K	S	99.7%	81.5	29.5	66.8	3.59	0	2	0	0	2	1743.86			7339.8	174	188	Empty	true	LAC2_HUMAN
Exp1_01	Apolipoprotein C-I OS=Homo sapiens GN=APOC1 PE=1 SV=1	APOC1_HUMAN	swissprot_2012.fasta	9332.4	100.0%	3	4	4	0.0285%	37.3%	IKQSELSAK	R	M	99.7%	33.3	25.9	10.6	1.38	0	1	0	0	2	1003.58			10428.3	55	63	Empty	true
Exp1_01	Apolipoprotein C-I OS=Homo sapiens GN=APOC1 PE=1 SV=1	APOC1_HUMAN	swissprot_2012.fasta	9332.4	100.0%	3	4	4	0.0285%	37.3%	LKEFGNTLEDK	K	A	99.7%	36.0	28.9	16.4	1.21	0	0	1	0	2	1293.67			517127	37	47	Empty	true
Exp1_01	Apolipoprotein C-I OS=Homo sapiens GN=APOC1 PE=1 SV=1	APOC1_HUMAN	swissprot_2012.fasta	9332.4	100.0%	3	4	4	0.0285%	37.3%	MREWFSETFQK	K	V	99.7%	47.2	27.8	26.9	5.21	0	1	1	0	2	1488.69			150007	64	74	Empty	true
Exp1_01	Coagulation factor V OS=Homo sapiens GN=F5 PE=1 SV=4	FA5_HUMAN	swissprot_2012.fasta	251710	100.0%	8	8	8	0.0570%	4.45%	AEVDDVIQVR	R	F	99.7%	69.6	29.7	52.0	2.96	0	1	0	0	2	1143.6			10023.2	1650	1659	Empty	true
Exp1_01	Coagulation factor V OS=Homo sapiens GN=F5 PE=1 SV=4	FA5_HUMAN	swissprot_2012.fasta	251710	100.0%	8	8	8	0.0570%	4.45%	ETDIEDSDDIPEDTTYKK	R	V	99.7%	35.9	26.9	25.8	1.54	0	0	1	0	2	2113.93			13747.8	1600	1617	Empty	true
Exp1_01	Coagulation factor V OS=Homo sapiens GN=F5 PE=1 SV=4	FA5_HUMAN	swissprot_2012.fasta	251710	100.0%	8	8	8	0.0570%	4.45%	EVIITGIQTQGAK	K	H	99.7%	56.2	27.3	39.0	2.72	0	1	0	0	2	1357.77			9744.34	1970	1982	Empty	true
Exp1_01	Coagulation factor V OS=Homo sapiens GN=F5 PE=1 SV=4	FA5_HUMAN	swissprot_2012.fasta	251710	100.0%	8	8	8	0.0570%	4.45%	LAAEFASKPWIQVDMQK	K	E	99.7%	52.7	29.4	52.7	4.89	0	0	1	0	2	1962.02			12320.7	1953	1969	Empty	true
Exp1_01	Coagulation factor V OS=Homo sapiens GN=F5 PE=1 SV=4	FA5_HUMAN	swissprot_2012.fasta	251710	100.0%	8	8	8	0.0570%	4.45%	MPMGLSTGIISDSQIK	R	A	99.7%	107	29.8	96.7	5.96	0	1	0	0	2	1677.86			4768.98	1909	1924	Empty	true
Exp1_01	Coagulation factor V OS=Homo sapiens GN=F5 PE=1 SV=4	FA5_HUMAN	swissprot_2012.fasta	251710	100.0%	8	8	8	0.0570%	4.45%	MYEQEWVR	K	L	99.7%	45.5	25.1	45.5	4.32	0	1	0	0	2	1140.51			8045.96	1820	1827	Empty	true
Exp1_01	Coagulation factor V OS=Homo sapiens GN=F5 PE=1 SV=4	FA5_HUMAN	swissprot_2012.fasta	251710	100.0%	8	8	8	0.0570%	4.45%	SEAYNTFSER	R	R	99.7%	55.8	25.0	45.4	2.80	0	1	0	0	2	1203.53			12039.2	1053	1062	Empty	true
Exp1_01	Coagulation factor V OS=Homo sapiens GN=F5 PE=1 SV=4	FA5_HUMAN	swissprot_2012.fasta	251710	100.0%	8	8	8	0.0570%	4.45%	VNAWQAK	R	A	97.7%	40.6	28.7	26.5	0.000	0	1	0	0	2	8164362			2319.41	2109	2115	Empty	true
Exp1_01	Serum amyloid P-component OS=Homo sapiens GN=APCS PE=1 SV=2	SAMP_HUMAN	swissprot_2012.fasta	25387.7	100.0%	4	4	4	0.0285%	20.2%	AYSLFSYNTQGR	R	D	98.8%	31.7	29.2	31.7	2.02	0	1	0	0	2	1406.67			12606.1	65	76	Empty	true
Exp1_01	Serum amyloid P-component OS=Homo sapiens GN=APCS PE=1 SV=2	SAMP_HUMAN	swissprot_2012.fasta	25387.7	100.0%	4	4	4	0.0285%	20.2%	IVLGQEQDSYGGK	K	F	99.7%	38.0	29.9	38.0	3.25	0	1	0	0	2	1393.7			4021.64	150	162	Empty	true
Exp1_01	Serum amyloid P-component OS=Homo sapiens GN=APCS PE=1 SV=2	SAMP_HUMAN	swissprot_2012.fasta	25387.7	100.0%	4	4	4	0.0285%	20.2%	QGYFVEAQPK	R	I	98.8%	30.6	28.0	30.6	1.33	0	1	0	0	2	1166.58			6810.29	140	149	Empty	true
Exp1_01	Serum amyloid P-component OS=Homo sapiens GN=APCS PE=1 SV=2	SAMP_HUMAN	swissprot_2012.fasta	25387.7	100.0%	4	4	4	0.0285%	20.2%	VGEYSLYIGR	R	H	99.7%	63.6	27.6	63.6	3.08	0	1	0	0	2	1156.6			1666.99	87	96	Empty	true
Exp1_01	Tubulin beta-1 chain OS=Homo sapiens GN=TUBB1 PE=1 SV=1	TBB1_HUMAN	swissprot_2012.fasta	50327	100.0%	3	3	3	0.0214%	14.6%	AVLEEDEEVTEEAEMEPEDKGH	K	-	99.3%	26.7	25.0	26.7	1.77	0	0	1	0	2	2515.07			6744.3	430	451	Empty	true
Exp1_01	Tubulin beta-1 chain OS=Homo sapiens GN=TUBB1 PE=1 SV=1	TBB1_HUMAN	swissprot_2012.fasta	50327	100.0%	3	3	3	0.0214%	14.6%	ISVYYNEAYGR	R	K	99.7%	41.6	29.3	27.5	1.24	0	1	0	0	2	1334.64			19978	47	57	Empty	true
Exp1_01	Tubulin beta-1 chain OS=Homo sapiens GN=TUBB1 PE=1 SV=1	TBB1_HUMAN	swissprot_2012.fasta	50327	100.0%	3	3	3	0.0214%	14.6%	LAVNMVPFPR	K	L	99.7%	69.8	28.6	56.0	2.51	0	1	0	0	2	1143.63			13201.2	253	262	Empty	false	TBB4B_HUMANTBB5_HUMAN
Exp1_01	Tubulin beta-1 chain OS=Homo sapiens GN=TUBB1 PE=1 SV=1	TBB1_HUMAN	swissprot_2012.fasta	50327	100.0%	3	3	3	0.0214%	14.6%	LGALFQPDSFVHGNSGAGNNWAK	K	G	99.7%	60.0	30.1	49.4	3.59	0	0	1	0	2	2387.15			6908.85	81	103	Empty	true
Exp1_01	Platelet glycoprotein 4 OS=Homo sapiens GN=CD36 PE=1 SV=2	CD36_HUMAN	swissprot_2012.fasta	53054.3	99.9%	2	2	2	0.0143%	5.30%	QVVLEEGTIAFK	K	N	99.7%	48.1	26.8	48.1	1.57	0	1	0	0	2	1333.74			4151.16	41	52	Empty	true
Exp1_01	Platelet glycoprotein 4 OS=Homo sapiens GN=CD36 PE=1 SV=2	CD36_HUMAN	swissprot_2012.fasta	53054.3	99.9%	2	2	2	0.0143%	5.30%	RLQVNLLVKPSEK	K	I	99.4%	27.0	25.0	27.0	1.35	0	0	1	0	2	1523.93			2329.14	386	398	Empty	true
Exp1_01	Apolipoprotein F OS=Homo sapiens GN=APOF PE=1 SV=2	APOF_HUMAN	swissprot_2012.fasta	35400.3	99.9%	2	2	3	0.0214%	15.6%	GRDGAIDLGYDLLMTMAGMSGGPMGLAISAALKPALR	R	S	96.3%	22.0	27.9	6.20	1.51	0	0	0	1	2	3690.88			1742.63	214	250	Empty	true
Exp1_01	Apolipoprotein F OS=Homo sapiens GN=APOF PE=1 SV=2	APOF_HUMAN	swissprot_2012.fasta	35400.3	99.9%	2	2	3	0.0214%	15.6%	SGVQQLIQYYQDQK	R	D	99.7%	64.9	29.1	46.8	3.89	0	0	2	0	2	1697.85			100167	251	264	Empty	true
Exp1_01	Ig lambda-2 chain C regions OS=Homo sapiens GN=IGLC2 PE=1 SV=1	LAC2_HUMAN	swissprot_2012.fasta	11293.2	99.8%	2	3	16	0.114%	60.4%	AAPSVTLFPPSSEELQANK	K	A	99.7%	89.0	29.5	75.8	4.54	0	10	4	0	2	1986.02			370227	5	23	Empty	true
Exp1_01	Ig lambda-2 chain C regions OS=Homo sapiens GN=IGLC2 PE=1 SV=1	LAC2_HUMAN	swissprot_2012.fasta	11293.2	99.8%	2	3	16	0.114%	60.4%	AGVETTTPSK	K	Q	99.7%	56.6	29.6	44.7	1.25	0	2	0	0	2	9905103			9689.87	51	60	Empty	true
Exp1_01	Ig lambda-2 chain C regions OS=Homo sapiens GN=IGLC2 PE=1 SV=1	LAC2_HUMAN	swissprot_2012.fasta	11293.2	99.8%	2	3	16	0.114%	60.4%	QSNNKYAASSYLSLTPEQWK	K	S	99.6%	46.0	30.2	0.000	0.000	0	0	1	0	2	2316.11			6418.27	61	80	Empty	false	IGLL5_HUMAN
Exp1_01	Ig lambda-2 chain C regions OS=Homo sapiens GN=IGLC2 PE=1 SV=1	LAC2_HUMAN	swissprot_2012.fasta	11293.2	99.8%	2	3	16	0.114%	60.4%	SYSCQVTHEGSTVEK	R	T	99.7%	88.2	26.1	75.6	0.000	0	1	0	0	2	1754.75			5187.75	84	98	Empty	false	IGLL5_HUMAN
Exp1_01	Ig lambda-2 chain C regions OS=Homo sapiens GN=IGLC2 PE=1 SV=1	LAC2_HUMAN	swissprot_2012.fasta	11293.2	99.8%	2	3	16	0.114%	60.4%	YAASSYLSLTPEQWK	K	S	99.7%	81.5	29.5	66.8	3.59	0	2	0	0	2	1743.86			7339.8	66	80	Empty	false	IGLL5_HUMAN
Exp1_01	Apolipoprotein D OS=Homo sapiens GN=APOD PE=1 SV=1	APOD_HUMAN	swissprot_2012.fasta	21276.1	100.0%	3	3	6	0.0428%	17.5%	IPTTFENGR	K	C	99.7%	38.8	28.4	22.8	1.23	0	2	0	0	2	1035.51			57647.8	52	60	Empty	true
Exp1_01	Apolipoprotein D OS=Homo sapiens GN=APOD PE=1 SV=1	APOD_HUMAN	swissprot_2012.fasta	21276.1	100.0%	3	3	6	0.0428%	17.5%	NILTSNNIDVK	K	K	99.7%	61.1	29.6	46.5	1.24	0	1	0	0	2	1230.67			22461.3	165	175	Empty	true
Exp1_01	Apolipoprotein D OS=Homo sapiens GN=APOD PE=1 SV=1	APOD_HUMAN	swissprot_2012.fasta	21276.1	100.0%	3	3	6	0.0428%	17.5%	NPNLPPETVDSLK	R	N	99.6%	25.1	28.0	13.7	3.42	0	3	0	0	2	1423.74			19743.5	152	164	Empty	true
Exp1_01	Ceruloplasmin OS=Homo sapiens GN=CP PE=1 SV=1	CERU_HUMAN	swissprot_2012.fasta	122208	100.0%	11	11	11	0.0784%	13.7%	ALYLQYTDETFR	K	T	99.7%	74.2	29.7	74.2	5.16	0	1	0	0	2	1519.74			3721.11	70	81	Empty	true
Exp1_01	Ceruloplasmin OS=Homo sapiens GN=CP PE=1 SV=1	CERU_HUMAN	swissprot_2012.fasta	122208	100.0%	11	11	11	0.0784%	13.7%	EYTDASFTNR	R	K	99.7%	54.5	25.0	54.5	0.000	0	1	0	0	2	1203.53			6750.26	427	436	Empty	true
Exp1_01	Ceruloplasmin OS=Homo sapiens GN=CP PE=1 SV=1	CERU_HUMAN	swissprot_2012.fasta	122208	100.0%	11	11	11	0.0784%	13.7%	GAYPLSIEPIGVR	K	F	99.5%	45.7	27.7	24.6	0.000	0	1	0	0	2	1371.76			24623.2	469	481	Empty	true
Exp1_01	Ceruloplasmin OS=Homo sapiens GN=CP PE=1 SV=1	CERU_HUMAN	swissprot_2012.fasta	122208	100.0%	11	11	11	0.0784%	13.7%	KAEEEHLGILGPQLHADVGDK	R	V	99.7%	44.2	29.3	33.2	0.000	0	0	0	1	2	2256.16			19641.1	799	819	Empty	true
Exp1_01	Ceruloplasmin OS=Homo sapiens GN=CP PE=1 SV=1	CERU_HUMAN	swissprot_2012.fasta	122208	100.0%	11	11	11	0.0784%	13.7%	KAEEEHLGILGPQLHADVGDKVK	R	I	99.7%	49.6	27.2	33.6	2.15	0	0	0	1	2	2483.33			20359.7	799	821	Empty	true
Exp1_01	Ceruloplasmin OS=Homo sapiens GN=CP PE=1 SV=1	CERU_HUMAN	swissprot_2012.fasta	122208	100.0%	11	11	11	0.0784%	13.7%	LISVDTEHSNIYLQNGPDR	K	I	99.1%	30.7	30.0	3.37	2.72	0	0	1	0	2	2172.06			13036.3	44	62	Empty	true
Exp1_01	Ceruloplasmin OS=Homo sapiens GN=CP PE=1 SV=1	CERU_HUMAN	swissprot_2012.fasta	122208	100.0%	11	11	11	0.0784%	13.7%	MFTTAPDQVDKEDEDFQESNK	R	M	99.7%	49.1	25.4	49.1	4.30	0	0	1	0	2	2474.07			16695.1	599	619	Empty	true
Exp1_01	Ceruloplasmin OS=Homo sapiens GN=CP PE=1 SV=1	CERU_HUMAN	swissprot_2012.fasta	122208	100.0%	11	11	11	0.0784%	13.7%	MHAINGR	K	M	99.7%	33.4	25.0	21.4	6.04	0	1	0	0	2	7993880			7541.14	958	964	Empty	true
Exp1_01	Ceruloplasmin OS=Homo sapiens GN=CP PE=1 SV=1	CERU_HUMAN	swissprot_2012.fasta	122208	100.0%	11	11	11	0.0784%	13.7%	NNEGTYYSPNYNPQSR	K	S	99.7%	52.7	25.8	52.7	3.85	0	1	0	0	2	1903.82			3780.11	485	500	Empty	true
Exp1_01	Ceruloplasmin OS=Homo sapiens GN=CP PE=1 SV=1	CERU_HUMAN	swissprot_2012.fasta	122208	100.0%	11	11	11	0.0784%	13.7%	QSEDSTFYLGER	R	T	99.7%	86.0	25.1	86.0	3.15	0	1	0	0	2	1431.64			10492.2	721	732	Empty	true
Exp1_01	Ceruloplasmin OS=Homo sapiens GN=CP PE=1 SV=1	CERU_HUMAN	swissprot_2012.fasta	122208	100.0%	11	11	11	0.0784%	13.7%	VNKDDEEFIESNK	K	M	99.7%	81.0	28.4	81.0	5.72	0	1	0	0	2	1566.73			4249.95	945	957	Empty	true
Exp1_01	Integrin alpha-IIb OS=Homo sapiens GN=ITGA2B PE=1 SV=3	ITA2B_HUMAN	swissprot_2012.fasta	113377	100.0%	14	16	16	0.114%	15.8%	AEAQVELR	R	G	99.7%	56.4	28.3	23.5	0.000	0	1	0	0	2	9154894			5106.45	775	782	Empty	true
Exp1_01	Integrin alpha-IIb OS=Homo sapiens GN=ITGA2B PE=1 SV=3	ITA2B_HUMAN	swissprot_2012.fasta	113377	100.0%	14	16	16	0.114%	15.8%	ALSNVEGFER	R	L	99.7%	64.4	29.1	64.4	3.54	0	1	0	0	2	1121.56			44313.1	693	702	Empty	true
Exp1_01	Integrin alpha-IIb OS=Homo sapiens GN=ITGA2B PE=1 SV=3	ITA2B_HUMAN	swissprot_2012.fasta	113377	100.0%	14	16	16	0.114%	15.8%	ASVQLLVQDSLNPAVK	K	S	99.7%	73.2	25.0	61.3	4.01	0	1	1	0	2	1681.95			10303.2	487	502	Empty	true
Exp1_01	Integrin alpha-IIb OS=Homo sapiens GN=ITGA2B PE=1 SV=3	ITA2B_HUMAN	swissprot_2012.fasta	113377	100.0%	14	16	16	0.114%	15.8%	DGYNDIAVAAPYGGPSGR	R	G	99.7%	68.5	29.1	49.6	4.54	0	1	0	0	2	1779.83			3598.39	400	417	Empty	true
Exp1_01	Integrin alpha-IIb OS=Homo sapiens GN=ITGA2B PE=1 SV=3	ITA2B_HUMAN	swissprot_2012.fasta	113377	100.0%	14	16	16	0.114%	15.8%	FGSAIAPLGDLDR	R	D	97.2%	26.7	29.5	7.00	1.92	0	1	0	0	2	1331.7			4264.91	387	399	Empty	true
Exp1_01	Integrin alpha-IIb OS=Homo sapiens GN=ITGA2B PE=1 SV=3	ITA2B_HUMAN	swissprot_2012.fasta	113377	100.0%	14	16	16	0.114%	15.8%	FGSAIAPLGDLDRDGYNDIAVAAPYGGPSGR	R	G	99.7%	36.5	29.9	18.7	1.64	0	0	1	0	2	3092.51			9657.41	387	417	Empty	true
Exp1_01	Integrin alpha-IIb OS=Homo sapiens GN=ITGA2B PE=1 SV=3	ITA2B_HUMAN	swissprot_2012.fasta	113377	100.0%	14	16	16	0.114%	15.8%	GPHALGAPSLLLTGTQLYGR	R	F	99.7%	31.0	25.1	31.0	3.42	0	0	1	0	2	2022.11			28473.6	367	386	Empty	true
Exp1_01	Integrin alpha-IIb OS=Homo sapiens GN=ITGA2B PE=1 SV=3	ITA2B_HUMAN	swissprot_2012.fasta	113377	100.0%	14	16	16	0.114%	15.8%	GQVLVFLGQSEGLR	R	S	99.7%	86.1	27.1	73.9	3.96	0	1	0	0	2	1502.83			6984.36	418	431	Empty	true
Exp1_01	Integrin alpha-IIb OS=Homo sapiens GN=ITGA2B PE=1 SV=3	ITA2B_HUMAN	swissprot_2012.fasta	113377	100.0%	14	16	16	0.114%	15.8%	HDLLVGAPLYMESR	R	A	99.7%	41.3	29.5	26.8	2.42	0	0	1	0	2	1600.82			5074.96	335	348	Empty	true
Exp1_01	Integrin alpha-IIb OS=Homo sapiens GN=ITGA2B PE=1 SV=3	ITA2B_HUMAN	swissprot_2012.fasta	113377	100.0%	14	16	16	0.114%	15.8%	IVLLDVPVR	K	A	99.7%	64.2	25.0	46.5	0.000	0	1	0	0	2	1023.66			10167.2	766	774	Empty	true
Exp1_01	Integrin alpha-IIb OS=Homo sapiens GN=ITGA2B PE=1 SV=3	ITA2B_HUMAN	swissprot_2012.fasta	113377	100.0%	14	16	16	0.114%	15.8%	IYVENDFSWDKR	R	Y	99.7%	57.7	28.9	45.0	2.00	0	1	1	0	2	1571.75			34269.5	185	196	Empty	true
Exp1_01	Integrin alpha-IIb OS=Homo sapiens GN=ITGA2B PE=1 SV=3	ITA2B_HUMAN	swissprot_2012.fasta	113377	100.0%	14	16	16	0.114%	15.8%	NRPPLEEDDEEGE	R	-	99.7%	59.7	25.0	59.7	3.39	0	1	0	0	2	1528.64			4801.57	1027	1039	Empty	true
Exp1_01	Integrin alpha-IIb OS=Homo sapiens GN=ITGA2B PE=1 SV=3	ITA2B_HUMAN	swissprot_2012.fasta	113377	100.0%	14	16	16	0.114%	15.8%	VAIVVGAPR	R	T	99.7%	56.9	25.0	56.9	2.59	0	1	0	0	2	8815567			115193	64	72	Empty	true
Exp1_01	Integrin alpha-IIb OS=Homo sapiens GN=ITGA2B PE=1 SV=3	ITA2B_HUMAN	swissprot_2012.fasta	113377	100.0%	14	16	16	0.114%	15.8%	VYLFLQPR	R	G	99.7%	43.2	25.0	24.9	1.54	0	1	0	0	2	1035.6			36663.5	359	366	Empty	true
Exp1_01	Ras-related protein Rap-1b OS=Homo sapiens GN=RAP1B PE=1 SV=1	RAP1B_HUMAN	swissprot_2012.fasta	20824.9	99.9%	2	2	2	0.0143%	14.1%	LVVLGSGGVGK	K	S	99.7%	66.2	25.0	42.6	3.72	0	1	0	0	2	9856042			53677.4	6	16	Empty	true
Exp1_01	Ras-related protein Rap-1b OS=Homo sapiens GN=RAP1B PE=1 SV=1	RAP1B_HUMAN	swissprot_2012.fasta	20824.9	99.9%	2	2	2	0.0143%	14.1%	VKDTDDVPMILVGNK	R	C	99.7%	76.4	29.5	76.4	3.80	0	1	0	0	2	1643.87			8327.57	103	117	Empty	true
Exp1_01	Ficolin-3 OS=Homo sapiens GN=FCN3 PE=1 SV=2	FCN3_HUMAN	swissprot_2012.fasta	32903.3	100.0%	2	2	2	0.0143%	6.35%	YAVSEAAAHK	R	Y	99.5%	35.2	29.4	35.2	2.52	0	1	0	0	2	1046.53			9080.07	267	276	Empty	true
Exp1_01	Ficolin-3 OS=Homo sapiens GN=FCN3 PE=1 SV=2	FCN3_HUMAN	swissprot_2012.fasta	32903.3	100.0%	2	2	2	0.0143%	6.35%	YGIDWASGR	K	G	99.7%	58.2	26.7	44.4	2.80	0	1	0	0	2	1024.48			6693.1	277	285	Empty	true
Exp1_01	Gelsolin OS=Homo sapiens GN=GSN PE=1 SV=1	GELS_HUMAN	swissprot_2012.fasta	85697.8	100.0%	11	13	13	0.0926%	19.9%	AGALNSNDAFVLK	K	T	99.7%	46.9	29.3	46.9	2.68	0	1	0	0	2	1319.7			5045.1	585	597	Empty	true
Exp1_01	Gelsolin OS=Homo sapiens GN=GSN PE=1 SV=1	GELS_HUMAN	swissprot_2012.fasta	85697.8	100.0%	11	13	13	0.0926%	19.9%	AGKEPGLQIWR	K	V	99.7%	34.9	26.4	21.3	4.55	0	1	1	0	2	1254.7			20678.5	62	72	Empty	true
Exp1_01	Gelsolin OS=Homo sapiens GN=GSN PE=1 SV=1	GELS_HUMAN	swissprot_2012.fasta	85697.8	100.0%	11	13	13	0.0926%	19.9%	DSQEEEKTEALTSAK	K	R	99.7%	69.7	29.1	69.7	2.80	0	1	0	0	2	1665.78			5819.73	714	728	Empty	true
Exp1_01	Gelsolin OS=Homo sapiens GN=GSN PE=1 SV=1	GELS_HUMAN	swissprot_2012.fasta	85697.8	100.0%	11	13	13	0.0926%	19.9%	DSQEEEKTEALTSAKR	K	Y	99.7%	42.9	29.9	31.3	2.04	0	0	1	0	2	1821.88			5338.56	714	729	Empty	true
Exp1_01	Gelsolin OS=Homo sapiens GN=GSN PE=1 SV=1	GELS_HUMAN	swissprot_2012.fasta	85697.8	100.0%	11	13	13	0.0926%	19.9%	HVVPNEVVVQR	K	L	99.7%	44.5	26.8	44.5	5.17	0	1	0	0	2	1275.72			7701.99	178	188	Empty	true
Exp1_01	Gelsolin OS=Homo sapiens GN=GSN PE=1 SV=1	GELS_HUMAN	swissprot_2012.fasta	85697.8	100.0%	11	13	13	0.0926%	19.9%	KGGVASGFK	K	H	99.7%	48.0	25.0	25.7	0.000	0	1	0	0	2	8504782			8233.97	169	177	Empty	true
Exp1_01	Gelsolin OS=Homo sapiens GN=GSN PE=1 SV=1	GELS_HUMAN	swissprot_2012.fasta	85697.8	100.0%	11	13	13	0.0926%	19.9%	NWRDPDQTDGLGLSYLSSHIANVER	K	V	99.7%	50.0	30.2	35.6	3.82	0	0	0	1	2	2843.37			103529	395	419	Empty	true
Exp1_01	Gelsolin OS=Homo sapiens GN=GSN PE=1 SV=1	GELS_HUMAN	swissprot_2012.fasta	85697.8	100.0%	11	13	13	0.0926%	19.9%	QTQVSVLPEGGETPLFK	K	Q	99.7%	48.5	29.0	48.5	4.96	0	1	0	0	2	1829.96			5333.59	374	390	Empty	true
Exp1_01	Gelsolin OS=Homo sapiens GN=GSN PE=1 SV=1	GELS_HUMAN	swissprot_2012.fasta	85697.8	100.0%	11	13	13	0.0926%	19.9%	TGAQELLR	K	V	99.7%	55.9	28.5	34.1	1.28	0	1	0	0	2	8874946			44672.6	616	623	Empty	true
Exp1_01	Gelsolin OS=Homo sapiens GN=GSN PE=1 SV=1	GELS_HUMAN	swissprot_2012.fasta	85697.8	100.0%	11	13	13	0.0926%	19.9%	TPSAAYLWVGTGASEAEK	K	T	99.7%	88.5	29.6	88.5	4.92	0	1	0	0	2	1837.9			19794.9	598	615	Empty	true
Exp1_01	Gelsolin OS=Homo sapiens GN=GSN PE=1 SV=1	GELS_HUMAN	swissprot_2012.fasta	85697.8	100.0%	11	13	13	0.0926%	19.9%	VPFDAATLHTSTAMAAQHGMDDDGTGQK	R	Q	99.7%	79.6	28.1	79.6	5.74	0	0	1	1	2	2873.28			40290.6	420	447	Empty	true
Exp1_01	Filaggrin-2 OS=Homo sapiens GN=FLG2 PE=1 SV=1	FILA2_HUMAN	swissprot_2012.fasta	248052	100.0%	3	3	3	0.0214%	2.05%	FSNSSSSNEFSK	R	C	99.7%	79.0	25.0	79.0	1.82	0	1	0	0	2	1320.57			8605.91	404	415	Empty	true
Exp1_01	Filaggrin-2 OS=Homo sapiens GN=FLG2 PE=1 SV=1	FILA2_HUMAN	swissprot_2012.fasta	248052	100.0%	3	3	3	0.0214%	2.05%	HQEEESETEEDEEDTPGHK	R	S	99.7%	58.9	25.0	58.9	1.70	0	0	1	0	2	2254.89			2759.03	108	126	Empty	true
Exp1_01	Filaggrin-2 OS=Homo sapiens GN=FLG2 PE=1 SV=1	FILA2_HUMAN	swissprot_2012.fasta	248052	100.0%	3	3	3	0.0214%	2.05%	HSSWSEGEEHGYSSGHSR	R	G	99.7%	41.0	25.0	41.0	0.000	0	0	0	1	2	2015.82			17628.2	131	148	Empty	true
Exp1_01	Thymosin beta-4 OS=Homo sapiens GN=TMSB4X PE=1 SV=2	TYB4_HUMAN	swissprot_2012.fasta	5052.9	100.0%	3	3	3	0.0214%	59.1%	ETIEQEKQAGES	K	-	99.7%	57.5	27.6	57.5	3.60	0	1	0	0	2	1348.62			9056.82	33	44	Empty	true
Exp1_01	Thymosin beta-4 OS=Homo sapiens GN=TMSB4X PE=1 SV=2	TYB4_HUMAN	swissprot_2012.fasta	5052.9	100.0%	3	3	3	0.0214%	59.1%	SDKPDMAEIEK	M	F	99.7%	37.8	27.4	23.5	2.70	0	1	0	0	1	1304.6			10216.6	2	12	Empty	true
Exp1_01	Thymosin beta-4 OS=Homo sapiens GN=TMSB4X PE=1 SV=2	TYB4_HUMAN	swissprot_2012.fasta	5052.9	100.0%	3	3	3	0.0214%	59.1%	SDKPDMAEIEKFDK	M	S	99.7%	36.8	29.2	36.8	1.60	0	0	1	0	1	1694.79			1003.95	2	15	Empty	true
Exp1_01	Tubulin beta chain OS=Homo sapiens GN=TUBB PE=1 SV=2	TBB5_HUMAN	swissprot_2012.fasta	49670.6	100.0%	4	4	4	0.0285%	11.0%	AILVDLEPGTMDSVR	R	S	99.3%	27.4	30.0	11.5	2.92	0	1	0	0	2	1615.84			5476.39	63	77	Empty	true
Exp1_01	Tubulin beta chain OS=Homo sapiens GN=TUBB PE=1 SV=2	TBB5_HUMAN	swissprot_2012.fasta	49670.6	100.0%	4	4	4	0.0285%	11.0%	EVDEQMLNVQNK	K	N	99.7%	60.5	29.0	40.6	0.000	0	1	0	0	2	1446.69			8490.83	325	336	Empty	true	TBB4B_HUMAN
Exp1_01	Tubulin beta chain OS=Homo sapiens GN=TUBB PE=1 SV=2	TBB5_HUMAN	swissprot_2012.fasta	49670.6	100.0%	4	4	4	0.0285%	11.0%	ISVYYNEATGGK	R	Y	99.7%	75.2	28.1	75.2	3.52	0	1	0	0	2	1301.64			6432.19	47	58	Empty	true
Exp1_01	Tubulin beta chain OS=Homo sapiens GN=TUBB PE=1 SV=2	TBB5_HUMAN	swissprot_2012.fasta	49670.6	100.0%	4	4	4	0.0285%	11.0%	LAVNMVPFPR	K	L	99.7%	69.8	28.6	56.0	2.51	0	1	0	0	2	1143.63			13201.2	253	262	Empty	true	TBB4B_HUMANTBB1_HUMAN
Exp1_01	Complement factor H-related protein 1 OS=Homo sapiens GN=CFHR1 PE=1 SV=2	FHR1_HUMAN	swissprot_2012.fasta	37650.4	99.8%	2	2	4	0.0285%	13.3%	EIMENYNIALR	R	W	99.7%	67.1	28.9	46.3	2.44	0	3	0	0	2	1365.68			79447.2	271	281	Empty	false	CFAH_HUMAN
Exp1_01	Complement factor H-related protein 1 OS=Homo sapiens GN=CFHR1 PE=1 SV=2	FHR1_HUMAN	swissprot_2012.fasta	37650.4	99.8%	2	2	4	0.0285%	13.3%	INHGILYDEEK	K	Y	99.7%	36.8	29.4	18.2	2.12	0	1	0	0	2	1330.66			30252.5	28	38	Empty	true
Exp1_01	Complement factor H-related protein 1 OS=Homo sapiens GN=CFHR1 PE=1 SV=2	FHR1_HUMAN	swissprot_2012.fasta	37650.4	99.8%	2	2	4	0.0285%	13.3%	LQNNENNISCVER	R	G	99.7%	42.2	26.5	42.2	2.55	0	3	0	0	2	1590.72			16505.6	120	132	Empty	true
Exp1_01	Complement factor H-related protein 1 OS=Homo sapiens GN=CFHR1 PE=1 SV=2	FHR1_HUMAN	swissprot_2012.fasta	37650.4	99.8%	2	2	4	0.0285%	13.3%	NGQWSEPPK	R	C	99.7%	54.4	25.5	42.5	3.12	0	12	0	0	2	1042.5			361747	253	261	Empty	false	CFAH_HUMAN
Exp1_01	Haptoglobin-related protein OS=Homo sapiens GN=HPR PE=1 SV=2	HPTR_HUMAN	swissprot_2012.fasta	39029.5	100.0%	4	7	7	0.0499%	29.9%	ILGGHLDAK	R	G	99.7%	41.1	25.0	23.6	3.62	0	1	0	0	2	9235311			43881.8	104	112	Empty	false	HPT_HUMAN
Exp1_01	Haptoglobin-related protein OS=Homo sapiens GN=HPR PE=1 SV=2	HPTR_HUMAN	swissprot_2012.fasta	39029.5	100.0%	4	7	7	0.0499%	29.9%	ILGGHLDAKGSFPWQAK	R	M	99.7%	49.1	27.7	49.1	0.000	0	0	1	0	2	1824.98			6134.54	104	120	Empty	false	HPT_HUMAN
Exp1_01	Haptoglobin-related protein OS=Homo sapiens GN=HPR PE=1 SV=2	HPTR_HUMAN	swissprot_2012.fasta	39029.5	100.0%	4	7	7	0.0499%	29.9%	LRTEGDGVYTLNDK	R	K	99.7%	64.9	29.4	52.8	2.74	0	1	0	0	2	1580.79			3562.11	59	72	Empty	false	HPT_HUMAN
Exp1_01	Haptoglobin-related protein OS=Homo sapiens GN=HPR PE=1 SV=2	HPTR_HUMAN	swissprot_2012.fasta	39029.5	100.0%	4	7	7	0.0499%	29.9%	LRTEGDGVYTLNDKK	R	Q	99.7%	52.6	29.0	32.0	1.15	0	0	1	1	2	1709.87			39646.4	59	73	Empty	false	HPT_HUMAN
Exp1_01	Haptoglobin-related protein OS=Homo sapiens GN=HPR PE=1 SV=2	HPTR_HUMAN	swissprot_2012.fasta	39029.5	100.0%	4	7	7	0.0499%	29.9%	MSDLGAVISLLLWGR	-	Q	99.7%	75.3	27.4	54.6	4.26	0	1	1	0	2	1630.9			11118.4	1	15	Empty	true
Exp1_01	Haptoglobin-related protein OS=Homo sapiens GN=HPR PE=1 SV=2	HPTR_HUMAN	swissprot_2012.fasta	39029.5	100.0%	4	7	7	0.0499%	29.9%	NPANPVQR	K	I	99.7%	40.7	25.1	40.7	1.60	0	1	0	0	2	8954744			33657.4	96	103	Empty	false	HPT_HUMAN
Exp1_01	Haptoglobin-related protein OS=Homo sapiens GN=HPR PE=1 SV=2	HPTR_HUMAN	swissprot_2012.fasta	39029.5	100.0%	4	7	7	0.0499%	29.9%	QLVEIEK	K	V	99.2%	44.8	28.6	15.8	0.000	0	1	0	0	2	8584932			39983.1	171	177	Empty	false	HPT_HUMAN
Exp1_01	Haptoglobin-related protein OS=Homo sapiens GN=HPR PE=1 SV=2	HPTR_HUMAN	swissprot_2012.fasta	39029.5	100.0%	4	7	7	0.0499%	29.9%	SCAVAEYGVYVK	K	V	99.7%	27.7	27.7	27.7	5.39	0	1	0	0	2	1346.63			4993.97	322	333	Empty	false	HPT_HUMAN
Exp1_01	Haptoglobin-related protein OS=Homo sapiens GN=HPR PE=1 SV=2	HPTR_HUMAN	swissprot_2012.fasta	39029.5	100.0%	4	7	7	0.0499%	29.9%	SDLGAVISLLLWGR	M	Q	99.7%	70.1	25.0	44.2	3.62	0	2	0	0	1	1499.86			17580	2	15	Empty	true
Exp1_01	Haptoglobin-related protein OS=Homo sapiens GN=HPR PE=1 SV=2	HPTR_HUMAN	swissprot_2012.fasta	39029.5	100.0%	4	7	7	0.0499%	29.9%	TEGDGVYTLNDK	R	K	99.7%	54.8	26.8	54.8	2.30	0	1	0	0	2	1311.61			7094.87	61	72	Empty	false	HPT_HUMAN
Exp1_01	Haptoglobin-related protein OS=Homo sapiens GN=HPR PE=1 SV=2	HPTR_HUMAN	swissprot_2012.fasta	39029.5	100.0%	4	7	7	0.0499%	29.9%	TEGDGVYTLNDKK	R	Q	99.7%	45.0	28.7	45.0	3.36	0	1	1	0	2	1439.7			16921.3	61	73	Empty	false	HPT_HUMAN
Exp1_01	Haptoglobin-related protein OS=Homo sapiens GN=HPR PE=1 SV=2	HPTR_HUMAN	swissprot_2012.fasta	39029.5	100.0%	4	7	7	0.0499%	29.9%	VGYVSGWGQSDNFK	R	L	99.7%	79.7	27.3	79.7	6.57	0	1	0	0	2	1543.72			5527.92	220	233	Empty	true
Exp1_01	Haptoglobin-related protein OS=Homo sapiens GN=HPR PE=1 SV=2	HPTR_HUMAN	swissprot_2012.fasta	39029.5	100.0%	4	7	7	0.0499%	29.9%	VVLHPNYHQVDIGLIK	K	L	99.7%	38.6	25.0	38.6	3.00	0	0	1	1	2	1845.04			49958	178	193	Empty	true
Exp1_01	Transferrin receptor protein 1 OS=Homo sapiens GN=TFRC PE=1 SV=2	TFR1_HUMAN	swissprot_2012.fasta	84873.6	100.0%	3	3	3	0.0214%	5.39%	HPVTGQFLYQDSNWASK	K	V	99.4%	31.7	29.7	31.7	2.96	0	0	1	0	2	1977.95			13873.4	515	531	Empty	true
Exp1_01	Transferrin receptor protein 1 OS=Homo sapiens GN=TFRC PE=1 SV=2	TFR1_HUMAN	swissprot_2012.fasta	84873.6	100.0%	3	3	3	0.0214%	5.39%	LAVDEEENADNNTK	K	A	99.7%	101	25.8	101	6.29	0	1	0	0	2	1561.7			3394.47	40	53	Empty	true
Exp1_01	Transferrin receptor protein 1 OS=Homo sapiens GN=TFRC PE=1 SV=2	TFR1_HUMAN	swissprot_2012.fasta	84873.6	100.0%	3	3	3	0.0214%	5.39%	LLNENSYVPR	K	E	99.7%	53.5	29.3	53.5	2.00	0	1	0	0	2	1204.63			3843.29	146	155	Empty	true
Exp1_01	Keratin type I cytoskeletal 10 OS=Homo sapiens GN=KRT10 PE=1 SV=6	K1C10_HUMAN	swissprot_2012.fasta	58828.8	100.0%	25	33	36	0.257%	43.8%	ADLEMQIESLTEELAYLKK	K	N	99.7%	41.6	29.6	26.4	2.85	0	0	2	0	2	2224.14			225700	267	285	Empty	true
Exp1_01	Keratin type I cytoskeletal 10 OS=Homo sapiens GN=KRT10 PE=1 SV=6	K1C10_HUMAN	swissprot_2012.fasta	58828.8	100.0%	25	33	36	0.257%	43.8%	ALEESNYELEGK	R	I	99.7%	81.9	28.1	81.9	3.41	0	2	0	0	2	1381.65			91026.8	166	177	Empty	true
Exp1_01	Keratin type I cytoskeletal 10 OS=Homo sapiens GN=KRT10 PE=1 SV=6	K1C10_HUMAN	swissprot_2012.fasta	58828.8	100.0%	25	33	36	0.257%	43.8%	DAEAWFNEK	K	S	99.6%	44.9	25.4	32.9	0.000	0	1	0	0	2	1109.49			182295	335	343	Empty	true
Exp1_01	Keratin type I cytoskeletal 10 OS=Homo sapiens GN=KRT10 PE=1 SV=6	K1C10_HUMAN	swissprot_2012.fasta	58828.8	100.0%	25	33	36	0.257%	43.8%	ELTTEIDNNIEQISSYK	K	S	99.7%	89.9	29.9	54.2	7.85	0	1	0	0	2	1996.97			24112.4	346	362	Empty	true
Exp1_01	Keratin type I cytoskeletal 10 OS=Homo sapiens GN=KRT10 PE=1 SV=6	K1C10_HUMAN	swissprot_2012.fasta	58828.8	100.0%	25	33	36	0.257%	43.8%	GSLGGGFSSGGFSGGSFSR	K	G	99.7%	104	27.9	90.8	6.15	0	1	0	0	2	1707.77			35443.4	41	59	Empty	true
Exp1_01	Keratin type I cytoskeletal 10 OS=Homo sapiens GN=KRT10 PE=1 SV=6	K1C10_HUMAN	swissprot_2012.fasta	58828.8	100.0%	25	33	36	0.257%	43.8%	HYSSSRSGGGGGGGGCGGGGGVSSLR	K	I	99.7%	72.9	25.7	59.0	5.35	0	0	1	0	2	2267.98			6612.94	10	35	Empty	true
Exp1_01	Keratin type I cytoskeletal 10 OS=Homo sapiens GN=KRT10 PE=1 SV=6	K1C10_HUMAN	swissprot_2012.fasta	58828.8	100.0%	25	33	36	0.257%	43.8%	IRLENEIQTYR	K	S	99.7%	40.9	28.5	9.86	2.18	0	0	1	0	2	1434.77			53673.2	440	450	Empty	true
Exp1_01	Keratin type I cytoskeletal 10 OS=Homo sapiens GN=KRT10 PE=1 SV=6	K1C10_HUMAN	swissprot_2012.fasta	58828.8	100.0%	25	33	36	0.257%	43.8%	KDAEAWFNEK	R	S	99.7%	60.2	28.4	49.7	2.59	0	1	1	0	2	1237.58			75836.5	334	343	Empty	true
Exp1_01	Keratin type I cytoskeletal 10 OS=Homo sapiens GN=KRT10 PE=1 SV=6	K1C10_HUMAN	swissprot_2012.fasta	58828.8	100.0%	25	33	36	0.257%	43.8%	LASYLDK	R	V	99.7%	46.7	25.0	36.0	0.000	0	1	0	0	2	8094404			60751.9	157	163	Empty	false	K1C17_HUMANK1C14_HUMANK1C16_HUMANK1C9_HUMAN
Exp1_01	Keratin type I cytoskeletal 10 OS=Homo sapiens GN=KRT10 PE=1 SV=6	K1C10_HUMAN	swissprot_2012.fasta	58828.8	100.0%	25	33	36	0.257%	43.8%	LASYLDKVR	R	A	99.7%	49.2	25.3	34.8	2.54	0	1	0	0	2	1064.61			49147.2	157	165	Empty	true	K1C17_HUMANK1C14_HUMANK1C16_HUMAN
Exp1_01	Keratin type I cytoskeletal 10 OS=Homo sapiens GN=KRT10 PE=1 SV=6	K1C10_HUMAN	swissprot_2012.fasta	58828.8	100.0%	25	33	36	0.257%	43.8%	LENEIQTYR	R	S	99.3%	46.8	29.5	23.0	0.000	0	1	0	0	2	1165.58			28449	442	450	Empty	true
Exp1_01	Keratin type I cytoskeletal 10 OS=Homo sapiens GN=KRT10 PE=1 SV=6	K1C10_HUMAN	swissprot_2012.fasta	58828.8	100.0%	25	33	36	0.257%	43.8%	LKYENEVALR	R	Q	99.7%	36.1	28.2	9.37	1.92	0	1	2	0	2	1235.66			77642.5	236	245	Empty	true
Exp1_01	Keratin type I cytoskeletal 10 OS=Homo sapiens GN=KRT10 PE=1 SV=6	K1C10_HUMAN	swissprot_2012.fasta	58828.8	100.0%	25	33	36	0.257%	43.8%	NHEEEMKDLR	K	N	98.9%	28.1	25.5	28.1	2.51	0	1	0	0	2	1316.59			8359.03	286	295	Empty	true
Exp1_01	Keratin type I cytoskeletal 10 OS=Homo sapiens GN=KRT10 PE=1 SV=6	K1C10_HUMAN	swissprot_2012.fasta	58828.8	100.0%	25	33	36	0.257%	43.8%	NQILNLTTDNANILLQIDNAR	K	L	99.7%	101	27.8	89.8	6.42	0	1	0	0	2	2367.26			7303.81	208	228	Empty	true
Exp1_01	Keratin type I cytoskeletal 10 OS=Homo sapiens GN=KRT10 PE=1 SV=6	K1C10_HUMAN	swissprot_2012.fasta	58828.8	100.0%	25	33	36	0.257%	43.8%	NVQALEIELQSQLALK	R	Q	99.7%	77.9	25.5	60.1	1.96	0	0	1	0	2	1797.01			6542.05	371	386	Empty	true
Exp1_01	Keratin type I cytoskeletal 10 OS=Homo sapiens GN=KRT10 PE=1 SV=6	K1C10_HUMAN	swissprot_2012.fasta	58828.8	100.0%	25	33	36	0.257%	43.8%	QSLEASLAETEGR	K	Y	99.7%	107	29.7	93.2	3.28	0	1	0	0	2	1390.68			29426.3	387	399	Empty	true
Exp1_01	Keratin type I cytoskeletal 10 OS=Homo sapiens GN=KRT10 PE=1 SV=6	K1C10_HUMAN	swissprot_2012.fasta	58828.8	100.0%	25	33	36	0.257%	43.8%	QSVEADINGLR	R	R	99.7%	55.7	30.0	55.7	2.00	0	2	0	0	2	1201.62			25562	246	256	Empty	true	K1C13_HUMAN
Exp1_01	Keratin type I cytoskeletal 10 OS=Homo sapiens GN=KRT10 PE=1 SV=6	K1C10_HUMAN	swissprot_2012.fasta	58828.8	100.0%	25	33	36	0.257%	43.8%	QSVEADINGLRR	R	V	99.4%	33.5	29.9	1.37	1.18	0	0	1	0	2	1358.7			61020.7	246	257	Empty	true	K1C13_HUMAN
Exp1_01	Keratin type I cytoskeletal 10 OS=Homo sapiens GN=KRT10 PE=1 SV=6	K1C10_HUMAN	swissprot_2012.fasta	58828.8	100.0%	25	33	36	0.257%	43.8%	SKELTTEIDNNIEQISSYK	K	S	99.7%	139	30.3	139	7.72	0	1	3	0	2	2212.1			134699	344	362	Empty	true
Exp1_01	Keratin type I cytoskeletal 10 OS=Homo sapiens GN=KRT10 PE=1 SV=6	K1C10_HUMAN	swissprot_2012.fasta	58828.8	100.0%	25	33	36	0.257%	43.8%	SLLEGEGSSGGGGR	R	G	99.7%	80.1	28.0	66.5	5.74	0	1	0	0	2	1262.6			38547.4	451	464	Empty	true
Exp1_01	Keratin type I cytoskeletal 10 OS=Homo sapiens GN=KRT10 PE=1 SV=6	K1C10_HUMAN	swissprot_2012.fasta	58828.8	100.0%	25	33	36	0.257%	43.8%	SQYEQLAEQNR	R	K	99.7%	78.3	28.0	61.5	4.62	0	1	0	0	2	1365.64			10095.5	323	333	Empty	true
Exp1_01	Keratin type I cytoskeletal 10 OS=Homo sapiens GN=KRT10 PE=1 SV=6	K1C10_HUMAN	swissprot_2012.fasta	58828.8	100.0%	25	33	36	0.257%	43.8%	SQYEQLAEQNRK	R	D	99.7%	50.4	29.6	38.6	2.82	0	1	0	0	2	1493.73			17851.8	323	334	Empty	true
Exp1_01	Keratin type I cytoskeletal 10 OS=Homo sapiens GN=KRT10 PE=1 SV=6	K1C10_HUMAN	swissprot_2012.fasta	58828.8	100.0%	25	33	36	0.257%	43.8%	TIDDLKNQILNLTTDNANILLQIDNAR	K	L	99.7%	58.4	25.5	46.9	2.27	0	0	1	1	2	3052.63			59347.8	202	228	Empty	true
Exp1_01	Keratin type I cytoskeletal 10 OS=Homo sapiens GN=KRT10 PE=1 SV=6	K1C10_HUMAN	swissprot_2012.fasta	58828.8	100.0%	25	33	36	0.257%	43.8%	VLDELTLTK	R	A	99.7%	62.8	25.5	62.8	1.42	0	1	0	0	2	1031.6			208159	258	266	Empty	true
Exp1_01	Keratin type I cytoskeletal 10 OS=Homo sapiens GN=KRT10 PE=1 SV=6	K1C10_HUMAN	swissprot_2012.fasta	58828.8	100.0%	25	33	36	0.257%	43.8%	VTMQNLNDR	K	L	99.7%	79.0	29.4	56.9	2.17	0	2	0	0	2	1090.53			128479	148	156	Empty	true	K1C14_HUMANK1C16_HUMAN
Exp1_01	Keratin type I cytoskeletal 10 OS=Homo sapiens GN=KRT10 PE=1 SV=6	K1C10_HUMAN	swissprot_2012.fasta	58828.8	100.0%	25	33	36	0.257%	43.8%	YENEVALR	K	Q	99.7%	48.5	28.1	48.5	2.49	0	1	0	0	2	9934999			2154.29	238	245	Empty	true
Exp1_01	Lipopolysaccharide-binding protein OS=Homo sapiens GN=LBP PE=1 SV=3	LBP_HUMAN	swissprot_2012.fasta	53386	100.0%	4	4	5	0.0356%	9.98%	ITGFLKPGK	K	V	99.3%	29.4	25.0	29.4	1.96	0	1	0	0	2	9605879			2155	398	406	Empty	true
Exp1_01	Lipopolysaccharide-binding protein OS=Homo sapiens GN=LBP PE=1 SV=3	LBP_HUMAN	swissprot_2012.fasta	53386	100.0%	4	4	5	0.0356%	9.98%	RVQLYDLGLQIHK	K	D	99.7%	47.4	25.5	47.4	0.000	0	0	1	0	2	1582.91			9839.12	455	467	Empty	true
Exp1_01	Lipopolysaccharide-binding protein OS=Homo sapiens GN=LBP PE=1 SV=3	LBP_HUMAN	swissprot_2012.fasta	53386	100.0%	4	4	5	0.0356%	9.98%	SFRPFVPR	K	L	96.6%	26.1	26.9	14.5	1.80	0	1	0	0	2	1005.56			18343.4	320	327	Empty	true
Exp1_01	Lipopolysaccharide-binding protein OS=Homo sapiens GN=LBP PE=1 SV=3	LBP_HUMAN	swissprot_2012.fasta	53386	100.0%	4	4	5	0.0356%	9.98%	SPVTLLAAVMSLPEEHNK	R	M	99.7%	71.4	28.1	71.4	5.04	0	0	2	0	2	1936.02			61366.4	258	275	Empty	true
Exp1_01	Pigment epithelium-derived factor OS=Homo sapiens GN=SERPINF1 PE=1 SV=4	PEDF_HUMAN	swissprot_2012.fasta	46314.3	99.8%	2	2	2	0.0143%	5.26%	LQSLFDSPDFSK	K	I	99.7%	43.0	28.7	43.0	3.09	0	1	0	0	2	1383.68			6374.22	334	345	Empty	true
Exp1_01	Pigment epithelium-derived factor OS=Homo sapiens GN=SERPINF1 PE=1 SV=4	PEDF_HUMAN	swissprot_2012.fasta	46314.3	99.8%	2	2	2	0.0143%	5.26%	TVQAVLTVPK	K	L	99.7%	57.1	25.0	42.5	1.41	0	1	0	0	2	1055.65			9511.32	307	316	Empty	true
Exp1_01	Lysozyme C OS=Homo sapiens GN=LYZ PE=1 SV=1	LYSC_HUMAN	swissprot_2012.fasta	16536.9	99.8%	2	2	2	0.0143%	13.5%	STDYGIFQINSR	R	Y	99.7%	57.9	27.8	57.9	4.55	0	1	0	0	2	1400.68			15108.3	69	80	Empty	true
Exp1_01	Lysozyme C OS=Homo sapiens GN=LYZ PE=1 SV=1	LYSC_HUMAN	swissprot_2012.fasta	16536.9	99.8%	2	2	2	0.0143%	13.5%	WESGYNTR	K	A	97.0%	24.6	25.0	24.6	1.70	0	1	0	0	2	1012.45			4102.73	52	59	Empty	true
Exp1_01	Heparin cofactor 2 OS=Homo sapiens GN=SERPIND1 PE=1 SV=3	HEP2_HUMAN	swissprot_2012.fasta	57072.9	100.0%	4	5	5	0.0356%	6.81%	FAFNLYR	K	V	99.5%	35.2	29.8	24.0	1.66	0	1	0	0	2	9304831			16989.3	133	139	Empty	true
Exp1_01	Heparin cofactor 2 OS=Homo sapiens GN=SERPIND1 PE=1 SV=3	HEP2_HUMAN	swissprot_2012.fasta	57072.9	100.0%	4	5	5	0.0356%	6.81%	NGNMAGISDQR	K	I	99.7%	53.8	26.4	38.0	2.00	0	2	0	0	2	1162.53			9423.65	421	431	Empty	true
Exp1_01	Heparin cofactor 2 OS=Homo sapiens GN=SERPIND1 PE=1 SV=3	HEP2_HUMAN	swissprot_2012.fasta	57072.9	100.0%	4	5	5	0.0356%	6.81%	NYNLVESLK	K	L	99.6%	47.0	27.8	19.9	0.000	0	1	0	0	2	1079.57			11133.9	402	410	Empty	true
Exp1_01	Heparin cofactor 2 OS=Homo sapiens GN=SERPIND1 PE=1 SV=3	HEP2_HUMAN	swissprot_2012.fasta	57072.9	100.0%	4	5	5	0.0356%	6.81%	VSMMQTK	K	G	99.7%	32.2	25.0	20.5	1.25	0	1	0	0	2	8244005			5978.88	323	329	Empty	true
Exp1_01	Plasminogen OS=Homo sapiens GN=PLG PE=1 SV=2	PLMN_HUMAN	swissprot_2012.fasta	90567.4	100.0%	4	4	4	0.0285%	6.05%	DVVLFEK	R	K	96.7%	24.3	25.0	9.64	1.40	0	1	0	0	2	8494717			13774.7	90	96	Empty	true
Exp1_01	Plasminogen OS=Homo sapiens GN=PLG PE=1 SV=2	PLMN_HUMAN	swissprot_2012.fasta	90567.4	100.0%	4	4	4	0.0285%	6.05%	EAQLPVIENK	K	V	96.5%	35.2	25.0	35.2	0.000	0	1	0	0	2	1140.63			22999.3	718	727	Empty	true
Exp1_01	Plasminogen OS=Homo sapiens GN=PLG PE=1 SV=2	PLMN_HUMAN	swissprot_2012.fasta	90567.4	100.0%	4	4	4	0.0285%	6.05%	LSSPAVITDK	K	V	99.7%	38.7	28.1	28.6	1.59	0	1	0	0	2	1030.58			11645	671	680	Empty	true
Exp1_01	Plasminogen OS=Homo sapiens GN=PLG PE=1 SV=2	PLMN_HUMAN	swissprot_2012.fasta	90567.4	100.0%	4	4	4	0.0285%	6.05%	VILGAHQEVNLEPHVQEIEVSR	K	L	99.7%	66.4	27.6	66.4	3.80	0	0	1	0	2	2496.32			21304.9	635	656	Empty	true
Exp1_01	Kallistatin OS=Homo sapiens GN=SERPINA4 PE=1 SV=3	KAIN_HUMAN	swissprot_2012.fasta	48544	99.8%	2	2	2	0.0143%	5.62%	FYYLIASETPGK	R	N	96.6%	28.9	29.7	28.9	1.44	0	1	0	0	2	1388.71			6434.87	62	73	Empty	true
Exp1_01	Kallistatin OS=Homo sapiens GN=SERPINA4 PE=1 SV=3	KAIN_HUMAN	swissprot_2012.fasta	48544	99.8%	2	2	2	0.0143%	5.62%	VGSALFLSHNLK	R	F	97.1%	35.2	27.2	22.2	0.000	0	0	1	0	2	1285.73			26432.8	139	150	Empty	true
Exp1_01	Complement component C9 OS=Homo sapiens GN=C9 PE=1 SV=2	CO9_HUMAN	swissprot_2012.fasta	63174.9	100.0%	13	17	20	0.143%	18.8%	AIEDYINEFSVR	R	K	99.7%	77.3	28.4	58.9	3.30	0	1	0	0	2	1455.71			205715	497	508	Empty	true
Exp1_01	Complement component C9 OS=Homo sapiens GN=C9 PE=1 SV=2	CO9_HUMAN	swissprot_2012.fasta	63174.9	100.0%	13	17	20	0.143%	18.8%	ALPTTYEK	K	G	94.9%	23.2	26.1	3.45	1.57	0	1	0	0	2	9224881			113076	325	332	Empty	true
Exp1_01	Complement component C9 OS=Homo sapiens GN=C9 PE=1 SV=2	CO9_HUMAN	swissprot_2012.fasta	63174.9	100.0%	13	17	20	0.143%	18.8%	DGNTLTYYR	R	R	99.7%	48.1	25.6	35.6	0.000	0	2	0	0	2	1102.52			21439.5	186	194	Empty	true
Exp1_01	Complement component C9 OS=Homo sapiens GN=C9 PE=1 SV=2	CO9_HUMAN	swissprot_2012.fasta	63174.9	100.0%	13	17	20	0.143%	18.8%	DRDGNTLTYYR	R	R	98.6%	29.6	27.5	14.5	1.52	0	1	0	0	2	1373.64			14857.6	184	194	Empty	true
Exp1_01	Complement component C9 OS=Homo sapiens GN=C9 PE=1 SV=2	CO9_HUMAN	swissprot_2012.fasta	63174.9	100.0%	13	17	20	0.143%	18.8%	DRVVEESELAR	R	T	99.7%	41.4	29.9	29.4	2.38	0	1	0	0	2	1302.66			16473.8	144	154	Empty	true
Exp1_01	Complement component C9 OS=Homo sapiens GN=C9 PE=1 SV=2	CO9_HUMAN	swissprot_2012.fasta	63174.9	100.0%	13	17	20	0.143%	18.8%	DVVLTTTFVDDIK	R	A	99.7%	49.3	28.0	49.3	2.70	0	1	0	0	2	1465.78			21095.8	312	324	Empty	true
Exp1_01	Complement component C9 OS=Homo sapiens GN=C9 PE=1 SV=2	CO9_HUMAN	swissprot_2012.fasta	63174.9	100.0%	13	17	20	0.143%	18.8%	LSPIYNLVPVK	K	M	99.7%	47.8	25.0	47.8	2.02	0	1	0	0	2	1242.75			56706.8	473	483	Empty	true
Exp1_01	Complement component C9 OS=Homo sapiens GN=C9 PE=1 SV=2	CO9_HUMAN	swissprot_2012.fasta	63174.9	100.0%	13	17	20	0.143%	18.8%	NRDVVLTTTFVDDIK	R	A	99.7%	89.4	28.0	68.8	7.12	0	1	1	0	2	1735.92			47490.1	310	324	Empty	true
Exp1_01	Complement component C9 OS=Homo sapiens GN=C9 PE=1 SV=2	CO9_HUMAN	swissprot_2012.fasta	63174.9	100.0%	13	17	20	0.143%	18.8%	RPWNVASLIYETK	R	G	99.7%	55.9	28.3	41.8	4.51	0	1	1	0	2	1576.85			20430	195	207	Empty	true
Exp1_01	Complement component C9 OS=Homo sapiens GN=C9 PE=1 SV=2	CO9_HUMAN	swissprot_2012.fasta	63174.9	100.0%	13	17	20	0.143%	18.8%	SIEVFGQFNGK	R	R	99.7%	80.9	28.0	69.9	2.41	0	4	0	0	2	1225.62			103013	66	76	Empty	true
Exp1_01	Complement component C9 OS=Homo sapiens GN=C9 PE=1 SV=2	CO9_HUMAN	swissprot_2012.fasta	63174.9	100.0%	13	17	20	0.143%	18.8%	SIEVFGQFNGKR	R	C	99.7%	66.0	28.3	55.2	3.70	0	2	0	0	2	1381.72			21867.1	66	77	Empty	true
Exp1_01	Complement component C9 OS=Homo sapiens GN=C9 PE=1 SV=2	CO9_HUMAN	swissprot_2012.fasta	63174.9	100.0%	13	17	20	0.143%	18.8%	TEHYEEQIEAFK	R	S	99.7%	53.3	28.0	34.6	3.39	0	1	0	0	2	1523.7			12141.3	214	225	Empty	true
Exp1_01	Complement component C9 OS=Homo sapiens GN=C9 PE=1 SV=2	CO9_HUMAN	swissprot_2012.fasta	63174.9	100.0%	13	17	20	0.143%	18.8%	VVEESELAR	R	T	99.7%	49.0	29.2	30.8	1.38	0	1	0	0	2	1031.54			19667	146	154	Empty	true
Exp1_01	C4b-binding protein beta chain OS=Homo sapiens GN=C4BPB PE=1 SV=1	C4BPB_HUMAN	swissprot_2012.fasta	28357.2	100.0%	2	2	2	0.0143%	6.35%	ALLAFQESK	K	N	99.7%	38.6	27.1	26.2	3.09	0	1	0	0	2	1006.56			5015.24	205	213	Empty	true
Exp1_01	C4b-binding protein beta chain OS=Homo sapiens GN=C4BPB PE=1 SV=1	C4BPB_HUMAN	swissprot_2012.fasta	28357.2	100.0%	2	2	2	0.0143%	6.35%	YSLELKK	K	A	99.6%	31.0	25.0	12.9	3.16	0	1	0	0	2	8805139			6172.82	238	244	Empty	true
Exp1_01	Ig lambda chain V-III region LOI OS=Homo sapiens PE=1 SV=1	LV302_HUMAN	swissprot_2012.fasta	11934.9	99.8%	2	2	2	0.0143%	21.6%	FSGSNSGNTATLTISR	R	V	99.7%	99.3	29.4	99.3	3.48	0	1	0	0	2	1612.79			7923.95	60	75	Empty	true
Exp1_01	Ig lambda chain V-III region LOI OS=Homo sapiens PE=1 SV=1	LV302_HUMAN	swissprot_2012.fasta	11934.9	99.8%	2	2	2	0.0143%	21.6%	LTVLSQPK	K	-	99.7%	38.7	25.0	28.6	1.48	0	1	0	0	2	8855405			37698.4	104	111	Empty	true
Exp1_01	Complement component C7 OS=Homo sapiens GN=C7 PE=1 SV=2	CO7_HUMAN	swissprot_2012.fasta	93516.6	100.0%	13	13	13	0.0926%	19.3%	AASGTQNNVLR	K	G	99.7%	88.3	30.1	62.1	2.03	0	1	0	0	2	1130.59			8638.06	362	372	Empty	true
Exp1_01	Complement component C7 OS=Homo sapiens GN=C7 PE=1 SV=2	CO7_HUMAN	swissprot_2012.fasta	93516.6	100.0%	13	13	13	0.0926%	19.3%	DGFVQDEGTMFPVGK	K	N	99.7%	85.7	27.8	70.2	7.39	0	1	0	0	2	1626.75			8869.52	579	593	Empty	true
Exp1_01	Complement component C7 OS=Homo sapiens GN=C7 PE=1 SV=2	CO7_HUMAN	swissprot_2012.fasta	93516.6	100.0%	13	13	13	0.0926%	19.3%	ELSHLPSLYDYSAYR	K	R	99.7%	37.5	29.6	37.5	1.82	0	0	1	0	2	1813.88			9350.62	279	293	Empty	true
Exp1_01	Complement component C7 OS=Homo sapiens GN=C7 PE=1 SV=2	CO7_HUMAN	swissprot_2012.fasta	93516.6	100.0%	13	13	13	0.0926%	19.3%	GGGAGFISGLSYLELDNPAGNKR	R	R	99.7%	49.5	29.7	37.8	1.92	0	0	1	0	2	2293.16			18464	379	401	Empty	true
Exp1_01	Complement component C7 OS=Homo sapiens GN=C7 PE=1 SV=2	CO7_HUMAN	swissprot_2012.fasta	93516.6	100.0%	13	13	13	0.0926%	19.3%	KVFSGDGKDFYR	R	L	99.7%	62.7	29.6	43.6	3.39	0	1	0	0	2	1418.71			3360.87	167	178	Empty	true
Exp1_01	Complement component C7 OS=Homo sapiens GN=C7 PE=1 SV=2	CO7_HUMAN	swissprot_2012.fasta	93516.6	100.0%	13	13	13	0.0926%	19.3%	LKQNDFNSVEEK	K	K	99.5%	32.3	29.4	19.8	1.96	0	0	1	0	2	1450.72			26766.1	324	335	Empty	true
Exp1_01	Complement component C7 OS=Homo sapiens GN=C7 PE=1 SV=2	CO7_HUMAN	swissprot_2012.fasta	93516.6	100.0%	13	13	13	0.0926%	19.3%	LSGNVLSYTFQVK	R	I	99.7%	76.3	28.4	61.5	4.32	0	1	0	0	2	1455.78			11591.6	179	191	Empty	true
Exp1_01	Complement component C7 OS=Homo sapiens GN=C7 PE=1 SV=2	CO7_HUMAN	swissprot_2012.fasta	93516.6	100.0%	13	13	13	0.0926%	19.3%	QNDFNSVEEK	K	K	99.7%	52.6	25.1	34.8	0.000	0	1	0	0	2	1209.54			4480.93	326	335	Empty	true
Exp1_01	Complement component C7 OS=Homo sapiens GN=C7 PE=1 SV=2	CO7_HUMAN	swissprot_2012.fasta	93516.6	100.0%	13	13	13	0.0926%	19.3%	RPSCDIDKPPPNIELTGNGYNELTGQFR	R	N	99.7%	32.9	30.2	32.9	3.09	0	0	0	1	2	3189.53			9705.66	125	152	Empty	true
Exp1_01	Complement component C7 OS=Homo sapiens GN=C7 PE=1 SV=2	CO7_HUMAN	swissprot_2012.fasta	93516.6	100.0%	13	13	13	0.0926%	19.3%	SSGWHFVVK	K	F	99.7%	39.8	29.7	27.8	2.43	0	1	0	0	2	1046.54			7777.66	339	347	Empty	true
Exp1_01	Complement component C7 OS=Homo sapiens GN=C7 PE=1 SV=2	CO7_HUMAN	swissprot_2012.fasta	93516.6	100.0%	13	13	13	0.0926%	19.3%	VFSGDGKDFYR	K	L	99.7%	37.1	28.0	37.1	1.27	0	0	1	0	2	1290.61			56498.7	168	178	Empty	true
Exp1_01	Complement component C7 OS=Homo sapiens GN=C7 PE=1 SV=2	CO7_HUMAN	swissprot_2012.fasta	93516.6	100.0%	13	13	13	0.0926%	19.3%	VLFYVDSEK	R	L	99.6%	32.8	26.9	21.9	1.89	0	1	0	0	2	1099.57			11627.5	315	323	Empty	true
Exp1_01	Complement component C7 OS=Homo sapiens GN=C7 PE=1 SV=2	CO7_HUMAN	swissprot_2012.fasta	93516.6	100.0%	13	13	13	0.0926%	19.3%	YSAWAESVTNLPQVIK	R	Q	99.7%	61.7	29.1	49.3	3.08	0	1	0	0	2	1805.94			35064.3	403	418	Empty	true
Exp1_01	Transgelin-2 OS=Homo sapiens GN=TAGLN2 PE=1 SV=3	TAGL2_HUMAN	swissprot_2012.fasta	22391.9	100.0%	4	4	4	0.0285%	22.6%	GASQAGMTGYGMPR	R	Q	99.3%	22.2	26.0	22.2	2.96	0	1	0	0	2	1383.61			5737.86	183	196	Empty	true
Exp1_01	Transgelin-2 OS=Homo sapiens GN=TAGLN2 PE=1 SV=3	TAGL2_HUMAN	swissprot_2012.fasta	22391.9	100.0%	4	4	4	0.0285%	22.6%	GPAYGLSR	R	E	98.8%	26.0	26.6	26.0	2.49	0	1	0	0	2	8204312			5544.22	5	12	Empty	true
Exp1_01	Transgelin-2 OS=Homo sapiens GN=TAGLN2 PE=1 SV=3	TAGL2_HUMAN	swissprot_2012.fasta	22391.9	100.0%	4	4	4	0.0285%	22.6%	NVIGLQMGTNR	K	G	99.7%	53.9	29.7	53.9	2.40	0	1	0	0	2	1202.63			3510.62	172	182	Empty	true
Exp1_01	Transgelin-2 OS=Homo sapiens GN=TAGLN2 PE=1 SV=3	TAGL2_HUMAN	swissprot_2012.fasta	22391.9	100.0%	4	4	4	0.0285%	22.6%	TLMNLGGLAVAR	R	D	99.7%	62.3	27.2	51.5	3.41	0	1	0	0	2	1215.69			2448.42	128	139	Empty	true
Exp1_01	Leukocyte surface antigen CD47 OS=Homo sapiens GN=CD47 PE=1 SV=1	CD47_HUMAN	swissprot_2012.fasta	35214.9	99.8%	2	2	2	0.0143%	5.88%	IEVSQLLK	K	G	96.8%	36.3	25.8	12.9	0.000	0	1	0	0	2	9295667			4168.06	86	93	Empty	true
Exp1_01	Leukocyte surface antigen CD47 OS=Homo sapiens GN=CD47 PE=1 SV=1	CD47_HUMAN	swissprot_2012.fasta	35214.9	99.8%	2	2	2	0.0143%	5.88%	STVPTDFSSAK	K	I	98.2%	27.6	26.5	27.6	1.44	0	1	0	0	2	1139.56			8637.85	75	85	Empty	true
Exp1_01	Integrin alpha-6 OS=Homo sapiens GN=ITGA6 PE=1 SV=4	ITA6_HUMAN	swissprot_2012.fasta	126636	99.8%	2	2	2	0.0143%	2.30%	LLLVGAPR	R	A	99.7%	36.0	25.0	14.9	1.21	0	1	0	0	2	8385510			5084.37	61	68	Empty	true
Exp1_01	Integrin alpha-6 OS=Homo sapiens GN=ITGA6 PE=1 SV=4	ITA6_HUMAN	swissprot_2012.fasta	126636	99.8%	2	2	2	0.0143%	2.30%	LRPIPITASVEIQEPSSR	K	R	96.5%	21.0	25.0	21.0	1.70	0	0	1	0	2	1993.11			8849.55	616	633	Empty	true
Exp1_01	Tubulin alpha-1B chain OS=Homo sapiens GN=TUBA1B PE=1 SV=1	TBA1B_HUMANTBA1C_HUMAN	swissprot_2012.fasta	50151.7	99.9%	2	2	2	0.0143%	6.43%	LDHKFDLMYAK	R	R	99.7%	45.8	28.6	17.5	1.80	0	0	1	0	2	1380.7			7028.79	391	401	Empty	true	TBA4A_HUMAN
Exp1_01	Tubulin alpha-1B chain OS=Homo sapiens GN=TUBA1B PE=1 SV=1	TBA1B_HUMANTBA1C_HUMAN	swissprot_2012.fasta	50151.7	99.9%	2	2	2	0.0143%	6.43%	VGINYQPPTVVPGGDLAK	K	V	99.7%	48.7	27.5	32.4	4.52	0	1	0	0	2	1824.99			9972.33	353	370	Empty	true	TBA4A_HUMAN
Exp1_01	Tenascin OS=Homo sapiens GN=TNC PE=1 SV=3	TENA_HUMAN	swissprot_2012.fasta	240850	100.0%	4	4	4	0.0285%	2.04%	ETFTTGLDAPR	K	N	99.7%	38.8	29.4	38.8	1.66	0	1	0	0	2	1207.6			8258.9	887	897	Empty	true
Exp1_01	Tenascin OS=Homo sapiens GN=TNC PE=1 SV=3	TENA_HUMAN	swissprot_2012.fasta	240850	100.0%	4	4	4	0.0285%	2.04%	ITAQGQYELR	K	V	99.7%	51.9	28.5	36.3	2.36	0	1	0	0	2	1178.62			4316.48	2064	2073	Empty	true
Exp1_01	Tenascin OS=Homo sapiens GN=TNC PE=1 SV=3	TENA_HUMAN	swissprot_2012.fasta	240850	100.0%	4	4	4	0.0285%	2.04%	LEELENLVSSLR	R	E	96.9%	28.3	29.1	15.8	1.85	0	1	0	0	2	1402.74			13002.9	126	137	Empty	true
Exp1_01	Tenascin OS=Homo sapiens GN=TNC PE=1 SV=3	TENA_HUMAN	swissprot_2012.fasta	240850	100.0%	4	4	4	0.0285%	2.04%	NMNKEDEGEITK	R	S	98.8%	25.6	27.2	9.02	2.52	0	0	1	0	2	1407.64			7225.31	748	759	Empty	true
Exp1_01	Apolipoprotein C-IV OS=Homo sapiens GN=APOC4 PE=1 SV=1	APOC4_HUMAN	swissprot_2012.fasta	14553.5	100.0%	3	4	4	0.0285%	18.1%	ELLETVVNR	K	T	99.2%	44.4	28.1	28.5	0.000	0	1	0	0	2	1072.6			25687.4	56	64	Empty	true
Exp1_01	Apolipoprotein C-IV OS=Homo sapiens GN=APOC4 PE=1 SV=1	APOC4_HUMAN	swissprot_2012.fasta	14553.5	100.0%	3	4	4	0.0285%	18.1%	GFMQTYYDDHLR	R	D	99.7%	67.6	25.3	67.6	2.80	0	1	0	0	2	1545.68			10206.7	80	91	Empty	true
Exp1_01	Apolipoprotein C-IV OS=Homo sapiens GN=APOC4 PE=1 SV=1	APOC4_HUMAN	swissprot_2012.fasta	14553.5	100.0%	3	4	4	0.0285%	18.1%	MKELLETVVNR	R	T	99.7%	59.1	27.6	31.8	0.000	0	1	1	0	2	1331.74			45568.1	54	64	Empty	true
Exp1_01	Galectin-3-binding protein OS=Homo sapiens GN=LGALS3BP PE=1 SV=1	LG3BP_HUMAN	swissprot_2012.fasta	65332.1	100.0%	15	18	18	0.128%	29.6%	ASHEEVEGLVEK	R	I	99.7%	56.6	28.2	44.6	6.03	0	1	1	0	2	1326.65			509766	334	345	Empty	true
Exp1_01	Galectin-3-binding protein OS=Homo sapiens GN=LGALS3BP PE=1 SV=1	LG3BP_HUMAN	swissprot_2012.fasta	65332.1	100.0%	15	18	18	0.128%	29.6%	AVDTWSWGER	K	A	99.7%	57.1	27.5	37.0	4.32	0	1	0	0	2	1206.55			33357.6	324	333	Empty	true
Exp1_01	Galectin-3-binding protein OS=Homo sapiens GN=LGALS3BP PE=1 SV=1	LG3BP_HUMAN	swissprot_2012.fasta	65332.1	100.0%	15	18	18	0.128%	29.6%	ELSEALGQIFDSQR	R	G	99.7%	36.5	29.9	36.5	3.19	0	0	1	0	2	1592.79			3371.83	138	151	Empty	true
Exp1_01	Galectin-3-binding protein OS=Homo sapiens GN=LGALS3BP PE=1 SV=1	LG3BP_HUMAN	swissprot_2012.fasta	65332.1	100.0%	15	18	18	0.128%	29.6%	IDITLSSVK	R	C	99.7%	66.4	25.0	52.6	2.96	0	1	0	0	2	9755722			27752.2	217	225	Empty	true
Exp1_01	Galectin-3-binding protein OS=Homo sapiens GN=LGALS3BP PE=1 SV=1	LG3BP_HUMAN	swissprot_2012.fasta	65332.1	100.0%	15	18	18	0.128%	29.6%	IYTSPTWSAFVTDSSWSAR	R	K	99.7%	120	29.6	120	11.9	0	1	0	0	2	2162.02			25190.8	408	426	Empty	true
Exp1_01	Galectin-3-binding protein OS=Homo sapiens GN=LGALS3BP PE=1 SV=1	LG3BP_HUMAN	swissprot_2012.fasta	65332.1	100.0%	15	18	18	0.128%	29.6%	KSQLVYQSR	R	R	99.7%	50.7	26.5	36.3	0.000	0	1	0	0	2	1108.61			25617.7	427	435	Empty	true
Exp1_01	Galectin-3-binding protein OS=Homo sapiens GN=LGALS3BP PE=1 SV=1	LG3BP_HUMAN	swissprot_2012.fasta	65332.1	100.0%	15	18	18	0.128%	29.6%	LADGGATNQGR	R	V	99.7%	56.2	27.5	44.7	1.64	0	1	0	0	2	1059.52			2459.51	26	36	Empty	true
Exp1_01	Galectin-3-binding protein OS=Homo sapiens GN=LGALS3BP PE=1 SV=1	LG3BP_HUMAN	swissprot_2012.fasta	65332.1	100.0%	15	18	18	0.128%	29.6%	RIDITLSSVK	R	C	99.7%	59.4	25.0	38.4	4.06	0	1	0	0	2	1131.67			109201	216	225	Empty	true
Exp1_01	Galectin-3-binding protein OS=Homo sapiens GN=LGALS3BP PE=1 SV=1	LG3BP_HUMAN	swissprot_2012.fasta	65332.1	100.0%	15	18	18	0.128%	29.6%	SDLAVPSELALLK	R	A	99.7%	44.0	25.5	21.5	4.16	0	1	0	0	2	1355.78			36224.5	311	323	Empty	true
Exp1_01	Galectin-3-binding protein OS=Homo sapiens GN=LGALS3BP PE=1 SV=1	LG3BP_HUMAN	swissprot_2012.fasta	65332.1	100.0%	15	18	18	0.128%	29.6%	SQLVYQSR	K	R	99.5%	44.6	26.3	26.8	0.000	0	1	0	0	2	9805159			19781.1	428	435	Empty	true
Exp1_01	Galectin-3-binding protein OS=Homo sapiens GN=LGALS3BP PE=1 SV=1	LG3BP_HUMAN	swissprot_2012.fasta	65332.1	100.0%	15	18	18	0.128%	29.6%	STHTLDLSR	R	E	99.7%	39.1	26.9	24.0	2.08	0	1	0	0	2	1029.53			31747.1	129	137	Empty	true
Exp1_01	Galectin-3-binding protein OS=Homo sapiens GN=LGALS3BP PE=1 SV=1	LG3BP_HUMAN	swissprot_2012.fasta	65332.1	100.0%	15	18	18	0.128%	29.6%	STSSFPCPAGHFNGFR	K	T	99.7%	28.2	25.7	28.2	4.20	0	1	0	0	2	1769.77			20521.7	555	570	Empty	true
Exp1_01	Galectin-3-binding protein OS=Homo sapiens GN=LGALS3BP PE=1 SV=1	LG3BP_HUMAN	swissprot_2012.fasta	65332.1	100.0%	15	18	18	0.128%	29.6%	TLQALEFHTVPFQLLAR	K	Y	99.7%	58.2	25.0	45.1	3.42	0	1	1	0	2	1984.1			320645	377	393	Empty	true
Exp1_01	Galectin-3-binding protein OS=Homo sapiens GN=LGALS3BP PE=1 SV=1	LG3BP_HUMAN	swissprot_2012.fasta	65332.1	100.0%	15	18	18	0.128%	29.6%	YSSDYFQAPSDYR	K	Y	99.7%	77.0	25.0	77.0	6.09	0	1	1	0	2	1598.68			28214.5	442	454	Empty	true
Exp1_01	Galectin-3-binding protein OS=Homo sapiens GN=LGALS3BP PE=1 SV=1	LG3BP_HUMAN	swissprot_2012.fasta	65332.1	100.0%	15	18	18	0.128%	29.6%	YYPYQSFQTPQHPSFLFQDK	R	R	99.7%	46.5	30.0	46.5	3.25	0	0	1	0	2	2521.18			32878.5	455	474	Empty	true
Exp1_01	Immunoglobulin J chain OS=Homo sapiens GN=IGJ PE=1 SV=4	IGJ_HUMAN	swissprot_2012.fasta	18098.5	99.8%	2	3	4	0.0285%	12.6%	IIVPLNNR	R	E	96.1%	34.8	25.0	22.1	0.000	0	1	0	0	2	9385782			68600.5	62	69	Empty	true
Exp1_01	Immunoglobulin J chain OS=Homo sapiens GN=IGJ PE=1 SV=4	IGJ_HUMAN	swissprot_2012.fasta	18098.5	99.8%	2	3	4	0.0285%	12.6%	SSEDPNEDIVER	R	N	99.7%	79.4	25.0	64.7	6.28	0	3	0	0	2	1389.61			13965.6	47	58	Empty	true
Exp1_01	Vitamin K-dependent protein Z OS=Homo sapiens GN=PROZ PE=1 SV=2	PROZ_HUMAN	swissprot_2012.fasta	44742.6	100.0%	5	5	5	0.0356%	14.2%	APDLQDLPWQVK	R	L	99.7%	57.3	28.5	43.8	5.64	0	1	0	0	2	1409.74			9522.24	182	193	Empty	true
Exp1_01	Vitamin K-dependent protein Z OS=Homo sapiens GN=PROZ PE=1 SV=2	PROZ_HUMAN	swissprot_2012.fasta	44742.6	100.0%	5	5	5	0.0356%	14.2%	DFAEHLLIPR	K	T	99.7%	41.6	26.2	27.5	2.04	0	0	1	0	2	1210.66			18430	286	295	Empty	true
Exp1_01	Vitamin K-dependent protein Z OS=Homo sapiens GN=PROZ PE=1 SV=2	PROZ_HUMAN	swissprot_2012.fasta	44742.6	100.0%	5	5	5	0.0356%	14.2%	ENFVLTTAK	R	C	99.7%	41.0	26.4	4.39	1.48	0	1	0	0	2	1022.55			12431.8	210	218	Empty	true
Exp1_01	Vitamin K-dependent protein Z OS=Homo sapiens GN=PROZ PE=1 SV=2	PROZ_HUMAN	swissprot_2012.fasta	44742.6	100.0%	5	5	5	0.0356%	14.2%	GSWFLTGVLGSQPVGGQAHMVLVTK	R	V	99.7%	36.6	27.2	36.6	2.11	0	0	1	0	2	2569.36			6550.01	363	387	Empty	true
Exp1_01	Vitamin K-dependent protein Z OS=Homo sapiens GN=PROZ PE=1 SV=2	PROZ_HUMAN	swissprot_2012.fasta	44742.6	100.0%	5	5	5	0.0356%	14.2%	RAPDLQDLPWQVK	K	L	99.0%	27.8	27.5	15.2	1.89	0	0	1	0	2	1565.84			18033.4	181	193	Empty	true
Exp1_01	Thrombospondin-4 OS=Homo sapiens GN=THBS4 PE=1 SV=2	TSP4_HUMAN	swissprot_2012.fasta	105869	100.0%	3	3	3	0.0214%	5.62%	AFAGPSQKPETIELR	R	T	99.5%	32.4	29.6	22.1	1.68	0	0	1	0	2	1643.88			14184.9	159	173	Empty	true
Exp1_01	Thrombospondin-4 OS=Homo sapiens GN=THBS4 PE=1 SV=2	TSP4_HUMAN	swissprot_2012.fasta	105869	100.0%	3	3	3	0.0214%	5.62%	AVAEPGIQLK	R	A	98.1%	37.7	25.0	0.000	0.000	0	1	0	0	2	1025.6			10585.4	828	837	Empty	true	COMP_HUMAN
Exp1_01	Thrombospondin-4 OS=Homo sapiens GN=THBS4 PE=1 SV=2	TSP4_HUMAN	swissprot_2012.fasta	105869	100.0%	3	3	3	0.0214%	5.62%	FYVVMWK	S	Q	96.4%	27.9	28.9	27.9	1.24	0	1	0	0	1	9725011			5580.24	808	814	Empty	false	TSP1_HUMANCOMP_HUMAN
Exp1_01	Thrombospondin-4 OS=Homo sapiens GN=THBS4 PE=1 SV=2	TSP4_HUMAN	swissprot_2012.fasta	105869	100.0%	3	3	3	0.0214%	5.62%	NSLWHTGDTSDQVR	R	L	99.7%	51.0	27.7	51.0	3.59	0	1	0	0	2	1615.75			7642.89	851	864	Empty	true
Exp1_01	Thrombospondin-4 OS=Homo sapiens GN=THBS4 PE=1 SV=2	TSP4_HUMAN	swissprot_2012.fasta	105869	100.0%	3	3	3	0.0214%	5.62%	TGPGEHLR	K	N	99.7%	39.8	25.1	25.7	2.96	0	1	0	0	2	8664480			6373.88	843	850	Empty	false	TSP1_HUMAN
Exp1_01	Alpha-1B-glycoprotein OS=Homo sapiens GN=A1BG PE=1 SV=4	A1BG_HUMAN	swissprot_2012.fasta	54253.3	100.0%	2	2	2	0.0143%	6.87%	SGLSTGWTQLSK	R	L	99.7%	58.4	29.1	39.5	2.33	0	1	0	0	2	1264.65			8754.02	95	106	Empty	true
Exp1_01	Alpha-1B-glycoprotein OS=Homo sapiens GN=A1BG PE=1 SV=4	A1BG_HUMAN	swissprot_2012.fasta	54253.3	100.0%	2	2	2	0.0143%	6.87%	TPGAAANLELIFVGPQHAGNYR	R	C	99.7%	97.5	29.1	97.5	7.89	0	0	1	0	2	2296.18			9258.8	448	469	Empty	true
Exp1_01	Moesin OS=Homo sapiens GN=MSN PE=1 SV=3	MOES_HUMAN	swissprot_2012.fasta	67821.8	100.0%	8	8	8	0.0570%	15.4%	ALTSELANAR	K	D	99.7%	61.3	30.3	48.1	1.41	0	1	0	0	2	1045.56			4200.61	524	533	Empty	true
Exp1_01	Moesin OS=Homo sapiens GN=MSN PE=1 SV=3	MOES_HUMAN	swissprot_2012.fasta	67821.8	100.0%	8	8	8	0.0570%	15.4%	APDFVFYAPR	K	L	99.7%	54.6	27.2	54.6	1.28	0	1	0	0	2	1182.59			15708.9	264	273	Empty	true
Exp1_01	Moesin OS=Homo sapiens GN=MSN PE=1 SV=3	MOES_HUMAN	swissprot_2012.fasta	67821.8	100.0%	8	8	8	0.0570%	15.4%	AQQELEEQTR	K	R	99.7%	49.1	28.4	20.7	1.52	0	1	0	0	2	1231.59			3452.4	361	370	Empty	true
Exp1_01	Moesin OS=Homo sapiens GN=MSN PE=1 SV=3	MOES_HUMAN	swissprot_2012.fasta	67821.8	100.0%	8	8	8	0.0570%	15.4%	ERQEAEEAKEALLQASR	K	D	97.9%	34.7	29.6	21.8	0.000	0	0	0	1	2	1957.99			8487.15	392	408	Empty	true
Exp1_01	Moesin OS=Homo sapiens GN=MSN PE=1 SV=3	MOES_HUMAN	swissprot_2012.fasta	67821.8	100.0%	8	8	8	0.0570%	15.4%	GMLREDAVLEYLK	R	I	99.7%	45.8	28.6	33.6	2.77	0	0	1	0	2	1536.81			18989.5	181	193	Empty	true
Exp1_01	Moesin OS=Homo sapiens GN=MSN PE=1 SV=3	MOES_HUMAN	swissprot_2012.fasta	67821.8	100.0%	8	8	8	0.0570%	15.4%	IGFPWSEIR	K	N	99.7%	48.7	29.1	32.8	2.68	0	1	0	0	2	1104.58			15330.6	238	246	Empty	true
Exp1_01	Moesin OS=Homo sapiens GN=MSN PE=1 SV=3	MOES_HUMAN	swissprot_2012.fasta	67821.8	100.0%	8	8	8	0.0570%	15.4%	ISQLEMAR	R	Q	99.7%	57.3	28.7	27.5	1.54	0	1	0	0	2	9474979			5401.7	428	435	Empty	true
Exp1_01	Moesin OS=Homo sapiens GN=MSN PE=1 SV=3	MOES_HUMAN	swissprot_2012.fasta	67821.8	100.0%	8	8	8	0.0570%	15.4%	RKPDTIEVQQMK	R	A	99.7%	38.8	28.7	38.8	1.48	0	0	1	0	2	1472.79			8202.75	295	306	Empty	true
Exp1_01	14-3-3 protein gamma OS=Homo sapiens GN=YWHAG PE=1 SV=2	1433G_HUMAN	swissprot_2012.fasta	28303.1	99.8%	2	2	2	0.0143%	12.6%	NLLSVAYK	R	N	99.6%	44.6	25.0	19.5	0.000	0	1	0	0	2	9075247			30700.9	43	50	Empty	false	1433Z_HUMAN1433T_HUMAN1433B_HUMAN1433E_HUMAN1433F_HUMAN
Exp1_01	14-3-3 protein gamma OS=Homo sapiens GN=YWHAG PE=1 SV=2	1433G_HUMAN	swissprot_2012.fasta	28303.1	99.8%	2	2	2	0.0143%	12.6%	NVTELNEPLSNEER	K	N	99.7%	80.0	28.5	65.6	4.74	0	1	0	0	2	1643.79			4143.46	29	42	Empty	true
Exp1_01	14-3-3 protein gamma OS=Homo sapiens GN=YWHAG PE=1 SV=2	1433G_HUMAN	swissprot_2012.fasta	28303.1	99.8%	2	2	2	0.0143%	12.6%	VDREQLVQK	M	A	96.4%	27.5	28.4	9.83	1.40	0	1	0	0	1	1156.63			12561.9	2	10	Empty	true
Exp1_01	Hyaluronan-binding protein 2 OS=Homo sapiens GN=HABP2 PE=1 SV=1	HABP2_HUMAN	swissprot_2012.fasta	62671.4	100.0%	10	13	18	0.128%	11.4%	DEIPHNDIALLK	R	L	99.7%	46.7	28.8	12.9	2.59	0	1	0	0	2	1377.74			12344.7	405	416	Empty	true
Exp1_01	Hyaluronan-binding protein 2 OS=Homo sapiens GN=HABP2 PE=1 SV=1	HABP2_HUMAN	swissprot_2012.fasta	62671.4	100.0%	10	13	18	0.128%	11.4%	EEFHEQSFR	K	V	99.7%	42.7	25.8	24.8	2.64	0	1	0	0	2	1208.53			22988.4	383	391	Empty	true
Exp1_01	Hyaluronan-binding protein 2 OS=Homo sapiens GN=HABP2 PE=1 SV=1	HABP2_HUMAN	swissprot_2012.fasta	62671.4	100.0%	10	13	18	0.128%	11.4%	FLNWIK	K	A	97.5%	37.8	26.2	15.4	0.000	0	1	0	0	2	8204716			202506	546	551	Empty	true
Exp1_01	Hyaluronan-binding protein 2 OS=Homo sapiens GN=HABP2 PE=1 SV=1	HABP2_HUMAN	swissprot_2012.fasta	62671.4	100.0%	10	13	18	0.128%	11.4%	KEEFHEQSFR	K	V	99.7%	39.9	28.7	26.3	1.82	0	1	1	0	2	1336.63			285861	382	391	Empty	true
Exp1_01	Hyaluronan-binding protein 2 OS=Homo sapiens GN=HABP2 PE=1 SV=1	HABP2_HUMAN	swissprot_2012.fasta	62671.4	100.0%	10	13	18	0.128%	11.4%	LIANTLCNSR	K	Q	99.7%	63.1	29.3	63.1	3.08	0	5	0	0	2	1162.59			410639	471	480	Empty	true
Exp1_01	Hyaluronan-binding protein 2 OS=Homo sapiens GN=HABP2 PE=1 SV=1	HABP2_HUMAN	swissprot_2012.fasta	62671.4	100.0%	10	13	18	0.128%	11.4%	RPGVYTQVTK	K	F	99.7%	35.4	25.9	35.4	2.55	0	1	0	0	2	1148.64			726993	536	545	Empty	true
Exp1_01	Hyaluronan-binding protein 2 OS=Homo sapiens GN=HABP2 PE=1 SV=1	HABP2_HUMAN	swissprot_2012.fasta	62671.4	100.0%	10	13	18	0.128%	11.4%	VVLGDQDLK	K	K	99.2%	32.2	28.4	17.6	1.74	0	1	0	0	2	9865519			17704.5	373	381	Empty	true
Exp1_01	Hyaluronan-binding protein 2 OS=Homo sapiens GN=HABP2 PE=1 SV=1	HABP2_HUMAN	swissprot_2012.fasta	62671.4	100.0%	10	13	18	0.128%	11.4%	VVLGDQDLKK	K	E	99.7%	43.3	25.8	31.7	2.68	0	1	0	0	2	1114.65			65177.1	373	382	Empty	true
Exp1_01	Hyaluronan-binding protein 2 OS=Homo sapiens GN=HABP2 PE=1 SV=1	HABP2_HUMAN	swissprot_2012.fasta	62671.4	100.0%	10	13	18	0.128%	11.4%	VVLGDQDLKKEEFHEQSFR	K	V	99.7%	52.0	29.8	41.7	3.70	0	0	1	1	2	2304.16			308932	373	391	Empty	true
Exp1_01	Hyaluronan-binding protein 2 OS=Homo sapiens GN=HABP2 PE=1 SV=1	HABP2_HUMAN	swissprot_2012.fasta	62671.4	100.0%	10	13	18	0.128%	11.4%	YSHYNERDEIPHNDIALLK	K	L	99.7%	34.7	30.1	34.7	2.33	0	0	3	0	2	2327.14			77900.6	398	416	Empty	true
Exp1_01	14-3-3 protein epsilon OS=Homo sapiens GN=YWHAE PE=1 SV=1	1433E_HUMAN	swissprot_2012.fasta	29175	99.8%	2	2	2	0.0143%	12.5%	HLIPAANTGESK	K	V	99.1%	31.5	28.2	16.5	1.77	0	1	0	0	2	1237.65			5810.48	107	118	Empty	true
Exp1_01	14-3-3 protein epsilon OS=Homo sapiens GN=YWHAE PE=1 SV=1	1433E_HUMAN	swissprot_2012.fasta	29175	99.8%	2	2	2	0.0143%	12.5%	MDDREDLVYQAK	-	L	99.7%	39.0	27.6	9.09	3.46	0	1	0	0	2	1524.7			4161.56	1	12	Empty	true
Exp1_01	14-3-3 protein epsilon OS=Homo sapiens GN=YWHAE PE=1 SV=1	1433E_HUMAN	swissprot_2012.fasta	29175	99.8%	2	2	2	0.0143%	12.5%	NLLSVAYK	R	N	99.6%	44.6	25.0	19.5	0.000	0	1	0	0	2	9075247			30700.9	43	50	Empty	false	1433Z_HUMAN1433T_HUMAN1433B_HUMAN1433G_HUMAN1433F_HUMAN
Exp1_01	Myosin light polypeptide 6 OS=Homo sapiens GN=MYL6 PE=1 SV=2	MYL6_HUMAN	swissprot_2012.fasta	16929.8	100.0%	4	5	5	0.0356%	34.4%	ALGQNPTNAEVLK	R	V	99.7%	49.7	27.3	37.6	3.29	0	1	0	0	2	1354.73			4301.78	38	50	Empty	true
Exp1_01	Myosin light polypeptide 6 OS=Homo sapiens GN=MYL6 PE=1 SV=2	MYL6_HUMAN	swissprot_2012.fasta	16929.8	100.0%	4	5	5	0.0356%	34.4%	EAFQLFDR	K	T	99.7%	44.1	27.4	10.7	1.34	0	1	0	0	2	1025.51			9979.95	14	21	Empty	true
Exp1_01	Myosin light polypeptide 6 OS=Homo sapiens GN=MYL6 PE=1 SV=2	MYL6_HUMAN	swissprot_2012.fasta	16929.8	100.0%	4	5	5	0.0356%	34.4%	NKDQGTYEDYVEGLR	K	V	99.7%	51.2	27.9	33.9	2.64	0	0	1	0	2	1786.82			35524.9	80	94	Empty	true
Exp1_01	Myosin light polypeptide 6 OS=Homo sapiens GN=MYL6 PE=1 SV=2	MYL6_HUMAN	swissprot_2012.fasta	16929.8	100.0%	4	5	5	0.0356%	34.4%	VFDKEGNGTVMGAEIR	R	H	99.7%	51.6	29.4	0.000	3.38	0	0	2	0	2	1723.83			38611.6	95	110	Empty	true
Exp1_01	Apolipoprotein(a) OS=Homo sapiens GN=LPA PE=1 SV=1	APOA_HUMAN	swissprot_2012.fasta	501289	100.0%	15	18	21	0.150%	3.76%	FVTWIEGMMR	R	N	99.7%	48.4	27.6	36.9	1.77	0	1	0	0	2	1269.61			1753.87	4537	4546	Empty	true
Exp1_01	Apolipoprotein(a) OS=Homo sapiens GN=LPA PE=1 SV=1	APOA_HUMAN	swissprot_2012.fasta	501289	100.0%	15	18	21	0.150%	3.76%	GISSTTVTGR	R	T	99.7%	54.4	27.5	43.5	4.92	0	1	0	0	2	9785215			19583.5	4020	4029	Empty	true
Exp1_01	Apolipoprotein(a) OS=Homo sapiens GN=LPA PE=1 SV=1	APOA_HUMAN	swissprot_2012.fasta	501289	100.0%	15	18	21	0.150%	3.76%	GSFSTTVTGR	R	T	99.7%	63.5	26.3	49.7	1.82	0	1	0	0	2	1012.51			59791.5	3686	3695	Empty	true
Exp1_01	Apolipoprotein(a) OS=Homo sapiens GN=LPA PE=1 SV=1	APOA_HUMAN	swissprot_2012.fasta	501289	100.0%	15	18	21	0.150%	3.76%	GTFSTTVTGR	R	T	99.7%	61.1	26.6	50.3	1.74	0	1	0	0	2	1026.52			21120.4	4134	4143	Empty	true
Exp1_01	Apolipoprotein(a) OS=Homo sapiens GN=LPA PE=1 SV=1	APOA_HUMAN	swissprot_2012.fasta	501289	100.0%	15	18	21	0.150%	3.76%	GTLSTTITGR	R	T	99.7%	40.2	27.5	40.2	1.25	0	1	0	0	2	1006.55			380811	3906	3915	Empty	true
Exp1_01	Apolipoprotein(a) OS=Homo sapiens GN=LPA PE=1 SV=1	APOA_HUMAN	swissprot_2012.fasta	501289	100.0%	15	18	21	0.150%	3.76%	GTYSTTVTGR	R	T	99.7%	65.0	26.4	65.0	0.000	0	3	0	0	2	1042.52			394122	38	47	Empty	true
Exp1_01	Apolipoprotein(a) OS=Homo sapiens GN=LPA PE=1 SV=1	APOA_HUMAN	swissprot_2012.fasta	501289	100.0%	15	18	21	0.150%	3.76%	HSTFIPGTNK	R	W	99.7%	41.4	29.3	41.4	3.02	0	1	0	0	2	1101.57			27959	4260	4269	Empty	true
Exp1_01	Apolipoprotein(a) OS=Homo sapiens GN=LPA PE=1 SV=1	APOA_HUMAN	swissprot_2012.fasta	501289	100.0%	15	18	21	0.150%	3.76%	IPLYYPNAGLTR	R	N	95.8%	24.8	27.8	12.1	1.68	0	1	0	0	2	1377.75			19641.3	3931	3942	Empty	true
Exp1_01	Apolipoprotein(a) OS=Homo sapiens GN=LPA PE=1 SV=1	APOA_HUMAN	swissprot_2012.fasta	501289	100.0%	15	18	21	0.150%	3.76%	LFLEPTQADIALLK	R	L	99.7%	83.2	25.0	46.3	5.21	0	1	0	0	2	1571.9			18579.4	4404	4417	Empty	true
Exp1_01	Apolipoprotein(a) OS=Homo sapiens GN=LPA PE=1 SV=1	APOA_HUMAN	swissprot_2012.fasta	501289	100.0%	15	18	21	0.150%	3.76%	RIPLYYPNAGLTR	R	N	99.7%	46.5	26.8	32.2	2.96	0	1	1	0	2	1533.85			14635.5	3930	3942	Empty	true
Exp1_01	Apolipoprotein(a) OS=Homo sapiens GN=LPA PE=1 SV=1	APOA_HUMAN	swissprot_2012.fasta	501289	100.0%	15	18	21	0.150%	3.76%	TPAYYPNAGLIK	R	N	99.7%	48.1	27.2	33.3	3.77	0	1	0	0	2	1307.7			55873.5	3483	3494	Empty	true
Exp1_01	Apolipoprotein(a) OS=Homo sapiens GN=LPA PE=1 SV=1	APOA_HUMAN	swissprot_2012.fasta	501289	100.0%	15	18	21	0.150%	3.76%	TPENYPNAGLTR	R	N	99.7%	73.1	29.2	57.6	2.31	0	2	0	0	2	1332.65			73672.4	3597	3608	Empty	true
Exp1_01	Apolipoprotein(a) OS=Homo sapiens GN=LPA PE=1 SV=1	APOA_HUMAN	swissprot_2012.fasta	501289	100.0%	15	18	21	0.150%	3.76%	TPEYYPNAGLIMNYCR	R	N	99.7%	56.8	27.6	56.8	6.24	0	2	0	0	2	1962.87			15405.1	177	192	Empty	true
Exp1_01	Apolipoprotein(a) OS=Homo sapiens GN=LPA PE=1 SV=1	APOA_HUMAN	swissprot_2012.fasta	501289	100.0%	15	18	21	0.150%	3.76%	TTEYYPNGGLTR	R	N	99.7%	39.3	27.0	39.3	3.59	0	2	0	0	2	1372.64			33753.4	3711	3722	Empty	true
Exp1_01	Apolipoprotein(a) OS=Homo sapiens GN=LPA PE=1 SV=1	APOA_HUMAN	swissprot_2012.fasta	501289	100.0%	15	18	21	0.150%	3.76%	VILGAHQEVNLESHVQEIEVSR	K	L	99.7%	76.3	28.7	76.3	5.92	0	0	1	0	2	2486.3			19332.9	4382	4403	Empty	true
Exp1_01	Fibronectin OS=Homo sapiens GN=FN1 PE=1 SV=4	FINC_HUMAN	swissprot_2012.fasta	262617	100.0%	8	8	8	0.0570%	4.99%	HTSVQTTSSGSGPFTDVR	R	A	99.3%	31.0	29.6	31.0	1.82	0	0	1	0	2	1863.88			4751.4	273	290	Empty	true
Exp1_01	Fibronectin OS=Homo sapiens GN=FN1 PE=1 SV=4	FINC_HUMAN	swissprot_2012.fasta	262617	100.0%	8	8	8	0.0570%	4.99%	HYQINQQWER	K	T	99.7%	34.3	27.6	34.3	2.66	0	1	0	0	2	1401.67			8212.65	58	67	Empty	true
Exp1_01	Fibronectin OS=Homo sapiens GN=FN1 PE=1 SV=4	FINC_HUMAN	swissprot_2012.fasta	262617	100.0%	8	8	8	0.0570%	4.99%	IGDQWDKQHDMGHMMR	R	C	99.7%	31.5	25.0	31.5	1.24	0	0	0	1	2	1984.86			30378.5	480	495	Empty	true
Exp1_01	Fibronectin OS=Homo sapiens GN=FN1 PE=1 SV=4	FINC_HUMAN	swissprot_2012.fasta	262617	100.0%	8	8	8	0.0570%	4.99%	LGVRPSQGGEAPR	K	E	99.6%	42.8	26.9	19.9	0.000	0	0	1	0	2	1323.71			13071.9	1117	1129	Empty	true
Exp1_01	Fibronectin OS=Homo sapiens GN=FN1 PE=1 SV=4	FINC_HUMAN	swissprot_2012.fasta	262617	100.0%	8	8	8	0.0570%	4.99%	RPGGEPSPEGTTGQSYNQYSQR	R	Y	99.7%	49.4	27.9	49.4	5.51	0	0	1	0	2	2396.09			2549.03	2335	2356	Empty	true
Exp1_01	Fibronectin OS=Homo sapiens GN=FN1 PE=1 SV=4	FINC_HUMAN	swissprot_2012.fasta	262617	100.0%	8	8	8	0.0570%	4.99%	SSPVVIDASTAIDAPSNLR	R	F	99.7%	65.6	28.5	50.7	5.43	0	1	0	0	2	1913			4857.45	1892	1910	Empty	true
Exp1_01	Fibronectin OS=Homo sapiens GN=FN1 PE=1 SV=4	FINC_HUMAN	swissprot_2012.fasta	262617	100.0%	8	8	8	0.0570%	4.99%	VGDTYERPK	R	D	99.4%	45.5	28.3	30.7	0.000	0	1	0	0	2	1064.54			8137.33	108	116	Empty	true
Exp1_01	Fibronectin OS=Homo sapiens GN=FN1 PE=1 SV=4	FINC_HUMAN	swissprot_2012.fasta	262617	100.0%	8	8	8	0.0570%	4.99%	WSRPQAPITGYR	R	I	99.7%	43.7	29.8	43.7	2.29	0	0	1	0	2	1431.75			46653.2	831	842	Empty	true
Exp1_01	Erythrocyte band 7 integral membrane protein OS=Homo sapiens GN=STOM PE=1 SV=3	STOM_HUMAN	swissprot_2012.fasta	31732.1	100.0%	7	8	8	0.0570%	33.7%	AMAAEAEASR	R	E	99.7%	42.8	27.8	27.3	4.25	0	1	0	0	2	1006.46			12960.9	206	215	Empty	true
Exp1_01	Erythrocyte band 7 integral membrane protein OS=Homo sapiens GN=STOM PE=1 SV=3	STOM_HUMAN	swissprot_2012.fasta	31732.1	100.0%	7	8	8	0.0570%	33.7%	EASMVITESPAALQLR	K	Y	99.7%	91.1	29.5	61.7	4.89	0	1	0	0	2	1715.9			5176.55	236	251	Empty	true
Exp1_01	Erythrocyte band 7 integral membrane protein OS=Homo sapiens GN=STOM PE=1 SV=3	STOM_HUMAN	swissprot_2012.fasta	31732.1	100.0%	7	8	8	0.0570%	33.7%	LLAQTTLR	R	N	99.7%	51.2	26.3	31.8	4.00	0	1	0	0	2	9155623			10583.3	145	152	Empty	true
Exp1_01	Erythrocyte band 7 integral membrane protein OS=Homo sapiens GN=STOM PE=1 SV=3	STOM_HUMAN	swissprot_2012.fasta	31732.1	100.0%	7	8	8	0.0570%	33.7%	NSTIVFPLPIDMLQGIIGAK	K	H	99.7%	48.0	25.0	48.0	5.64	0	1	0	0	2	2127.19			5912.18	264	283	Empty	true
Exp1_01	Erythrocyte band 7 integral membrane protein OS=Homo sapiens GN=STOM PE=1 SV=3	STOM_HUMAN	swissprot_2012.fasta	31732.1	100.0%	7	8	8	0.0570%	33.7%	VIAAEGEMNASR	K	A	99.7%	81.2	29.2	62.0	8.68	0	2	0	0	2	1247.6			17016.7	221	232	Empty	true
Exp1_01	Erythrocyte band 7 integral membrane protein OS=Homo sapiens GN=STOM PE=1 SV=3	STOM_HUMAN	swissprot_2012.fasta	31732.1	100.0%	7	8	8	0.0570%	33.7%	VQNATLAVANITNADSATR	R	L	99.7%	109	29.5	109	10.6	0	1	0	0	2	1930			4586.82	126	144	Empty	true
Exp1_01	Erythrocyte band 7 integral membrane protein OS=Homo sapiens GN=STOM PE=1 SV=3	STOM_HUMAN	swissprot_2012.fasta	31732.1	100.0%	7	8	8	0.0570%	33.7%	YLQTLTTIAAEK	R	N	99.7%	53.5	26.9	53.5	2.21	0	1	0	0	2	1351.75			9872.78	252	263	Empty	true
Exp1_01	Hemopexin OS=Homo sapiens GN=HPX PE=1 SV=2	HEMO_HUMAN	swissprot_2012.fasta	51676.5	100.0%	4	4	5	0.0356%	8.87%	NFPSPVDAAFR	K	Q	99.7%	44.8	29.0	32.9	2.31	0	1	0	0	2	1220.61			12933	92	102	Empty	true
Exp1_01	Hemopexin OS=Homo sapiens GN=HPX PE=1 SV=2	HEMO_HUMAN	swissprot_2012.fasta	51676.5	100.0%	4	4	5	0.0356%	8.87%	RLWWLDLK	R	S	99.7%	41.3	27.5	0.0800	2.14	0	1	0	0	2	1129.65			17850.1	379	386	Empty	true
Exp1_01	Hemopexin OS=Homo sapiens GN=HPX PE=1 SV=2	HEMO_HUMAN	swissprot_2012.fasta	51676.5	100.0%	4	4	5	0.0356%	8.87%	SGAQATWTELPWPHEK	K	V	99.7%	60.4	29.7	60.4	6.24	0	0	2	0	2	1837.89			49630.9	387	402	Empty	true
Exp1_01	Hemopexin OS=Homo sapiens GN=HPX PE=1 SV=2	HEMO_HUMAN	swissprot_2012.fasta	51676.5	100.0%	4	4	5	0.0356%	8.87%	SHKWDR	K	E	95.1%	34.1	25.2	15.4	0.000	0	1	0	0	2	8284111			8979.73	78	83	Empty	true
Exp1_01	Ig kappa chain V-IV region (Fragment) OS=Homo sapiens GN=IGKV4-1 PE=4 SV=1	KV401_HUMANKV403_HUMAN	swissprot_2012.fasta	13380.3	100.0%	4	5	8	0.0570%	44.6%	DIVMTQSPDSLAVSLGER	G	A	99.7%	103	30.3	92.5	6.28	0	1	1	0	1	1917.96			8272.9	21	38	Empty	true
Exp1_01	Ig kappa chain V-IV region (Fragment) OS=Homo sapiens GN=IGKV4-1 PE=4 SV=1	KV401_HUMANKV403_HUMAN	swissprot_2012.fasta	13380.3	100.0%	4	5	8	0.0570%	44.6%	LLIYWASTR	K	E	99.7%	56.9	25.6	40.8	0.000	0	4	0	0	2	1122.63			37999.1	72	80	Empty	true
Exp1_01	Ig kappa chain V-IV region (Fragment) OS=Homo sapiens GN=IGKV4-1 PE=4 SV=1	KV401_HUMANKV403_HUMAN	swissprot_2012.fasta	13380.3	100.0%	4	5	8	0.0570%	44.6%	NYLAWYQQKPGQPPK	K	L	99.7%	42.7	29.9	42.7	7.27	0	1	0	0	2	1817.93			6205.2	57	71	Empty	true
Exp1_01	Ig kappa chain V-IV region (Fragment) OS=Homo sapiens GN=IGKV4-1 PE=4 SV=1	KV401_HUMANKV403_HUMAN	swissprot_2012.fasta	13380.3	100.0%	4	5	8	0.0570%	44.6%	SSQSVLYSSNNK	K	N	99.7%	73.9	27.3	62.0	3.44	0	1	0	0	2	1313.63			4054.86	45	56	Empty	true
Exp1_01	HLA class I histocompatibility antigen B-35 alpha chain OS=Homo sapiens GN=HLA-B PE=1 SV=1	1B35_HUMAN1B53_HUMAN	swissprot_2012.fasta	40454.8	100.0%	4	5	5	0.0356%	19.9%	APWIEQEGPEYWDR	R	N	99.7%	57.9	27.7	44.2	5.62	0	1	0	0	2	1775.8			6403.22	73	86	Empty	false	1A68_HUMAN
Exp1_01	HLA class I histocompatibility antigen B-35 alpha chain OS=Homo sapiens GN=HLA-B PE=1 SV=1	1B35_HUMAN1B53_HUMAN	swissprot_2012.fasta	40454.8	100.0%	4	5	5	0.0356%	19.9%	DGEDQTQDTELVETRPAGDR	R	T	99.7%	46.9	28.1	46.9	2.62	0	0	1	0	2	2232			10250	244	263	Empty	true
Exp1_01	HLA class I histocompatibility antigen B-35 alpha chain OS=Homo sapiens GN=HLA-B PE=1 SV=1	1B35_HUMAN1B53_HUMAN	swissprot_2012.fasta	40454.8	100.0%	4	5	5	0.0356%	19.9%	FDSDAASPR	R	T	99.7%	68.5	26.1	44.8	3.77	0	1	0	0	2	9654323			14472.5	60	68	Empty	true
Exp1_01	HLA class I histocompatibility antigen B-35 alpha chain OS=Homo sapiens GN=HLA-B PE=1 SV=1	1B35_HUMAN1B53_HUMAN	swissprot_2012.fasta	40454.8	100.0%	4	5	5	0.0356%	19.9%	THVTHHPVSDHEATLR	K	C	99.7%	52.0	30.2	52.0	2.31	0	0	1	1	2	1836.91			44070.4	211	226	Empty	true
Exp1_01	HLA class I histocompatibility antigen B-35 alpha chain OS=Homo sapiens GN=HLA-B PE=1 SV=1	1B35_HUMAN1B53_HUMAN	swissprot_2012.fasta	40454.8	100.0%	4	5	5	0.0356%	19.9%	WAAVVVPSGEEQR	K	Y	99.7%	49.8	28.8	0.000	0.000	0	1	0	0	2	1427.73			17816.3	268	280	Empty	true
Exp1_01	Keratin type II cytoskeletal 5 OS=Homo sapiens GN=KRT5 PE=1 SV=3	K2C5_HUMAN	swissprot_2012.fasta	62379.6	100.0%	8	8	8	0.0570%	17.8%	AQYEEIANR	K	S	99.7%	58.5	28.2	38.3	2.01	0	1	0	0	2	1093.53			15568	344	352	Empty	true
Exp1_01	Keratin type II cytoskeletal 5 OS=Homo sapiens GN=KRT5 PE=1 SV=3	K2C5_HUMAN	swissprot_2012.fasta	62379.6	100.0%	8	8	8	0.0570%	17.8%	FASFIDK	K	V	99.0%	29.3	26.3	0.000	2.29	0	1	0	0	2	8274298			22757.3	179	185	Empty	false	K22E_HUMANK2C73_HUMANK2C6A_HUMANK2C4_HUMANK2C6C_HUMANK2C1_HUMAN
Exp1_01	Keratin type II cytoskeletal 5 OS=Homo sapiens GN=KRT5 PE=1 SV=3	K2C5_HUMAN	swissprot_2012.fasta	62379.6	100.0%	8	8	8	0.0570%	17.8%	FASFIDKVR	K	F	99.7%	43.3	25.7	0.000	2.89	0	1	0	0	2	1082.6			18109.7	179	187	Empty	false	K22E_HUMANK2C73_HUMANK2C6A_HUMANK2C6C_HUMANK2C1_HUMAN
Exp1_01	Keratin type II cytoskeletal 5 OS=Homo sapiens GN=KRT5 PE=1 SV=3	K2C5_HUMAN	swissprot_2012.fasta	62379.6	100.0%	8	8	8	0.0570%	17.8%	HEISEMNR	K	M	99.7%	44.9	25.0	44.9	1.21	0	1	0	0	2	1015.46			5213.81	384	391	Empty	true
Exp1_01	Keratin type II cytoskeletal 5 OS=Homo sapiens GN=KRT5 PE=1 SV=3	K2C5_HUMAN	swissprot_2012.fasta	62379.6	100.0%	8	8	8	0.0570%	17.8%	ISISTSGGSFR	R	N	99.7%	62.8	27.7	62.8	4.14	0	1	0	0	2	1111.57			16984.4	74	84	Empty	true
Exp1_01	Keratin type II cytoskeletal 5 OS=Homo sapiens GN=KRT5 PE=1 SV=3	K2C5_HUMAN	swissprot_2012.fasta	62379.6	100.0%	8	8	8	0.0570%	17.8%	KYEDEINKR	N	T	99.7%	51.5	29.1	35.9	3.74	0	1	0	0	1	1194.61			12743.6	257	265	Empty	false	K22E_HUMANK2C6A_HUMANK2C6C_HUMANK2C1_HUMAN
Exp1_01	Keratin type II cytoskeletal 5 OS=Homo sapiens GN=KRT5 PE=1 SV=3	K2C5_HUMAN	swissprot_2012.fasta	62379.6	100.0%	8	8	8	0.0570%	17.8%	LALDVEIATYR	K	K	99.7%	72.5	26.7	28.9	5.70	0	1	0	0	2	1263.69			9234.07	461	471	Empty	false	K22E_HUMANK2C6A_HUMANK2C6C_HUMAN
Exp1_01	Keratin type II cytoskeletal 5 OS=Homo sapiens GN=KRT5 PE=1 SV=3	K2C5_HUMAN	swissprot_2012.fasta	62379.6	100.0%	8	8	8	0.0570%	17.8%	NKYEDEINKR	K	T	99.7%	58.6	28.8	35.6	1.46	0	1	1	0	2	1308.65			221784	256	265	Empty	false	K2C6A_HUMANK2C6C_HUMANK2C1_HUMAN
Exp1_01	Keratin type II cytoskeletal 5 OS=Homo sapiens GN=KRT5 PE=1 SV=3	K2C5_HUMAN	swissprot_2012.fasta	62379.6	100.0%	8	8	8	0.0570%	17.8%	NMQDLVEDFK	R	N	99.7%	53.7	27.5	41.1	3.15	0	1	0	0	2	1238.57			7519.5	246	255	Empty	true
Exp1_01	Keratin type II cytoskeletal 5 OS=Homo sapiens GN=KRT5 PE=1 SV=3	K2C5_HUMAN	swissprot_2012.fasta	62379.6	100.0%	8	8	8	0.0570%	17.8%	NTKHEISEMNR	R	M	99.7%	54.0	27.7	41.8	0.000	0	0	1	0	2	1358.65			41997.2	381	391	Empty	true
Exp1_01	Keratin type II cytoskeletal 5 OS=Homo sapiens GN=KRT5 PE=1 SV=3	K2C5_HUMAN	swissprot_2012.fasta	62379.6	100.0%	8	8	8	0.0570%	17.8%	SFSTASAITPSVSR	R	T	98.7%	30.4	28.2	30.4	1.37	0	1	0	0	2	1410.72			5302.75	16	29	Empty	true
Exp1_01	Keratin type II cytoskeletal 5 OS=Homo sapiens GN=KRT5 PE=1 SV=3	K2C5_HUMAN	swissprot_2012.fasta	62379.6	100.0%	8	8	8	0.0570%	17.8%	TEAESWYQTK	R	Y	99.7%	32.7	25.5	17.5	2.38	0	1	0	0	2	1242.56			6215.99	355	364	Empty	true
Exp1_01	Keratin type II cytoskeletal 5 OS=Homo sapiens GN=KRT5 PE=1 SV=3	K2C5_HUMAN	swissprot_2012.fasta	62379.6	100.0%	8	8	8	0.0570%	17.8%	YEDEINKR	K	T	99.3%	31.4	27.2	31.4	2.68	0	1	0	0	2	1066.52			16202.5	258	265	Empty	false	K22E_HUMANK2C6A_HUMANK2C6C_HUMANK2C1_HUMAN
Exp1_01	Keratin type II cytoskeletal 5 OS=Homo sapiens GN=KRT5 PE=1 SV=3	K2C5_HUMAN	swissprot_2012.fasta	62379.6	100.0%	8	8	8	0.0570%	17.8%	YEELQQTAGR	K	H	99.7%	68.7	28.6	54.4	5.43	0	1	0	0	2	1194.58			16788.3	365	374	Empty	true
Exp1_01	Platelet glycoprotein IX OS=Homo sapiens GN=GP9 PE=1 SV=3	GPIX_HUMAN	swissprot_2012.fasta	19046.3	99.8%	2	2	2	0.0143%	12.4%	GHGLTALPALPAR	R	T	97.6%	19.9	25.1	5.64	1.96	0	0	1	0	2	1273.74			9308.84	40	52	Empty	true
Exp1_01	Platelet glycoprotein IX OS=Homo sapiens GN=GP9 PE=1 SV=3	GPIX_HUMAN	swissprot_2012.fasta	19046.3	99.8%	2	2	2	0.0143%	12.4%	TPEALLQVR	R	C	99.7%	47.0	25.0	47.0	2.44	0	1	0	0	2	1026.59			10310.2	104	112	Empty	true
Exp1_01	Keratin type I cytoskeletal 17 OS=Homo sapiens GN=KRT17 PE=1 SV=2	K1C17_HUMAN	swissprot_2012.fasta	48106.7	99.8%	2	2	2	0.0143%	17.1%	ASLEGNLAETENR	K	Y	99.7%	85.6	28.8	72.9	3.01	0	1	0	0	2	1403.68			4998.24	322	334	Empty	true
Exp1_01	Keratin type I cytoskeletal 17 OS=Homo sapiens GN=KRT17 PE=1 SV=2	K1C17_HUMAN	swissprot_2012.fasta	48106.7	99.8%	2	2	2	0.0143%	17.1%	ATMQNLNDR	K	L	99.7%	43.8	28.1	16.0	1.60	0	1	0	0	2	1062.5			4353.47	86	94	Empty	true
Exp1_01	Keratin type I cytoskeletal 17 OS=Homo sapiens GN=KRT17 PE=1 SV=2	K1C17_HUMAN	swissprot_2012.fasta	48106.7	99.8%	2	2	2	0.0143%	17.1%	EVATNSELVQSGK	R	S	99.7%	91.4	30.3	77.5	4.57	0	1	0	0	2	1361.69			13711.5	285	297	Empty	false	K1C14_HUMAN
Exp1_01	Keratin type I cytoskeletal 17 OS=Homo sapiens GN=KRT17 PE=1 SV=2	K1C17_HUMAN	swissprot_2012.fasta	48106.7	99.8%	2	2	2	0.0143%	17.1%	LASYLDK	R	V	99.7%	46.7	25.0	36.0	0.000	0	1	0	0	2	8094404			60751.9	95	101	Empty	false	K1C10_HUMANK1C14_HUMANK1C16_HUMANK1C9_HUMAN
Exp1_01	Keratin type I cytoskeletal 17 OS=Homo sapiens GN=KRT17 PE=1 SV=2	K1C17_HUMAN	swissprot_2012.fasta	48106.7	99.8%	2	2	2	0.0143%	17.1%	LASYLDKVR	R	A	99.7%	49.2	25.3	34.8	2.54	0	1	0	0	2	1064.61			49147.2	95	103	Empty	false	K1C10_HUMANK1C14_HUMANK1C16_HUMAN
Exp1_01	Keratin type I cytoskeletal 17 OS=Homo sapiens GN=KRT17 PE=1 SV=2	K1C17_HUMAN	swissprot_2012.fasta	48106.7	99.8%	2	2	2	0.0143%	17.1%	LEQEIATYR	R	R	99.7%	59.5	28.1	40.5	2.27	0	1	0	0	2	1122.58			10902.3	377	385	Empty	false	K1C14_HUMANK1C16_HUMANK1C13_HUMAN
Exp1_01	Keratin type I cytoskeletal 17 OS=Homo sapiens GN=KRT17 PE=1 SV=2	K1C17_HUMAN	swissprot_2012.fasta	48106.7	99.8%	2	2	2	0.0143%	17.1%	NHEEEMNALR	K	G	99.4%	29.9	25.0	29.9	1.89	0	1	0	0	2	1242.55			22177.6	221	230	Empty	false	K1C14_HUMAN
Exp1_01	Keratin type I cytoskeletal 17 OS=Homo sapiens GN=KRT17 PE=1 SV=2	K1C17_HUMAN	swissprot_2012.fasta	48106.7	99.8%	2	2	2	0.0143%	17.1%	TRLEQEIATYR	K	R	99.5%	31.4	28.7	12.7	2.80	0	0	1	0	2	1379.73			17750.5	375	385	Empty	false	K1C14_HUMANK1C16_HUMANK1C13_HUMAN
Exp1_01	Keratin type I cytoskeletal 17 OS=Homo sapiens GN=KRT17 PE=1 SV=2	K1C17_HUMAN	swissprot_2012.fasta	48106.7	99.8%	2	2	2	0.0143%	17.1%	VLDELTLAR	R	A	99.7%	53.4	26.2	33.0	1.59	0	1	0	0	2	1029.59			80102.3	193	201	Empty	false	K1C14_HUMANK1C16_HUMAN
Exp1_01	Cartilage oligomeric matrix protein OS=Homo sapiens GN=COMP PE=1 SV=2	COMP_HUMAN	swissprot_2012.fasta	82858	100.0%	4	5	5	0.0356%	8.85%	AVAEPGIQLK	R	A	98.1%	37.7	25.0	0.000	0.000	0	1	0	0	2	1025.6			10585.4	629	638	Empty	false	TSP4_HUMAN
Exp1_01	Cartilage oligomeric matrix protein OS=Homo sapiens GN=COMP PE=1 SV=2	COMP_HUMAN	swissprot_2012.fasta	82858	100.0%	4	5	5	0.0356%	8.85%	ELQETNAALQDVR	R	E	99.7%	79.6	29.8	64.3	4.40	0	1	0	0	2	1486.75			7785.84	37	49	Empty	true
Exp1_01	Cartilage oligomeric matrix protein OS=Homo sapiens GN=COMP PE=1 SV=2	COMP_HUMAN	swissprot_2012.fasta	82858	100.0%	4	5	5	0.0356%	8.85%	FYVVMWK	S	Q	96.4%	27.9	28.9	27.9	1.24	0	1	0	0	1	9725011			5580.24	609	615	Empty	false	TSP1_HUMANTSP4_HUMAN
Exp1_01	Cartilage oligomeric matrix protein OS=Homo sapiens GN=COMP PE=1 SV=2	COMP_HUMAN	swissprot_2012.fasta	82858	100.0%	4	5	5	0.0356%	8.85%	NALWHTGDTESQVR	R	L	99.7%	69.0	29.0	69.0	4.96	0	1	1	0	2	1613.77			170004	652	665	Empty	true
Exp1_01	Cartilage oligomeric matrix protein OS=Homo sapiens GN=COMP PE=1 SV=2	COMP_HUMAN	swissprot_2012.fasta	82858	100.0%	4	5	5	0.0356%	8.85%	QMEQTYWQANPFR	K	A	99.7%	57.0	27.2	57.0	2.62	0	1	0	0	2	1698.77			2916.55	616	628	Empty	true
Exp1_01	Cartilage oligomeric matrix protein OS=Homo sapiens GN=COMP PE=1 SV=2	COMP_HUMAN	swissprot_2012.fasta	82858	100.0%	4	5	5	0.0356%	8.85%	SSTGPGEQLR	K	N	99.7%	39.0	27.8	24.0	4.14	0	1	0	0	2	1031.51			46459.9	642	651	Empty	true
Exp1_01	Haptoglobin OS=Homo sapiens GN=HP PE=1 SV=1	HPT_HUMAN	swissprot_2012.fasta	45204.9	100.0%	16	19	19	0.135%	29.6%	HYEGSTVPEK	R	K	99.7%	41.1	27.2	25.0	1.85	0	1	0	0	2	1146.54			5509.59	312	321	Empty	true
Exp1_01	Haptoglobin OS=Homo sapiens GN=HP PE=1 SV=1	HPT_HUMAN	swissprot_2012.fasta	45204.9	100.0%	16	19	19	0.135%	29.6%	HYEGSTVPEKK	R	T	99.7%	51.3	29.7	35.1	3.03	0	1	0	0	2	1274.64			4821.97	312	322	Empty	true
Exp1_01	Haptoglobin OS=Homo sapiens GN=HP PE=1 SV=1	HPT_HUMAN	swissprot_2012.fasta	45204.9	100.0%	16	19	19	0.135%	29.6%	ILGGHLDAK	R	G	99.7%	41.1	25.0	23.6	3.62	0	1	0	0	2	9235311			43881.8	162	170	Empty	true	HPTR_HUMAN
Exp1_01	Haptoglobin OS=Homo sapiens GN=HP PE=1 SV=1	HPT_HUMAN	swissprot_2012.fasta	45204.9	100.0%	16	19	19	0.135%	29.6%	ILGGHLDAKGSFPWQAK	R	M	99.7%	49.1	27.7	49.1	0.000	0	0	1	0	2	1824.98			6134.54	162	178	Empty	true	HPTR_HUMAN
Exp1_01	Haptoglobin OS=Homo sapiens GN=HP PE=1 SV=1	HPT_HUMAN	swissprot_2012.fasta	45204.9	100.0%	16	19	19	0.135%	29.6%	LRTEGDGVYTLNDK	K	K	99.7%	64.9	29.4	52.8	2.74	0	1	0	0	2	1580.79			3562.11	58	71	Empty	true	HPTR_HUMAN
Exp1_01	Haptoglobin OS=Homo sapiens GN=HP PE=1 SV=1	HPT_HUMAN	swissprot_2012.fasta	45204.9	100.0%	16	19	19	0.135%	29.6%	LRTEGDGVYTLNNEK	K	Q	99.7%	79.2	29.5	65.5	4.57	0	1	1	1	2	1708.85			49474.9	117	131	Empty	true
Exp1_01	Haptoglobin OS=Homo sapiens GN=HP PE=1 SV=1	HPT_HUMAN	swissprot_2012.fasta	45204.9	100.0%	16	19	19	0.135%	29.6%	NPANPVQR	K	I	99.7%	40.7	25.1	40.7	1.60	0	1	0	0	2	8954744			33657.4	154	161	Empty	true	HPTR_HUMAN
Exp1_01	Haptoglobin OS=Homo sapiens GN=HP PE=1 SV=1	HPT_HUMAN	swissprot_2012.fasta	45204.9	100.0%	16	19	19	0.135%	29.6%	QLVEIEK	K	V	99.2%	44.8	28.6	15.8	0.000	0	1	0	0	2	8584932			39983.1	229	235	Empty	true	HPTR_HUMAN
Exp1_01	Haptoglobin OS=Homo sapiens GN=HP PE=1 SV=1	HPT_HUMAN	swissprot_2012.fasta	45204.9	100.0%	16	19	19	0.135%	29.6%	SCAVAEYGVYVK	K	V	99.7%	27.7	27.7	27.7	5.39	0	1	0	0	2	1346.63			4993.97	380	391	Empty	true	HPTR_HUMAN
Exp1_01	Haptoglobin OS=Homo sapiens GN=HP PE=1 SV=1	HPT_HUMAN	swissprot_2012.fasta	45204.9	100.0%	16	19	19	0.135%	29.6%	TEGDGVYTLNDK	R	K	99.7%	54.8	26.8	54.8	2.30	0	1	0	0	2	1311.61			7094.87	60	71	Empty	true	HPTR_HUMAN
Exp1_01	Haptoglobin OS=Homo sapiens GN=HP PE=1 SV=1	HPT_HUMAN	swissprot_2012.fasta	45204.9	100.0%	16	19	19	0.135%	29.6%	TEGDGVYTLNNEK	R	Q	99.7%	53.7	27.3	53.7	0.000	0	3	1	0	2	1439.66			29985	119	131	Empty	true
Exp1_01	Haptoglobin OS=Homo sapiens GN=HP PE=1 SV=1	HPT_HUMAN	swissprot_2012.fasta	45204.9	100.0%	16	19	19	0.135%	29.6%	VGYVSGWGR	R	N	99.7%	42.4	25.8	42.4	1.44	0	1	0	0	2	9804948			15055.5	278	286	Empty	true
Exp1_01	Haptoglobin OS=Homo sapiens GN=HP PE=1 SV=1	HPT_HUMAN	swissprot_2012.fasta	45204.9	100.0%	16	19	19	0.135%	29.6%	VTSIQDWVQK	K	T	99.7%	70.1	29.7	58.8	2.02	0	1	0	0	2	1203.64			28654.4	392	401	Empty	true
Exp1_01	Haptoglobin OS=Homo sapiens GN=HP PE=1 SV=1	HPT_HUMAN	swissprot_2012.fasta	45204.9	100.0%	16	19	19	0.135%	29.6%	VVLHPNYSQVDIGLIK	K	L	99.7%	59.1	25.0	43.5	1.92	0	0	1	0	2	1795.01			23696.9	236	251	Empty	true
Exp1_01	Keratin type I cytoskeletal 13 OS=Homo sapiens GN=KRT13 PE=1 SV=4	K1C13_HUMAN	swissprot_2012.fasta	49589.3	100.0%	3	3	3	0.0214%	13.8%	ALEEANADLEVK	R	I	99.7%	84.4	29.2	60.6	3.05	0	1	0	0	2	1301.66			6050.29	124	135	Empty	false	K1C14_HUMANK1C16_HUMAN
Exp1_01	Keratin type I cytoskeletal 13 OS=Homo sapiens GN=KRT13 PE=1 SV=4	K1C13_HUMAN	swissprot_2012.fasta	49589.3	100.0%	3	3	3	0.0214%	13.8%	EQYEAMAER	R	N	99.1%	40.7	25.0	27.2	0.000	0	1	0	0	2	1126.48			7334.18	279	287	Empty	true
Exp1_01	Keratin type I cytoskeletal 13 OS=Homo sapiens GN=KRT13 PE=1 SV=4	K1C13_HUMAN	swissprot_2012.fasta	49589.3	100.0%	3	3	3	0.0214%	13.8%	ITMQNLNDR	K	L	99.7%	46.9	29.1	0.000	1.39	0	1	0	0	2	1104.55			7673.46	106	114	Empty	true
Exp1_01	Keratin type I cytoskeletal 13 OS=Homo sapiens GN=KRT13 PE=1 SV=4	K1C13_HUMAN	swissprot_2012.fasta	49589.3	100.0%	3	3	3	0.0214%	13.8%	LEQEIATYR	R	S	99.7%	59.5	28.1	40.5	2.27	0	1	0	0	2	1122.58			10902.3	398	406	Empty	false	K1C17_HUMANK1C14_HUMANK1C16_HUMAN
Exp1_01	Keratin type I cytoskeletal 13 OS=Homo sapiens GN=KRT13 PE=1 SV=4	K1C13_HUMAN	swissprot_2012.fasta	49589.3	100.0%	3	3	3	0.0214%	13.8%	LKYENELALR	R	Q	99.7%	47.7	27.6	28.7	0.000	0	0	1	0	2	1248.69			11314.6	192	201	Empty	true
Exp1_01	Keratin type I cytoskeletal 13 OS=Homo sapiens GN=KRT13 PE=1 SV=4	K1C13_HUMAN	swissprot_2012.fasta	49589.3	100.0%	3	3	3	0.0214%	13.8%	QSVEADINGLR	R	R	99.7%	55.7	30.0	55.7	2.00	0	2	0	0	2	1201.62			25562	202	212	Empty	false	K1C10_HUMAN
Exp1_01	Keratin type I cytoskeletal 13 OS=Homo sapiens GN=KRT13 PE=1 SV=4	K1C13_HUMAN	swissprot_2012.fasta	49589.3	100.0%	3	3	3	0.0214%	13.8%	QSVEADINGLRR	R	V	99.4%	33.5	29.9	1.37	1.18	0	0	1	0	2	1358.7			61020.7	202	213	Empty	false	K1C10_HUMAN
Exp1_01	Keratin type I cytoskeletal 13 OS=Homo sapiens GN=KRT13 PE=1 SV=4	K1C13_HUMAN	swissprot_2012.fasta	49589.3	100.0%	3	3	3	0.0214%	13.8%	TRLEQEIATYR	K	S	99.5%	31.4	28.7	12.7	2.80	0	0	1	0	2	1379.73			17750.5	396	406	Empty	false	K1C17_HUMANK1C14_HUMANK1C16_HUMAN
Exp1_01	Serum paraoxonase/arylesterase 1 OS=Homo sapiens GN=PON1 PE=1 SV=3	PON1_HUMAN	swissprot_2012.fasta	39732.4	100.0%	4	6	6	0.0428%	16.3%	ILLMDLNEEDPTVLELGITGSK	K	F	99.7%	107	29.0	94.4	8.32	0	1	1	0	2	2400.26			31971.9	85	106	Empty	true
Exp1_01	Serum paraoxonase/arylesterase 1 OS=Homo sapiens GN=PON1 PE=1 SV=3	PON1_HUMAN	swissprot_2012.fasta	39732.4	100.0%	4	6	6	0.0428%	16.3%	IQNILTEEPK	R	V	99.7%	58.7	27.7	47.0	0.000	0	1	0	0	2	1184.65			24711.4	307	316	Empty	true
Exp1_01	Serum paraoxonase/arylesterase 1 OS=Homo sapiens GN=PON1 PE=1 SV=3	PON1_HUMAN	swissprot_2012.fasta	39732.4	100.0%	4	6	6	0.0428%	16.3%	LIALTLLGMGLALFR	K	N	99.7%	85.7	25.0	71.3	4.96	0	1	1	0	2	1601.98			10393.1	4	18	Empty	true
Exp1_01	Serum paraoxonase/arylesterase 1 OS=Homo sapiens GN=PON1 PE=1 SV=3	PON1_HUMAN	swissprot_2012.fasta	39732.4	100.0%	4	6	6	0.0428%	16.3%	YVYIAELLAHK	K	I	99.7%	50.5	26.5	38.2	3.96	0	0	1	0	2	1319.74			44976.3	234	244	Empty	true
Exp1_01	Fermitin family homolog 3 OS=Homo sapiens GN=FERMT3 PE=1 SV=1	URP2_HUMAN	swissprot_2012.fasta	75954.9	100.0%	8	8	8	0.0570%	13.5%	AGDALWLR	K	F	99.7%	73.5	28.6	35.6	0.000	0	1	0	0	2	9014891			19583.2	243	250	Empty	true
Exp1_01	Fermitin family homolog 3 OS=Homo sapiens GN=FERMT3 PE=1 SV=1	URP2_HUMAN	swissprot_2012.fasta	75954.9	100.0%	8	8	8	0.0570%	13.5%	HPEELSLLR	R	A	99.1%	30.0	26.7	30.0	1.59	0	1	0	0	2	1093.6			6221.17	135	143	Empty	true
Exp1_01	Fermitin family homolog 3 OS=Homo sapiens GN=FERMT3 PE=1 SV=1	URP2_HUMAN	swissprot_2012.fasta	75954.9	100.0%	8	8	8	0.0570%	13.5%	IDLAVGDVVK	R	T	99.7%	48.5	25.9	21.3	2.12	0	1	0	0	2	1028.6			8179.68	581	590	Empty	true
Exp1_01	Fermitin family homolog 3 OS=Homo sapiens GN=FERMT3 PE=1 SV=1	URP2_HUMAN	swissprot_2012.fasta	75954.9	100.0%	8	8	8	0.0570%	13.5%	KDEILGIANNR	R	L	99.5%	31.6	29.0	16.5	1.26	0	0	1	0	2	1242.68			2398.55	567	577	Empty	true
Exp1_01	Fermitin family homolog 3 OS=Homo sapiens GN=FERMT3 PE=1 SV=1	URP2_HUMAN	swissprot_2012.fasta	75954.9	100.0%	8	8	8	0.0570%	13.5%	LTQLYEQAR	R	W	99.7%	58.1	28.4	44.3	2.85	0	1	0	0	2	1121.6			7161.16	268	276	Empty	true
Exp1_01	Fermitin family homolog 3 OS=Homo sapiens GN=FERMT3 PE=1 SV=1	URP2_HUMAN	swissprot_2012.fasta	75954.9	100.0%	8	8	8	0.0570%	13.5%	TASGDYIDSSWELR	K	V	99.7%	105	27.6	89.2	10.1	0	1	0	0	2	1599.73			6859.04	6	19	Empty	true
Exp1_01	Fermitin family homolog 3 OS=Homo sapiens GN=FERMT3 PE=1 SV=1	URP2_HUMAN	swissprot_2012.fasta	75954.9	100.0%	8	8	8	0.0570%	13.5%	VFVGEEDPEAESVTLR	R	V	99.7%	78.4	29.8	66.6	3.96	0	1	0	0	2	1776.87			3693.69	20	35	Empty	true
Exp1_01	Fermitin family homolog 3 OS=Homo sapiens GN=FERMT3 PE=1 SV=1	URP2_HUMAN	swissprot_2012.fasta	75954.9	100.0%	8	8	8	0.0570%	13.5%	VTGESHIGGVLLK	R	I	99.7%	50.9	25.0	36.4	5.64	0	1	0	0	2	1309.75			4732.73	36	48	Empty	true
Exp1_01	Vitamin D-binding protein OS=Homo sapiens GN=GC PE=1 SV=1	VTDB_HUMAN	swissprot_2012.fasta	52964.6	100.0%	7	8	8	0.0570%	18.1%	ELPEHTVK	K	L	99.4%	29.5	25.0	18.9	1.25	0	1	0	0	2	9525099			17017.2	277	284	Empty	true
Exp1_01	Vitamin D-binding protein OS=Homo sapiens GN=GC PE=1 SV=1	VTDB_HUMAN	swissprot_2012.fasta	52964.6	100.0%	7	8	8	0.0570%	18.1%	ELSSFIDK	K	G	94.7%	34.4	25.8	22.5	0.000	0	1	0	0	2	9384830			4338.83	395	402	Empty	true
Exp1_01	Vitamin D-binding protein OS=Homo sapiens GN=GC PE=1 SV=1	VTDB_HUMAN	swissprot_2012.fasta	52964.6	100.0%	7	8	8	0.0570%	18.1%	HLSLLTTLSNR	K	V	99.7%	45.5	25.7	45.5	3.13	0	1	0	0	2	1254.72			19456.6	208	218	Empty	true
Exp1_01	Vitamin D-binding protein OS=Homo sapiens GN=GC PE=1 SV=1	VTDB_HUMAN	swissprot_2012.fasta	52964.6	100.0%	7	8	8	0.0570%	18.1%	KFPSGTFEQVSQLVK	R	E	99.0%	28.2	27.8	10.8	1.77	0	0	1	0	2	1694.91			4271.71	51	65	Empty	true
Exp1_01	Vitamin D-binding protein OS=Homo sapiens GN=GC PE=1 SV=1	VTDB_HUMAN	swissprot_2012.fasta	52964.6	100.0%	7	8	8	0.0570%	18.1%	RTHLPEVFLSK	R	V	99.7%	42.2	25.4	42.2	2.03	0	0	1	0	2	1326.75			69201.7	353	363	Empty	true
Exp1_01	Vitamin D-binding protein OS=Homo sapiens GN=GC PE=1 SV=1	VTDB_HUMAN	swissprot_2012.fasta	52964.6	100.0%	7	8	8	0.0570%	18.1%	VMDKYTFELSR	K	R	99.7%	56.5	28.9	39.6	2.52	0	0	1	0	2	1388.69			56539.8	342	352	Empty	true
Exp1_01	Vitamin D-binding protein OS=Homo sapiens GN=GC PE=1 SV=1	VTDB_HUMAN	swissprot_2012.fasta	52964.6	100.0%	7	8	8	0.0570%	18.1%	VPTADLEDVLPLAEDITNILSK	K	C	99.7%	94.8	26.4	94.8	5.29	0	1	1	0	2	2366.27			38594.5	243	264	Empty	true
Exp1_01	Guanine nucleotide-binding protein G(i) subunit alpha-2 OS=Homo sapiens GN=GNAI2 PE=1 SV=3	GNAI2_HUMAN	swissprot_2012.fasta	40452	99.8%	2	2	2	0.0143%	8.17%	AMGNLQIDFADPSR	K	A	99.7%	84.8	29.3	73.4	5.19	0	1	0	0	2	1534.73			6691.71	87	100	Empty	true
Exp1_01	Guanine nucleotide-binding protein G(i) subunit alpha-2 OS=Homo sapiens GN=GNAI2 PE=1 SV=3	GNAI2_HUMAN	swissprot_2012.fasta	40452	99.8%	2	2	2	0.0143%	8.17%	IAQSDYIPTQQDVLR	R	T	99.7%	54.8	29.9	36.3	5.85	0	1	0	0	2	1746.9			5066.24	163	177	Empty	true
Exp1_01	Ig kappa chain V-II region RPMI 6410 OS=Homo sapiens PE=4 SV=1	KV206_HUMAN	swissprot_2012.fasta	14706.7	99.8%	2	2	2	0.0143%	29.3%	FSGSGSGTDFTLK	R	I	99.7%	83.5	27.6	0.000	3.89	0	1	0	0	2	1303.62			237012	87	99	Empty	true
Exp1_01	Ig kappa chain V-II region RPMI 6410 OS=Homo sapiens PE=4 SV=1	KV206_HUMAN	swissprot_2012.fasta	14706.7	99.8%	2	2	2	0.0143%	29.3%	SSQSLVYSDGNTYLNWFQQRPGQSPR	R	R	99.7%	30.0	30.3	30.0	3.89	0	0	1	0	2	3015.43			3228.22	45	70	Empty	true
Exp1_01	Ig kappa chain V-I region HK102 (Fragment) OS=Homo sapiens GN=IGKV1-5 PE=4 SV=1	KV110_HUMAN	swissprot_2012.fasta	12769	100.0%	3	3	3	0.0214%	40.2%	ASQSISSWLAWYQQKPGK	R	A	99.7%	56.7	29.8	46.0	2.37	0	0	1	0	2	2065.05			98162	47	64	Empty	true
Exp1_01	Ig kappa chain V-I region HK102 (Fragment) OS=Homo sapiens GN=IGKV1-5 PE=4 SV=1	KV110_HUMAN	swissprot_2012.fasta	12769	100.0%	3	3	3	0.0214%	40.2%	ASSLESGVPSR	D	F	99.6%	36.0	29.9	16.4	1.74	0	1	0	0	1	1089.55			9178.04	73	83	Empty	true
Exp1_01	Ig kappa chain V-I region HK102 (Fragment) OS=Homo sapiens GN=IGKV1-5 PE=4 SV=1	KV110_HUMAN	swissprot_2012.fasta	12769	100.0%	3	3	3	0.0214%	40.2%	DIQMTQSPSTLSASVGDR	C	V	99.7%	150	29.6	70.9	8.35	0	1	0	0	1	1892.9			12441.8	23	40	Empty	true
Exp1_01	Hemoglobin subunit alpha OS=Homo sapiens GN=HBA1 PE=1 SV=2	HBA_HUMAN	swissprot_2012.fasta	15257.6	100.0%	8	11	11	0.0784%	71.8%	FLASVSTVLTSK	K	Y	99.7%	80.4	25.0	80.4	4.19	0	1	0	0	2	1252.71			26830.3	129	140	Empty	true
Exp1_01	Hemoglobin subunit alpha OS=Homo sapiens GN=HBA1 PE=1 SV=2	HBA_HUMAN	swissprot_2012.fasta	15257.6	100.0%	8	11	11	0.0784%	71.8%	KVADALTNAVAHVDDMPNALSALSDLHAHK	K	L	98.5%	38.7	29.2	27.6	0.000	0	0	0	0	2	3124.58			69781.9	62	91	Empty	true
Exp1_01	Hemoglobin subunit alpha OS=Homo sapiens GN=HBA1 PE=1 SV=2	HBA_HUMAN	swissprot_2012.fasta	15257.6	100.0%	8	11	11	0.0784%	71.8%	LRVDPVNFK	K	L	99.1%	29.6	27.0	16.5	2.72	0	1	0	0	2	1087.63			11350.7	92	100	Empty	true
Exp1_01	Hemoglobin subunit alpha OS=Homo sapiens GN=HBA1 PE=1 SV=2	HBA_HUMAN	swissprot_2012.fasta	15257.6	100.0%	8	11	11	0.0784%	71.8%	MFLSFPTTK	R	T	99.1%	30.6	27.1	30.6	1.92	0	1	0	0	2	1071.55			8020.16	33	41	Empty	true
Exp1_01	Hemoglobin subunit alpha OS=Homo sapiens GN=HBA1 PE=1 SV=2	HBA_HUMAN	swissprot_2012.fasta	15257.6	100.0%	8	11	11	0.0784%	71.8%	TYFPHFDLSHGSAQVK	K	G	99.7%	65.7	30.0	65.7	3.21	0	1	1	0	2	1833.89			30108.6	42	57	Empty	true
Exp1_01	Hemoglobin subunit alpha OS=Homo sapiens GN=HBA1 PE=1 SV=2	HBA_HUMAN	swissprot_2012.fasta	15257.6	100.0%	8	11	11	0.0784%	71.8%	VADALTNAVAHVDDMPNALSALSDLHAHK	K	L	99.7%	57.9	29.6	57.9	1.74	0	0	0	1	2	2996.49			421138	63	91	Empty	true
Exp1_01	Hemoglobin subunit alpha OS=Homo sapiens GN=HBA1 PE=1 SV=2	HBA_HUMAN	swissprot_2012.fasta	15257.6	100.0%	8	11	11	0.0784%	71.8%	VGAHAGEYGAEALER	K	M	99.7%	69.7	28.6	69.7	8.08	0	1	1	0	2	1529.73			54435.3	18	32	Empty	true
Exp1_01	Hemoglobin subunit alpha OS=Homo sapiens GN=HBA1 PE=1 SV=2	HBA_HUMAN	swissprot_2012.fasta	15257.6	100.0%	8	11	11	0.0784%	71.8%	VLSPADKTNVK	M	A	99.7%	42.8	28.7	31.5	1.72	0	1	0	0	1	1171.67			19529.1	2	12	Empty	true
Exp1_01	Coagulation factor IX OS=Homo sapiens GN=F9 PE=1 SV=2	FA9_HUMAN	swissprot_2012.fasta	51777.6	100.0%	4	4	4	0.0285%	11.3%	FGSGYVSGWGR	K	V	99.7%	38.8	26.5	38.8	5.92	0	1	0	0	2	1172.55			34742.3	348	358	Empty	true
Exp1_01	Coagulation factor IX OS=Homo sapiens GN=F9 PE=1 SV=2	FA9_HUMAN	swissprot_2012.fasta	51777.6	100.0%	4	4	4	0.0285%	11.3%	IIPHHNYNAAINK	R	Y	99.7%	33.1	28.7	21.0	2.44	0	0	1	0	2	1504.8			57481.5	299	311	Empty	true
Exp1_01	Coagulation factor IX OS=Homo sapiens GN=F9 PE=1 SV=2	FA9_HUMAN	swissprot_2012.fasta	51777.6	100.0%	4	4	4	0.0285%	11.3%	ITVVAGEHNIEETEHTEQK	K	R	99.7%	48.0	30.2	48.0	1.82	0	0	1	0	2	2164.05			8468.07	275	293	Empty	true
Exp1_01	Coagulation factor IX OS=Homo sapiens GN=F9 PE=1 SV=2	FA9_HUMAN	swissprot_2012.fasta	51777.6	100.0%	4	4	4	0.0285%	11.3%	SALVLQYLR	R	V	99.7%	72.2	25.0	47.3	2.82	0	1	0	0	2	1062.63			11191.1	365	373	Empty	true
Exp1_01	Alpha-actinin-1 OS=Homo sapiens GN=ACTN1 PE=1 SV=2	ACTN1_HUMAN	swissprot_2012.fasta	103061	100.0%	8	8	8	0.0570%	10.7%	FAIQDISVEETSAK	R	E	99.7%	49.4	29.1	49.4	5.72	0	1	0	0	2	1537.77			10059.8	134	147	Empty	true
Exp1_01	Alpha-actinin-1 OS=Homo sapiens GN=ACTN1 PE=1 SV=2	ACTN1_HUMAN	swissprot_2012.fasta	103061	100.0%	8	8	8	0.0570%	10.7%	HRPELIDYGK	R	L	99.7%	39.3	28.4	19.8	2.00	0	0	1	0	2	1227.65			989604	186	195	Empty	true
Exp1_01	Alpha-actinin-1 OS=Homo sapiens GN=ACTN1 PE=1 SV=2	ACTN1_HUMAN	swissprot_2012.fasta	103061	100.0%	8	8	8	0.0570%	10.7%	HTNYTMEHIR	K	V	99.7%	45.8	26.0	35.7	1.55	0	0	1	0	2	1301.61			22092.9	705	714	Empty	true
Exp1_01	Alpha-actinin-1 OS=Homo sapiens GN=ACTN1 PE=1 SV=2	ACTN1_HUMAN	swissprot_2012.fasta	103061	100.0%	8	8	8	0.0570%	10.7%	KHEAFESDLAAHQDR	K	V	99.7%	42.9	29.2	28.7	1000	0	0	0	1	2	1753.83			17666.8	436	450	Empty	true
Exp1_01	Alpha-actinin-1 OS=Homo sapiens GN=ACTN1 PE=1 SV=2	ACTN1_HUMAN	swissprot_2012.fasta	103061	100.0%	8	8	8	0.0570%	10.7%	LDHLAEK	R	F	96.2%	23.9	25.0	11.5	1.24	0	1	0	0	2	8254466			3414.94	392	398	Empty	true
Exp1_01	Alpha-actinin-1 OS=Homo sapiens GN=ACTN1 PE=1 SV=2	ACTN1_HUMAN	swissprot_2012.fasta	103061	100.0%	8	8	8	0.0570%	10.7%	MLDAEDIVGTARPDEK	K	A	99.7%	51.6	29.6	34.5	2.80	0	0	1	0	2	1759.85			20526.3	221	236	Empty	true
Exp1_01	Alpha-actinin-1 OS=Homo sapiens GN=ACTN1 PE=1 SV=2	ACTN1_HUMAN	swissprot_2012.fasta	103061	100.0%	8	8	8	0.0570%	10.7%	RDQALTEEHAR	R	Q	99.7%	58.2	27.9	36.9	2.18	0	0	1	0	2	1325.66			9238.23	614	624	Empty	true
Exp1_01	Alpha-actinin-1 OS=Homo sapiens GN=ACTN1 PE=1 SV=2	ACTN1_HUMAN	swissprot_2012.fasta	103061	100.0%	8	8	8	0.0570%	10.7%	TINEVENQILTR	R	D	99.7%	55.5	29.4	55.5	1.89	0	1	0	0	2	1429.76			9329.72	727	738	Empty	true
Exp1_01	Angiotensinogen OS=Homo sapiens GN=AGT PE=1 SV=1	ANGT_HUMAN	swissprot_2012.fasta	53154.8	100.0%	5	5	5	0.0356%	13.6%	ADSQAQLLLSTVVGVFTAPGLHLK	R	Q	99.7%	75.2	25.0	75.2	3.66	0	0	1	0	2	2465.38			39200.6	197	220	Empty	true
Exp1_01	Angiotensinogen OS=Homo sapiens GN=AGT PE=1 SV=1	ANGT_HUMAN	swissprot_2012.fasta	53154.8	100.0%	5	5	5	0.0356%	13.6%	ALQDQLVLVAAK	K	L	99.7%	79.7	25.0	59.2	4.80	0	1	0	0	2	1268.76			26386.3	83	94	Empty	true
Exp1_01	Angiotensinogen OS=Homo sapiens GN=AGT PE=1 SV=1	ANGT_HUMAN	swissprot_2012.fasta	53154.8	100.0%	5	5	5	0.0356%	13.6%	FMQAVTGWK	R	T	99.7%	55.7	26.7	44.8	3.59	0	1	0	0	2	1067.53			8764.23	254	262	Empty	true
Exp1_01	Angiotensinogen OS=Homo sapiens GN=AGT PE=1 SV=1	ANGT_HUMAN	swissprot_2012.fasta	53154.8	100.0%	5	5	5	0.0356%	13.6%	LDTEDKLR	K	A	99.7%	59.8	29.9	31.2	1.80	0	1	0	0	2	9895264			12961.2	95	102	Empty	true
Exp1_01	Angiotensinogen OS=Homo sapiens GN=AGT PE=1 SV=1	ANGT_HUMAN	swissprot_2012.fasta	53154.8	100.0%	5	5	5	0.0356%	13.6%	SLDFTELDVAAEK	R	I	99.7%	93.3	29.0	93.3	2.23	0	1	0	0	2	1437.71			4275.72	238	250	Empty	true
Exp1_01	Histidine-rich glycoprotein OS=Homo sapiens GN=HRG PE=1 SV=1	HRG_HUMAN	swissprot_2012.fasta	59576.6	100.0%	7	7	7	0.0499%	17.7%	ADLFYDVEALDLESPK	R	N	99.7%	60.0	30.0	44.6	4.25	0	1	0	0	2	1824.89			1256.31	220	235	Empty	true
Exp1_01	Histidine-rich glycoprotein OS=Homo sapiens GN=HRG PE=1 SV=1	HRG_HUMAN	swissprot_2012.fasta	59576.6	100.0%	7	7	7	0.0499%	17.7%	DGYLFQLLR	R	I	96.5%	36.0	25.7	25.2	0.000	0	1	0	0	2	1124.61			13212.7	44	52	Empty	true
Exp1_01	Histidine-rich glycoprotein OS=Homo sapiens GN=HRG PE=1 SV=1	HRG_HUMAN	swissprot_2012.fasta	59576.6	100.0%	7	7	7	0.0499%	17.7%	GGEGTGYFVDFSVR	R	N	99.7%	84.3	27.7	73.3	2.42	0	1	0	0	2	1490.69			8696.72	188	201	Empty	true
Exp1_01	Histidine-rich glycoprotein OS=Homo sapiens GN=HRG PE=1 SV=1	HRG_HUMAN	swissprot_2012.fasta	59576.6	100.0%	7	7	7	0.0499%	17.7%	KGEVLPLPEANFPSFPLPHHK	R	H	99.7%	36.2	26.7	36.2	0.959	0	0	0	1	2	2354.27			48450.1	466	486	Empty	true
Exp1_01	Histidine-rich glycoprotein OS=Homo sapiens GN=HRG PE=1 SV=1	HRG_HUMAN	swissprot_2012.fasta	59576.6	100.0%	7	7	7	0.0499%	17.7%	QIGSVYR	R	L	99.2%	28.9	25.2	16.4	1.55	0	1	0	0	2	8224468			11179.6	454	460	Empty	true
Exp1_01	Histidine-rich glycoprotein OS=Homo sapiens GN=HRG PE=1 SV=1	HRG_HUMAN	swissprot_2012.fasta	59576.6	100.0%	7	7	7	0.0499%	17.7%	SSTTKPPFKPHGSR	R	D	99.7%	44.9	28.6	34.6	3.14	0	0	1	0	2	1526.81			3716.03	271	284	Empty	true
Exp1_01	Histidine-rich glycoprotein OS=Homo sapiens GN=HRG PE=1 SV=1	HRG_HUMAN	swissprot_2012.fasta	59576.6	100.0%	7	7	7	0.0499%	17.7%	YKEENDDFASFR	K	V	99.7%	39.9	25.5	39.9	2.55	0	1	0	0	2	1520.67			2645.14	165	176	Empty	true
Exp1_01	Complement factor B OS=Homo sapiens GN=CFB PE=1 SV=2	CFAB_HUMAN	swissprot_2012.fasta	85533.2	100.0%	16	18	18	0.128%	23.2%	ALFVSEEEKK	K	L	99.7%	57.0	28.3	38.1	2.33	0	1	0	0	2	1179.63			117704	630	639	Empty	true
Exp1_01	Complement factor B OS=Homo sapiens GN=CFB PE=1 SV=2	CFAB_HUMAN	swissprot_2012.fasta	85533.2	100.0%	16	18	18	0.128%	23.2%	DAQYAPGYDK	R	V	99.7%	36.8	25.1	16.4	1.41	0	1	0	0	2	1127.5			3534.29	659	668	Empty	true
Exp1_01	Complement factor B OS=Homo sapiens GN=CFB PE=1 SV=2	CFAB_HUMAN	swissprot_2012.fasta	85533.2	100.0%	16	18	18	0.128%	23.2%	DFHINLFQVLPWLK	R	E	99.7%	48.8	26.4	48.8	3.28	0	1	1	0	2	1769.97			124563	740	753	Empty	true
Exp1_01	Complement factor B OS=Homo sapiens GN=CFB PE=1 SV=2	CFAB_HUMAN	swissprot_2012.fasta	85533.2	100.0%	16	18	18	0.128%	23.2%	DLLYIGK	R	D	96.0%	34.7	25.0	13.0	0.000	0	1	0	0	2	8214769			28547.2	407	413	Empty	true
Exp1_01	Complement factor B OS=Homo sapiens GN=CFB PE=1 SV=2	CFAB_HUMAN	swissprot_2012.fasta	85533.2	100.0%	16	18	18	0.128%	23.2%	EAGIPEFYDYDVALIK	K	L	99.7%	58.5	29.1	47.7	5.43	0	1	0	0	2	1842.92			50171.4	566	581	Empty	true
Exp1_01	Complement factor B OS=Homo sapiens GN=CFB PE=1 SV=2	CFAB_HUMAN	swissprot_2012.fasta	85533.2	100.0%	16	18	18	0.128%	23.2%	EELLPAQDIK	K	A	99.7%	68.0	25.9	51.6	1.41	0	1	0	0	2	1155.63			77248.7	620	629	Empty	true
Exp1_01	Complement factor B OS=Homo sapiens GN=CFB PE=1 SV=2	CFAB_HUMAN	swissprot_2012.fasta	85533.2	100.0%	16	18	18	0.128%	23.2%	EKLQDEDLGFL	K	-	99.7%	48.0	29.4	48.0	4.77	0	1	0	0	2	1306.65			19293.5	754	764	Empty	true
Exp1_01	Complement factor B OS=Homo sapiens GN=CFB PE=1 SV=2	CFAB_HUMAN	swissprot_2012.fasta	85533.2	100.0%	16	18	18	0.128%	23.2%	GDSGGPLIVHK	R	R	99.7%	37.8	26.1	19.2	2.72	0	1	0	0	2	1079.58			17342.6	697	707	Empty	true
Exp1_01	Complement factor B OS=Homo sapiens GN=CFB PE=1 SV=2	CFAB_HUMAN	swissprot_2012.fasta	85533.2	100.0%	16	18	18	0.128%	23.2%	GDSGGPLIVHKR	R	S	99.7%	53.8	26.4	40.3	3.42	0	1	0	0	2	1235.69			12695.9	697	708	Empty	true
Exp1_01	Complement factor B OS=Homo sapiens GN=CFB PE=1 SV=2	CFAB_HUMAN	swissprot_2012.fasta	85533.2	100.0%	16	18	18	0.128%	23.2%	HVIILMTDGLHNMGGDPITVIDEIRDLLYIGK	R	D	99.7%	43.4	25.0	43.4	3.70	0	0	0	1	2	3561.88			7973.54	382	413	Empty	true
Exp1_01	Complement factor B OS=Homo sapiens GN=CFB PE=1 SV=2	CFAB_HUMAN	swissprot_2012.fasta	85533.2	100.0%	16	18	18	0.128%	23.2%	ISVIRPSK	K	G	97.1%	36.0	25.0	21.2	0.000	0	1	0	0	2	8995673			20835.6	499	506	Empty	true
Exp1_01	Complement factor B OS=Homo sapiens GN=CFB PE=1 SV=2	CFAB_HUMAN	swissprot_2012.fasta	85533.2	100.0%	16	18	18	0.128%	23.2%	KDNEQHVFK	K	V	98.9%	44.5	29.6	28.8	0.000	0	1	0	0	2	1144.57			9210	446	454	Empty	true
Exp1_01	Complement factor B OS=Homo sapiens GN=CFB PE=1 SV=2	CFAB_HUMAN	swissprot_2012.fasta	85533.2	100.0%	16	18	18	0.128%	23.2%	VASYGVKPR	K	Y	99.7%	64.4	26.7	53.9	2.62	0	1	0	0	2	9765574			86188.8	300	308	Empty	true
Exp1_01	Complement factor B OS=Homo sapiens GN=CFB PE=1 SV=2	CFAB_HUMAN	swissprot_2012.fasta	85533.2	100.0%	16	18	18	0.128%	23.2%	VKDISEVVTPR	K	F	99.7%	43.2	28.1	24.9	3.10	0	1	1	0	2	1242.71			39448	669	679	Empty	true
Exp1_01	Complement factor B OS=Homo sapiens GN=CFB PE=1 SV=2	CFAB_HUMAN	swissprot_2012.fasta	85533.2	100.0%	16	18	18	0.128%	23.2%	VSEADSSNADWVTK	K	Q	99.7%	104	27.1	104	5.31	0	1	0	0	2	1508.69			11960.4	324	337	Empty	true
Exp1_01	Complement factor B OS=Homo sapiens GN=CFB PE=1 SV=2	CFAB_HUMAN	swissprot_2012.fasta	85533.2	100.0%	16	18	18	0.128%	23.2%	YGLVTYATYPK	R	I	99.7%	78.4	29.7	66.4	2.85	0	1	0	0	2	1275.66			131582	309	319	Empty	true
Exp1_01	Inter-alpha-trypsin inhibitor heavy chain H1 OS=Homo sapiens GN=ITIH1 PE=1 SV=3	ITIH1_HUMAN	swissprot_2012.fasta	101390	100.0%	18	26	31	0.221%	26.7%	ERGHMLENHVER	R	L	99.7%	47.6	29.6	34.7	1.92	0	0	1	0	2	1506.72			14706.2	553	564	Empty	true
Exp1_01	Inter-alpha-trypsin inhibitor heavy chain H1 OS=Homo sapiens GN=ITIH1 PE=1 SV=3	ITIH1_HUMAN	swissprot_2012.fasta	101390	100.0%	18	26	31	0.221%	26.7%	EVAFDLEIPK	R	T	99.7%	50.7	29.0	37.1	1.68	0	1	0	0	2	1160.62			28101.8	84	93	Empty	true
Exp1_01	Inter-alpha-trypsin inhibitor heavy chain H1 OS=Homo sapiens GN=ITIH1 PE=1 SV=3	ITIH1_HUMAN	swissprot_2012.fasta	101390	100.0%	18	26	31	0.221%	26.7%	FAHYVVTSQVVNTANEAR	R	E	99.7%	111	30.1	111	8.15	0	1	2	0	2	2006.01			130161	66	83	Empty	true
Exp1_01	Inter-alpha-trypsin inhibitor heavy chain H1 OS=Homo sapiens GN=ITIH1 PE=1 SV=3	ITIH1_HUMAN	swissprot_2012.fasta	101390	100.0%	18	26	31	0.221%	26.7%	GFSLDEATNLNGGLLR	R	G	99.7%	71.7	29.9	0.0300	5.09	0	2	0	0	2	1677.84			205096	361	376	Empty	true
Exp1_01	Inter-alpha-trypsin inhibitor heavy chain H1 OS=Homo sapiens GN=ITIH1 PE=1 SV=3	ITIH1_HUMAN	swissprot_2012.fasta	101390	100.0%	18	26	31	0.221%	26.7%	GHMLENHVER	R	L	99.7%	58.7	28.8	46.8	6.77	0	2	1	0	2	1221.58			103278	555	564	Empty	true
Exp1_01	Inter-alpha-trypsin inhibitor heavy chain H1 OS=Homo sapiens GN=ITIH1 PE=1 SV=3	ITIH1_HUMAN	swissprot_2012.fasta	101390	100.0%	18	26	31	0.221%	26.7%	GMADQDGLKPTIDKPSEDSPPLEMLGPR	R	R	99.7%	70.0	30.4	55.9	5.48	0	0	1	1	2	2994.46			35496.8	613	640	Empty	true
Exp1_01	Inter-alpha-trypsin inhibitor heavy chain H1 OS=Homo sapiens GN=ITIH1 PE=1 SV=3	ITIH1_HUMAN	swissprot_2012.fasta	101390	100.0%	18	26	31	0.221%	26.7%	GSLVQASEANLQAAQDFVR	K	G	99.7%	132	30.0	132	7.38	0	1	1	0	2	2004.01			210577	342	360	Empty	true
Exp1_01	Inter-alpha-trypsin inhibitor heavy chain H1 OS=Homo sapiens GN=ITIH1 PE=1 SV=3	ITIH1_HUMAN	swissprot_2012.fasta	101390	100.0%	18	26	31	0.221%	26.7%	ILGDMQPGDYFDLVLFGTR	K	V	99.7%	80.3	30.3	80.3	6.89	0	1	0	0	2	2157.07			23019.6	318	336	Empty	true
Exp1_01	Inter-alpha-trypsin inhibitor heavy chain H1 OS=Homo sapiens GN=ITIH1 PE=1 SV=3	ITIH1_HUMAN	swissprot_2012.fasta	101390	100.0%	18	26	31	0.221%	26.7%	KAAISGENAGLVR	R	A	99.7%	40.9	28.0	29.7	3.12	0	1	0	0	2	1285.72			14138.3	125	137	Empty	true
Exp1_01	Inter-alpha-trypsin inhibitor heavy chain H1 OS=Homo sapiens GN=ITIH1 PE=1 SV=3	ITIH1_HUMAN	swissprot_2012.fasta	101390	100.0%	18	26	31	0.221%	26.7%	LDAQASFLPK	K	E	99.7%	79.0	28.4	59.0	2.04	0	2	0	0	2	1089.59			104831	205	214	Empty	true
Exp1_01	Inter-alpha-trypsin inhibitor heavy chain H1 OS=Homo sapiens GN=ITIH1 PE=1 SV=3	ITIH1_HUMAN	swissprot_2012.fasta	101390	100.0%	18	26	31	0.221%	26.7%	LWAYLTIQELLAK	R	R	99.7%	109	25.0	109	4.12	0	1	0	0	2	1561.9			81289.1	565	577	Empty	true
Exp1_01	Inter-alpha-trypsin inhibitor heavy chain H1 OS=Homo sapiens GN=ITIH1 PE=1 SV=3	ITIH1_HUMAN	swissprot_2012.fasta	101390	100.0%	18	26	31	0.221%	26.7%	NHMQYEIVIK	R	V	99.7%	41.5	30.4	30.8	5.19	0	1	0	0	2	1274.66			60974.2	171	180	Empty	true
Exp1_01	Inter-alpha-trypsin inhibitor heavy chain H1 OS=Homo sapiens GN=ITIH1 PE=1 SV=3	ITIH1_HUMAN	swissprot_2012.fasta	101390	100.0%	18	26	31	0.221%	26.7%	QAVDTAVDGVFIR	R	S	99.7%	99.9	29.4	76.4	3.92	0	1	1	0	2	1390.73			102191	42	54	Empty	true
Exp1_01	Inter-alpha-trypsin inhibitor heavy chain H1 OS=Homo sapiens GN=ITIH1 PE=1 SV=3	ITIH1_HUMAN	swissprot_2012.fasta	101390	100.0%	18	26	31	0.221%	26.7%	QLVHHFEIDVDIFEPQGISK	K	L	99.7%	58.6	29.2	58.6	2.64	0	0	1	1	2	2351.2			63198	185	204	Empty	true
Exp1_01	Inter-alpha-trypsin inhibitor heavy chain H1 OS=Homo sapiens GN=ITIH1 PE=1 SV=3	ITIH1_HUMAN	swissprot_2012.fasta	101390	100.0%	18	26	31	0.221%	26.7%	QYYEGSEIVVAGR	K	I	99.7%	73.3	28.7	73.3	6.26	0	2	0	0	2	1470.72			24758.9	502	514	Empty	true
Exp1_01	Inter-alpha-trypsin inhibitor heavy chain H1 OS=Homo sapiens GN=ITIH1 PE=1 SV=3	ITIH1_HUMAN	swissprot_2012.fasta	101390	100.0%	18	26	31	0.221%	26.7%	RNHMQYEIVIK	K	V	99.7%	49.2	29.6	34.6	0.000	0	0	1	0	2	1430.76			6472.55	170	180	Empty	true
Exp1_01	Inter-alpha-trypsin inhibitor heavy chain H1 OS=Homo sapiens GN=ITIH1 PE=1 SV=3	ITIH1_HUMAN	swissprot_2012.fasta	101390	100.0%	18	26	31	0.221%	26.7%	TMEQFTIHLTVNPQSK	R	V	99.7%	50.8	30.1	40.2	2.68	0	0	2	0	2	1873.95			51292	142	157	Empty	true
Exp1_01	Inter-alpha-trypsin inhibitor heavy chain H1 OS=Homo sapiens GN=ITIH1 PE=1 SV=3	ITIH1_HUMAN	swissprot_2012.fasta	101390	100.0%	18	26	31	0.221%	26.7%	VTFQLTYEEVLKR	K	N	99.7%	46.0	27.9	33.8	2.51	0	0	2	0	2	1625.89			242091	158	170	Empty	true
Exp1_01	Complement C5 OS=Homo sapiens GN=C5 PE=1 SV=4	CO5_HUMAN	swissprot_2012.fasta	188309	100.0%	45	59	64	0.456%	34.1%	ALLVGEHLNIIVTPK	K	S	99.7%	70.4	25.0	70.4	10.6	0	1	1	0	2	1616.97			22858.2	475	489	Empty	true
Exp1_01	Complement C5 OS=Homo sapiens GN=C5 PE=1 SV=4	CO5_HUMAN	swissprot_2012.fasta	188309	100.0%	45	59	64	0.456%	34.1%	ALVEGVDQLFTDYQIK	K	D	99.7%	72.1	28.3	57.0	6.82	0	1	0	0	2	1838.95			10864.6	1441	1456	Empty	true
Exp1_01	Complement C5 OS=Homo sapiens GN=C5 PE=1 SV=4	CO5_HUMAN	swissprot_2012.fasta	188309	100.0%	45	59	64	0.456%	34.1%	ATLLDIYK	K	T	99.7%	34.7	25.0	17.9	3.28	0	1	0	0	2	9365402			4124.51	1579	1586	Empty	true
Exp1_01	Complement C5 OS=Homo sapiens GN=C5 PE=1 SV=4	CO5_HUMAN	swissprot_2012.fasta	188309	100.0%	45	59	64	0.456%	34.1%	DSEITFIK	K	K	99.7%	42.7	25.4	42.7	1.82	0	1	0	0	2	9524987			6840.96	1595	1602	Empty	true
Exp1_01	Complement C5 OS=Homo sapiens GN=C5 PE=1 SV=4	CO5_HUMAN	swissprot_2012.fasta	188309	100.0%	45	59	64	0.456%	34.1%	DSSVPNTGTAR	K	M	99.7%	47.7	28.4	22.2	2.68	0	1	0	0	2	1104.53			18423.8	1236	1246	Empty	true
Exp1_01	Complement C5 OS=Homo sapiens GN=C5 PE=1 SV=4	CO5_HUMAN	swissprot_2012.fasta	188309	100.0%	45	59	64	0.456%	34.1%	EESSSGSSHAVMDISLPTGISANEEDLK	R	A	99.7%	68.6	29.2	55.0	6.85	0	0	1	0	2	2890.33			5521.47	1413	1440	Empty	true
Exp1_01	Complement C5 OS=Homo sapiens GN=C5 PE=1 SV=4	CO5_HUMAN	swissprot_2012.fasta	188309	100.0%	45	59	64	0.456%	34.1%	EGMLSIMSYR	K	N	98.8%	41.5	26.8	41.5	0.000	0	1	0	0	2	1186.56			387666	1051	1060	Empty	true
Exp1_01	Complement C5 OS=Homo sapiens GN=C5 PE=1 SV=4	CO5_HUMAN	swissprot_2012.fasta	188309	100.0%	45	59	64	0.456%	34.1%	EKFSDASYQSINIPVTQNMVPSSR	R	L	99.7%	37.6	30.2	26.2	3.43	0	0	1	0	2	2698.31			7380.73	516	539	Empty	true
Exp1_01	Complement C5 OS=Homo sapiens GN=C5 PE=1 SV=4	CO5_HUMAN	swissprot_2012.fasta	188309	100.0%	45	59	64	0.456%	34.1%	ELSYYSLEDLNNK	K	Y	99.7%	79.1	28.7	68.4	4.35	0	1	1	0	2	1587.75			17137.6	309	321	Empty	true
Exp1_01	Complement C5 OS=Homo sapiens GN=C5 PE=1 SV=4	CO5_HUMAN	swissprot_2012.fasta	188309	100.0%	45	59	64	0.456%	34.1%	ENSLYLTAFTVIGIR	R	K	99.7%	95.1	27.1	95.1	7.33	0	1	0	0	2	1696.93			20354.8	1139	1153	Empty	true
Exp1_01	Complement C5 OS=Homo sapiens GN=C5 PE=1 SV=4	CO5_HUMAN	swissprot_2012.fasta	188309	100.0%	45	59	64	0.456%	34.1%	ESYSGVTLDPR	R	G	99.7%	46.3	28.3	30.0	1.96	0	2	0	0	2	1223.59			22509.1	937	947	Empty	true
Exp1_01	Complement C5 OS=Homo sapiens GN=C5 PE=1 SV=4	CO5_HUMAN	swissprot_2012.fasta	188309	100.0%	45	59	64	0.456%	34.1%	FQNSAILTIQPK	K	Q	99.7%	66.3	26.8	66.3	3.25	0	1	0	0	2	1359.76			1608.1	79	90	Empty	true
Exp1_01	Complement C5 OS=Homo sapiens GN=C5 PE=1 SV=4	CO5_HUMAN	swissprot_2012.fasta	188309	100.0%	45	59	64	0.456%	34.1%	FSDASYQSINIPVTQNMVPSSR	K	L	99.7%	85.5	30.1	74.4	3.96	0	1	0	0	2	2441.18			5153.39	518	539	Empty	true
Exp1_01	Complement C5 OS=Homo sapiens GN=C5 PE=1 SV=4	CO5_HUMAN	swissprot_2012.fasta	188309	100.0%	45	59	64	0.456%	34.1%	FSYSSGHVHLSSENK	K	F	99.7%	66.5	28.7	66.5	4.62	0	1	0	0	2	1678.78			6120.19	64	78	Empty	true
Exp1_01	Complement C5 OS=Homo sapiens GN=C5 PE=1 SV=4	CO5_HUMAN	swissprot_2012.fasta	188309	100.0%	45	59	64	0.456%	34.1%	GEQIQLK	R	G	99.3%	46.2	29.3	4.61	0.000	0	1	0	0	2	8154623			45178.5	836	842	Empty	true
Exp1_01	Complement C5 OS=Homo sapiens GN=C5 PE=1 SV=4	CO5_HUMAN	swissprot_2012.fasta	188309	100.0%	45	59	64	0.456%	34.1%	GGSASTWLTAFALR	K	V	99.7%	55.3	28.0	55.3	4.12	0	1	0	0	2	1437.75			41068.8	1071	1084	Empty	true
Exp1_01	Complement C5 OS=Homo sapiens GN=C5 PE=1 SV=4	CO5_HUMAN	swissprot_2012.fasta	188309	100.0%	45	59	64	0.456%	34.1%	GLLVGEILSAVLSQEGINILTHLPK	K	G	99.7%	79.3	25.0	79.3	7.01	0	0	2	1	2	2614.52			23416	981	1005	Empty	true
Exp1_01	Complement C5 OS=Homo sapiens GN=C5 PE=1 SV=4	CO5_HUMAN	swissprot_2012.fasta	188309	100.0%	45	59	64	0.456%	34.1%	GRQYLIMGK	K	E	97.5%	25.7	25.5	12.8	1.52	0	1	0	0	2	1065.59			11434.7	1614	1622	Empty	true
Exp1_01	Complement C5 OS=Homo sapiens GN=C5 PE=1 SV=4	CO5_HUMAN	swissprot_2012.fasta	188309	100.0%	45	59	64	0.456%	34.1%	GYGNSDYKR	R	I	99.7%	44.3	25.0	44.3	2.55	0	2	0	0	2	1059.49			23192.2	1393	1401	Empty	true
Exp1_01	Complement C5 OS=Homo sapiens GN=C5 PE=1 SV=4	CO5_HUMAN	swissprot_2012.fasta	188309	100.0%	45	59	64	0.456%	34.1%	IDTQDIEASHYR	K	G	99.7%	83.7	28.4	83.7	4.51	0	1	1	0	2	1447.68			72293.8	1381	1392	Empty	true
Exp1_01	Complement C5 OS=Homo sapiens GN=C5 PE=1 SV=4	CO5_HUMAN	swissprot_2012.fasta	188309	100.0%	45	59	64	0.456%	34.1%	IFELFEVGFLSPATFTVYEYHRPDK	R	Q	99.7%	49.4	29.7	33.9	0.000	0	0	0	1	2	3005.51			21326.3	1479	1503	Empty	true
Exp1_01	Complement C5 OS=Homo sapiens GN=C5 PE=1 SV=4	CO5_HUMAN	swissprot_2012.fasta	188309	100.0%	45	59	64	0.456%	34.1%	IPLDLVPK	R	T	99.7%	49.3	25.0	38.9	5.89	0	2	0	0	2	8945661			103417	963	970	Empty	true
Exp1_01	Complement C5 OS=Homo sapiens GN=C5 PE=1 SV=4	CO5_HUMAN	swissprot_2012.fasta	188309	100.0%	45	59	64	0.456%	34.1%	ITHYNYLILSK	K	G	99.7%	50.1	25.5	50.1	3.00	0	1	1	0	2	1364.76			85595.8	496	506	Empty	true
Exp1_01	Complement C5 OS=Homo sapiens GN=C5 PE=1 SV=4	CO5_HUMAN	swissprot_2012.fasta	188309	100.0%	45	59	64	0.456%	34.1%	LKEGMLSIMSYR	K	N	99.7%	47.3	28.7	21.6	1.74	0	1	0	0	2	1427.74			17911.9	1049	1060	Empty	true
Exp1_01	Complement C5 OS=Homo sapiens GN=C5 PE=1 SV=4	CO5_HUMAN	swissprot_2012.fasta	188309	100.0%	45	59	64	0.456%	34.1%	LNLVATPLFLKPGIPYPIK	K	V	99.7%	67.8	25.0	67.8	4.74	0	1	1	0	2	2094.27			217843	354	372	Empty	true
Exp1_01	Complement C5 OS=Homo sapiens GN=C5 PE=1 SV=4	CO5_HUMAN	swissprot_2012.fasta	188309	100.0%	45	59	64	0.456%	34.1%	LQGTLPVEAR	K	E	99.7%	53.1	25.0	38.8	4.13	0	1	0	0	2	1083.62			16262.1	1129	1138	Empty	true
Exp1_01	Complement C5 OS=Homo sapiens GN=C5 PE=1 SV=4	CO5_HUMAN	swissprot_2012.fasta	188309	100.0%	45	59	64	0.456%	34.1%	MPITYDNGFLFIHTDKPVYTPDQSVK	R	V	99.7%	60.1	29.9	60.1	3.48	0	0	0	2	2	3026.5			240079	117	142	Empty	true
Exp1_01	Complement C5 OS=Homo sapiens GN=C5 PE=1 SV=4	CO5_HUMAN	swissprot_2012.fasta	188309	100.0%	45	59	64	0.456%	34.1%	MVETTAYALLTSLNLK	R	D	99.7%	99.8	27.3	84.9	3.28	0	1	1	0	2	1767.96			128607	1247	1262	Empty	true
Exp1_01	Complement C5 OS=Homo sapiens GN=C5 PE=1 SV=4	CO5_HUMAN	swissprot_2012.fasta	188309	100.0%	45	59	64	0.456%	34.1%	NADYSYSVWK	R	G	99.7%	62.1	26.1	62.1	3.46	0	1	0	0	2	1232.56			21612.8	1061	1070	Empty	true
Exp1_01	Complement C5 OS=Homo sapiens GN=C5 PE=1 SV=4	CO5_HUMAN	swissprot_2012.fasta	188309	100.0%	45	59	64	0.456%	34.1%	QLPGGQNPVSYVYLEVVSK	K	H	99.7%	84.8	28.6	84.8	4.64	0	1	0	0	2	2077.1			48280.3	91	109	Empty	true
Exp1_01	Complement C5 OS=Homo sapiens GN=C5 PE=1 SV=4	CO5_HUMAN	swissprot_2012.fasta	188309	100.0%	45	59	64	0.456%	34.1%	RMPITYDNGFLFIHTDKPVYTPDQSVK	K	V	99.7%	67.0	29.6	56.9	4.46	0	0	0	2	2	3182.6			50329.7	116	142	Empty	true
Exp1_01	Complement C5 OS=Homo sapiens GN=C5 PE=1 SV=4	CO5_HUMAN	swissprot_2012.fasta	188309	100.0%	45	59	64	0.456%	34.1%	SPYIDKITHYNYLILSK	K	G	99.7%	33.8	27.6	33.8	3.82	0	0	0	1	2	2068.11			12135.4	490	506	Empty	true
Exp1_01	Complement C5 OS=Homo sapiens GN=C5 PE=1 SV=4	CO5_HUMAN	swissprot_2012.fasta	188309	100.0%	45	59	64	0.456%	34.1%	SYFPESWLWEVHLVPR	R	R	99.7%	50.5	29.8	50.5	4.80	0	0	1	0	2	2045.03			27516.8	767	782	Empty	true
Exp1_01	Complement C5 OS=Homo sapiens GN=C5 PE=1 SV=4	CO5_HUMAN	swissprot_2012.fasta	188309	100.0%	45	59	64	0.456%	34.1%	TDAPDLPEENQAR	K	E	99.7%	46.8	27.3	46.8	2.85	0	2	0	0	2	1455.67			14899.4	437	449	Empty	true
Exp1_01	Complement C5 OS=Homo sapiens GN=C5 PE=1 SV=4	CO5_HUMAN	swissprot_2012.fasta	188309	100.0%	45	59	64	0.456%	34.1%	TGEAVAEKDSEITFIK	K	K	99.7%	67.9	28.7	67.9	6.18	0	1	1	0	2	1737.89			20660.4	1587	1602	Empty	true
Exp1_01	Complement C5 OS=Homo sapiens GN=C5 PE=1 SV=4	CO5_HUMAN	swissprot_2012.fasta	188309	100.0%	45	59	64	0.456%	34.1%	TGEAVAEKDSEITFIKK	K	V	99.7%	59.5	28.2	59.5	2.01	0	0	1	1	2	1865.99			133254	1587	1603	Empty	true
Exp1_01	Complement C5 OS=Homo sapiens GN=C5 PE=1 SV=4	CO5_HUMAN	swissprot_2012.fasta	188309	100.0%	45	59	64	0.456%	34.1%	TLLPVSKPEIR	K	S	99.7%	47.3	25.0	47.3	2.15	0	1	2	0	2	1252.76			80368	756	766	Empty	true
Exp1_01	Complement C5 OS=Homo sapiens GN=C5 PE=1 SV=4	CO5_HUMAN	swissprot_2012.fasta	188309	100.0%	45	59	64	0.456%	34.1%	VDDGVASFVLNLPSGVTVLEFNVK	R	T	98.4%	25.8	26.9	25.8	1.35	0	0	1	0	2	2519.34			16634.3	413	436	Empty	true
Exp1_01	Complement C5 OS=Homo sapiens GN=C5 PE=1 SV=4	CO5_HUMAN	swissprot_2012.fasta	188309	100.0%	45	59	64	0.456%	34.1%	VFQFLEK	R	S	99.1%	41.5	25.8	17.9	0.000	0	1	0	0	2	9105033			17403.1	623	629	Empty	true
Exp1_01	Complement C5 OS=Homo sapiens GN=C5 PE=1 SV=4	CO5_HUMAN	swissprot_2012.fasta	188309	100.0%	45	59	64	0.456%	34.1%	VSITSITVENVFVK	K	Y	99.7%	67.7	25.0	67.7	3.21	0	1	1	0	2	1535.87			45815.9	1563	1576	Empty	true
Exp1_01	Complement C5 OS=Homo sapiens GN=C5 PE=1 SV=4	CO5_HUMAN	swissprot_2012.fasta	188309	100.0%	45	59	64	0.456%	34.1%	VYSLNDDLKPAK	R	R	99.7%	50.7	28.7	36.8	3.32	0	1	0	0	2	1362.73			4055.06	145	156	Empty	true
Exp1_01	Complement C5 OS=Homo sapiens GN=C5 PE=1 SV=4	CO5_HUMAN	swissprot_2012.fasta	188309	100.0%	45	59	64	0.456%	34.1%	YGGGFYSTQDTINAIEGLTEYSLLVK	R	Q	99.7%	35.7	30.2	19.9	1.68	0	0	1	0	2	2839.4			2054.55	1280	1305	Empty	true
Exp1_01	Complement C5 OS=Homo sapiens GN=C5 PE=1 SV=4	CO5_HUMAN	swissprot_2012.fasta	188309	100.0%	45	59	64	0.456%	34.1%	YGMWTIK	R	A	99.7%	28.1	25.0	28.1	4.11	0	1	0	0	2	8984492			106992	196	202	Empty	true
Exp1_01	Complement C5 OS=Homo sapiens GN=C5 PE=1 SV=4	CO5_HUMAN	swissprot_2012.fasta	188309	100.0%	45	59	64	0.456%	34.1%	YKATLLDIYK	K	T	99.7%	41.3	27.0	41.3	2.31	0	0	1	0	2	1227.7			19801.4	1577	1586	Empty	true
Exp1_01	Complement C5 OS=Homo sapiens GN=C5 PE=1 SV=4	CO5_HUMAN	swissprot_2012.fasta	188309	100.0%	45	59	64	0.456%	34.1%	YKEDFSTTGTAYFEVK	K	E	99.7%	44.6	28.9	44.6	1.46	0	0	1	0	2	1885.89			7082.43	205	220	Empty	true
Exp1_01	Serum albumin OS=Homo sapiens GN=ALB PE=1 SV=2	ALBU_HUMAN	swissprot_2012.fasta	69366.9	100.0%	35	52	108	0.770%	50.6%	AEFAEVSK	K	L	99.7%	52.1	26.6	35.2	1.41	0	2	0	0	2	8804410			287585	250	257	Empty	true
Exp1_01	Serum albumin OS=Homo sapiens GN=ALB PE=1 SV=2	ALBU_HUMAN	swissprot_2012.fasta	69366.9	100.0%	35	52	108	0.770%	50.6%	AEFAEVSKLVTDLTK	K	V	99.7%	38.9	25.9	38.9	1.19	0	0	1	0	2	1650.89			10263.9	250	264	Empty	true
Exp1_01	Serum albumin OS=Homo sapiens GN=ALB PE=1 SV=2	ALBU_HUMAN	swissprot_2012.fasta	69366.9	100.0%	35	52	108	0.770%	50.6%	AFKAWAVAR	R	L	99.7%	49.5	25.0	38.5	1.77	0	1	0	0	2	1019.58			31851.7	234	242	Empty	true
Exp1_01	Serum albumin OS=Homo sapiens GN=ALB PE=1 SV=2	ALBU_HUMAN	swissprot_2012.fasta	69366.9	100.0%	35	52	108	0.770%	50.6%	ALVLIAFAQYLQQCPFEDHVK	K	L	99.7%	48.7	29.5	34.3	5.44	0	1	1	0	2	2533.28			8640.69	45	65	Empty	true
Exp1_01	Serum albumin OS=Homo sapiens GN=ALB PE=1 SV=2	ALBU_HUMAN	swissprot_2012.fasta	69366.9	100.0%	35	52	108	0.770%	50.6%	AVMDDFAAFVEK	K	C	99.7%	60.0	27.2	41.8	4.14	0	3	1	0	2	1342.63			195783	570	581	Empty	true
Exp1_01	Serum albumin OS=Homo sapiens GN=ALB PE=1 SV=2	ALBU_HUMAN	swissprot_2012.fasta	69366.9	100.0%	35	52	108	0.770%	50.6%	DDNPNLPR	K	L	99.4%	31.0	26.5	14.6	1.54	0	2	0	0	2	9404484			541669	131	138	Empty	true
Exp1_01	Serum albumin OS=Homo sapiens GN=ALB PE=1 SV=2	ALBU_HUMAN	swissprot_2012.fasta	69366.9	100.0%	35	52	108	0.770%	50.6%	DLGEENFK	K	A	97.0%	23.1	26.1	9.87	1.89	0	1	0	0	2	9514419			15818.9	37	44	Empty	true
Exp1_01	Serum albumin OS=Homo sapiens GN=ALB PE=1 SV=2	ALBU_HUMAN	swissprot_2012.fasta	69366.9	100.0%	35	52	108	0.770%	50.6%	DVFLGMFLYEYAR	K	R	99.7%	72.9	29.4	72.9	4.68	0	18	1	0	2	1623.79			53132	348	360	Empty	true
Exp1_01	Serum albumin OS=Homo sapiens GN=ALB PE=1 SV=2	ALBU_HUMAN	swissprot_2012.fasta	69366.9	100.0%	35	52	108	0.770%	50.6%	FKDLGEENFK	R	A	99.7%	40.6	27.3	18.1	1.23	0	2	3	0	2	1226.61			410042	35	44	Empty	true
Exp1_01	Serum albumin OS=Homo sapiens GN=ALB PE=1 SV=2	ALBU_HUMAN	swissprot_2012.fasta	69366.9	100.0%	35	52	108	0.770%	50.6%	FQNALLVR	K	Y	99.7%	58.5	25.0	23.0	0.000	0	5	0	0	2	9605625			980466	427	434	Empty	true
Exp1_01	Serum albumin OS=Homo sapiens GN=ALB PE=1 SV=2	ALBU_HUMAN	swissprot_2012.fasta	69366.9	100.0%	35	52	108	0.770%	50.6%	HKPKATKEQLK	K	A	98.7%	36.3	25.0	36.3	0.000	0	0	1	0	2	1307.78			2377.05	559	569	Empty	true
Exp1_01	Serum albumin OS=Homo sapiens GN=ALB PE=1 SV=2	ALBU_HUMAN	swissprot_2012.fasta	69366.9	100.0%	35	52	108	0.770%	50.6%	HPDYSVVLLLR	R	L	99.7%	50.8	25.2	18.2	1.72	0	0	1	0	2	1311.74			4830.72	362	372	Empty	true
Exp1_01	Serum albumin OS=Homo sapiens GN=ALB PE=1 SV=2	ALBU_HUMAN	swissprot_2012.fasta	69366.9	100.0%	35	52	108	0.770%	50.6%	HPYFYAPELLFFAK	R	R	99.7%	52.3	29.4	31.7	3.74	0	1	2	0	2	1742.89			1074530	170	183	Empty	true
Exp1_01	Serum albumin OS=Homo sapiens GN=ALB PE=1 SV=2	ALBU_HUMAN	swissprot_2012.fasta	69366.9	100.0%	35	52	108	0.770%	50.6%	KQTALVELVK	K	H	99.7%	52.5	25.0	21.1	1.92	0	2	0	0	2	1128.7			74563.1	549	558	Empty	true
Exp1_01	Serum albumin OS=Homo sapiens GN=ALB PE=1 SV=2	ALBU_HUMAN	swissprot_2012.fasta	69366.9	100.0%	35	52	108	0.770%	50.6%	KVPQVSTPTLVEVSR	K	N	99.7%	103	25.0	103	4.24	0	5	4	0	2	1639.94			1335980	438	452	Empty	true
Exp1_01	Serum albumin OS=Homo sapiens GN=ALB PE=1 SV=2	ALBU_HUMAN	swissprot_2012.fasta	69366.9	100.0%	35	52	108	0.770%	50.6%	LAKTYETTLEK	R	C	99.7%	61.9	26.4	44.0	4.24	0	1	1	0	2	1296.7			57293.2	373	383	Empty	true
Exp1_01	Serum albumin OS=Homo sapiens GN=ALB PE=1 SV=2	ALBU_HUMAN	swissprot_2012.fasta	69366.9	100.0%	35	52	108	0.770%	50.6%	LDELRDEGK	K	A	96.0%	39.7	30.0	18.3	0.000	0	2	0	0	2	1074.54			131121	206	214	Empty	true
Exp1_01	Serum albumin OS=Homo sapiens GN=ALB PE=1 SV=2	ALBU_HUMAN	swissprot_2012.fasta	69366.9	100.0%	35	52	108	0.770%	50.6%	LDELRDEGKASSAK	K	Q	95.0%	35.7	29.8	23.3	0.000	0	0	1	0	2	1518.78			31822.1	206	219	Empty	true
Exp1_01	Serum albumin OS=Homo sapiens GN=ALB PE=1 SV=2	ALBU_HUMAN	swissprot_2012.fasta	69366.9	100.0%	35	52	108	0.770%	50.6%	LSQRFPKAEFAEVSK	R	L	99.7%	33.8	27.9	33.8	1.39	0	0	1	0	2	1736.93			11136.8	243	257	Empty	true
Exp1_01	Serum albumin OS=Homo sapiens GN=ALB PE=1 SV=2	ALBU_HUMAN	swissprot_2012.fasta	69366.9	100.0%	35	52	108	0.770%	50.6%	LVAASQAALGL	K	-	99.7%	86.0	25.0	86.0	5.22	0	7	0	0	2	1013.6			273828	599	609	Empty	true
Exp1_01	Serum albumin OS=Homo sapiens GN=ALB PE=1 SV=2	ALBU_HUMAN	swissprot_2012.fasta	69366.9	100.0%	35	52	108	0.770%	50.6%	LVNEVTEFAK	K	T	99.7%	62.5	28.0	45.1	4.80	0	4	0	0	2	1149.62			604168	66	75	Empty	true
Exp1_01	Serum albumin OS=Homo sapiens GN=ALB PE=1 SV=2	ALBU_HUMAN	swissprot_2012.fasta	69366.9	100.0%	35	52	108	0.770%	50.6%	LVRPEVDVMCTAFHDNEETFLKK	R	Y	99.4%	39.5	30.3	28.5	0.000	0	0	0	1	2	2821.35			155544	139	161	Empty	true
Exp1_01	Serum albumin OS=Homo sapiens GN=ALB PE=1 SV=2	ALBU_HUMAN	swissprot_2012.fasta	69366.9	100.0%	35	52	108	0.770%	50.6%	NECFLQHKDDNPNLPR	R	L	99.7%	45.4	28.5	45.4	2.11	0	0	1	0	2	1997.91			9584.59	123	138	Empty	true
Exp1_01	Serum albumin OS=Homo sapiens GN=ALB PE=1 SV=2	ALBU_HUMAN	swissprot_2012.fasta	69366.9	100.0%	35	52	108	0.770%	50.6%	QTALVELVK	K	H	98.6%	40.6	26.6	25.6	0.000	0	2	0	0	2	1000.6			331468	550	558	Empty	true
Exp1_01	Serum albumin OS=Homo sapiens GN=ALB PE=1 SV=2	ALBU_HUMAN	swissprot_2012.fasta	69366.9	100.0%	35	52	108	0.770%	50.6%	RHPDYSVVLLLR	R	L	99.7%	86.7	25.0	54.3	3.39	0	0	8	0	2	1467.84			2427090	361	372	Empty	true
Exp1_01	Serum albumin OS=Homo sapiens GN=ALB PE=1 SV=2	ALBU_HUMAN	swissprot_2012.fasta	69366.9	100.0%	35	52	108	0.770%	50.6%	RHPYFYAPELLFFAK	R	R	99.7%	54.9	29.4	40.6	8.68	0	1	2	1	2	1899			533440	169	183	Empty	true
Exp1_01	Serum albumin OS=Homo sapiens GN=ALB PE=1 SV=2	ALBU_HUMAN	swissprot_2012.fasta	69366.9	100.0%	35	52	108	0.770%	50.6%	RHPYFYAPELLFFAKR	R	Y	99.7%	76.6	28.4	76.6	5.59	0	0	0	1	2	2055.1			185297	169	184	Empty	true
Exp1_01	Serum albumin OS=Homo sapiens GN=ALB PE=1 SV=2	ALBU_HUMAN	swissprot_2012.fasta	69366.9	100.0%	35	52	108	0.770%	50.6%	RPCFSALEVDETYVPK	R	E	97.6%	41.1	29.4	41.1	0.000	0	1	0	0	2	1953.93			6614.67	509	524	Empty	true
Exp1_01	Serum albumin OS=Homo sapiens GN=ALB PE=1 SV=2	ALBU_HUMAN	swissprot_2012.fasta	69366.9	100.0%	35	52	108	0.770%	50.6%	SLHTLFGDK	K	L	99.7%	41.7	30.0	24.9	2.06	0	2	0	0	2	1017.54			222404	89	97	Empty	true
Exp1_01	Serum albumin OS=Homo sapiens GN=ALB PE=1 SV=2	ALBU_HUMAN	swissprot_2012.fasta	69366.9	100.0%	35	52	108	0.770%	50.6%	TYETTLEK	K	C	99.7%	38.4	25.2	38.4	1.28	0	2	0	0	2	9844885			446465	376	383	Empty	true
Exp1_01	Serum albumin OS=Homo sapiens GN=ALB PE=1 SV=2	ALBU_HUMAN	swissprot_2012.fasta	69366.9	100.0%	35	52	108	0.770%	50.6%	VFDEFKPLVEEPQNLIK	K	Q	99.7%	66.1	27.4	66.1	4.89	0	1	2	0	2	2045.1			415324	397	413	Empty	true
Exp1_01	Serum albumin OS=Homo sapiens GN=ALB PE=1 SV=2	ALBU_HUMAN	swissprot_2012.fasta	69366.9	100.0%	35	52	108	0.770%	50.6%	VPQVSTPTLVEVSR	K	N	99.7%	71.9	27.0	71.9	4.74	0	1	0	0	2	1511.84			26531.2	439	452	Empty	true
Exp1_01	Serum albumin OS=Homo sapiens GN=ALB PE=1 SV=2	ALBU_HUMAN	swissprot_2012.fasta	69366.9	100.0%	35	52	108	0.770%	50.6%	YICENQDSISSK	K	L	99.7%	47.5	25.0	47.5	3.36	0	1	0	0	2	1444.63			19583.6	287	298	Empty	true
Exp1_01	Serum albumin OS=Homo sapiens GN=ALB PE=1 SV=2	ALBU_HUMAN	swissprot_2012.fasta	69366.9	100.0%	35	52	108	0.770%	50.6%	YLYEIAR	K	R	99.7%	42.0	26.3	27.3	3.20	0	3	0	0	2	9274934			1247290	162	168	Empty	true
Exp1_01	Serum albumin OS=Homo sapiens GN=ALB PE=1 SV=2	ALBU_HUMAN	swissprot_2012.fasta	69366.9	100.0%	35	52	108	0.770%	50.6%	YTKKVPQVSTPTLVEVSR	R	N	99.7%	74.6	25.0	74.6	2.52	0	0	1	0	2	2032.14			33870	435	452	Empty	true
Exp1_01	Apolipoprotein E OS=Homo sapiens GN=APOE PE=1 SV=1	APOE_HUMAN	swissprot_2012.fasta	36153.5	100.0%	25	35	42	0.299%	70.7%	AATVGSLAGQPLQER	R	A	99.7%	78.1	27.7	67.3	4.20	0	1	1	0	2	1497.8			90372	210	224	Empty	true
Exp1_01	Apolipoprotein E OS=Homo sapiens GN=APOE PE=1 SV=1	APOE_HUMAN	swissprot_2012.fasta	36153.5	100.0%	25	35	42	0.299%	70.7%	AKLEEQAQQIR	R	L	99.7%	75.4	28.4	64.4	3.30	0	2	3	0	2	1313.72			481694	259	269	Empty	true
Exp1_01	Apolipoprotein E OS=Homo sapiens GN=APOE PE=1 SV=1	APOE_HUMAN	swissprot_2012.fasta	36153.5	100.0%	25	35	42	0.299%	70.7%	ALMDETMK	R	E	99.7%	36.3	25.2	26.3	2.09	0	1	0	0	2	9384323			126859	80	87	Empty	true
Exp1_01	Apolipoprotein E OS=Homo sapiens GN=APOE PE=1 SV=1	APOE_HUMAN	swissprot_2012.fasta	36153.5	100.0%	25	35	42	0.299%	70.7%	ALMDETMKELK	R	A	99.7%	59.6	28.6	47.7	2.74	0	1	0	0	2	1308.65			13696.6	80	90	Empty	true
Exp1_01	Apolipoprotein E OS=Homo sapiens GN=APOE PE=1 SV=1	APOE_HUMAN	swissprot_2012.fasta	36153.5	100.0%	25	35	42	0.299%	70.7%	AQAWGER	R	L	98.9%	40.8	25.7	28.7	0.000	0	1	0	0	2	8173951			59232.6	225	231	Empty	true
Exp1_01	Apolipoprotein E OS=Homo sapiens GN=APOE PE=1 SV=1	APOE_HUMAN	swissprot_2012.fasta	36153.5	100.0%	25	35	42	0.299%	70.7%	ARMEEMGSR	R	T	99.7%	48.8	25.6	30.8	1.96	0	1	0	0	2	1066.48			9524	234	242	Empty	true
Exp1_01	Apolipoprotein E OS=Homo sapiens GN=APOE PE=1 SV=1	APOE_HUMAN	swissprot_2012.fasta	36153.5	100.0%	25	35	42	0.299%	70.7%	AYKSELEEQLTPVAEETR	K	A	99.7%	114	30.4	95.0	7.17	0	1	2	0	2	2093.04			91051.1	91	108	Empty	true
Exp1_01	Apolipoprotein E OS=Homo sapiens GN=APOE PE=1 SV=1	APOE_HUMAN	swissprot_2012.fasta	36153.5	100.0%	25	35	42	0.299%	70.7%	DRLDEVKEQVAEVR	R	A	99.7%	84.2	29.3	63.6	5.00	0	1	1	1	2	1685.88			188953	245	258	Empty	true
Exp1_01	Apolipoprotein E OS=Homo sapiens GN=APOE PE=1 SV=1	APOE_HUMAN	swissprot_2012.fasta	36153.5	100.0%	25	35	42	0.299%	70.7%	GEVQAMLGQSTEELR	R	V	99.7%	98.1	29.9	87.8	5.05	0	3	1	0	2	1647.8			58463.1	138	152	Empty	true
Exp1_01	Apolipoprotein E OS=Homo sapiens GN=APOE PE=1 SV=1	APOE_HUMAN	swissprot_2012.fasta	36153.5	100.0%	25	35	42	0.299%	70.7%	GEVQAMLGQSTEELRVR	R	L	99.7%	49.9	30.1	37.6	2.14	0	0	1	0	2	1902.97			32414.6	138	154	Empty	true
Exp1_01	Apolipoprotein E OS=Homo sapiens GN=APOE PE=1 SV=1	APOE_HUMAN	swissprot_2012.fasta	36153.5	100.0%	25	35	42	0.299%	70.7%	LAVYQAGAR	R	E	99.7%	60.5	26.3	42.6	0.000	0	1	0	0	2	9485261			4247.78	177	185	Empty	true
Exp1_01	Apolipoprotein E OS=Homo sapiens GN=APOE PE=1 SV=1	APOE_HUMAN	swissprot_2012.fasta	36153.5	100.0%	25	35	42	0.299%	70.7%	LDEVKEQVAEVR	R	A	99.7%	60.7	29.4	42.9	4.44	0	1	0	0	2	1414.75			11903.3	247	258	Empty	true
Exp1_01	Apolipoprotein E OS=Homo sapiens GN=APOE PE=1 SV=1	APOE_HUMAN	swissprot_2012.fasta	36153.5	100.0%	25	35	42	0.299%	70.7%	LEEQAQQIR	K	L	99.7%	53.6	30.1	27.5	3.09	0	1	0	0	2	1114.59			5201.79	261	269	Empty	true
Exp1_01	Apolipoprotein E OS=Homo sapiens GN=APOE PE=1 SV=1	APOE_HUMAN	swissprot_2012.fasta	36153.5	100.0%	25	35	42	0.299%	70.7%	LGPLVEQGR	R	V	99.7%	50.6	25.0	36.5	1.57	0	2	0	0	2	9685525			272030	199	207	Empty	true
Exp1_01	Apolipoprotein E OS=Homo sapiens GN=APOE PE=1 SV=1	APOE_HUMAN	swissprot_2012.fasta	36153.5	100.0%	25	35	42	0.299%	70.7%	LKSWFEPLVEDMQR	R	Q	99.7%	53.0	30.2	31.5	2.16	0	0	1	0	2	1777.89			13097.5	279	292	Empty	true
Exp1_01	Apolipoprotein E OS=Homo sapiens GN=APOE PE=1 SV=1	APOE_HUMAN	swissprot_2012.fasta	36153.5	100.0%	25	35	42	0.299%	70.7%	LQAEAFQAR	R	L	99.7%	48.5	28.9	27.7	1.66	0	1	0	0	2	1033.54			57553.3	270	278	Empty	true
Exp1_01	Apolipoprotein E OS=Homo sapiens GN=APOE PE=1 SV=1	APOE_HUMAN	swissprot_2012.fasta	36153.5	100.0%	25	35	42	0.299%	70.7%	LSKELQAAQAR	R	L	99.7%	53.5	28.3	53.5	1.96	0	1	0	0	2	1214.69			5781.78	111	121	Empty	true
Exp1_01	Apolipoprotein E OS=Homo sapiens GN=APOE PE=1 SV=1	APOE_HUMAN	swissprot_2012.fasta	36153.5	100.0%	25	35	42	0.299%	70.7%	LVQYRGEVQAMLGQSTEELR	R	V	97.1%	37.6	29.5	22.2	0.000	0	0	1	0	2	2307.18			7371.21	133	152	Empty	true
Exp1_01	Apolipoprotein E OS=Homo sapiens GN=APOE PE=1 SV=1	APOE_HUMAN	swissprot_2012.fasta	36153.5	100.0%	25	35	42	0.299%	70.7%	QQTEWQSGQR	R	W	99.7%	46.5	27.2	46.5	2.85	0	1	0	0	2	1247.58			9449.51	34	43	Empty	true
Exp1_01	Apolipoprotein E OS=Homo sapiens GN=APOE PE=1 SV=1	APOE_HUMAN	swissprot_2012.fasta	36153.5	100.0%	25	35	42	0.299%	70.7%	RLAVYQAGAR	K	E	99.7%	35.6	25.0	23.9	1.96	0	1	0	0	2	1104.63			9074.5	176	185	Empty	true
Exp1_01	Apolipoprotein E OS=Homo sapiens GN=APOE PE=1 SV=1	APOE_HUMAN	swissprot_2012.fasta	36153.5	100.0%	25	35	42	0.299%	70.7%	SELEEQLTPVAEETR	K	A	99.7%	102	29.9	102	4.89	0	2	0	0	2	1730.84			13351	94	108	Empty	true
Exp1_01	Apolipoprotein E OS=Homo sapiens GN=APOE PE=1 SV=1	APOE_HUMAN	swissprot_2012.fasta	36153.5	100.0%	25	35	42	0.299%	70.7%	SWFEPLVEDMQR	K	Q	99.7%	59.3	29.0	24.3	4.17	0	1	1	0	2	1536.72			129564	281	292	Empty	true
Exp1_01	Apolipoprotein E OS=Homo sapiens GN=APOE PE=1 SV=1	APOE_HUMAN	swissprot_2012.fasta	36153.5	100.0%	25	35	42	0.299%	70.7%	VEQAVETEPEPELR	K	Q	99.7%	79.3	29.3	59.4	4.77	0	1	0	0	2	1625.8			9457.2	20	33	Empty	true
Exp1_01	Apolipoprotein E OS=Homo sapiens GN=APOE PE=1 SV=1	APOE_HUMAN	swissprot_2012.fasta	36153.5	100.0%	25	35	42	0.299%	70.7%	VQAAVGTSAAPVPSDNH	K	-	99.7%	53.2	29.7	53.2	3.35	0	2	0	0	2	1620.8			294904	301	317	Empty	true
Exp1_01	Apolipoprotein E OS=Homo sapiens GN=APOE PE=1 SV=1	APOE_HUMAN	swissprot_2012.fasta	36153.5	100.0%	25	35	42	0.299%	70.7%	WVQTLSEQVQEELLSSQVTQELR	R	A	99.7%	132	29.4	122	5.60	0	1	1	0	2	2730.39			9217.1	57	79	Empty	true
Exp1_01	Apolipoprotein A-I OS=Homo sapiens GN=APOA1 PE=1 SV=1	APOA1_HUMAN	swissprot_2012.fasta	30778.5	100.0%	23	29	30	0.214%	66.7%	ATEHLSTLSEK	K	A	99.7%	47.8	29.4	35.3	3.00	0	1	1	0	2	1215.62			144900	220	230	Empty	true
Exp1_01	Apolipoprotein A-I OS=Homo sapiens GN=APOA1 PE=1 SV=1	APOA1_HUMAN	swissprot_2012.fasta	30778.5	100.0%	23	29	30	0.214%	66.7%	DLATVYVDVLK	K	D	99.7%	70.4	25.2	53.2	3.37	0	2	0	0	2	1235.69			114399	37	47	Empty	true
Exp1_01	Apolipoprotein A-I OS=Homo sapiens GN=APOA1 PE=1 SV=1	APOA1_HUMAN	swissprot_2012.fasta	30778.5	100.0%	23	29	30	0.214%	66.7%	DSGRDYVSQFEGSALGK	K	Q	99.7%	94.5	28.5	79.8	4.85	0	1	1	0	2	1815.85			64997.7	48	64	Empty	true
Exp1_01	Apolipoprotein A-I OS=Homo sapiens GN=APOA1 PE=1 SV=1	APOA1_HUMAN	swissprot_2012.fasta	30778.5	100.0%	23	29	30	0.214%	66.7%	DYVSQFEGSALGK	R	Q	99.7%	88.8	27.8	63.1	5.48	0	1	0	0	2	1400.67			36966.8	52	64	Empty	true
Exp1_01	Apolipoprotein A-I OS=Homo sapiens GN=APOA1 PE=1 SV=1	APOA1_HUMAN	swissprot_2012.fasta	30778.5	100.0%	23	29	30	0.214%	66.7%	ETEGLRQEMSK	K	D	99.7%	38.7	28.8	38.7	2.34	0	1	0	0	2	1307.63			7031.49	102	112	Empty	true
Exp1_01	Apolipoprotein A-I OS=Homo sapiens GN=APOA1 PE=1 SV=1	APOA1_HUMAN	swissprot_2012.fasta	30778.5	100.0%	23	29	30	0.214%	66.7%	KWQEEMELYR	K	Q	98.5%	41.4	27.8	27.7	0.000	0	1	0	0	2	1411.67			21258.6	131	140	Empty	true
Exp1_01	Apolipoprotein A-I OS=Homo sapiens GN=APOA1 PE=1 SV=1	APOA1_HUMAN	swissprot_2012.fasta	30778.5	100.0%	23	29	30	0.214%	66.7%	LAARLEALKENGGAR	R	L	96.2%	32.9	25.9	10.1	0.000	0	0	1	0	2	1568.89			19139.4	198	212	Empty	true
Exp1_01	Apolipoprotein A-I OS=Homo sapiens GN=APOA1 PE=1 SV=1	APOA1_HUMAN	swissprot_2012.fasta	30778.5	100.0%	23	29	30	0.214%	66.7%	LEALKENGGAR	R	L	99.7%	49.6	29.5	29.6	0.000	0	1	0	0	2	1158.61			9499.41	202	212	Empty	true
Exp1_01	Apolipoprotein A-I OS=Homo sapiens GN=APOA1 PE=1 SV=1	APOA1_HUMAN	swissprot_2012.fasta	30778.5	100.0%	23	29	30	0.214%	66.7%	LHELQEK	K	L	99.0%	28.1	25.0	7.16	1.70	0	1	0	0	2	8964837			39381.8	158	164	Empty	true
Exp1_01	Apolipoprotein A-I OS=Homo sapiens GN=APOA1 PE=1 SV=1	APOA1_HUMAN	swissprot_2012.fasta	30778.5	100.0%	23	29	30	0.214%	66.7%	LLDNWDSVTSTFSK	K	L	99.7%	116	29.4	105	5.04	0	1	0	0	2	1612.79			32479	70	83	Empty	true
Exp1_01	Apolipoprotein A-I OS=Homo sapiens GN=APOA1 PE=1 SV=1	APOA1_HUMAN	swissprot_2012.fasta	30778.5	100.0%	23	29	30	0.214%	66.7%	LREQLGPVTQEFWDNLEK	K	E	99.7%	60.3	29.7	41.1	3.66	0	0	1	0	2	2202.12			98287.8	84	101	Empty	true
Exp1_01	Apolipoprotein A-I OS=Homo sapiens GN=APOA1 PE=1 SV=1	APOA1_HUMAN	swissprot_2012.fasta	30778.5	100.0%	23	29	30	0.214%	66.7%	LREQLGPVTQEFWDNLEKETEGLR	K	Q	99.7%	36.3	29.8	36.3	1.17	0	0	0	1	2	2887.46			20047	84	107	Empty	true
Exp1_01	Apolipoprotein A-I OS=Homo sapiens GN=APOA1 PE=1 SV=1	APOA1_HUMAN	swissprot_2012.fasta	30778.5	100.0%	23	29	30	0.214%	66.7%	LSPLGEEMR	K	D	99.7%	46.6	29.5	46.6	1.38	0	1	0	0	2	1031.52			159620	165	173	Empty	true
Exp1_01	Apolipoprotein A-I OS=Homo sapiens GN=APOA1 PE=1 SV=1	APOA1_HUMAN	swissprot_2012.fasta	30778.5	100.0%	23	29	30	0.214%	66.7%	QEMSKDLEEVK	R	A	99.7%	42.4	29.3	28.2	2.28	0	1	0	0	2	1335.65			4540.13	108	118	Empty	true
Exp1_01	Apolipoprotein A-I OS=Homo sapiens GN=APOA1 PE=1 SV=1	APOA1_HUMAN	swissprot_2012.fasta	30778.5	100.0%	23	29	30	0.214%	66.7%	QGLLPVLESFK	R	V	99.7%	49.7	26.0	49.7	4.92	0	1	0	0	2	1230.71			19472.3	240	250	Empty	true
Exp1_01	Apolipoprotein A-I OS=Homo sapiens GN=APOA1 PE=1 SV=1	APOA1_HUMAN	swissprot_2012.fasta	30778.5	100.0%	23	29	30	0.214%	66.7%	THLAPYSDELR	R	Q	99.7%	50.1	29.1	39.2	3.52	0	1	1	0	2	1301.65			95114.6	185	195	Empty	true
Exp1_01	Apolipoprotein A-I OS=Homo sapiens GN=APOA1 PE=1 SV=1	APOA1_HUMAN	swissprot_2012.fasta	30778.5	100.0%	23	29	30	0.214%	66.7%	THLAPYSDELRQR	R	L	99.3%	30.6	29.2	18.0	1.47	0	0	1	0	2	1585.81			27976.9	185	197	Empty	true
Exp1_01	Apolipoprotein A-I OS=Homo sapiens GN=APOA1 PE=1 SV=1	APOA1_HUMAN	swissprot_2012.fasta	30778.5	100.0%	23	29	30	0.214%	66.7%	VKDLATVYVDVLK	R	D	99.7%	67.7	25.0	57.0	4.30	0	1	1	0	2	1462.85			179430	35	47	Empty	true
Exp1_01	Apolipoprotein A-I OS=Homo sapiens GN=APOA1 PE=1 SV=1	APOA1_HUMAN	swissprot_2012.fasta	30778.5	100.0%	23	29	30	0.214%	66.7%	VKDLATVYVDVLKDSGR	R	D	99.7%	51.7	25.7	51.7	3.77	0	0	1	1	2	1878.03			14468.1	35	51	Empty	true
Exp1_01	Apolipoprotein A-I OS=Homo sapiens GN=APOA1 PE=1 SV=1	APOA1_HUMAN	swissprot_2012.fasta	30778.5	100.0%	23	29	30	0.214%	66.7%	VQPYLDDFQKK	K	W	99.7%	36.9	28.3	22.5	2.37	0	1	1	0	2	1380.72			301889	121	131	Empty	true
Exp1_01	Apolipoprotein A-I OS=Homo sapiens GN=APOA1 PE=1 SV=1	APOA1_HUMAN	swissprot_2012.fasta	30778.5	100.0%	23	29	30	0.214%	66.7%	VSFLSALEEYTK	K	K	99.7%	89.9	29.0	89.9	4.64	0	1	0	0	2	1386.72			290800	251	262	Empty	true
Exp1_01	Apolipoprotein A-I OS=Homo sapiens GN=APOA1 PE=1 SV=1	APOA1_HUMAN	swissprot_2012.fasta	30778.5	100.0%	23	29	30	0.214%	66.7%	VSFLSALEEYTKK	K	L	99.7%	37.7	29.3	37.7	1.80	0	0	1	0	2	1514.81			89179.1	251	263	Empty	true
Exp1_01	Apolipoprotein A-I OS=Homo sapiens GN=APOA1 PE=1 SV=1	APOA1_HUMAN	swissprot_2012.fasta	30778.5	100.0%	23	29	30	0.214%	66.7%	WQEEMELYR	K	Q	99.7%	39.2	25.4	39.2	1.60	0	1	0	0	2	1283.57			22224	132	140	Empty	true
Exp1_01	Fibrinogen beta chain OS=Homo sapiens GN=FGB PE=1 SV=2	FIBB_HUMAN	swissprot_2012.fasta	55928.6	100.0%	21	27	31	0.221%	44.8%	AHYGGFTVQNEANK	K	Y	99.7%	77.0	28.9	77.0	5.55	0	1	1	0	2	1535.72			23254.1	354	367	Empty	true
Exp1_01	Fibrinogen beta chain OS=Homo sapiens GN=FGB PE=1 SV=2	FIBB_HUMAN	swissprot_2012.fasta	55928.6	100.0%	21	27	31	0.221%	44.8%	DNDGWLTSDPR	R	K	99.7%	50.6	25.0	40.1	2.96	0	1	0	0	2	1275.56			16594.3	411	421	Empty	true
Exp1_01	Fibrinogen beta chain OS=Homo sapiens GN=FGB PE=1 SV=2	FIBB_HUMAN	swissprot_2012.fasta	55928.6	100.0%	21	27	31	0.221%	44.8%	DNENVVNEYSSELEK	K	H	99.7%	86.3	26.6	86.3	7.74	0	1	0	0	2	1768.79			7380.55	164	178	Empty	true
Exp1_01	Fibrinogen beta chain OS=Homo sapiens GN=FGB PE=1 SV=2	FIBB_HUMAN	swissprot_2012.fasta	55928.6	100.0%	21	27	31	0.221%	44.8%	EDGGGWWYNR	K	C	99.7%	45.1	25.0	45.1	0.000	0	1	0	0	2	1239.52			14395.1	427	436	Empty	true
Exp1_01	Fibrinogen beta chain OS=Homo sapiens GN=FGB PE=1 SV=2	FIBB_HUMAN	swissprot_2012.fasta	55928.6	100.0%	21	27	31	0.221%	44.8%	EEAPSLRPAPPPISGGGYR	R	A	99.7%	57.6	29.6	57.6	3.68	0	0	1	0	2	1951			26128.6	54	72	Empty	true
Exp1_01	Fibrinogen beta chain OS=Homo sapiens GN=FGB PE=1 SV=2	FIBB_HUMAN	swissprot_2012.fasta	55928.6	100.0%	21	27	31	0.221%	44.8%	GGETSEMYLIQPDSSVKPYR	K	V	99.7%	73.3	29.8	56.6	4.19	0	1	1	0	2	2257.08			19108.4	248	267	Empty	true
Exp1_01	Fibrinogen beta chain OS=Homo sapiens GN=FGB PE=1 SV=2	FIBB_HUMAN	swissprot_2012.fasta	55928.6	100.0%	21	27	31	0.221%	44.8%	HGTDDGVVWMNWK	K	G	99.7%	71.7	26.9	71.7	3.96	0	1	1	0	2	1544.7			95474.7	459	471	Empty	true
Exp1_01	Fibrinogen beta chain OS=Homo sapiens GN=FGB PE=1 SV=2	FIBB_HUMAN	swissprot_2012.fasta	55928.6	100.0%	21	27	31	0.221%	44.8%	HQLYIDETVNSNIPTNLR	K	V	99.7%	101	29.6	101	7.34	0	1	1	0	2	2127.08			50923.9	179	196	Empty	true
Exp1_01	Fibrinogen beta chain OS=Homo sapiens GN=FGB PE=1 SV=2	FIBB_HUMAN	swissprot_2012.fasta	55928.6	100.0%	21	27	31	0.221%	44.8%	KREEAPSLRPAPPPISGGGYR	K	A	99.7%	41.6	27.1	41.6	4.08	0	0	1	0	2	2235.2			9977.08	52	72	Empty	true
Exp1_01	Fibrinogen beta chain OS=Homo sapiens GN=FGB PE=1 SV=2	FIBB_HUMAN	swissprot_2012.fasta	55928.6	100.0%	21	27	31	0.221%	44.8%	MGPTELLIEMEDWK	R	G	99.7%	84.5	29.4	84.5	5.92	0	1	2	0	2	1691.8			52807.2	335	348	Empty	true
Exp1_01	Fibrinogen beta chain OS=Homo sapiens GN=FGB PE=1 SV=2	FIBB_HUMAN	swissprot_2012.fasta	55928.6	100.0%	21	27	31	0.221%	44.8%	MGPTELLIEMEDWKGDK	R	V	99.7%	64.6	29.6	51.5	2.68	0	0	1	0	2	1991.95			60872.2	335	351	Empty	true
Exp1_01	Fibrinogen beta chain OS=Homo sapiens GN=FGB PE=1 SV=2	FIBB_HUMAN	swissprot_2012.fasta	55928.6	100.0%	21	27	31	0.221%	44.8%	QDGSVDFGR	R	K	99.7%	47.6	25.0	47.6	0.000	0	1	0	0	2	9804433			55092.1	286	294	Empty	true
Exp1_01	Fibrinogen beta chain OS=Homo sapiens GN=FGB PE=1 SV=2	FIBB_HUMAN	swissprot_2012.fasta	55928.6	100.0%	21	27	31	0.221%	44.8%	QGFGNVATNTDGK	K	N	99.7%	71.2	27.9	71.2	2.66	0	2	0	0	2	1308.62			22374.4	301	313	Empty	true
Exp1_01	Fibrinogen beta chain OS=Homo sapiens GN=FGB PE=1 SV=2	FIBB_HUMAN	swissprot_2012.fasta	55928.6	100.0%	21	27	31	0.221%	44.8%	REEAPSLRPAPPPISGGGYR	K	A	99.7%	28.9	28.7	28.9	5.28	0	0	1	0	2	2107.1			19170.1	53	72	Empty	true
Exp1_01	Fibrinogen beta chain OS=Homo sapiens GN=FGB PE=1 SV=2	FIBB_HUMAN	swissprot_2012.fasta	55928.6	100.0%	21	27	31	0.221%	44.8%	TMTIHNGMFFSTYDR	R	D	98.7%	37.2	26.1	37.2	0.000	0	0	1	0	2	1821.79			11444.7	396	410	Empty	true
Exp1_01	Fibrinogen beta chain OS=Homo sapiens GN=FGB PE=1 SV=2	FIBB_HUMAN	swissprot_2012.fasta	55928.6	100.0%	21	27	31	0.221%	44.8%	TMTIHNGMFFSTYDRDNDGWLTSDPR	R	K	99.7%	39.0	27.4	39.0	3.17	0	0	1	0	2	3077.35			8181.86	396	421	Empty	true
Exp1_01	Fibrinogen beta chain OS=Homo sapiens GN=FGB PE=1 SV=2	FIBB_HUMAN	swissprot_2012.fasta	55928.6	100.0%	21	27	31	0.221%	44.8%	TMTIHNGMFFSTYDRDNDGWLTSDPRK	R	Q	97.4%	23.8	28.7	23.8	1.26	0	0	0	1	2	3205.45			17883.6	396	422	Empty	true
Exp1_01	Fibrinogen beta chain OS=Homo sapiens GN=FGB PE=1 SV=2	FIBB_HUMAN	swissprot_2012.fasta	55928.6	100.0%	21	27	31	0.221%	44.8%	VYCDMNTENGGWTVIQNR	R	Q	99.7%	43.4	26.4	43.4	10.3	0	2	2	0	2	2157.93			41168.6	268	285	Empty	true
Exp1_01	Fibrinogen beta chain OS=Homo sapiens GN=FGB PE=1 SV=2	FIBB_HUMAN	swissprot_2012.fasta	55928.6	100.0%	21	27	31	0.221%	44.8%	WDPYKQGFGNVATNTDGK	K	N	99.7%	37.0	28.7	26.1	2.43	0	0	1	0	2	1997.94			15766.1	296	313	Empty	true
Exp1_01	Fibrinogen beta chain OS=Homo sapiens GN=FGB PE=1 SV=2	FIBB_HUMAN	swissprot_2012.fasta	55928.6	100.0%	21	27	31	0.221%	44.8%	YQISVNK	K	Y	99.7%	46.6	25.0	22.1	0.000	0	1	0	0	2	8514621			76516.4	368	374	Empty	true
Exp1_01	Fibrinogen beta chain OS=Homo sapiens GN=FGB PE=1 SV=2	FIBB_HUMAN	swissprot_2012.fasta	55928.6	100.0%	21	27	31	0.221%	44.8%	YYWGGQYTWDMAK	R	H	99.7%	59.1	25.0	59.1	9.33	0	1	0	0	2	1668.72			48754.3	446	458	Empty	true
Exp1_01	Complement factor H OS=Homo sapiens GN=CFH PE=1 SV=4	CFAH_HUMAN	swissprot_2012.fasta	139096	100.0%	28	44	64	0.456%	26.4%	AQTTVTCMENGWSPTPR	K	C	99.7%	58.8	26.9	58.8	6.38	0	3	0	0	2	1936.85			85189.6	425	441	Empty	true
Exp1_01	Complement factor H OS=Homo sapiens GN=CFH PE=1 SV=4	CFAH_HUMAN	swissprot_2012.fasta	139096	100.0%	28	44	64	0.456%	26.4%	CNMGYEYSER	K	G	99.7%	32.0	25.0	32.0	1.85	0	1	0	0	2	1309.48			760876	237	246	Empty	true
Exp1_01	Complement factor H OS=Homo sapiens GN=CFH PE=1 SV=4	CFAH_HUMAN	swissprot_2012.fasta	139096	100.0%	28	44	64	0.456%	26.4%	CYFPYLENGYNQNYGR	K	K	99.7%	27.9	25.0	27.9	5.37	0	1	1	0	2	2058.86			8326.69	389	404	Empty	true
Exp1_01	Complement factor H OS=Homo sapiens GN=CFH PE=1 SV=4	CFAH_HUMAN	swissprot_2012.fasta	139096	100.0%	28	44	64	0.456%	26.4%	DTSCVNPPTVQNAYIVSR	R	Q	99.7%	44.2	29.6	32.0	4.80	0	1	0	0	2	2021.96			4697.79	1045	1062	Empty	true
Exp1_01	Complement factor H OS=Homo sapiens GN=CFH PE=1 SV=4	CFAH_HUMAN	swissprot_2012.fasta	139096	100.0%	28	44	64	0.456%	26.4%	EFDHNSNIR	K	Y	99.7%	43.6	25.9	25.3	2.37	0	1	0	0	2	1131.52			110945	770	778	Empty	true
Exp1_01	Complement factor H OS=Homo sapiens GN=CFH PE=1 SV=4	CFAH_HUMAN	swissprot_2012.fasta	139096	100.0%	28	44	64	0.456%	26.4%	EIMENYNIALR	R	W	99.7%	67.1	28.9	46.3	2.44	0	3	0	0	2	1365.68			79447.2	1172	1182	Empty	true	FHR1_HUMAN
Exp1_01	Complement factor H OS=Homo sapiens GN=CFH PE=1 SV=4	CFAH_HUMAN	swissprot_2012.fasta	139096	100.0%	28	44	64	0.456%	26.4%	EQVQSCGPPPELLNGNVK	K	E	99.7%	50.9	29.7	50.9	2.19	0	3	2	0	2	1966.95			63785.1	625	642	Empty	true
Exp1_01	Complement factor H OS=Homo sapiens GN=CFH PE=1 SV=4	CFAH_HUMAN	swissprot_2012.fasta	139096	100.0%	28	44	64	0.456%	26.4%	FVCNSGYK	R	I	97.7%	25.4	25.0	25.4	1.59	0	1	0	0	2	9754240			7898.41	176	183	Empty	true
Exp1_01	Complement factor H OS=Homo sapiens GN=CFH PE=1 SV=4	CFAH_HUMAN	swissprot_2012.fasta	139096	100.0%	28	44	64	0.456%	26.4%	GEWVALNPLR	K	K	99.7%	55.4	26.0	33.9	1.46	0	1	0	0	2	1154.63			12262.9	69	78	Empty	true
Exp1_01	Complement factor H OS=Homo sapiens GN=CFH PE=1 SV=4	CFAH_HUMAN	swissprot_2012.fasta	139096	100.0%	28	44	64	0.456%	26.4%	GKEGWIHTVCINGR	R	W	99.7%	55.5	29.2	45.4	3.44	0	1	1	0	2	1627.8			48932	783	796	Empty	true
Exp1_01	Complement factor H OS=Homo sapiens GN=CFH PE=1 SV=4	CFAH_HUMAN	swissprot_2012.fasta	139096	100.0%	28	44	64	0.456%	26.4%	HGGLYHENMR	K	R	99.7%	51.0	26.3	35.2	6.04	0	1	1	0	2	1213.55			1084910	332	341	Empty	true
Exp1_01	Complement factor H OS=Homo sapiens GN=CFH PE=1 SV=4	CFAH_HUMAN	swissprot_2012.fasta	139096	100.0%	28	44	64	0.456%	26.4%	IIYKENER	K	F	95.6%	25.2	26.7	12.4	1.42	0	1	0	0	2	1064.57			42893.2	225	232	Empty	true
Exp1_01	Complement factor H OS=Homo sapiens GN=CFH PE=1 SV=4	CFAH_HUMAN	swissprot_2012.fasta	139096	100.0%	28	44	64	0.456%	26.4%	IVSSAMEPDR	K	E	99.7%	52.9	28.8	35.2	1.37	0	1	0	0	2	1104.54			14942.3	157	166	Empty	true
Exp1_01	Complement factor H OS=Homo sapiens GN=CFH PE=1 SV=4	CFAH_HUMAN	swissprot_2012.fasta	139096	100.0%	28	44	64	0.456%	26.4%	IVSSAMEPDREYHFGQAVR	K	F	99.7%	41.3	30.1	27.8	1.74	0	0	2	0	2	2192.06			91372.7	157	175	Empty	true
Exp1_01	Complement factor H OS=Homo sapiens GN=CFH PE=1 SV=4	CFAH_HUMAN	swissprot_2012.fasta	139096	100.0%	28	44	64	0.456%	26.4%	KCYFPYLENGYNQNYGR	R	K	99.7%	28.1	26.9	28.1	5.52	0	0	2	0	2	2186.96			33116.6	388	404	Empty	true
Exp1_01	Complement factor H OS=Homo sapiens GN=CFH PE=1 SV=4	CFAH_HUMAN	swissprot_2012.fasta	139096	100.0%	28	44	64	0.456%	26.4%	KGEWVALNPLR	R	K	99.7%	52.3	25.0	52.3	3.92	0	1	2	0	2	1282.73			235485	68	78	Empty	true
Exp1_01	Complement factor H OS=Homo sapiens GN=CFH PE=1 SV=4	CFAH_HUMAN	swissprot_2012.fasta	139096	100.0%	28	44	64	0.456%	26.4%	KGEWVALNPLRK	R	C	99.7%	44.0	25.0	33.0	3.68	0	1	1	0	2	1410.82			213767	68	79	Empty	true
Exp1_01	Complement factor H OS=Homo sapiens GN=CFH PE=1 SV=4	CFAH_HUMAN	swissprot_2012.fasta	139096	100.0%	28	44	64	0.456%	26.4%	NGQWSEPPK	R	C	99.7%	54.4	25.5	42.5	3.12	0	12	0	0	2	1042.5			361747	1154	1162	Empty	true	FHR1_HUMAN
Exp1_01	Complement factor H OS=Homo sapiens GN=CFH PE=1 SV=4	CFAH_HUMAN	swissprot_2012.fasta	139096	100.0%	28	44	64	0.456%	26.4%	NTEILTGSWSDQTYPEGTQAIYK	R	C	99.7%	99.0	29.9	99.0	11.3	0	1	1	0	2	2602.23			11298.7	29	51	Empty	true
Exp1_01	Complement factor H OS=Homo sapiens GN=CFH PE=1 SV=4	CFAH_HUMAN	swissprot_2012.fasta	139096	100.0%	28	44	64	0.456%	26.4%	RNTEILTGSWSDQTYPEGTQAIYK	R	C	99.7%	50.3	30.4	31.9	5.24	0	0	1	0	2	2758.33			6287.15	28	51	Empty	true
Exp1_01	Complement factor H OS=Homo sapiens GN=CFH PE=1 SV=4	CFAH_HUMAN	swissprot_2012.fasta	139096	100.0%	28	44	64	0.456%	26.4%	SCDNPYIPNGDYSPLR	K	I	94.7%	11.9	25.7	-3.80	4.18	0	1	0	0	2	1868.81			17344.4	266	281	Empty	true
Exp1_01	Complement factor H OS=Homo sapiens GN=CFH PE=1 SV=4	CFAH_HUMAN	swissprot_2012.fasta	139096	100.0%	28	44	64	0.456%	26.4%	SIDVACHPGYALPK	K	A	95.5%	38.6	29.3	26.0	0.000	0	1	0	0	2	1570.76			6435.02	411	424	Empty	true
Exp1_01	Complement factor H OS=Homo sapiens GN=CFH PE=1 SV=4	CFAH_HUMAN	swissprot_2012.fasta	139096	100.0%	28	44	64	0.456%	26.4%	SPDVINGSPISQK	K	I	99.7%	65.3	28.1	65.3	2.60	0	2	0	0	2	1341.7			232183	212	224	Empty	true
Exp1_01	Complement factor H OS=Homo sapiens GN=CFH PE=1 SV=4	CFAH_HUMAN	swissprot_2012.fasta	139096	100.0%	28	44	64	0.456%	26.4%	SPPEISHGVVAHMSDSYQYGEEVTYK	K	C	99.7%	66.8	28.9	66.8	8.89	0	0	1	1	2	2910.33			28653.3	933	958	Empty	true
Exp1_01	Complement factor H OS=Homo sapiens GN=CFH PE=1 SV=4	CFAH_HUMAN	swissprot_2012.fasta	139096	100.0%	28	44	64	0.456%	26.4%	SSIDIENGFISESQYTYALK	K	E	99.7%	76.9	30.3	59.2	3.70	0	2	0	0	2	2265.09			58520.1	451	470	Empty	true
Exp1_01	Complement factor H OS=Homo sapiens GN=CFH PE=1 SV=4	CFAH_HUMAN	swissprot_2012.fasta	139096	100.0%	28	44	64	0.456%	26.4%	SSNLIILEEHLK	K	N	99.7%	71.5	25.0	60.2	4.39	0	2	3	0	2	1395.78			714482	755	766	Empty	true
Exp1_01	Complement factor H OS=Homo sapiens GN=CFH PE=1 SV=4	CFAH_HUMAN	swissprot_2012.fasta	139096	100.0%	28	44	64	0.456%	26.4%	SSQESYAHGTK	R	L	98.3%	23.6	26.4	11.0	2.25	0	1	0	0	2	1194.54			1490.68	886	896	Empty	true
Exp1_01	Complement factor H OS=Homo sapiens GN=CFH PE=1 SV=4	CFAH_HUMAN	swissprot_2012.fasta	139096	100.0%	28	44	64	0.456%	26.4%	TKNDFTWFK	R	L	99.7%	35.2	27.5	35.2	1.96	0	2	0	0	2	1187.57			52777.7	519	527	Empty	true
Exp1_01	Vitronectin OS=Homo sapiens GN=VTN PE=1 SV=1	VTNC_HUMAN	swissprot_2012.fasta	54306.1	100.0%	9	15	28	0.200%	19.0%	AVRPGYPK	K	L	95.9%	37.7	28.2	22.0	0.000	0	1	0	0	2	8875098			161339	187	194	Empty	true
Exp1_01	Vitronectin OS=Homo sapiens GN=VTN PE=1 SV=1	VTNC_HUMAN	swissprot_2012.fasta	54306.1	100.0%	9	15	28	0.200%	19.0%	DVWGIEGPIDAAFTR	R	I	99.7%	69.3	29.9	69.3	4.00	0	1	1	0	2	1646.82			83202.1	198	212	Empty	true
Exp1_01	Vitronectin OS=Homo sapiens GN=VTN PE=1 SV=1	VTNC_HUMAN	swissprot_2012.fasta	54306.1	100.0%	9	15	28	0.200%	19.0%	DWHGVPGQVDAAMAGR	R	I	99.7%	88.3	28.7	88.3	6.70	0	3	4	0	2	1666.78			1633090	338	353	Empty	true
Exp1_01	Vitronectin OS=Homo sapiens GN=VTN PE=1 SV=1	VTNC_HUMAN	swissprot_2012.fasta	54306.1	100.0%	9	15	28	0.200%	19.0%	DWHGVPGQVDAAMAGRIYISGMAPRPSLAK	R	K	97.7%	36.9	29.3	26.6	0.000	0	0	0	0	2	3151.59			73906.7	338	367	Empty	true
Exp1_01	Vitronectin OS=Homo sapiens GN=VTN PE=1 SV=1	VTNC_HUMAN	swissprot_2012.fasta	54306.1	100.0%	9	15	28	0.200%	19.0%	FEDGVLDPDYPR	R	N	99.7%	86.1	27.6	66.2	2.60	0	6	0	0	2	1422.65			1106210	230	241	Empty	true
Exp1_01	Vitronectin OS=Homo sapiens GN=VTN PE=1 SV=1	VTNC_HUMAN	swissprot_2012.fasta	54306.1	100.0%	9	15	28	0.200%	19.0%	IYISGMAPRPSLAK	R	K	99.7%	48.6	25.9	30.9	3.39	0	1	1	0	2	1503.84			270100	354	367	Empty	true
Exp1_01	Vitronectin OS=Homo sapiens GN=VTN PE=1 SV=1	VTNC_HUMAN	swissprot_2012.fasta	54306.1	100.0%	9	15	28	0.200%	19.0%	NGSLFAFR	K	G	99.7%	54.4	25.8	39.8	1.66	0	1	0	0	2	9124574			9267.69	169	176	Empty	true
Exp1_01	Vitronectin OS=Homo sapiens GN=VTN PE=1 SV=1	VTNC_HUMAN	swissprot_2012.fasta	54306.1	100.0%	9	15	28	0.200%	19.0%	QPQFISR	R	D	99.5%	46.4	27.8	17.2	0.000	0	3	0	0	2	8754734			1262120	331	337	Empty	true
Exp1_01	Vitronectin OS=Homo sapiens GN=VTN PE=1 SV=1	VTNC_HUMAN	swissprot_2012.fasta	54306.1	100.0%	9	15	28	0.200%	19.0%	RVDTVDPPYPR	R	S	99.7%	50.3	28.8	32.9	3.08	0	2	3	0	2	1314.68			2439480	453	463	Empty	true
Exp1_01	Clusterin OS=Homo sapiens GN=CLU PE=1 SV=1	CLUS_HUMAN	swissprot_2012.fasta	52495	100.0%	15	22	23	0.164%	32.7%	ASSIIDELFQDR	R	F	99.7%	64.5	29.6	51.9	2.74	0	1	0	0	2	1393.7			485820	183	194	Empty	true
Exp1_01	Clusterin OS=Homo sapiens GN=CLU PE=1 SV=1	CLUS_HUMAN	swissprot_2012.fasta	52495	100.0%	15	22	23	0.164%	32.7%	EILSVDCSTNNPSQAK	R	L	99.7%	59.8	28.5	45.0	4.32	0	1	0	0	2	1763.81			2752.38	307	322	Empty	true
Exp1_01	Clusterin OS=Homo sapiens GN=CLU PE=1 SV=1	CLUS_HUMAN	swissprot_2012.fasta	52495	100.0%	15	22	23	0.164%	32.7%	ELDESLQVAER	R	L	99.7%	65.8	29.3	45.2	4.80	0	2	0	0	2	1288.64			172455	326	336	Empty	true
Exp1_01	Clusterin OS=Homo sapiens GN=CLU PE=1 SV=1	CLUS_HUMAN	swissprot_2012.fasta	52495	100.0%	15	22	23	0.164%	32.7%	IDSLLENDRQQTHMLDVMQDHFSR	R	A	99.7%	45.4	30.0	45.4	0.000	0	0	0	1	2	2928.37			26936.7	159	182	Empty	true
Exp1_01	Clusterin OS=Homo sapiens GN=CLU PE=1 SV=1	CLUS_HUMAN	swissprot_2012.fasta	52495	100.0%	15	22	23	0.164%	32.7%	KKEDALNETR	K	E	99.3%	43.6	29.9	27.7	0.000	0	0	1	0	2	1203.63			13741.9	80	89	Empty	true
Exp1_01	Clusterin OS=Homo sapiens GN=CLU PE=1 SV=1	CLUS_HUMAN	swissprot_2012.fasta	52495	100.0%	15	22	23	0.164%	32.7%	KTLLSNLEEAK	R	K	99.7%	72.0	26.1	72.0	4.12	0	1	1	0	2	1245.7			61986.7	68	78	Empty	true
Exp1_01	Clusterin OS=Homo sapiens GN=CLU PE=1 SV=1	CLUS_HUMAN	swissprot_2012.fasta	52495	100.0%	15	22	23	0.164%	32.7%	KTLLSNLEEAKK	R	K	99.7%	70.9	25.0	57.4	1.70	0	0	1	0	2	1373.8			27663.6	68	79	Empty	true
Exp1_01	Clusterin OS=Homo sapiens GN=CLU PE=1 SV=1	CLUS_HUMAN	swissprot_2012.fasta	52495	100.0%	15	22	23	0.164%	32.7%	KYNELLK	R	S	99.7%	46.8	25.0	17.8	1.46	0	2	0	0	2	9085089			42209.4	340	346	Empty	true
Exp1_01	Clusterin OS=Homo sapiens GN=CLU PE=1 SV=1	CLUS_HUMAN	swissprot_2012.fasta	52495	100.0%	15	22	23	0.164%	32.7%	LFDSDPITVTVPVEVSR	K	K	99.7%	81.2	29.0	69.8	5.80	0	1	1	0	2	1873.99			77295.3	409	425	Empty	true
Exp1_01	Clusterin OS=Homo sapiens GN=CLU PE=1 SV=1	CLUS_HUMAN	swissprot_2012.fasta	52495	100.0%	15	22	23	0.164%	32.7%	QQTHMLDVMQDHFSR	R	A	99.7%	55.6	27.5	55.6	3.04	0	0	1	1	2	1872.85			311066	168	182	Empty	true
Exp1_01	Clusterin OS=Homo sapiens GN=CLU PE=1 SV=1	CLUS_HUMAN	swissprot_2012.fasta	52495	100.0%	15	22	23	0.164%	32.7%	RELDESLQVAER	R	L	98.4%	43.3	29.9	33.1	0.000	0	1	0	0	2	1444.74			4534.58	325	336	Empty	true
Exp1_01	Clusterin OS=Homo sapiens GN=CLU PE=1 SV=1	CLUS_HUMAN	swissprot_2012.fasta	52495	100.0%	15	22	23	0.164%	32.7%	TLLSNLEEAK	K	K	99.7%	70.2	28.7	54.9	2.96	0	1	0	0	2	1117.61			93321.8	69	78	Empty	true
Exp1_01	Clusterin OS=Homo sapiens GN=CLU PE=1 SV=1	CLUS_HUMAN	swissprot_2012.fasta	52495	100.0%	15	22	23	0.164%	32.7%	TLLSNLEEAKK	K	K	99.7%	44.7	26.5	33.4	1.55	0	1	0	0	2	1245.7			12055.7	69	79	Empty	true
Exp1_01	Clusterin OS=Homo sapiens GN=CLU PE=1 SV=1	CLUS_HUMAN	swissprot_2012.fasta	52495	100.0%	15	22	23	0.164%	32.7%	VTTVASHTSDSDVPSGVTEVVVK	R	L	99.7%	77.3	29.5	77.3	7.05	0	1	1	0	2	2314.18			34501.6	386	408	Empty	true
Exp1_01	Clusterin OS=Homo sapiens GN=CLU PE=1 SV=1	CLUS_HUMAN	swissprot_2012.fasta	52495	100.0%	15	22	23	0.164%	32.7%	YVNKEIQNAVNGVK	K	Q	99.7%	90.0	28.6	70.9	3.92	0	2	1	0	2	1575.85			21130.4	41	54	Empty	true
Exp1_01	Fibrinogen alpha chain OS=Homo sapiens GN=FGA PE=1 SV=2	FIBA_HUMAN	swissprot_2012.fasta	94973.4	100.0%	26	45	49	0.349%	29.9%	ALTDMPQMR	K	M	99.3%	30.6	28.3	30.6	2.92	0	1	0	0	2	1062.51			150334	250	258	Empty	true
Exp1_01	Fibrinogen alpha chain OS=Homo sapiens GN=FGA PE=1 SV=2	FIBA_HUMAN	swissprot_2012.fasta	94973.4	100.0%	26	45	49	0.349%	29.9%	DSHSLTTNIMEILR	K	G	99.7%	78.1	30.0	78.1	7.09	0	1	1	0	2	1629.83			69692.7	101	114	Empty	true
Exp1_01	Fibrinogen alpha chain OS=Homo sapiens GN=FGA PE=1 SV=2	FIBA_HUMAN	swissprot_2012.fasta	94973.4	100.0%	26	45	49	0.349%	29.9%	ESSSHHPGIAEFPSR	K	G	99.7%	61.4	29.0	44.9	1.70	0	1	1	0	2	1637.77			174322	559	573	Empty	true
Exp1_01	Fibrinogen alpha chain OS=Homo sapiens GN=FGA PE=1 SV=2	FIBA_HUMAN	swissprot_2012.fasta	94973.4	100.0%	26	45	49	0.349%	29.9%	EVDLKDYEDQQK	R	Q	99.7%	76.5	28.2	65.4	3.92	0	1	0	0	2	1509.71			9197.56	191	202	Empty	true
Exp1_01	Fibrinogen alpha chain OS=Homo sapiens GN=FGA PE=1 SV=2	FIBA_HUMAN	swissprot_2012.fasta	94973.4	100.0%	26	45	49	0.349%	29.9%	EVDLKDYEDQQKQLEQVIAK	R	D	99.7%	57.0	29.6	57.0	2.09	0	0	1	0	2	2419.24			14707.1	191	210	Empty	true
Exp1_01	Fibrinogen alpha chain OS=Homo sapiens GN=FGA PE=1 SV=2	FIBA_HUMAN	swissprot_2012.fasta	94973.4	100.0%	26	45	49	0.349%	29.9%	GDFSSANNR	R	D	99.7%	38.4	25.0	38.4	2.74	0	1	0	0	2	9674227			12216.9	115	123	Empty	true
Exp1_01	Fibrinogen alpha chain OS=Homo sapiens GN=FGA PE=1 SV=2	FIBA_HUMAN	swissprot_2012.fasta	94973.4	100.0%	26	45	49	0.349%	29.9%	GGSTSYGTGSETESPR	R	N	99.7%	77.0	25.0	77.0	5.85	0	1	0	0	2	1572.68			6994.53	272	287	Empty	true
Exp1_01	Fibrinogen alpha chain OS=Homo sapiens GN=FGA PE=1 SV=2	FIBA_HUMAN	swissprot_2012.fasta	94973.4	100.0%	26	45	49	0.349%	29.9%	GGSTSYGTGSETESPRNPSSAGSWNSGSSGPGSTGNR	R	N	99.7%	69.4	25.0	69.4	7.34	0	0	1	0	2	3517.51			5006.66	272	308	Empty	true
Exp1_01	Fibrinogen alpha chain OS=Homo sapiens GN=FGA PE=1 SV=2	FIBA_HUMAN	swissprot_2012.fasta	94973.4	100.0%	26	45	49	0.349%	29.9%	GLIDEVNQDFTNR	K	I	99.7%	78.3	29.7	62.8	4.28	0	1	1	0	2	1520.73			22970.2	72	84	Empty	true
Exp1_01	Fibrinogen alpha chain OS=Homo sapiens GN=FGA PE=1 SV=2	FIBA_HUMAN	swissprot_2012.fasta	94973.4	100.0%	26	45	49	0.349%	29.9%	GSESGIFTNTK	R	E	99.7%	76.2	27.7	62.0	3.31	0	2	0	0	2	1140.55			60984.4	548	558	Empty	true
Exp1_01	Fibrinogen alpha chain OS=Homo sapiens GN=FGA PE=1 SV=2	FIBA_HUMAN	swissprot_2012.fasta	94973.4	100.0%	26	45	49	0.349%	29.9%	HPDEAAFFDTASTGK	R	T	99.7%	94.6	27.2	94.6	6.00	0	1	1	0	2	1593.72			38099.7	513	527	Empty	true
Exp1_01	Fibrinogen alpha chain OS=Homo sapiens GN=FGA PE=1 SV=2	FIBA_HUMAN	swissprot_2012.fasta	94973.4	100.0%	26	45	49	0.349%	29.9%	HRHPDEAAFFDTASTGK	R	T	99.7%	81.4	28.5	70.2	6.77	0	1	1	0	2	1886.88			183767	511	527	Empty	true
Exp1_01	Fibrinogen alpha chain OS=Homo sapiens GN=FGA PE=1 SV=2	FIBA_HUMAN	swissprot_2012.fasta	94973.4	100.0%	26	45	49	0.349%	29.9%	LKNSLFEYQK	K	N	99.7%	44.5	27.5	23.9	1.57	0	1	0	0	2	1269.68			954224	88	97	Empty	true
Exp1_01	Fibrinogen alpha chain OS=Homo sapiens GN=FGA PE=1 SV=2	FIBA_HUMAN	swissprot_2012.fasta	94973.4	100.0%	26	45	49	0.349%	29.9%	MADEAGSEADHEGTHSTK	K	R	99.7%	87.8	25.0	87.8	4.17	0	2	2	3	2	1872.77			221931	603	620	Empty	true
Exp1_01	Fibrinogen alpha chain OS=Homo sapiens GN=FGA PE=1 SV=2	FIBA_HUMAN	swissprot_2012.fasta	94973.4	100.0%	26	45	49	0.349%	29.9%	MADEAGSEADHEGTHSTKR	K	G	99.7%	82.0	25.0	70.1	7.15	0	1	1	3	2	2028.87			297399	603	621	Empty	true
Exp1_01	Fibrinogen alpha chain OS=Homo sapiens GN=FGA PE=1 SV=2	FIBA_HUMAN	swissprot_2012.fasta	94973.4	100.0%	26	45	49	0.349%	29.9%	MELERPGGNEITR	R	G	98.6%	28.7	29.4	8.44	1.11	0	0	1	0	2	1501.74			318917	259	271	Empty	true
Exp1_01	Fibrinogen alpha chain OS=Homo sapiens GN=FGA PE=1 SV=2	FIBA_HUMAN	swissprot_2012.fasta	94973.4	100.0%	26	45	49	0.349%	29.9%	MKGLIDEVNQDFTNR	R	I	99.7%	49.2	29.7	49.2	3.21	0	0	1	0	2	1779.87			21166.7	70	84	Empty	true
Exp1_01	Fibrinogen alpha chain OS=Homo sapiens GN=FGA PE=1 SV=2	FIBA_HUMAN	swissprot_2012.fasta	94973.4	100.0%	26	45	49	0.349%	29.9%	MKPVPDLVPGNFK	K	S	99.7%	32.0	27.5	14.1	1.19	0	2	1	0	2	1441.79			309287	226	238	Empty	true
Exp1_01	Fibrinogen alpha chain OS=Homo sapiens GN=FGA PE=1 SV=2	FIBA_HUMAN	swissprot_2012.fasta	94973.4	100.0%	26	45	49	0.349%	29.9%	NNKDSHSLTTNIMEILR	K	G	99.7%	44.5	29.7	44.5	1.17	0	0	1	0	2	1986.01			15024	98	114	Empty	true
Exp1_01	Fibrinogen alpha chain OS=Homo sapiens GN=FGA PE=1 SV=2	FIBA_HUMAN	swissprot_2012.fasta	94973.4	100.0%	26	45	49	0.349%	29.9%	NPSSAGSWNSGSSGPGSTGNR	R	N	99.7%	114	25.9	114	11.0	0	3	2	0	2	1963.85			19200.9	288	308	Empty	true
Exp1_01	Fibrinogen alpha chain OS=Homo sapiens GN=FGA PE=1 SV=2	FIBA_HUMAN	swissprot_2012.fasta	94973.4	100.0%	26	45	49	0.349%	29.9%	NSLFEYQK	K	N	99.7%	33.8	26.0	33.8	3.92	0	1	0	0	2	1028.5			32635.6	90	97	Empty	true
Exp1_01	Fibrinogen alpha chain OS=Homo sapiens GN=FGA PE=1 SV=2	FIBA_HUMAN	swissprot_2012.fasta	94973.4	100.0%	26	45	49	0.349%	29.9%	QFTSSTSYNR	K	G	99.6%	46.4	27.5	46.4	0.000	0	1	0	0	2	1190.54			57085.1	582	591	Empty	true
Exp1_01	Fibrinogen alpha chain OS=Homo sapiens GN=FGA PE=1 SV=2	FIBA_HUMAN	swissprot_2012.fasta	94973.4	100.0%	26	45	49	0.349%	29.9%	QFTSSTSYNRGDSTFESK	K	S	99.7%	43.8	27.1	43.8	3.72	0	1	0	0	2	2041.91			2066.18	582	599	Empty	true
Exp1_01	Fibrinogen alpha chain OS=Homo sapiens GN=FGA PE=1 SV=2	FIBA_HUMAN	swissprot_2012.fasta	94973.4	100.0%	26	45	49	0.349%	29.9%	QHLPLIK	R	M	99.1%	28.3	25.0	0.000	2.17	0	1	0	0	2	8485354			35699.5	219	225	Empty	true
Exp1_01	Fibrinogen alpha chain OS=Homo sapiens GN=FGA PE=1 SV=2	FIBA_HUMAN	swissprot_2012.fasta	94973.4	100.0%	26	45	49	0.349%	29.9%	TFPGFFSPMLGEFVSETESR	K	G	99.7%	89.4	29.4	89.4	7.10	0	1	1	0	2	2265.05			49151.6	528	547	Empty	true
Exp1_01	Fibrinogen alpha chain OS=Homo sapiens GN=FGA PE=1 SV=2	FIBA_HUMAN	swissprot_2012.fasta	94973.4	100.0%	26	45	49	0.349%	29.9%	VQHIQLLQK	K	N	98.5%	38.6	25.0	38.6	0.000	0	1	0	0	2	1106.67			49140.4	149	157	Empty	true
Exp1_01	Apolipoprotein C-III OS=Homo sapiens GN=APOC3 PE=1 SV=1	APOC3_HUMAN	swissprot_2012.fasta	10852.3	100.0%	7	10	20	0.143%	58.6%	DALSSVQESQVAQQAR	K	G	99.7%	113	29.8	93.8	6.21	0	5	4	0	2	1716.85			830905	45	60	Empty	true
Exp1_01	Apolipoprotein C-III OS=Homo sapiens GN=APOC3 PE=1 SV=1	APOC3_HUMAN	swissprot_2012.fasta	10852.3	100.0%	7	10	20	0.143%	58.6%	DKFSEFWDLDPEVRPTSAVAA	K	-	99.7%	53.2	29.9	53.2	5.17	0	1	0	0	2	2380.15			63400.2	79	99	Empty	true
Exp1_01	Apolipoprotein C-III OS=Homo sapiens GN=APOC3 PE=1 SV=1	APOC3_HUMAN	swissprot_2012.fasta	10852.3	100.0%	7	10	20	0.143%	58.6%	DYWSTVKDK	K	F	97.5%	26.8	26.6	26.8	1.42	0	1	0	0	2	1141.55			27772	72	80	Empty	true
Exp1_01	Apolipoprotein C-III OS=Homo sapiens GN=APOC3 PE=1 SV=1	APOC3_HUMAN	swissprot_2012.fasta	10852.3	100.0%	7	10	20	0.143%	58.6%	FSEFWDLDPEVRPTSAVAA	K	-	99.7%	53.8	29.8	53.8	3.89	0	1	0	0	2	2137.02			60624	81	99	Empty	true
Exp1_01	Apolipoprotein C-III OS=Homo sapiens GN=APOC3 PE=1 SV=1	APOC3_HUMAN	swissprot_2012.fasta	10852.3	100.0%	7	10	20	0.143%	58.6%	GWVTDGFSSLK	R	D	99.7%	74.6	28.2	56.8	2.85	0	3	0	0	2	1196.59			869939	61	71	Empty	true
Exp1_01	Apolipoprotein C-III OS=Homo sapiens GN=APOC3 PE=1 SV=1	APOC3_HUMAN	swissprot_2012.fasta	10852.3	100.0%	7	10	20	0.143%	58.6%	GWVTDGFSSLKDYWSTVK	R	D	99.7%	97.0	30.0	97.0	7.40	0	2	2	0	2	2076.01			866631	61	78	Empty	true
Exp1_01	Apolipoprotein C-III OS=Homo sapiens GN=APOC3 PE=1 SV=1	APOC3_HUMAN	swissprot_2012.fasta	10852.3	100.0%	7	10	20	0.143%	58.6%	TAKDALSSVQESQVAQQAR	K	G	96.2%	67.2	29.9	4.29	4.59	0	1	0	0	2	2060.03			4497.71	42	60	Empty	true
Exp1_01	Inter-alpha-trypsin inhibitor heavy chain H2 OS=Homo sapiens GN=ITIH2 PE=1 SV=2	ITIH2_HUMAN	swissprot_2012.fasta	106466	100.0%	26	41	44	0.314%	33.8%	AEDHFSVIDFNQNIR	R	T	99.7%	39.1	29.5	22.6	2.49	0	0	1	0	2	1804.86			55526.8	342	356	Empty	true
Exp1_01	Inter-alpha-trypsin inhibitor heavy chain H2 OS=Homo sapiens GN=ITIH2 PE=1 SV=2	ITIH2_HUMAN	swissprot_2012.fasta	106466	100.0%	26	41	44	0.314%	33.8%	AGELEVFNGYFVHFFAPDNLDPIPK	K	N	99.7%	54.4	30.0	54.4	5.07	0	0	2	0	2	2836.4			14951.6	285	309	Empty	true
Exp1_01	Inter-alpha-trypsin inhibitor heavy chain H2 OS=Homo sapiens GN=ITIH2 PE=1 SV=2	ITIH2_HUMAN	swissprot_2012.fasta	106466	100.0%	26	41	44	0.314%	33.8%	AHVSFKPTVAQQR	K	I	99.7%	52.5	27.2	52.5	0.000	0	1	1	0	2	1468.8			156205	247	259	Empty	true
Exp1_01	Inter-alpha-trypsin inhibitor heavy chain H2 OS=Homo sapiens GN=ITIH2 PE=1 SV=2	ITIH2_HUMAN	swissprot_2012.fasta	106466	100.0%	26	41	44	0.314%	33.8%	ETAVDGELVVLYDVK	R	R	99.7%	59.7	28.5	59.7	2.60	0	1	0	0	2	1649.86			15612.6	266	280	Empty	true
Exp1_01	Inter-alpha-trypsin inhibitor heavy chain H2 OS=Homo sapiens GN=ITIH2 PE=1 SV=2	ITIH2_HUMAN	swissprot_2012.fasta	106466	100.0%	26	41	44	0.314%	33.8%	FLHVPDTFEGHFDGVPVISK	R	G	99.7%	72.6	29.8	72.6	7.72	0	1	1	2	2	2241.13			131845	223	242	Empty	true
Exp1_01	Inter-alpha-trypsin inhibitor heavy chain H2 OS=Homo sapiens GN=ITIH2 PE=1 SV=2	ITIH2_HUMAN	swissprot_2012.fasta	106466	100.0%	26	41	44	0.314%	33.8%	FYNQVSTPLLR	K	N	99.7%	39.7	27.4	39.7	2.12	0	1	0	0	2	1337.72			9106.53	489	499	Empty	true
Exp1_01	Inter-alpha-trypsin inhibitor heavy chain H2 OS=Homo sapiens GN=ITIH2 PE=1 SV=2	ITIH2_HUMAN	swissprot_2012.fasta	106466	100.0%	26	41	44	0.314%	33.8%	HADPDFTR	K	K	99.2%	28.7	25.0	28.7	2.48	0	1	0	0	2	9584378			16464.7	574	581	Empty	true
Exp1_01	Inter-alpha-trypsin inhibitor heavy chain H2 OS=Homo sapiens GN=ITIH2 PE=1 SV=2	ITIH2_HUMAN	swissprot_2012.fasta	106466	100.0%	26	41	44	0.314%	33.8%	HLEVDVWVIEPQGLR	K	F	99.7%	92.4	27.6	80.2	6.96	0	1	1	0	2	1789.96			88985.2	208	222	Empty	true
Exp1_01	Inter-alpha-trypsin inhibitor heavy chain H2 OS=Homo sapiens GN=ITIH2 PE=1 SV=2	ITIH2_HUMAN	swissprot_2012.fasta	106466	100.0%	26	41	44	0.314%	33.8%	IYGNQDTSSQLK	R	K	99.7%	48.6	28.5	34.9	1.41	0	1	0	0	2	1353.66			7204.6	476	487	Empty	true
Exp1_01	Inter-alpha-trypsin inhibitor heavy chain H2 OS=Homo sapiens GN=ITIH2 PE=1 SV=2	ITIH2_HUMAN	swissprot_2012.fasta	106466	100.0%	26	41	44	0.314%	33.8%	IYGNQDTSSQLKK	R	F	99.7%	40.2	28.8	20.9	2.29	0	1	2	0	2	1481.76			28762	476	488	Empty	true
Exp1_01	Inter-alpha-trypsin inhibitor heavy chain H2 OS=Homo sapiens GN=ITIH2 PE=1 SV=2	ITIH2_HUMAN	swissprot_2012.fasta	106466	100.0%	26	41	44	0.314%	33.8%	KLGSYEHR	R	I	99.7%	56.8	29.9	43.9	2.19	0	1	0	0	2	9895163			22014.5	190	197	Empty	true
Exp1_01	Inter-alpha-trypsin inhibitor heavy chain H2 OS=Homo sapiens GN=ITIH2 PE=1 SV=2	ITIH2_HUMAN	swissprot_2012.fasta	106466	100.0%	26	41	44	0.314%	33.8%	KLWAYLTINQLLAER	R	S	99.7%	132	25.0	121	4.77	0	1	1	0	2	1832.04			219333	582	596	Empty	true
Exp1_01	Inter-alpha-trypsin inhibitor heavy chain H2 OS=Homo sapiens GN=ITIH2 PE=1 SV=2	ITIH2_HUMAN	swissprot_2012.fasta	106466	100.0%	26	41	44	0.314%	33.8%	LGSYEHR	K	I	98.0%	39.5	27.0	28.1	0.000	0	1	0	0	2	8614213			24045.5	191	197	Empty	true
Exp1_01	Inter-alpha-trypsin inhibitor heavy chain H2 OS=Homo sapiens GN=ITIH2 PE=1 SV=2	ITIH2_HUMAN	swissprot_2012.fasta	106466	100.0%	26	41	44	0.314%	33.8%	LSNENHGIAQR	R	I	99.7%	62.9	28.0	62.9	3.46	0	1	0	0	2	1238.62			8508.02	465	475	Empty	true
Exp1_01	Inter-alpha-trypsin inhibitor heavy chain H2 OS=Homo sapiens GN=ITIH2 PE=1 SV=2	ITIH2_HUMAN	swissprot_2012.fasta	106466	100.0%	26	41	44	0.314%	33.8%	LWAYLTINQLLAER	K	S	99.7%	91.4	25.5	79.2	4.00	0	1	0	0	2	1703.95			2269.58	583	596	Empty	true
Exp1_01	Inter-alpha-trypsin inhibitor heavy chain H2 OS=Homo sapiens GN=ITIH2 PE=1 SV=2	ITIH2_HUMAN	swissprot_2012.fasta	106466	100.0%	26	41	44	0.314%	33.8%	MATTMIQSK	R	V	99.6%	32.2	26.4	20.8	1.46	0	2	0	0	2	1026.5			9487.14	85	93	Empty	true
Exp1_01	Inter-alpha-trypsin inhibitor heavy chain H2 OS=Homo sapiens GN=ITIH2 PE=1 SV=2	ITIH2_HUMAN	swissprot_2012.fasta	106466	100.0%	26	41	44	0.314%	33.8%	MKQTVEAMK	K	T	99.7%	55.7	28.3	38.1	1.25	0	1	0	0	2	1065.54			23427	326	334	Empty	true
Exp1_01	Inter-alpha-trypsin inhibitor heavy chain H2 OS=Homo sapiens GN=ITIH2 PE=1 SV=2	ITIH2_HUMAN	swissprot_2012.fasta	106466	100.0%	26	41	44	0.314%	33.8%	NILFVIDVSGSMWGVK	K	M	99.7%	95.1	28.9	82.3	4.80	0	1	0	0	2	1764.94			3206.12	310	325	Empty	true
Exp1_01	Inter-alpha-trypsin inhibitor heavy chain H2 OS=Homo sapiens GN=ITIH2 PE=1 SV=2	ITIH2_HUMAN	swissprot_2012.fasta	106466	100.0%	26	41	44	0.314%	33.8%	NVQFNYPHTSVTDVTQNNFHNYFGGSEIVVAGK	R	F	99.7%	93.1	29.7	76.3	5.77	0	0	1	1	2	3683.75			15544.5	500	532	Empty	true
Exp1_01	Inter-alpha-trypsin inhibitor heavy chain H2 OS=Homo sapiens GN=ITIH2 PE=1 SV=2	ITIH2_HUMAN	swissprot_2012.fasta	106466	100.0%	26	41	44	0.314%	33.8%	RLSNENHGIAQR	K	I	99.7%	49.0	28.9	36.0	1.89	0	1	1	0	2	1394.72			40864.4	464	475	Empty	true
Exp1_01	Inter-alpha-trypsin inhibitor heavy chain H2 OS=Homo sapiens GN=ITIH2 PE=1 SV=2	ITIH2_HUMAN	swissprot_2012.fasta	106466	100.0%	26	41	44	0.314%	33.8%	SILQMSLDHHIVTPLTSLVIENEAGDER	R	M	99.7%	96.4	28.7	85.9	7.96	0	0	1	1	2	3117.59			224955	611	638	Empty	true
Exp1_01	Inter-alpha-trypsin inhibitor heavy chain H2 OS=Homo sapiens GN=ITIH2 PE=1 SV=2	ITIH2_HUMAN	swissprot_2012.fasta	106466	100.0%	26	41	44	0.314%	33.8%	SSALDMENFR	R	T	99.7%	46.1	25.4	32.7	1.47	0	1	0	0	2	1169.53			364377	157	166	Empty	true
Exp1_01	Inter-alpha-trypsin inhibitor heavy chain H2 OS=Homo sapiens GN=ITIH2 PE=1 SV=2	ITIH2_HUMAN	swissprot_2012.fasta	106466	100.0%	26	41	44	0.314%	33.8%	TILDDLRAEDHFSVIDFNQNIR	K	T	99.7%	62.1	30.1	43.7	5.23	0	0	1	0	2	2631.32			314717	335	356	Empty	true
Exp1_01	Inter-alpha-trypsin inhibitor heavy chain H2 OS=Homo sapiens GN=ITIH2 PE=1 SV=2	ITIH2_HUMAN	swissprot_2012.fasta	106466	100.0%	26	41	44	0.314%	33.8%	VQFELHYQEVK	K	W	99.7%	76.9	30.0	44.0	2.92	0	1	1	0	2	1419.73			110380	177	187	Empty	true
Exp1_01	Inter-alpha-trypsin inhibitor heavy chain H2 OS=Homo sapiens GN=ITIH2 PE=1 SV=2	ITIH2_HUMAN	swissprot_2012.fasta	106466	100.0%	26	41	44	0.314%	33.8%	VQSTITSR	K	M	99.7%	47.4	26.7	33.2	0.000	0	1	0	0	2	8914894			55038.6	77	84	Empty	true
Exp1_01	Inter-alpha-trypsin inhibitor heavy chain H2 OS=Homo sapiens GN=ITIH2 PE=1 SV=2	ITIH2_HUMAN	swissprot_2012.fasta	106466	100.0%	26	41	44	0.314%	33.8%	VVNNSPQPQNVVFDVQIPK	K	G	99.7%	66.1	27.9	51.0	3.27	0	3	2	0	2	2122.13			33851.7	94	112	Empty	true
Exp1_01	Ig mu chain C region OS=Homo sapiens GN=IGHM PE=1 SV=3	IGHM_HUMAN	swissprot_2012.fasta	49305.7	100.0%	17	26	66	0.470%	40.0%	DGFFGNPR	R	K	99.0%	41.6	26.0	26.2	0.000	0	2	0	0	2	9094214			556347	121	128	Empty	true
Exp1_01	Ig mu chain C region OS=Homo sapiens GN=IGHM PE=1 SV=3	IGHM_HUMAN	swissprot_2012.fasta	49305.7	100.0%	17	26	66	0.470%	40.0%	EGKQVGSGVTTDQVQAEAK	R	E	99.7%	39.6	30.0	39.6	3.17	0	0	2	0	2	1931.97			19295.9	151	169	Empty	true
Exp1_01	Ig mu chain C region OS=Homo sapiens GN=IGHM PE=1 SV=3	IGHM_HUMAN	swissprot_2012.fasta	49305.7	100.0%	17	26	66	0.470%	40.0%	EKNVPLPVIAELPPK	K	V	99.7%	42.4	25.0	42.4	2.62	0	0	4	0	2	1643.97			31715.6	98	112	Empty	true
Exp1_01	Ig mu chain C region OS=Homo sapiens GN=IGHM PE=1 SV=3	IGHM_HUMAN	swissprot_2012.fasta	49305.7	100.0%	17	26	66	0.470%	40.0%	ESGPTTYK	K	V	99.7%	46.3	25.3	10.1	0.000	0	1	0	0	2	8824204			54419.6	170	177	Empty	true
Exp1_01	Ig mu chain C region OS=Homo sapiens GN=IGHM PE=1 SV=3	IGHM_HUMAN	swissprot_2012.fasta	49305.7	100.0%	17	26	66	0.470%	40.0%	FTCTVTHTDLPSPLK	R	Q	99.7%	67.3	29.9	67.3	0.000	0	1	0	0	2	1759.86			27503.2	301	315	Empty	true
Exp1_01	Ig mu chain C region OS=Homo sapiens GN=IGHM PE=1 SV=3	IGHM_HUMAN	swissprot_2012.fasta	49305.7	100.0%	17	26	66	0.470%	40.0%	GQPLSPEK	R	Y	95.4%	34.1	25.0	22.3	0.000	0	1	0	0	2	8554572			95177.9	369	376	Empty	true
Exp1_01	Ig mu chain C region OS=Homo sapiens GN=IGHM PE=1 SV=3	IGHM_HUMAN	swissprot_2012.fasta	49305.7	100.0%	17	26	66	0.470%	40.0%	GVALHRPDVYLLPPAR	K	E	99.7%	49.8	25.0	30.6	3.31	0	2	5	0	2	1774.01			2312350	323	338	Empty	true
Exp1_01	Ig mu chain C region OS=Homo sapiens GN=IGHM PE=1 SV=3	IGHM_HUMAN	swissprot_2012.fasta	49305.7	100.0%	17	26	66	0.470%	40.0%	NVPLPVIAELPPK	K	V	99.7%	77.1	25.0	77.1	4.57	0	7	5	0	2	1386.84			316581	100	112	Empty	true
Exp1_01	Ig mu chain C region OS=Homo sapiens GN=IGHM PE=1 SV=3	IGHM_HUMAN	swissprot_2012.fasta	49305.7	100.0%	17	26	66	0.470%	40.0%	QIQVSWLR	R	E	99.0%	44.7	29.2	26.8	0.000	0	1	0	0	2	1029.58			100215	143	150	Empty	true
Exp1_01	Ig mu chain C region OS=Homo sapiens GN=IGHM PE=1 SV=3	IGHM_HUMAN	swissprot_2012.fasta	49305.7	100.0%	17	26	66	0.470%	40.0%	QVGSGVTTDQVQAEAK	K	E	99.7%	111	29.8	98.2	4.64	0	8	1	0	2	1617.81			502585	154	169	Empty	true
Exp1_01	Ig mu chain C region OS=Homo sapiens GN=IGHM PE=1 SV=3	IGHM_HUMAN	swissprot_2012.fasta	49305.7	100.0%	17	26	66	0.470%	40.0%	SKLICQATGFSPR	K	Q	98.7%	43.2	29.1	43.2	0.000	0	1	0	0	2	1507.76			15017.5	130	142	Empty	true
Exp1_01	Ig mu chain C region OS=Homo sapiens GN=IGHM PE=1 SV=3	IGHM_HUMAN	swissprot_2012.fasta	49305.7	100.0%	17	26	66	0.470%	40.0%	VFAIPPSFASIFLTK	R	S	99.7%	119	25.0	105	6.44	0	3	2	0	2	1637.93			1510070	224	238	Empty	true
Exp1_01	Ig mu chain C region OS=Homo sapiens GN=IGHM PE=1 SV=3	IGHM_HUMAN	swissprot_2012.fasta	49305.7	100.0%	17	26	66	0.470%	40.0%	VSVFVPPR	K	D	99.7%	44.8	28.7	24.5	1.59	0	5	0	0	2	9005301			1634820	113	120	Empty	true
Exp1_01	Ig mu chain C region OS=Homo sapiens GN=IGHM PE=1 SV=3	IGHM_HUMAN	swissprot_2012.fasta	49305.7	100.0%	17	26	66	0.470%	40.0%	VTSTLTIK	K	E	99.7%	33.5	25.0	33.5	2.11	0	1	0	0	2	8625245			780739	178	185	Empty	true
Exp1_01	Ig mu chain C region OS=Homo sapiens GN=IGHM PE=1 SV=3	IGHM_HUMAN	swissprot_2012.fasta	49305.7	100.0%	17	26	66	0.470%	40.0%	YAATSQVLLPSK	K	D	99.7%	94.1	26.7	78.4	4.92	0	3	0	0	2	1277.71			577353	65	76	Empty	true
Exp1_01	Ig mu chain C region OS=Homo sapiens GN=IGHM PE=1 SV=3	IGHM_HUMAN	swissprot_2012.fasta	49305.7	100.0%	17	26	66	0.470%	40.0%	YAATSQVLLPSKDVMQGTDEHVVCK	K	V	99.3%	29.2	30.4	29.2	1.04	0	0	0	1	2	2777.35			15089.2	65	89	Empty	true
Exp1_01	Ig mu chain C region OS=Homo sapiens GN=IGHM PE=1 SV=3	IGHM_HUMAN	swissprot_2012.fasta	49305.7	100.0%	17	26	66	0.470%	40.0%	YVTSAPMPEPQAPGR	K	Y	99.7%	96.5	29.0	85.0	4.82	0	8	2	0	2	1600.78			1431600	377	391	Empty	true
Exp1_01	Inter-alpha-trypsin inhibitor heavy chain H3 OS=Homo sapiens GN=ITIH3 PE=1 SV=2	ITIH3_HUMAN	swissprot_2012.fasta	99850.9	100.0%	16	19	22	0.157%	25.7%	DYIFGNYIER	R	L	99.7%	55.0	28.3	40.1	3.17	0	1	0	0	2	1289.62			48384.4	547	556	Empty	true
Exp1_01	Inter-alpha-trypsin inhibitor heavy chain H3 OS=Homo sapiens GN=ITIH3 PE=1 SV=2	ITIH3_HUMAN	swissprot_2012.fasta	99850.9	100.0%	16	19	22	0.157%	25.7%	EHLVQATPENLQEAR	K	T	99.7%	68.4	30.2	68.4	8.70	0	1	0	0	2	1734.88			5024.7	334	348	Empty	true
Exp1_01	Inter-alpha-trypsin inhibitor heavy chain H3 OS=Homo sapiens GN=ITIH3 PE=1 SV=2	ITIH3_HUMAN	swissprot_2012.fasta	99850.9	100.0%	16	19	22	0.157%	25.7%	ESPGNVQIVNGYFVHFFAPQGLPVVPK	R	N	99.7%	35.6	27.8	35.6	4.38	0	0	1	0	2	2940.54			21620.5	257	283	Empty	true
Exp1_01	Inter-alpha-trypsin inhibitor heavy chain H3 OS=Homo sapiens GN=ITIH3 PE=1 SV=2	ITIH3_HUMAN	swissprot_2012.fasta	99850.9	100.0%	16	19	22	0.157%	25.7%	EVSFDVELPK	K	T	99.7%	43.4	29.8	31.6	2.21	0	1	0	0	2	1162.6			28622.9	76	85	Empty	true
Exp1_01	Inter-alpha-trypsin inhibitor heavy chain H3 OS=Homo sapiens GN=ITIH3 PE=1 SV=2	ITIH3_HUMAN	swissprot_2012.fasta	99850.9	100.0%	16	19	22	0.157%	25.7%	FTVSVNVAAGSK	K	V	99.7%	48.1	27.2	48.1	2.68	0	1	0	0	2	1179.64			4255.11	138	149	Empty	true
Exp1_01	Inter-alpha-trypsin inhibitor heavy chain H3 OS=Homo sapiens GN=ITIH3 PE=1 SV=2	ITIH3_HUMAN	swissprot_2012.fasta	99850.9	100.0%	16	19	22	0.157%	25.7%	GHGATNDLTFTEEVDMK	K	E	99.7%	31.9	27.8	31.9	1.55	0	0	1	0	2	1864.84			9775.89	521	537	Empty	true
Exp1_01	Inter-alpha-trypsin inhibitor heavy chain H3 OS=Homo sapiens GN=ITIH3 PE=1 SV=2	ITIH3_HUMAN	swissprot_2012.fasta	99850.9	100.0%	16	19	22	0.157%	25.7%	GHGATNDLTFTEEVDMKEMEK	K	A	99.7%	72.1	27.5	72.1	3.82	0	0	1	2	2	2382.06			86759.7	521	541	Empty	true
Exp1_01	Inter-alpha-trypsin inhibitor heavy chain H3 OS=Homo sapiens GN=ITIH3 PE=1 SV=2	ITIH3_HUMAN	swissprot_2012.fasta	99850.9	100.0%	16	19	22	0.157%	25.7%	GMTNINDGLLR	K	G	99.7%	82.5	30.2	59.4	6.60	0	1	0	0	2	1203.62			64106.2	358	368	Empty	true
Exp1_01	Inter-alpha-trypsin inhibitor heavy chain H3 OS=Homo sapiens GN=ITIH3 PE=1 SV=2	ITIH3_HUMAN	swissprot_2012.fasta	99850.9	100.0%	16	19	22	0.157%	25.7%	KGHVSFKPSLDQQR	K	S	97.8%	33.4	28.4	33.4	0.000	0	0	0	1	2	1626.87			268559	221	234	Empty	true
Exp1_01	Inter-alpha-trypsin inhibitor heavy chain H3 OS=Homo sapiens GN=ITIH3 PE=1 SV=2	ITIH3_HUMAN	swissprot_2012.fasta	99850.9	100.0%	16	19	22	0.157%	25.7%	LVDEDMNSFK	R	A	99.7%	69.9	26.3	69.9	3.64	0	2	0	0	2	1197.55			16895.9	507	516	Empty	true
Exp1_01	Inter-alpha-trypsin inhibitor heavy chain H3 OS=Homo sapiens GN=ITIH3 PE=1 SV=2	ITIH3_HUMAN	swissprot_2012.fasta	99850.9	100.0%	16	19	22	0.157%	25.7%	LWAYLTIEQLLEK	R	R	99.7%	84.8	25.3	64.7	3.14	0	1	0	0	2	1619.9			8845.71	557	569	Empty	true
Exp1_01	Inter-alpha-trypsin inhibitor heavy chain H3 OS=Homo sapiens GN=ITIH3 PE=1 SV=2	ITIH3_HUMAN	swissprot_2012.fasta	99850.9	100.0%	16	19	22	0.157%	25.7%	NAHGEEKENLTAR	K	A	99.7%	36.0	28.6	36.0	1.47	0	0	1	0	2	1468.71			5904.69	572	584	Empty	true
Exp1_01	Inter-alpha-trypsin inhibitor heavy chain H3 OS=Homo sapiens GN=ITIH3 PE=1 SV=2	ITIH3_HUMAN	swissprot_2012.fasta	99850.9	100.0%	16	19	22	0.157%	25.7%	SLPEGVANGIEVYSTK	R	I	99.7%	75.2	29.6	75.2	4.72	0	4	0	0	2	1663.85			38558.2	34	49	Empty	true
Exp1_01	Inter-alpha-trypsin inhibitor heavy chain H3 OS=Homo sapiens GN=ITIH3 PE=1 SV=2	ITIH3_HUMAN	swissprot_2012.fasta	99850.9	100.0%	16	19	22	0.157%	25.7%	STSIVIMLTDGDANVGESRPEK	R	I	99.7%	74.0	30.6	74.0	3.19	0	0	1	0	2	2319.15			20663.1	386	407	Empty	true
Exp1_01	Inter-alpha-trypsin inhibitor heavy chain H3 OS=Homo sapiens GN=ITIH3 PE=1 SV=2	ITIH3_HUMAN	swissprot_2012.fasta	99850.9	100.0%	16	19	22	0.157%	25.7%	VTFELTYEELLKR	K	H	99.7%	43.1	27.5	43.1	1.10	0	0	1	0	2	1640.89			62283.2	150	162	Empty	true
Exp1_01	Inter-alpha-trypsin inhibitor heavy chain H3 OS=Homo sapiens GN=ITIH3 PE=1 SV=2	ITIH3_HUMAN	swissprot_2012.fasta	99850.9	100.0%	16	19	22	0.157%	25.7%	YHFVTPLTSMVVTKPEDNEDER	K	A	99.7%	59.3	29.8	59.3	7.31	0	0	1	0	2	2607.24			5477.8	592	613	Empty	true
Exp1_01	Ig gamma-1 chain C region OS=Homo sapiens GN=IGHG1 PE=1 SV=1	IGHG1_HUMAN	swissprot_2012.fasta	36105	100.0%	7	16	22	0.157%	27.6%	DTLMISR	K	T	99.1%	43.8	28.1	15.9	0.000	0	2	0	0	2	8354343			598934	132	138	Empty	true	IGHG3_HUMANIGHG2_HUMAN
Exp1_01	Ig gamma-1 chain C region OS=Homo sapiens GN=IGHG1 PE=1 SV=1	IGHG1_HUMAN	swissprot_2012.fasta	36105	100.0%	7	16	22	0.157%	27.6%	FNWYVDGVEVHNAK	K	T	99.7%	75.2	29.4	75.2	8.12	0	3	4	0	2	1677.8			1119960	158	171	Empty	true	IGHG2_HUMAN
Exp1_01	Ig gamma-1 chain C region OS=Homo sapiens GN=IGHG1 PE=1 SV=1	IGHG1_HUMAN	swissprot_2012.fasta	36105	100.0%	7	16	22	0.157%	27.6%	GFYPSDIAVEWESNGQPENNYK	K	T	99.7%	103	27.9	90.6	6.06	0	2	0	0	2	2544.13			21509.9	254	275	Empty	true
Exp1_01	Ig gamma-1 chain C region OS=Homo sapiens GN=IGHG1 PE=1 SV=1	IGHG1_HUMAN	swissprot_2012.fasta	36105	100.0%	7	16	22	0.157%	27.6%	GPSVFPLAPSSK	K	S	99.7%	43.5	29.1	29.4	2.42	0	2	0	0	2	1186.65			250351	5	16	Empty	true
Exp1_01	Ig gamma-1 chain C region OS=Homo sapiens GN=IGHG1 PE=1 SV=1	IGHG1_HUMAN	swissprot_2012.fasta	36105	100.0%	7	16	22	0.157%	27.6%	TTPPVLDSDGSFFLYSK	K	L	99.7%	68.8	30.2	53.2	4.54	0	1	1	0	2	1873.92			65472.2	276	292	Empty	true
Exp1_01	Ig gamma-1 chain C region OS=Homo sapiens GN=IGHG1 PE=1 SV=1	IGHG1_HUMAN	swissprot_2012.fasta	36105	100.0%	7	16	22	0.157%	27.6%	VVSVLTVLHQDWLNGK	R	E	99.7%	75.4	25.0	75.4	8.26	0	3	2	0	2	1808.01			1721210	185	200	Empty	true	IGHG3_HUMAN
Exp1_01	Ig gamma-1 chain C region OS=Homo sapiens GN=IGHG1 PE=1 SV=1	IGHG1_HUMAN	swissprot_2012.fasta	36105	100.0%	7	16	22	0.157%	27.6%	VVSVLTVLHQDWLNGKEYK	R	C	99.0%	37.1	26.8	9.91	1.33	0	0	2	0	2	2229.19			264890	185	203	Empty	true	IGHG3_HUMAN
Exp1_01	Ig kappa chain C region OS=Homo sapiens GN=IGKC PE=1 SV=1	IGKC_HUMAN	swissprot_2012.fasta	11608.6	100.0%	7	13	36	0.257%	82.1%	DSTYSLSSTLTLSK	K	A	99.7%	77.3	29.9	56.9	7.28	0	12	0	0	2	1502.76			324156	62	75	Empty	true
Exp1_01	Ig kappa chain C region OS=Homo sapiens GN=IGKC PE=1 SV=1	IGKC_HUMAN	swissprot_2012.fasta	11608.6	100.0%	7	13	36	0.257%	82.1%	HKVYACEVTHQGLSSPVTK	K	S	99.6%	46.2	30.0	46.2	0.000	0	0	1	0	2	2184.08			19998.3	81	99	Empty	true
Exp1_01	Ig kappa chain C region OS=Homo sapiens GN=IGKC PE=1 SV=1	IGKC_HUMAN	swissprot_2012.fasta	11608.6	100.0%	7	13	36	0.257%	82.1%	SGTASVVCLLNNFYPR	K	E	99.7%	35.1	29.4	35.1	6.54	0	1	0	0	2	1798.88			69550.5	19	34	Empty	true
Exp1_01	Ig kappa chain C region OS=Homo sapiens GN=IGKC PE=1 SV=1	IGKC_HUMAN	swissprot_2012.fasta	11608.6	100.0%	7	13	36	0.257%	82.1%	TVAAPSVFIFPPSDEQLK	-	S	99.7%	63.4	28.8	42.3	4.51	0	2	2	0	2	1946.03			430432	1	18	Empty	true
Exp1_01	Ig kappa chain C region OS=Homo sapiens GN=IGKC PE=1 SV=1	IGKC_HUMAN	swissprot_2012.fasta	11608.6	100.0%	7	13	36	0.257%	82.1%	VDNALQSGNSQESVTEQDSK	K	D	99.7%	130	28.4	130	8.54	0	5	5	0	2	2135.97			564328	42	61	Empty	true
Exp1_01	Ig kappa chain C region OS=Homo sapiens GN=IGKC PE=1 SV=1	IGKC_HUMAN	swissprot_2012.fasta	11608.6	100.0%	7	13	36	0.257%	82.1%	VDNALQSGNSQESVTEQDSKDSTYSLSSTLTLSK	K	A	99.7%	137	29.5	124	4.32	0	0	6	1	2	3619.71			324124	42	75	Empty	true
Exp1_01	Ig kappa chain C region OS=Homo sapiens GN=IGKC PE=1 SV=1	IGKC_HUMAN	swissprot_2012.fasta	11608.6	100.0%	7	13	36	0.257%	82.1%	VYACEVTHQGLSSPVTK	K	S	99.7%	53.0	29.8	53.0	0.000	0	1	0	0	2	1918.92			4138.55	83	99	Empty	true
Exp1_01	C4b-binding protein alpha chain OS=Homo sapiens GN=C4BPA PE=1 SV=2	C4BPA_HUMAN	swissprot_2012.fasta	67033	100.0%	15	22	39	0.278%	23.5%	EDVYVVGTVLR	K	Y	99.7%	71.9	27.7	38.8	3.89	0	3	0	0	2	1249.68			172797	319	329	Empty	true
Exp1_01	C4b-binding protein alpha chain OS=Homo sapiens GN=C4BPA PE=1 SV=2	C4BPA_HUMAN	swissprot_2012.fasta	67033	100.0%	15	22	39	0.278%	23.5%	FSAICQGDGTWSPR	R	T	99.7%	61.5	25.6	61.5	4.60	0	1	0	0	2	1582.7			13372.5	405	418	Empty	true
Exp1_01	C4b-binding protein alpha chain OS=Homo sapiens GN=C4BPA PE=1 SV=2	C4BPA_HUMAN	swissprot_2012.fasta	67033	100.0%	15	22	39	0.278%	23.5%	GYILVGQAK	K	L	99.7%	66.7	25.0	53.8	2.03	0	2	0	0	2	9485514			175072	457	465	Empty	true
Exp1_01	C4b-binding protein alpha chain OS=Homo sapiens GN=C4BPA PE=1 SV=2	C4BPA_HUMAN	swissprot_2012.fasta	67033	100.0%	15	22	39	0.278%	23.5%	HPGELRNGQVEIK	R	T	99.5%	43.9	29.2	9.13	2.52	0	1	0	0	2	1477.78			3216.67	115	127	Empty	true
Exp1_01	C4b-binding protein alpha chain OS=Homo sapiens GN=C4BPA PE=1 SV=2	C4BPA_HUMAN	swissprot_2012.fasta	67033	100.0%	15	22	39	0.278%	23.5%	KPDVSHGEMVSGFGPIYNYK	R	D	99.7%	104	30.0	104	11.9	0	2	5	1	2	2225.07			2384100	241	260	Empty	true
Exp1_01	C4b-binding protein alpha chain OS=Homo sapiens GN=C4BPA PE=1 SV=2	C4BPA_HUMAN	swissprot_2012.fasta	67033	100.0%	15	22	39	0.278%	23.5%	KPDVSHGEMVSGFGPIYNYKDTIVFK	R	C	99.7%	73.4	30.1	58.8	3.96	0	0	0	2	2	2928.46			65519.2	241	266	Empty	true
Exp1_01	C4b-binding protein alpha chain OS=Homo sapiens GN=C4BPA PE=1 SV=2	C4BPA_HUMAN	swissprot_2012.fasta	67033	100.0%	15	22	39	0.278%	23.5%	KPELVNGR	R	L	99.7%	38.8	25.4	26.3	3.14	0	4	0	0	2	9135103			337010	486	493	Empty	true
Exp1_01	C4b-binding protein alpha chain OS=Homo sapiens GN=C4BPA PE=1 SV=2	C4BPA_HUMAN	swissprot_2012.fasta	67033	100.0%	15	22	39	0.278%	23.5%	LNNGEITQHR	K	K	99.7%	60.7	28.1	43.4	1.21	0	5	0	0	2	1181.6			119148	370	379	Empty	true
Exp1_01	C4b-binding protein alpha chain OS=Homo sapiens GN=C4BPA PE=1 SV=2	C4BPA_HUMAN	swissprot_2012.fasta	67033	100.0%	15	22	39	0.278%	23.5%	LNNGEITQHRK	K	S	99.2%	43.5	27.3	25.6	0.000	0	3	0	0	2	1309.7			57300.7	370	380	Empty	true
Exp1_01	C4b-binding protein alpha chain OS=Homo sapiens GN=C4BPA PE=1 SV=2	C4BPA_HUMAN	swissprot_2012.fasta	67033	100.0%	15	22	39	0.278%	23.5%	LSLEIEQLELQR	K	D	99.7%	73.7	27.0	44.2	1.70	0	2	1	0	2	1470.82			99846	574	585	Empty	true
Exp1_01	C4b-binding protein alpha chain OS=Homo sapiens GN=C4BPA PE=1 SV=2	C4BPA_HUMAN	swissprot_2012.fasta	67033	100.0%	15	22	39	0.278%	23.5%	LSLEIEQLELQRDSAR	K	Q	96.6%	35.6	28.1	35.6	0.000	0	0	1	0	2	1900.01			8641.01	574	589	Empty	true
Exp1_01	C4b-binding protein alpha chain OS=Homo sapiens GN=C4BPA PE=1 SV=2	C4BPA_HUMAN	swissprot_2012.fasta	67033	100.0%	15	22	39	0.278%	23.5%	MALEVYK	K	L	99.3%	30.8	26.5	13.8	1.38	0	2	0	0	2	8534488			338944	567	573	Empty	true
Exp1_01	C4b-binding protein alpha chain OS=Homo sapiens GN=C4BPA PE=1 SV=2	C4BPA_HUMAN	swissprot_2012.fasta	67033	100.0%	15	22	39	0.278%	23.5%	QSSSYSFFK	K	E	99.6%	46.3	26.4	46.3	0.000	0	1	0	0	2	1080.5			146058	439	447	Empty	true
Exp1_01	C4b-binding protein alpha chain OS=Homo sapiens GN=C4BPA PE=1 SV=2	C4BPA_HUMAN	swissprot_2012.fasta	67033	100.0%	15	22	39	0.278%	23.5%	QSTLDKEL	R	-	95.5%	38.1	28.8	26.3	0.000	0	1	0	0	2	9334889			86799.8	590	597	Empty	true
Exp1_01	C4b-binding protein alpha chain OS=Homo sapiens GN=C4BPA PE=1 SV=2	C4BPA_HUMAN	swissprot_2012.fasta	67033	100.0%	15	22	39	0.278%	23.5%	TWYPEVPK	R	C	98.7%	29.7	29.0	14.5	2.47	0	2	0	0	2	1019.52			669839	530	537	Empty	true
Exp1_01	Talin-1 OS=Homo sapiens GN=TLN1 PE=1 SV=3	TLN1_HUMAN	swissprot_2012.fasta	269765	100.0%	32	34	34	0.242%	16.5%	AAGHPGDPESQQR	K	L	99.7%	47.1	27.5	47.1	2.52	0	1	1	0	2	1349.62			12134.1	1172	1184	Empty	true
Exp1_01	Talin-1 OS=Homo sapiens GN=TLN1 PE=1 SV=3	TLN1_HUMAN	swissprot_2012.fasta	269765	100.0%	32	34	34	0.242%	16.5%	ADAEGESDLENSR	K	K	99.7%	98.6	25.0	82.8	3.51	0	1	0	0	2	1392.59			4935.8	842	854	Empty	true
Exp1_01	Talin-1 OS=Homo sapiens GN=TLN1 PE=1 SV=3	TLN1_HUMAN	swissprot_2012.fasta	269765	100.0%	32	34	34	0.242%	16.5%	ALDYYMLR	K	N	99.7%	39.4	27.3	25.9	1.60	0	1	0	0	2	1044.52			12532.7	67	74	Empty	true
Exp1_01	Talin-1 OS=Homo sapiens GN=TLN1 PE=1 SV=3	TLN1_HUMAN	swissprot_2012.fasta	269765	100.0%	32	34	34	0.242%	16.5%	ALGDLISATK	K	A	99.7%	53.1	27.1	37.4	2.04	0	1	0	0	2	9885675			7338.13	2090	2099	Empty	true
Exp1_01	Talin-1 OS=Homo sapiens GN=TLN1 PE=1 SV=3	TLN1_HUMAN	swissprot_2012.fasta	269765	100.0%	32	34	34	0.242%	16.5%	ALSTDPAAPNLK	K	S	99.7%	41.1	26.1	29.4	4.19	0	1	0	0	2	1197.65			8942.22	1321	1332	Empty	true
Exp1_01	Talin-1 OS=Homo sapiens GN=TLN1 PE=1 SV=3	TLN1_HUMAN	swissprot_2012.fasta	269765	100.0%	32	34	34	0.242%	16.5%	AVAEQIPLLVQGVR	K	G	99.7%	44.6	25.0	29.5	5.64	0	1	0	0	2	1492.88			5668.78	958	971	Empty	true
Exp1_01	Talin-1 OS=Homo sapiens GN=TLN1 PE=1 SV=3	TLN1_HUMAN	swissprot_2012.fasta	269765	100.0%	32	34	34	0.242%	16.5%	AVASAAAALVLK	K	A	99.7%	64.1	25.0	34.3	3.46	0	1	0	0	2	1084.67			12516.3	674	685	Empty	true
Exp1_01	Talin-1 OS=Homo sapiens GN=TLN1 PE=1 SV=3	TLN1_HUMAN	swissprot_2012.fasta	269765	100.0%	32	34	34	0.242%	16.5%	DLDQASLAAVSQQLAPR	R	E	99.7%	48.9	28.8	33.4	1.27	0	0	1	0	2	1782.93			4892.78	1674	1690	Empty	true
Exp1_01	Talin-1 OS=Homo sapiens GN=TLN1 PE=1 SV=3	TLN1_HUMAN	swissprot_2012.fasta	269765	100.0%	32	34	34	0.242%	16.5%	DPPSWSVLAGHSR	R	T	99.7%	50.8	29.1	50.8	2.57	0	0	1	0	2	1408.7			24074.3	1626	1638	Empty	true
Exp1_01	Talin-1 OS=Homo sapiens GN=TLN1 PE=1 SV=3	TLN1_HUMAN	swissprot_2012.fasta	269765	100.0%	32	34	34	0.242%	16.5%	GVGAAATAVTQALNELLQHVK	R	A	99.7%	64.6	25.0	64.6	7.40	0	0	1	0	2	2091.16			98235.2	766	786	Empty	true
Exp1_01	Talin-1 OS=Homo sapiens GN=TLN1 PE=1 SV=3	TLN1_HUMAN	swissprot_2012.fasta	269765	100.0%	32	34	34	0.242%	16.5%	IGITNHDEYSLVR	R	E	99.7%	41.8	30.0	20.2	1.15	0	0	1	0	2	1516.78			17616.1	119	131	Empty	true
Exp1_01	Talin-1 OS=Homo sapiens GN=TLN1 PE=1 SV=3	TLN1_HUMAN	swissprot_2012.fasta	269765	100.0%	32	34	34	0.242%	16.5%	ILAQATSDLVNAIK	R	A	99.7%	109	25.8	97.5	5.37	0	1	0	0	2	1456.84			11986.8	828	841	Empty	true
Exp1_01	Talin-1 OS=Homo sapiens GN=TLN1 PE=1 SV=3	TLN1_HUMAN	swissprot_2012.fasta	269765	100.0%	32	34	34	0.242%	16.5%	KAAGHPGDPESQQR	K	L	99.7%	40.4	29.4	40.4	4.20	0	0	1	0	2	1477.71			3020.97	1171	1184	Empty	true
Exp1_01	Talin-1 OS=Homo sapiens GN=TLN1 PE=1 SV=3	TLN1_HUMAN	swissprot_2012.fasta	269765	100.0%	32	34	34	0.242%	16.5%	LAQAAQSSVATITR	K	L	99.7%	110	27.8	88.4	3.92	0	1	0	0	2	1416.78			8217.33	2044	2057	Empty	true
Exp1_01	Talin-1 OS=Homo sapiens GN=TLN1 PE=1 SV=3	TLN1_HUMAN	swissprot_2012.fasta	269765	100.0%	32	34	34	0.242%	16.5%	LASEAKPAAVAAENEEIGSHIK	R	H	99.7%	40.7	29.0	40.7	1.55	0	0	0	1	2	2235.16			45474.1	1896	1917	Empty	true
Exp1_01	Talin-1 OS=Homo sapiens GN=TLN1 PE=1 SV=3	TLN1_HUMAN	swissprot_2012.fasta	269765	100.0%	32	34	34	0.242%	16.5%	LHTDDELNWLDHGR	K	T	99.7%	35.8	28.7	35.8	2.85	0	0	1	0	2	1720.8			8549.25	165	178	Empty	true
Exp1_01	Talin-1 OS=Homo sapiens GN=TLN1 PE=1 SV=3	TLN1_HUMAN	swissprot_2012.fasta	269765	100.0%	32	34	34	0.242%	16.5%	LLAALLEDEGGSGRPLLQAAK	K	G	99.7%	61.6	25.0	61.6	3.74	0	0	1	0	2	2122.19			26858.1	593	613	Empty	true
Exp1_01	Talin-1 OS=Homo sapiens GN=TLN1 PE=1 SV=3	TLN1_HUMAN	swissprot_2012.fasta	269765	100.0%	32	34	34	0.242%	16.5%	MATNAAAQNAIK	R	K	99.6%	48.8	29.9	34.3	0.000	0	1	0	0	2	1203.62			15136.5	899	910	Empty	true
Exp1_01	Talin-1 OS=Homo sapiens GN=TLN1 PE=1 SV=3	TLN1_HUMAN	swissprot_2012.fasta	269765	100.0%	32	34	34	0.242%	16.5%	NGDTMEYR	R	K	99.7%	48.8	25.0	29.6	3.16	0	1	0	0	2	9863885			4999.51	75	82	Empty	true
Exp1_01	Talin-1 OS=Homo sapiens GN=TLN1 PE=1 SV=3	TLN1_HUMAN	swissprot_2012.fasta	269765	100.0%	32	34	34	0.242%	16.5%	NGNLPEFGDAISTASK	K	A	99.7%	40.4	29.4	3.22	3.48	0	1	0	0	2	1621.77			5593.92	1416	1431	Empty	true
Exp1_01	Talin-1 OS=Homo sapiens GN=TLN1 PE=1 SV=3	TLN1_HUMAN	swissprot_2012.fasta	269765	100.0%	32	34	34	0.242%	16.5%	NLGTALAELR	K	T	99.7%	58.6	27.3	38.8	2.82	0	1	0	0	2	1057.6			6811.74	1026	1035	Empty	true
Exp1_01	Talin-1 OS=Homo sapiens GN=TLN1 PE=1 SV=3	TLN1_HUMAN	swissprot_2012.fasta	269765	100.0%	32	34	34	0.242%	16.5%	QAAASATQTIAAAQHAASTPK	K	A	99.7%	37.5	29.5	37.5	2.35	0	0	1	0	2	1995.03			40611.2	923	943	Empty	true
Exp1_01	Talin-1 OS=Homo sapiens GN=TLN1 PE=1 SV=3	TLN1_HUMAN	swissprot_2012.fasta	269765	100.0%	32	34	34	0.242%	16.5%	QEDVIATANLSR	R	R	99.7%	60.8	30.2	45.5	2.44	0	1	0	0	2	1316.68			7194.07	2198	2209	Empty	true
Exp1_01	Talin-1 OS=Homo sapiens GN=TLN1 PE=1 SV=3	TLN1_HUMAN	swissprot_2012.fasta	269765	100.0%	32	34	34	0.242%	16.5%	RQFVQSAK	K	E	99.7%	38.5	25.0	21.4	2.08	0	1	0	0	2	9635370			10378.4	1523	1530	Empty	true
Exp1_01	Talin-1 OS=Homo sapiens GN=TLN1 PE=1 SV=3	TLN1_HUMAN	swissprot_2012.fasta	269765	100.0%	32	34	34	0.242%	16.5%	SIAAATSALVK	K	A	95.8%	23.5	25.0	23.5	1.28	0	1	0	0	2	1031.61			1053.97	2351	2361	Empty	true
Exp1_01	Talin-1 OS=Homo sapiens GN=TLN1 PE=1 SV=3	TLN1_HUMAN	swissprot_2012.fasta	269765	100.0%	32	34	34	0.242%	16.5%	STVLQQQYNR	K	V	99.7%	38.5	28.7	26.9	1.55	0	1	0	0	2	1236.63			2085.2	429	438	Empty	true
Exp1_01	Talin-1 OS=Homo sapiens GN=TLN1 PE=1 SV=3	TLN1_HUMAN	swissprot_2012.fasta	269765	100.0%	32	34	34	0.242%	16.5%	TLSHPQQMALLDQTK	K	T	99.7%	40.5	28.8	28.0	3.13	0	0	1	0	2	1710.88			10169.7	1752	1766	Empty	true
Exp1_01	Talin-1 OS=Homo sapiens GN=TLN1 PE=1 SV=3	TLN1_HUMAN	swissprot_2012.fasta	269765	100.0%	32	34	34	0.242%	16.5%	TMLESAGGLIQTAR	K	A	99.3%	31.1	29.4	12.8	1.92	0	0	1	0	2	1447.76			5724.54	1605	1618	Empty	true
Exp1_01	Talin-1 OS=Homo sapiens GN=TLN1 PE=1 SV=3	TLN1_HUMAN	swissprot_2012.fasta	269765	100.0%	32	34	34	0.242%	16.5%	VKADQDSEAMKR	K	L	99.7%	44.2	29.8	34.2	2.74	0	1	1	0	2	1377.68			9939.16	2444	2455	Empty	true
Exp1_01	Talin-1 OS=Homo sapiens GN=TLN1 PE=1 SV=3	TLN1_HUMAN	swissprot_2012.fasta	269765	100.0%	32	34	34	0.242%	16.5%	VLGEAMTGISQNAK	K	N	99.7%	82.1	29.8	66.0	2.32	0	1	0	0	2	1418.73			5526.52	1402	1415	Empty	true
Exp1_01	Talin-1 OS=Homo sapiens GN=TLN1 PE=1 SV=3	TLN1_HUMAN	swissprot_2012.fasta	269765	100.0%	32	34	34	0.242%	16.5%	VLVQNAAGSQEK	K	L	99.7%	72.4	28.9	72.4	3.36	0	1	0	0	2	1243.66			16118.9	2032	2043	Empty	true
Exp1_01	Talin-1 OS=Homo sapiens GN=TLN1 PE=1 SV=3	TLN1_HUMAN	swissprot_2012.fasta	269765	100.0%	32	34	34	0.242%	16.5%	VMVTNVTSLLK	K	T	98.5%	38.8	25.0	38.8	0.000	0	1	0	0	2	1204.7			22482.3	2120	2130	Empty	true
Exp1_01	Filamin-A OS=Homo sapiens GN=FLNA PE=1 SV=4	FLNA_HUMAN	swissprot_2012.fasta	280729	100.0%	30	32	32	0.228%	15.7%	AFGPGLQGGSAGSPAR	K	F	99.7%	80.5	29.0	80.5	5.60	0	1	0	0	2	1429.72			41683.8	1072	1087	Empty	true
Exp1_01	Filamin-A OS=Homo sapiens GN=FLNA PE=1 SV=4	FLNA_HUMAN	swissprot_2012.fasta	280729	100.0%	30	32	32	0.228%	15.7%	AGNNMLLVGVHGPR	K	T	99.7%	53.2	28.5	40.6	0.000	0	0	1	0	2	1434.76			20014.4	2585	2598	Empty	true
Exp1_01	Filamin-A OS=Homo sapiens GN=FLNA PE=1 SV=4	FLNA_HUMAN	swissprot_2012.fasta	280729	100.0%	30	32	32	0.228%	15.7%	AGQSAAGAAPGGGVDTR	R	D	99.7%	53.4	28.0	53.4	3.68	0	1	0	0	2	1442.7			2955.83	8	24	Empty	true
Exp1_01	Filamin-A OS=Homo sapiens GN=FLNA PE=1 SV=4	FLNA_HUMAN	swissprot_2012.fasta	280729	100.0%	30	32	32	0.228%	15.7%	ALTQTGGPHVK	R	A	99.7%	40.6	26.5	30.4	1.55	0	1	0	0	2	1108.61			10443.6	1284	1294	Empty	true
Exp1_01	Filamin-A OS=Homo sapiens GN=FLNA PE=1 SV=4	FLNA_HUMAN	swissprot_2012.fasta	280729	100.0%	30	32	32	0.228%	15.7%	ANLPQSFQVDTSK	R	A	99.7%	76.5	29.9	64.6	5.42	0	1	0	0	2	1434.72			17565.1	1465	1477	Empty	true
Exp1_01	Filamin-A OS=Homo sapiens GN=FLNA PE=1 SV=4	FLNA_HUMAN	swissprot_2012.fasta	280729	100.0%	30	32	32	0.228%	15.7%	AWGPGLEGGVVGK	R	S	99.7%	71.5	27.5	71.5	3.38	0	1	0	0	2	1226.65			10489.1	581	593	Empty	true
Exp1_01	Filamin-A OS=Homo sapiens GN=FLNA PE=1 SV=4	FLNA_HUMAN	swissprot_2012.fasta	280729	100.0%	30	32	32	0.228%	15.7%	DAGEGGLSLAIEGPSK	K	A	99.7%	112	29.6	100.0	4.80	0	1	0	0	2	1500.75			3662.84	1892	1907	Empty	true
Exp1_01	Filamin-A OS=Homo sapiens GN=FLNA PE=1 SV=4	FLNA_HUMAN	swissprot_2012.fasta	280729	100.0%	30	32	32	0.228%	15.7%	EAGAGGLAIAVEGPSK	R	A	99.7%	58.0	28.1	58.0	3.36	0	1	0	0	2	1426.75			11818.4	2265	2280	Empty	true
Exp1_01	Filamin-A OS=Homo sapiens GN=FLNA PE=1 SV=4	FLNA_HUMAN	swissprot_2012.fasta	280729	100.0%	30	32	32	0.228%	15.7%	FNEEHIPDSPFVVPVASPSGDAR	K	R	99.7%	27.1	30.1	11.4	4.15	0	0	1	0	2	2467.19			7986.11	2311	2333	Empty	true
Exp1_01	Filamin-A OS=Homo sapiens GN=FLNA PE=1 SV=4	FLNA_HUMAN	swissprot_2012.fasta	280729	100.0%	30	32	32	0.228%	15.7%	GAGTGGLGLAVEGPSEAK	R	M	99.7%	77.2	29.2	66.1	3.54	0	1	0	0	2	1570.81			5591.42	1382	1399	Empty	true
Exp1_01	Filamin-A OS=Homo sapiens GN=FLNA PE=1 SV=4	FLNA_HUMAN	swissprot_2012.fasta	280729	100.0%	30	32	32	0.228%	15.7%	GTVEPQLEAR	K	G	98.1%	27.8	26.9	27.8	1.62	0	1	0	0	2	1099.57			5144.55	428	437	Empty	true
Exp1_01	Filamin-A OS=Homo sapiens GN=FLNA PE=1 SV=4	FLNA_HUMAN	swissprot_2012.fasta	280729	100.0%	30	32	32	0.228%	15.7%	IANLQTDLSDGLR	R	L	99.7%	92.9	29.7	92.9	3.62	0	1	0	0	2	1415.75			15462	64	76	Empty	true
Exp1_01	Filamin-A OS=Homo sapiens GN=FLNA PE=1 SV=4	FLNA_HUMAN	swissprot_2012.fasta	280729	100.0%	30	32	32	0.228%	15.7%	IQQNTFTR	K	W	99.7%	40.2	26.9	30.0	1.33	0	1	0	0	2	1007.53			36177.9	44	51	Empty	true
Exp1_01	Filamin-A OS=Homo sapiens GN=FLNA PE=1 SV=4	FLNA_HUMAN	swissprot_2012.fasta	280729	100.0%	30	32	32	0.228%	15.7%	KGEITGEVR	K	M	99.7%	59.7	28.3	31.9	2.60	0	1	0	0	2	9885423			11834.1	1801	1809	Empty	true
Exp1_01	Filamin-A OS=Homo sapiens GN=FLNA PE=1 SV=4	FLNA_HUMAN	swissprot_2012.fasta	280729	100.0%	30	32	32	0.228%	15.7%	LIALLEVLSQK	R	K	99.7%	88.3	25.0	73.9	3.48	0	1	0	0	2	1226.77			18790.1	77	87	Empty	true
Exp1_01	Filamin-A OS=Homo sapiens GN=FLNA PE=1 SV=4	FLNA_HUMAN	swissprot_2012.fasta	280729	100.0%	30	32	32	0.228%	15.7%	LLGWIQNK	R	L	99.7%	51.2	28.0	28.5	0.000	0	1	0	0	2	9715674			16982.8	172	179	Empty	true
Exp1_01	Filamin-A OS=Homo sapiens GN=FLNA PE=1 SV=4	FLNA_HUMAN	swissprot_2012.fasta	280729	100.0%	30	32	32	0.228%	15.7%	LSPFMADIR	R	D	99.7%	45.8	28.5	30.6	2.02	0	1	0	0	2	1049.54			25550.1	656	664	Empty	true
Exp1_01	Filamin-A OS=Homo sapiens GN=FLNA PE=1 SV=4	FLNA_HUMAN	swissprot_2012.fasta	280729	100.0%	30	32	32	0.228%	15.7%	NDNDTFTVK	R	Y	99.4%	30.4	25.5	30.4	1.44	0	1	0	0	2	1053.48			7406	829	837	Empty	true
Exp1_01	Filamin-A OS=Homo sapiens GN=FLNA PE=1 SV=4	FLNA_HUMAN	swissprot_2012.fasta	280729	100.0%	30	32	32	0.228%	15.7%	RLTVSSLQESGLK	R	V	99.7%	36.5	25.8	15.1	1.66	0	0	1	0	2	1417.8			11222.7	2334	2346	Empty	true
Exp1_01	Filamin-A OS=Homo sapiens GN=FLNA PE=1 SV=4	FLNA_HUMAN	swissprot_2012.fasta	280729	100.0%	30	32	32	0.228%	15.7%	SAGQGEVLVYVEDPAGHQEEAK	R	V	99.7%	67.8	29.7	67.8	3.96	0	0	1	0	2	2313.1			42288	310	331	Empty	true
Exp1_01	Filamin-A OS=Homo sapiens GN=FLNA PE=1 SV=4	FLNA_HUMAN	swissprot_2012.fasta	280729	100.0%	30	32	32	0.228%	15.7%	TGVAVNKPAEFTVDAK	K	H	99.7%	47.3	29.3	35.7	3.03	0	1	1	0	2	1646.87			15097.9	685	700	Empty	true
Exp1_01	Filamin-A OS=Homo sapiens GN=FLNA PE=1 SV=4	FLNA_HUMAN	swissprot_2012.fasta	280729	100.0%	30	32	32	0.228%	15.7%	TGVELGKPTHFTVNAK	R	A	99.7%	46.9	28.3	36.7	3.31	0	0	1	0	2	1698.92			9785.77	885	900	Empty	true
Exp1_01	Filamin-A OS=Homo sapiens GN=FLNA PE=1 SV=4	FLNA_HUMAN	swissprot_2012.fasta	280729	100.0%	30	32	32	0.228%	15.7%	VANPSGNLTETYVQDR	R	G	99.7%	91.9	29.7	81.4	6.28	0	1	0	0	2	1763.86			9605.97	1297	1312	Empty	true
Exp1_01	Filamin-A OS=Homo sapiens GN=FLNA PE=1 SV=4	FLNA_HUMAN	swissprot_2012.fasta	280729	100.0%	30	32	32	0.228%	15.7%	VAQPTITDNKDGTVTVR	K	Y	99.7%	44.8	28.7	44.8	2.62	0	0	1	0	2	1814.96			29144.1	1815	1831	Empty	true
Exp1_01	Filamin-A OS=Homo sapiens GN=FLNA PE=1 SV=4	FLNA_HUMAN	swissprot_2012.fasta	280729	100.0%	30	32	32	0.228%	15.7%	VNVGAGSHPNK	R	V	99.7%	44.4	26.9	44.4	3.13	0	1	0	0	2	1079.56			8052.58	761	771	Empty	true
Exp1_01	Filamin-A OS=Homo sapiens GN=FLNA PE=1 SV=4	FLNA_HUMAN	swissprot_2012.fasta	280729	100.0%	30	32	32	0.228%	15.7%	VPVHDVTDASK	K	V	99.7%	59.4	28.3	47.2	3.43	0	1	0	0	2	1167.6			4451.01	1440	1450	Empty	true
Exp1_01	Filamin-A OS=Homo sapiens GN=FLNA PE=1 SV=4	FLNA_HUMAN	swissprot_2012.fasta	280729	100.0%	30	32	32	0.228%	15.7%	VTAQGPGLEPSGNIANK	K	T	99.7%	64.5	29.0	64.5	3.54	0	1	0	0	2	1652.86			3043.67	384	400	Empty	true
Exp1_01	Filamin-A OS=Homo sapiens GN=FLNA PE=1 SV=4	FLNA_HUMAN	swissprot_2012.fasta	280729	100.0%	30	32	32	0.228%	15.7%	VTVLFAGQHIAK	K	S	99.7%	77.9	25.1	77.9	2.96	0	1	1	0	2	1283.75			114061	356	367	Empty	true
Exp1_01	Filamin-A OS=Homo sapiens GN=FLNA PE=1 SV=4	FLNA_HUMAN	swissprot_2012.fasta	280729	100.0%	30	32	32	0.228%	15.7%	VTYTPMAPGSYLISIK	R	Y	99.7%	49.4	28.5	49.4	4.85	0	1	0	0	2	1740.92			7236.21	2485	2500	Empty	true
Exp1_01	Filamin-A OS=Homo sapiens GN=FLNA PE=1 SV=4	FLNA_HUMAN	swissprot_2012.fasta	280729	100.0%	30	32	32	0.228%	15.7%	YNEQHVPGSPFTAR	K	V	99.7%	42.6	28.6	25.3	3.74	0	0	1	0	2	1602.77			13926.2	1938	1951	Empty	true
Exp1_01	Complement C1q subcomponent subunit A OS=Homo sapiens GN=C1QA PE=1 SV=2	C1QA_HUMAN	swissprot_2012.fasta	26016.6	100.0%	5	8	28	0.200%	32.2%	GHIYQGSEADSVFSGFLIFPSA	K	-	99.7%	36.8	29.9	26.8	1.92	0	1	1	0	2	2329.11			15766.2	224	245	Empty	true
Exp1_01	Complement C1q subcomponent subunit A OS=Homo sapiens GN=C1QA PE=1 SV=2	C1QA_HUMAN	swissprot_2012.fasta	26016.6	100.0%	5	8	28	0.200%	32.2%	GLFQVVSGGMVLQLQQGDQVWVEKDPK	K	K	99.7%	71.9	27.7	61.6	2.72	0	0	11	9	2	2985.55			158989	196	222	Empty	true
Exp1_01	Complement C1q subcomponent subunit A OS=Homo sapiens GN=C1QA PE=1 SV=2	C1QA_HUMAN	swissprot_2012.fasta	26016.6	100.0%	5	8	28	0.200%	32.2%	GLFQVVSGGMVLQLQQGDQVWVEKDPKK	K	G	99.7%	46.2	26.4	46.2	3.21	0	0	1	0	2	3113.65			3910.08	196	223	Empty	true
Exp1_01	Complement C1q subcomponent subunit A OS=Homo sapiens GN=C1QA PE=1 SV=2	C1QA_HUMAN	swissprot_2012.fasta	26016.6	100.0%	5	8	28	0.200%	32.2%	KGHIYQGSEADSVFSGFLIFPSA	K	-	99.7%	78.1	30.1	66.2	3.40	0	1	3	0	2	2457.21			683616	223	245	Empty	true
Exp1_01	Complement C1q subcomponent subunit A OS=Homo sapiens GN=C1QA PE=1 SV=2	C1QA_HUMAN	swissprot_2012.fasta	26016.6	100.0%	5	8	28	0.200%	32.2%	RNPPMGGNVVIFDTVITNQEEPYQNHSGR	R	F	99.7%	42.3	30.2	28.8	1.42	0	0	0	1	2	3269.58			8485.43	122	150	Empty	true
Exp1_01	Prothrombin OS=Homo sapiens GN=F2 PE=1 SV=2	THRB_HUMAN	swissprot_2012.fasta	70036.8	100.0%	11	13	19	0.135%	22.0%	ELLESYIDGR	R	I	99.7%	52.1	28.6	42.0	1.59	0	4	0	0	2	1194.6			39184.5	354	363	Empty	true
Exp1_01	Prothrombin OS=Homo sapiens GN=F2 PE=1 SV=2	THRB_HUMAN	swissprot_2012.fasta	70036.8	100.0%	11	13	19	0.135%	22.0%	ENLDRDIALMK	R	L	99.7%	46.1	29.8	30.1	2.96	0	1	0	0	2	1317.68			22406.7	457	467	Empty	true
Exp1_01	Prothrombin OS=Homo sapiens GN=F2 PE=1 SV=2	THRB_HUMAN	swissprot_2012.fasta	70036.8	100.0%	11	13	19	0.135%	22.0%	ETAASLLQAGYK	R	G	99.7%	73.5	28.1	59.1	5.89	0	1	0	0	2	1251.66			117414	487	498	Empty	true
Exp1_01	Prothrombin OS=Homo sapiens GN=F2 PE=1 SV=2	THRB_HUMAN	swissprot_2012.fasta	70036.8	100.0%	11	13	19	0.135%	22.0%	ITDNMFCAGYKPDEGKR	R	G	99.7%	30.6	27.0	18.9	1.00	0	0	0	1	2	2002.9			16735.2	544	560	Empty	true
Exp1_01	Prothrombin OS=Homo sapiens GN=F2 PE=1 SV=2	THRB_HUMAN	swissprot_2012.fasta	70036.8	100.0%	11	13	19	0.135%	22.0%	IVEGSDAEIGMSPWQVMLFR	R	K	99.7%	112	30.2	99.8	9.27	0	2	2	0	2	2265.1			224701	364	383	Empty	true
Exp1_01	Prothrombin OS=Homo sapiens GN=F2 PE=1 SV=2	THRB_HUMAN	swissprot_2012.fasta	70036.8	100.0%	11	13	19	0.135%	22.0%	KSLEDKTER	K	E	99.5%	47.4	28.9	26.7	0.000	0	1	0	0	2	1105.58			1431.96	345	353	Empty	true
Exp1_01	Prothrombin OS=Homo sapiens GN=F2 PE=1 SV=2	THRB_HUMAN	swissprot_2012.fasta	70036.8	100.0%	11	13	19	0.135%	22.0%	SEGSSVNLSPPLEQCVPDR	R	G	97.9%	25.6	27.5	25.6	1.92	0	0	1	0	2	2073.93			32653.3	199	217	Empty	true
Exp1_01	Prothrombin OS=Homo sapiens GN=F2 PE=1 SV=2	THRB_HUMAN	swissprot_2012.fasta	70036.8	100.0%	11	13	19	0.135%	22.0%	SLEDKTER	K	E	99.7%	54.0	29.2	29.3	2.36	0	1	0	0	2	9774899			51390	346	353	Empty	true
Exp1_01	Prothrombin OS=Homo sapiens GN=F2 PE=1 SV=2	THRB_HUMAN	swissprot_2012.fasta	70036.8	100.0%	11	13	19	0.135%	22.0%	TATSEYQTFFNPR	R	T	99.7%	61.3	28.2	50.2	3.12	0	2	0	0	2	1561.73			32793.4	315	327	Empty	true
Exp1_01	Prothrombin OS=Homo sapiens GN=F2 PE=1 SV=2	THRB_HUMAN	swissprot_2012.fasta	70036.8	100.0%	11	13	19	0.135%	22.0%	VTGWGNLKETWTANVGK	R	G	99.7%	109	29.7	109	6.06	0	1	1	0	2	1860.96			103851	501	517	Empty	true
Exp1_01	Prothrombin OS=Homo sapiens GN=F2 PE=1 SV=2	THRB_HUMAN	swissprot_2012.fasta	70036.8	100.0%	11	13	19	0.135%	22.0%	YGFYTHVFR	K	L	99.7%	44.0	28.9	44.0	6.04	0	1	0	0	2	1189.58			139471	600	608	Empty	true
Exp1_01	Vitamin K-dependent protein S OS=Homo sapiens GN=PROS1 PE=1 SV=1	PROS_HUMAN	swissprot_2012.fasta	75123.4	100.0%	15	23	27	0.192%	27.8%	EAVMDINKPGPLFKPENGLLETK	K	V	99.7%	55.0	28.2	55.0	3.00	0	0	3	0	2	2540.34			38236.6	402	424	Empty	true
Exp1_01	Vitamin K-dependent protein S OS=Homo sapiens GN=PROS1 PE=1 SV=1	PROS_HUMAN	swissprot_2012.fasta	75123.4	100.0%	15	23	27	0.192%	27.8%	FSAEFDFR	R	T	99.7%	36.9	26.2	36.9	1.52	0	2	0	0	2	1018.46			422906	323	330	Empty	true
Exp1_01	Vitamin K-dependent protein S OS=Homo sapiens GN=PROS1 PE=1 SV=1	PROS_HUMAN	swissprot_2012.fasta	75123.4	100.0%	15	23	27	0.192%	27.8%	ITTGGDVINNGLWNMVSVEELEHSISIK	K	I	99.7%	66.0	29.5	1.19	2.48	0	0	2	1	2	3056.52			471428	371	398	Empty	true
Exp1_01	Vitamin K-dependent protein S OS=Homo sapiens GN=PROS1 PE=1 SV=1	PROS_HUMAN	swissprot_2012.fasta	75123.4	100.0%	15	23	27	0.192%	27.8%	KVESELIKPINPR	R	L	99.7%	64.1	25.0	49.0	2.28	0	1	2	0	2	1522.9			339676	433	445	Empty	true
Exp1_01	Vitamin K-dependent protein S OS=Homo sapiens GN=PROS1 PE=1 SV=1	PROS_HUMAN	swissprot_2012.fasta	75123.4	100.0%	15	23	27	0.192%	27.8%	NGFVMLSNK	K	K	99.7%	49.7	28.0	36.5	1.68	0	3	0	0	2	1009.51			104275	188	196	Empty	true
Exp1_01	Vitamin K-dependent protein S OS=Homo sapiens GN=PROS1 PE=1 SV=1	PROS_HUMAN	swissprot_2012.fasta	75123.4	100.0%	15	23	27	0.192%	27.8%	NGFVMLSNKK	K	D	99.6%	33.2	27.4	21.5	1.92	0	1	0	0	2	1137.61			18081	188	197	Empty	true
Exp1_01	Vitamin K-dependent protein S OS=Homo sapiens GN=PROS1 PE=1 SV=1	PROS_HUMAN	swissprot_2012.fasta	75123.4	100.0%	15	23	27	0.192%	27.8%	NNLELSTPLK	R	I	95.0%	39.1	30.3	0.000	0.000	0	1	0	0	2	1129.61			4609.94	582	591	Empty	true
Exp1_01	Vitamin K-dependent protein S OS=Homo sapiens GN=PROS1 PE=1 SV=1	PROS_HUMAN	swissprot_2012.fasta	75123.4	100.0%	15	23	27	0.192%	27.8%	NNLELSTPLKIETISHEDLQR	R	Q	99.7%	66.8	28.1	66.8	4.60	0	0	2	1	2	2450.29			208753	582	602	Empty	true
Exp1_01	Vitamin K-dependent protein S OS=Homo sapiens GN=PROS1 PE=1 SV=1	PROS_HUMAN	swissprot_2012.fasta	75123.4	100.0%	15	23	27	0.192%	27.8%	QGASGIKEIIQEK	K	Q	99.7%	59.5	28.2	59.5	4.49	0	1	0	0	2	1400.77			22359.9	458	470	Empty	true
Exp1_01	Vitamin K-dependent protein S OS=Homo sapiens GN=PROS1 PE=1 SV=1	PROS_HUMAN	swissprot_2012.fasta	75123.4	100.0%	15	23	27	0.192%	27.8%	QSTNAYPDLR	R	S	99.7%	74.0	28.5	61.4	1.26	0	1	0	0	2	1164.56			23134.6	102	111	Empty	true
Exp1_01	Vitamin K-dependent protein S OS=Homo sapiens GN=PROS1 PE=1 SV=1	PROS_HUMAN	swissprot_2012.fasta	75123.4	100.0%	15	23	27	0.192%	27.8%	SFQTGLFTAAR	R	Q	99.7%	73.3	27.3	55.6	5.05	0	1	0	0	2	1198.62			22233.5	91	101	Empty	true
Exp1_01	Vitamin K-dependent protein S OS=Homo sapiens GN=PROS1 PE=1 SV=1	PROS_HUMAN	swissprot_2012.fasta	75123.4	100.0%	15	23	27	0.192%	27.8%	SQDILLSVENTVIYR	K	I	99.7%	107	27.8	92.4	5.89	0	1	1	0	2	1749.94			53771.8	547	561	Empty	true
Exp1_01	Vitamin K-dependent protein S OS=Homo sapiens GN=PROS1 PE=1 SV=1	PROS_HUMAN	swissprot_2012.fasta	75123.4	100.0%	15	23	27	0.192%	27.8%	TYDSEGVILYAESIDHSAWLLIALR	R	G	99.7%	70.7	28.8	70.7	5.77	0	0	1	0	2	2835.46			3857.1	331	355	Empty	true
Exp1_01	Vitamin K-dependent protein S OS=Homo sapiens GN=PROS1 PE=1 SV=1	PROS_HUMAN	swissprot_2012.fasta	75123.4	100.0%	15	23	27	0.192%	27.8%	VNRNNLELSTPLKIETISHEDLQR	R	Q	99.7%	52.3	26.6	52.3	3.64	0	0	0	1	2	2819.5			18037.7	579	602	Empty	true
Exp1_01	Vitamin K-dependent protein S OS=Homo sapiens GN=PROS1 PE=1 SV=1	PROS_HUMAN	swissprot_2012.fasta	75123.4	100.0%	15	23	27	0.192%	27.8%	VYFAGFPR	K	K	98.7%	40.3	26.2	40.3	0.000	0	1	0	0	2	9564988			123239	425	432	Empty	true
Exp1_01	Fibrinogen gamma chain OS=Homo sapiens GN=FGG PE=1 SV=3	FIBG_HUMAN	swissprot_2012.fasta	51513.3	100.0%	15	21	26	0.185%	34.7%	AIQLTYNPDESSKPNMIDAATLK	K	S	99.7%	71.0	29.9	60.0	5.54	0	1	4	0	2	2520.27			111145	89	111	Empty	true
Exp1_01	Fibrinogen gamma chain OS=Homo sapiens GN=FGG PE=1 SV=3	FIBG_HUMAN	swissprot_2012.fasta	51513.3	100.0%	15	21	26	0.185%	34.7%	CHAGHLNGVYYQGGTYSK	K	A	99.7%	46.0	26.7	46.0	5.52	0	0	2	0	2	2012.89			21145.7	365	382	Empty	true
Exp1_01	Fibrinogen gamma chain OS=Homo sapiens GN=FGG PE=1 SV=3	FIBG_HUMAN	swissprot_2012.fasta	51513.3	100.0%	15	21	26	0.185%	34.7%	EGFGHLSPTGTTEFWLGNEK	K	I	99.7%	89.1	29.9	89.1	7.14	0	1	1	0	2	2207.04			66530.3	239	258	Empty	true
Exp1_01	Fibrinogen gamma chain OS=Homo sapiens GN=FGG PE=1 SV=3	FIBG_HUMAN	swissprot_2012.fasta	51513.3	100.0%	15	21	26	0.185%	34.7%	IHLISTQSAIPYALR	K	V	99.7%	102	25.0	102	9.43	0	1	0	0	2	1682.96			4049.07	259	273	Empty	true
Exp1_01	Fibrinogen gamma chain OS=Homo sapiens GN=FGG PE=1 SV=3	FIBG_HUMAN	swissprot_2012.fasta	51513.3	100.0%	15	21	26	0.185%	34.7%	KMLEEIMK	R	Y	99.7%	53.3	26.9	30.3	1.72	0	2	0	0	2	1021.54			39548.8	114	121	Empty	true
Exp1_01	Fibrinogen gamma chain OS=Homo sapiens GN=FGG PE=1 SV=3	FIBG_HUMAN	swissprot_2012.fasta	51513.3	100.0%	15	21	26	0.185%	34.7%	KMLEEIMKYEASILTHDSSIR	R	Y	99.7%	46.1	29.7	46.1	0.000	0	0	0	1	2	2494.27			32004.9	114	134	Empty	true
Exp1_01	Fibrinogen gamma chain OS=Homo sapiens GN=FGG PE=1 SV=3	FIBG_HUMAN	swissprot_2012.fasta	51513.3	100.0%	15	21	26	0.185%	34.7%	LDGSVDFK	R	K	98.4%	39.8	26.6	21.4	0.000	0	1	0	0	2	8804412			13580.7	224	231	Empty	true
Exp1_01	Fibrinogen gamma chain OS=Homo sapiens GN=FGG PE=1 SV=3	FIBG_HUMAN	swissprot_2012.fasta	51513.3	100.0%	15	21	26	0.185%	34.7%	LDGSVDFKK	R	N	99.7%	42.0	26.8	29.5	2.06	0	1	0	0	2	1008.54			33806.8	224	232	Empty	true
Exp1_01	Fibrinogen gamma chain OS=Homo sapiens GN=FGG PE=1 SV=3	FIBG_HUMAN	swissprot_2012.fasta	51513.3	100.0%	15	21	26	0.185%	34.7%	MLEEIMK	K	Y	99.2%	43.8	27.5	9.02	0.000	0	1	0	0	2	8934472			92123.6	115	121	Empty	true
Exp1_01	Fibrinogen gamma chain OS=Homo sapiens GN=FGG PE=1 SV=3	FIBG_HUMAN	swissprot_2012.fasta	51513.3	100.0%	15	21	26	0.185%	34.7%	QSGLYFIKPLK	K	A	99.7%	55.3	25.0	55.3	2.96	0	1	1	0	2	1293.76			125204	189	199	Empty	true
Exp1_01	Fibrinogen gamma chain OS=Homo sapiens GN=FGG PE=1 SV=3	FIBG_HUMAN	swissprot_2012.fasta	51513.3	100.0%	15	21	26	0.185%	34.7%	TSTADYAMFK	R	V	99.7%	48.3	26.1	35.8	2.39	0	1	0	0	2	1134.51			35303.8	283	292	Empty	true
Exp1_01	Fibrinogen gamma chain OS=Homo sapiens GN=FGG PE=1 SV=3	FIBG_HUMAN	swissprot_2012.fasta	51513.3	100.0%	15	21	26	0.185%	34.7%	VELEDWNGR	R	T	99.7%	44.6	27.3	25.1	2.82	0	1	0	0	2	1117.53			22756.8	274	282	Empty	true
Exp1_01	Fibrinogen gamma chain OS=Homo sapiens GN=FGG PE=1 SV=3	FIBG_HUMAN	swissprot_2012.fasta	51513.3	100.0%	15	21	26	0.185%	34.7%	VGPEADKYR	K	L	99.7%	65.3	29.0	42.7	1.77	0	1	0	0	2	1034.53			81908.6	293	301	Empty	true
Exp1_01	Fibrinogen gamma chain OS=Homo sapiens GN=FGG PE=1 SV=3	FIBG_HUMAN	swissprot_2012.fasta	51513.3	100.0%	15	21	26	0.185%	34.7%	YEASILTHDSSIR	K	Y	99.7%	52.1	30.0	33.8	2.54	0	0	2	0	2	1491.74			376241	122	134	Empty	true
Exp1_01	Fibrinogen gamma chain OS=Homo sapiens GN=FGG PE=1 SV=3	FIBG_HUMAN	swissprot_2012.fasta	51513.3	100.0%	15	21	26	0.185%	34.7%	YLQEIYNSNNQK	R	I	99.7%	78.2	28.4	56.9	4.10	0	3	0	0	2	1513.73			158145	135	146	Empty	true
Exp1_01	Keratin type II cytoskeletal 2 epidermal OS=Homo sapiens GN=KRT2 PE=1 SV=2	K22E_HUMAN	swissprot_2012.fasta	65433.9	100.0%	23	29	30	0.214%	64.3%	AQYEEIAQR	K	S	99.7%	69.3	28.8	53.7	2.29	0	1	0	0	2	1107.54			30535.7	354	362	Empty	true	K2C6A_HUMANK2C4_HUMANK2C6C_HUMAN
Exp1_01	Keratin type II cytoskeletal 2 epidermal OS=Homo sapiens GN=KRT2 PE=1 SV=2	K22E_HUMAN	swissprot_2012.fasta	65433.9	100.0%	23	29	30	0.214%	64.3%	DVDNAYMIK	K	V	99.3%	41.7	25.0	31.3	0.000	0	2	0	0	2	1084.5			20815.4	288	296	Empty	true
Exp1_01	Keratin type II cytoskeletal 2 epidermal OS=Homo sapiens GN=KRT2 PE=1 SV=2	K22E_HUMAN	swissprot_2012.fasta	65433.9	100.0%	23	29	30	0.214%	64.3%	FASFIDK	K	V	99.0%	29.3	26.3	0.000	2.29	0	1	0	0	2	8274298			22757.3	189	195	Empty	false	K2C73_HUMANK2C6A_HUMANK2C4_HUMANK2C6C_HUMANK2C1_HUMANK2C5_HUMAN
Exp1_01	Keratin type II cytoskeletal 2 epidermal OS=Homo sapiens GN=KRT2 PE=1 SV=2	K22E_HUMAN	swissprot_2012.fasta	65433.9	100.0%	23	29	30	0.214%	64.3%	FASFIDKVR	K	F	99.7%	43.3	25.7	0.000	2.89	0	1	0	0	2	1082.6			18109.7	189	197	Empty	false	K2C73_HUMANK2C6A_HUMANK2C6C_HUMANK2C1_HUMANK2C5_HUMAN
Exp1_01	Keratin type II cytoskeletal 2 epidermal OS=Homo sapiens GN=KRT2 PE=1 SV=2	K22E_HUMAN	swissprot_2012.fasta	65433.9	100.0%	23	29	30	0.214%	64.3%	FGGFGGPGGVGGLGGPGGFGPGGYPGGIHEVSVNQSLLQPLNVK	R	V	99.7%	72.6	27.5	72.6	8.00	0	0	1	0	2	4092.07			8500.79	123	166	Empty	true
Exp1_01	Keratin type II cytoskeletal 2 epidermal OS=Homo sapiens GN=KRT2 PE=1 SV=2	K22E_HUMAN	swissprot_2012.fasta	65433.9	100.0%	23	29	30	0.214%	64.3%	FLEQQNQVLQTK	R	W	99.7%	75.6	29.2	56.1	3.49	0	3	0	0	2	1475.79			140953	198	209	Empty	false	K2C1_HUMAN
Exp1_01	Keratin type II cytoskeletal 2 epidermal OS=Homo sapiens GN=KRT2 PE=1 SV=2	K22E_HUMAN	swissprot_2012.fasta	65433.9	100.0%	23	29	30	0.214%	64.3%	GEHALKDAR	R	N	99.4%	30.7	26.2	30.7	1.57	0	1	0	0	2	9965222			2414.58	431	439	Empty	true
Exp1_01	Keratin type II cytoskeletal 2 epidermal OS=Homo sapiens GN=KRT2 PE=1 SV=2	K22E_HUMAN	swissprot_2012.fasta	65433.9	100.0%	23	29	30	0.214%	64.3%	GFSSGSAVVSGGSR	R	R	99.7%	63.6	27.6	50.0	2.27	0	1	0	0	2	1254.61			11790.7	21	34	Empty	true
Exp1_01	Keratin type II cytoskeletal 2 epidermal OS=Homo sapiens GN=KRT2 PE=1 SV=2	K22E_HUMAN	swissprot_2012.fasta	65433.9	100.0%	23	29	30	0.214%	64.3%	GGGFGGGSSFGGGSGFSGGGFGGGGFGGGR	R	F	99.7%	154	25.0	154	10.4	0	1	1	0	2	2399.02			10125.3	93	122	Empty	true
Exp1_01	Keratin type II cytoskeletal 2 epidermal OS=Homo sapiens GN=KRT2 PE=1 SV=2	K22E_HUMAN	swissprot_2012.fasta	65433.9	100.0%	23	29	30	0.214%	64.3%	GGSGGGGSISGGGYGSGGGSGGR	R	Y	99.7%	109	25.0	109	9.68	0	1	1	0	2	1741.75			9671.18	550	572	Empty	true
Exp1_01	Keratin type II cytoskeletal 2 epidermal OS=Homo sapiens GN=KRT2 PE=1 SV=2	K22E_HUMAN	swissprot_2012.fasta	65433.9	100.0%	23	29	30	0.214%	64.3%	GGSISGGGYGSGGGK	K	H	99.7%	80.8	26.3	80.8	4.09	0	1	0	0	2	1197.55			24684.1	581	595	Empty	true
Exp1_01	Keratin type II cytoskeletal 2 epidermal OS=Homo sapiens GN=KRT2 PE=1 SV=2	K22E_HUMAN	swissprot_2012.fasta	65433.9	100.0%	23	29	30	0.214%	64.3%	GGSSSGGGYGSGGGGSSSVK	R	G	99.7%	80.4	25.0	80.4	3.89	0	1	0	0	2	1588.68			1583.14	604	623	Empty	true
Exp1_01	Keratin type II cytoskeletal 2 epidermal OS=Homo sapiens GN=KRT2 PE=1 SV=2	K22E_HUMAN	swissprot_2012.fasta	65433.9	100.0%	23	29	30	0.214%	64.3%	GSSSGGGYSSGSSSYGSGGR	R	Q	99.7%	98.8	25.0	98.8	4.16	0	1	0	0	2	1740.71			4374.65	525	544	Empty	true
Exp1_01	Keratin type II cytoskeletal 2 epidermal OS=Homo sapiens GN=KRT2 PE=1 SV=2	K22E_HUMAN	swissprot_2012.fasta	65433.9	100.0%	23	29	30	0.214%	64.3%	HGGGGGGFGGGGFGSR	R	S	99.7%	98.2	25.8	98.2	7.01	0	1	1	0	2	1320.58			200862	46	61	Empty	true
Exp1_01	Keratin type II cytoskeletal 2 epidermal OS=Homo sapiens GN=KRT2 PE=1 SV=2	K22E_HUMAN	swissprot_2012.fasta	65433.9	100.0%	23	29	30	0.214%	64.3%	IEISELNR	K	V	99.3%	46.7	29.7	23.1	0.000	0	1	0	0	2	9735313			56420.5	394	401	Empty	false	K2C1_HUMAN
Exp1_01	Keratin type II cytoskeletal 2 epidermal OS=Homo sapiens GN=KRT2 PE=1 SV=2	K22E_HUMAN	swissprot_2012.fasta	65433.9	100.0%	23	29	30	0.214%	64.3%	KYEDEINKR	K	T	99.7%	51.5	29.1	35.9	3.74	0	1	0	0	2	1194.61			12743.6	267	275	Empty	false	K2C6A_HUMANK2C6C_HUMANK2C1_HUMANK2C5_HUMAN
Exp1_01	Keratin type II cytoskeletal 2 epidermal OS=Homo sapiens GN=KRT2 PE=1 SV=2	K22E_HUMAN	swissprot_2012.fasta	65433.9	100.0%	23	29	30	0.214%	64.3%	LALDVEIATYR	K	K	99.7%	72.5	26.7	28.9	5.70	0	1	0	0	2	1263.69			9234.07	471	481	Empty	true	K2C6A_HUMANK2C6C_HUMANK2C5_HUMAN
Exp1_01	Keratin type II cytoskeletal 2 epidermal OS=Homo sapiens GN=KRT2 PE=1 SV=2	K22E_HUMAN	swissprot_2012.fasta	65433.9	100.0%	23	29	30	0.214%	64.3%	LNDLEEALQQAK	K	E	99.7%	71.9	29.2	59.4	3.35	0	1	0	0	2	1371.71			51016.3	442	453	Empty	true
Exp1_01	Keratin type II cytoskeletal 2 epidermal OS=Homo sapiens GN=KRT2 PE=1 SV=2	K22E_HUMAN	swissprot_2012.fasta	65433.9	100.0%	23	29	30	0.214%	64.3%	LQGEIAHVK	R	K	99.7%	32.6	25.0	20.5	1.85	0	1	0	0	2	9945681			9248.21	406	414	Empty	true
Exp1_01	Keratin type II cytoskeletal 2 epidermal OS=Homo sapiens GN=KRT2 PE=1 SV=2	K22E_HUMAN	swissprot_2012.fasta	65433.9	100.0%	23	29	30	0.214%	64.3%	NKLNDLEEALQQAK	R	E	99.7%	88.9	29.4	76.4	3.47	0	1	1	0	2	1613.85			48211.7	440	453	Empty	true
Exp1_01	Keratin type II cytoskeletal 2 epidermal OS=Homo sapiens GN=KRT2 PE=1 SV=2	K22E_HUMAN	swissprot_2012.fasta	65433.9	100.0%	23	29	30	0.214%	64.3%	SKEEAEALYHSKYEELQVTVGR	R	H	99.7%	49.6	30.1	49.6	1.11	0	0	0	1	2	2566.28			23822.5	363	384	Empty	true
Exp1_01	Keratin type II cytoskeletal 2 epidermal OS=Homo sapiens GN=KRT2 PE=1 SV=2	K22E_HUMAN	swissprot_2012.fasta	65433.9	100.0%	23	29	30	0.214%	64.3%	TAAENDFVTLKK	R	D	96.6%	38.2	27.9	38.2	0.000	0	1	0	0	2	1336.71			56982.2	276	287	Empty	true
Exp1_01	Keratin type II cytoskeletal 2 epidermal OS=Homo sapiens GN=KRT2 PE=1 SV=2	K22E_HUMAN	swissprot_2012.fasta	65433.9	100.0%	23	29	30	0.214%	64.3%	TSQNSELNNMQDLVEDYKK	R	K	99.7%	51.1	28.8	51.1	2.51	0	0	2	0	2	2256.05			138985	248	266	Empty	true
Exp1_01	Keratin type II cytoskeletal 2 epidermal OS=Homo sapiens GN=KRT2 PE=1 SV=2	K22E_HUMAN	swissprot_2012.fasta	65433.9	100.0%	23	29	30	0.214%	64.3%	VDLLNQEIEFLK	K	V	99.7%	71.7	27.2	47.8	3.24	0	1	0	0	2	1460.8			1876.02	303	314	Empty	true
Exp1_01	Keratin type II cytoskeletal 2 epidermal OS=Homo sapiens GN=KRT2 PE=1 SV=2	K22E_HUMAN	swissprot_2012.fasta	65433.9	100.0%	23	29	30	0.214%	64.3%	VLYDAEISQIHQSVTDTNVILSMDNSR	K	N	99.7%	59.4	30.2	42.2	5.80	0	0	1	0	2	3048.49			4827.8	315	341	Empty	true
Exp1_01	Keratin type II cytoskeletal 2 epidermal OS=Homo sapiens GN=KRT2 PE=1 SV=2	K22E_HUMAN	swissprot_2012.fasta	65433.9	100.0%	23	29	30	0.214%	64.3%	WELLQQMNVGTRPINLEPIFQGYIDSLKR	K	Y	99.7%	39.3	27.0	39.3	1.96	0	0	0	1	2	3458.83			27941.1	210	238	Empty	true
Exp1_01	Keratin type II cytoskeletal 2 epidermal OS=Homo sapiens GN=KRT2 PE=1 SV=2	K22E_HUMAN	swissprot_2012.fasta	65433.9	100.0%	23	29	30	0.214%	64.3%	YEDEINKR	K	T	99.3%	31.4	27.2	31.4	2.68	0	1	0	0	2	1066.52			16202.5	268	275	Empty	false	K2C6A_HUMANK2C6C_HUMANK2C1_HUMANK2C5_HUMAN
Exp1_01	Keratin type II cytoskeletal 2 epidermal OS=Homo sapiens GN=KRT2 PE=1 SV=2	K22E_HUMAN	swissprot_2012.fasta	65433.9	100.0%	23	29	30	0.214%	64.3%	YEELQVTVGR	K	H	99.7%	52.8	28.8	32.6	1.44	0	2	0	0	2	1193.62			50873.6	375	384	Empty	true
Exp1_01	Keratin type II cytoskeletal 2 epidermal OS=Homo sapiens GN=KRT2 PE=1 SV=2	K22E_HUMAN	swissprot_2012.fasta	65433.9	100.0%	23	29	30	0.214%	64.3%	YLDGLTAER	R	T	99.7%	59.7	28.0	36.7	3.00	0	1	0	0	2	1037.53			59731.5	239	247	Empty	true
Exp1_01	Apolipoprotein A-IV OS=Homo sapiens GN=APOA4 PE=1 SV=3	APOA4_HUMAN	swissprot_2012.fasta	45399.4	100.0%	27	35	36	0.257%	63.4%	AKIDQNVEELKGR	K	L	99.7%	58.4	28.5	35.9	1.33	0	0	1	0	2	1499.82			42729.6	188	200	Empty	true
Exp1_01	Apolipoprotein A-IV OS=Homo sapiens GN=APOA4 PE=1 SV=3	APOA4_HUMAN	swissprot_2012.fasta	45399.4	100.0%	27	35	36	0.257%	63.4%	ALVQQMEQLR	K	Q	99.7%	43.0	29.7	30.0	2.14	0	1	0	0	2	1215.65			44944.1	317	326	Empty	true
Exp1_01	Apolipoprotein A-IV OS=Homo sapiens GN=APOA4 PE=1 SV=3	APOA4_HUMAN	swissprot_2012.fasta	45399.4	100.0%	27	35	36	0.257%	63.4%	DKVNSFFSTFK	R	E	99.7%	54.2	29.6	31.5	3.85	0	1	1	0	2	1319.66			37983.9	349	359	Empty	true
Exp1_01	Apolipoprotein A-IV OS=Homo sapiens GN=APOA4 PE=1 SV=3	APOA4_HUMAN	swissprot_2012.fasta	45399.4	100.0%	27	35	36	0.257%	63.4%	EAVEHLQK	K	S	99.7%	39.3	25.4	23.2	1.55	0	1	0	0	2	9535051			23078.5	44	51	Empty	true
Exp1_01	Apolipoprotein A-IV OS=Homo sapiens GN=APOA4 PE=1 SV=3	APOA4_HUMAN	swissprot_2012.fasta	45399.4	100.0%	27	35	36	0.257%	63.4%	ENADSLQASLRPHADELK	R	A	99.5%	44.9	29.6	44.9	0.000	0	0	1	0	2	1993.99			137303	170	187	Empty	true
Exp1_01	Apolipoprotein A-IV OS=Homo sapiens GN=APOA4 PE=1 SV=3	APOA4_HUMAN	swissprot_2012.fasta	45399.4	100.0%	27	35	36	0.257%	63.4%	IDQNVEELK	K	G	99.7%	58.4	28.7	33.2	1.40	0	1	0	0	2	1087.56			19470.9	190	198	Empty	true
Exp1_01	Apolipoprotein A-IV OS=Homo sapiens GN=APOA4 PE=1 SV=3	APOA4_HUMAN	swissprot_2012.fasta	45399.4	100.0%	27	35	36	0.257%	63.4%	IDQNVEELKGR	K	L	99.7%	74.8	29.6	49.0	0.000	0	1	1	0	2	1300.69			6928.26	190	200	Empty	true
Exp1_01	Apolipoprotein A-IV OS=Homo sapiens GN=APOA4 PE=1 SV=3	APOA4_HUMAN	swissprot_2012.fasta	45399.4	100.0%	27	35	36	0.257%	63.4%	IDQTVEELR	K	R	99.7%	61.1	30.4	28.8	1.33	0	1	0	0	2	1102.57			24301.3	212	220	Empty	true
Exp1_01	Apolipoprotein A-IV OS=Homo sapiens GN=APOA4 PE=1 SV=3	APOA4_HUMAN	swissprot_2012.fasta	45399.4	100.0%	27	35	36	0.257%	63.4%	ISASAEELR	R	Q	99.7%	58.0	28.8	35.5	0.000	0	1	0	0	2	9755105			13874.1	256	264	Empty	true
Exp1_01	Apolipoprotein A-IV OS=Homo sapiens GN=APOA4 PE=1 SV=3	APOA4_HUMAN	swissprot_2012.fasta	45399.4	100.0%	27	35	36	0.257%	63.4%	KLVPFATELHER	K	L	99.7%	66.6	26.1	50.8	4.19	0	0	1	0	2	1439.8			82752	79	90	Empty	true
Exp1_01	Apolipoprotein A-IV OS=Homo sapiens GN=APOA4 PE=1 SV=3	APOA4_HUMAN	swissprot_2012.fasta	45399.4	100.0%	27	35	36	0.257%	63.4%	LAPLAEDVR	R	G	99.7%	35.2	25.0	35.2	3.72	0	1	0	0	2	9835521			37136.9	267	275	Empty	true
Exp1_01	Apolipoprotein A-IV OS=Homo sapiens GN=APOA4 PE=1 SV=3	APOA4_HUMAN	swissprot_2012.fasta	45399.4	100.0%	27	35	36	0.257%	63.4%	LGEVNTYAGDLQK	K	K	99.7%	69.6	29.3	69.6	1.77	0	2	0	0	2	1407.71			30726.9	66	78	Empty	true
Exp1_01	Apolipoprotein A-IV OS=Homo sapiens GN=APOA4 PE=1 SV=3	APOA4_HUMAN	swissprot_2012.fasta	45399.4	100.0%	27	35	36	0.257%	63.4%	LGPHAGDVEGHLSFLEK	K	D	99.7%	59.5	29.8	48.2	4.23	0	0	1	2	2	1805.92			220034	329	345	Empty	true
Exp1_01	Apolipoprotein A-IV OS=Homo sapiens GN=APOA4 PE=1 SV=3	APOA4_HUMAN	swissprot_2012.fasta	45399.4	100.0%	27	35	36	0.257%	63.4%	LKEEIGKELEELR	K	A	99.7%	42.3	27.8	29.0	1.64	0	0	1	0	2	1585.88			106530	98	110	Empty	true
Exp1_01	Apolipoprotein A-IV OS=Homo sapiens GN=APOA4 PE=1 SV=3	APOA4_HUMAN	swissprot_2012.fasta	45399.4	100.0%	27	35	36	0.257%	63.4%	LLPHANEVSQK	R	I	99.7%	54.5	27.9	35.8	2.36	0	1	0	0	2	1235.67			24699.1	113	123	Empty	true
Exp1_01	Apolipoprotein A-IV OS=Homo sapiens GN=APOA4 PE=1 SV=3	APOA4_HUMAN	swissprot_2012.fasta	45399.4	100.0%	27	35	36	0.257%	63.4%	LNHQLEGLTFQMK	K	K	99.7%	60.8	29.5	60.8	5.77	0	1	1	0	2	1558.8			38274.1	234	246	Empty	true
Exp1_01	Apolipoprotein A-IV OS=Homo sapiens GN=APOA4 PE=1 SV=3	APOA4_HUMAN	swissprot_2012.fasta	45399.4	100.0%	27	35	36	0.257%	63.4%	NAEELKAR	K	I	96.0%	38.8	29.1	27.2	0.000	0	1	0	0	2	9305003			7252.34	248	255	Empty	true
Exp1_01	Apolipoprotein A-IV OS=Homo sapiens GN=APOA4 PE=1 SV=3	APOA4_HUMAN	swissprot_2012.fasta	45399.4	100.0%	27	35	36	0.257%	63.4%	QLTPYAQR	R	M	99.7%	37.3	27.9	13.9	1.29	0	1	0	0	2	9765211			7892.37	156	163	Empty	true
Exp1_01	Apolipoprotein A-IV OS=Homo sapiens GN=APOA4 PE=1 SV=3	APOA4_HUMAN	swissprot_2012.fasta	45399.4	100.0%	27	35	36	0.257%	63.4%	RVEPYGENFNK	R	A	98.4%	28.2	29.2	15.8	1.39	0	1	1	0	2	1352.66			16145	306	316	Empty	true
Exp1_01	Apolipoprotein A-IV OS=Homo sapiens GN=APOA4 PE=1 SV=3	APOA4_HUMAN	swissprot_2012.fasta	45399.4	100.0%	27	35	36	0.257%	63.4%	SELTQQLNALFQDK	K	L	99.7%	105	29.7	93.5	4.92	0	1	0	0	2	1634.84			61995.5	52	65	Empty	true
Exp1_01	Apolipoprotein A-IV OS=Homo sapiens GN=APOA4 PE=1 SV=3	APOA4_HUMAN	swissprot_2012.fasta	45399.4	100.0%	27	35	36	0.257%	63.4%	SLAELGGHLDQQVEEFR	K	R	99.7%	81.1	29.4	52.6	5.92	0	1	1	0	2	1927.95			27340.6	288	304	Empty	true
Exp1_01	Apolipoprotein A-IV OS=Homo sapiens GN=APOA4 PE=1 SV=3	APOA4_HUMAN	swissprot_2012.fasta	45399.4	100.0%	27	35	36	0.257%	63.4%	SLAELGGHLDQQVEEFRR	K	R	99.7%	46.1	29.9	33.5	2.68	0	0	1	1	2	2084.05			213009	288	305	Empty	true
Exp1_01	Apolipoprotein A-IV OS=Homo sapiens GN=APOA4 PE=1 SV=3	APOA4_HUMAN	swissprot_2012.fasta	45399.4	100.0%	27	35	36	0.257%	63.4%	SLAPYAQDTQEK	R	L	99.7%	42.7	29.2	28.3	3.68	0	1	0	0	2	1350.65			9537.82	222	233	Empty	true
Exp1_01	Apolipoprotein A-IV OS=Homo sapiens GN=APOA4 PE=1 SV=3	APOA4_HUMAN	swissprot_2012.fasta	45399.4	100.0%	27	35	36	0.257%	63.4%	TQVNTQAEQLR	R	R	99.7%	68.1	29.5	47.9	3.55	0	1	0	0	2	1287.67			25532.1	144	154	Empty	true
Exp1_01	Apolipoprotein A-IV OS=Homo sapiens GN=APOA4 PE=1 SV=3	APOA4_HUMAN	swissprot_2012.fasta	45399.4	100.0%	27	35	36	0.257%	63.4%	VEPYGENFNK	R	A	99.3%	27.5	27.5	14.1	2.96	0	1	0	0	2	1196.56			13293.5	307	316	Empty	true
Exp1_01	Apolipoprotein A-IV OS=Homo sapiens GN=APOA4 PE=1 SV=3	APOA4_HUMAN	swissprot_2012.fasta	45399.4	100.0%	27	35	36	0.257%	63.4%	VKIDQTVEELRR	K	S	96.2%	34.0	27.0	18.7	0.000	0	0	1	0	2	1485.84			136886	210	221	Empty	true
Exp1_01	Apolipoprotein A-IV OS=Homo sapiens GN=APOA4 PE=1 SV=3	APOA4_HUMAN	swissprot_2012.fasta	45399.4	100.0%	27	35	36	0.257%	63.4%	VNSFFSTFK	K	E	99.3%	46.5	29.3	27.8	0.000	0	1	0	0	2	1076.54			27129.8	351	359	Empty	true
Exp1_01	Alpha-2-macroglobulin OS=Homo sapiens GN=A2M PE=1 SV=3	A2MG_HUMAN	swissprot_2012.fasta	163290	100.0%	22	25	27	0.192%	21.5%	AAQVTIQSSGTFSSK	K	F	99.7%	98.9	28.8	84.2	5.80	0	2	0	0	2	1511.77			7175.37	1275	1289	Empty	true
Exp1_01	Alpha-2-macroglobulin OS=Homo sapiens GN=A2M PE=1 SV=3	A2MG_HUMAN	swissprot_2012.fasta	163290	100.0%	22	25	27	0.192%	21.5%	AFQPFFVELTMPYSVIR	R	G	99.7%	83.5	29.7	72.7	5.96	0	1	0	0	2	2045.06			9925.13	788	804	Empty	true
Exp1_01	Alpha-2-macroglobulin OS=Homo sapiens GN=A2M PE=1 SV=3	A2MG_HUMAN	swissprot_2012.fasta	163290	100.0%	22	25	27	0.192%	21.5%	AIGYLNTGYQR	K	Q	99.7%	53.3	27.3	53.3	4.24	0	1	0	0	2	1255.64			7194.33	1004	1014	Empty	true
Exp1_01	Alpha-2-macroglobulin OS=Homo sapiens GN=A2M PE=1 SV=3	A2MG_HUMAN	swissprot_2012.fasta	163290	100.0%	22	25	27	0.192%	21.5%	DTVIKPLLVEPEGLEK	K	E	99.7%	74.2	25.0	60.3	4.89	0	1	0	0	2	1780.01			4752.8	897	912	Empty	true
Exp1_01	Alpha-2-macroglobulin OS=Homo sapiens GN=A2M PE=1 SV=3	A2MG_HUMAN	swissprot_2012.fasta	163290	100.0%	22	25	27	0.192%	21.5%	FEVQVTVPK	K	I	95.7%	35.7	26.3	11.1	0.000	0	1	0	0	2	1046.59			6417.98	229	237	Empty	true
Exp1_01	Alpha-2-macroglobulin OS=Homo sapiens GN=A2M PE=1 SV=3	A2MG_HUMAN	swissprot_2012.fasta	163290	100.0%	22	25	27	0.192%	21.5%	GGVEDEVTLSAYITIALLEIPLTVTHPVVR	K	N	98.8%	32.0	25.0	32.0	0.000	0	0	0	1	2	3205.77			1719.75	1093	1122	Empty	true
Exp1_01	Alpha-2-macroglobulin OS=Homo sapiens GN=A2M PE=1 SV=3	A2MG_HUMAN	swissprot_2012.fasta	163290	100.0%	22	25	27	0.192%	21.5%	HYDGSYSTFGER	K	Y	99.7%	35.7	25.0	35.7	4.00	0	1	0	0	2	1418.6			6339.55	1020	1031	Empty	true
Exp1_01	Alpha-2-macroglobulin OS=Homo sapiens GN=A2M PE=1 SV=3	A2MG_HUMAN	swissprot_2012.fasta	163290	100.0%	22	25	27	0.192%	21.5%	IAQWQSFQLEGGLK	R	Q	99.7%	75.7	29.0	64.6	5.66	0	1	0	0	2	1604.84			1904.64	175	188	Empty	true
Exp1_01	Alpha-2-macroglobulin OS=Homo sapiens GN=A2M PE=1 SV=3	A2MG_HUMAN	swissprot_2012.fasta	163290	100.0%	22	25	27	0.192%	21.5%	LHTEAQIQEEGTVVELTGR	K	Q	99.7%	71.2	29.4	71.2	3.08	0	0	1	0	2	2110.08			13336.2	320	338	Empty	true
Exp1_01	Alpha-2-macroglobulin OS=Homo sapiens GN=A2M PE=1 SV=3	A2MG_HUMAN	swissprot_2012.fasta	163290	100.0%	22	25	27	0.192%	21.5%	LLLQQVSLPELPGEYSMK	R	V	99.7%	37.9	27.0	37.9	3.34	0	1	0	0	2	2045.1			5598.4	1298	1315	Empty	true
Exp1_01	Alpha-2-macroglobulin OS=Homo sapiens GN=A2M PE=1 SV=3	A2MG_HUMAN	swissprot_2012.fasta	163290	100.0%	22	25	27	0.192%	21.5%	LPPNVVEESAR	K	A	99.7%	56.9	27.0	56.9	3.24	0	2	0	0	2	1210.64			17578.6	935	945	Empty	true
Exp1_01	Alpha-2-macroglobulin OS=Homo sapiens GN=A2M PE=1 SV=3	A2MG_HUMAN	swissprot_2012.fasta	163290	100.0%	22	25	27	0.192%	21.5%	LVHVEEPHTETVRK	R	Y	98.9%	36.1	29.0	24.1	0.000	0	0	0	1	2	1673.9			39717.9	720	733	Empty	true
Exp1_01	Alpha-2-macroglobulin OS=Homo sapiens GN=A2M PE=1 SV=3	A2MG_HUMAN	swissprot_2012.fasta	163290	100.0%	22	25	27	0.192%	21.5%	MVSGFIPLKPTVK	K	M	99.7%	40.8	25.0	22.3	2.74	0	1	1	0	2	1416.83			47111.6	1385	1397	Empty	true
Exp1_01	Alpha-2-macroglobulin OS=Homo sapiens GN=A2M PE=1 SV=3	A2MG_HUMAN	swissprot_2012.fasta	163290	100.0%	22	25	27	0.192%	21.5%	NEDSLVFVQTDK	K	S	99.7%	76.2	29.3	58.3	3.40	0	1	0	0	2	1394.68			35850.5	124	135	Empty	true
Exp1_01	Alpha-2-macroglobulin OS=Homo sapiens GN=A2M PE=1 SV=3	A2MG_HUMAN	swissprot_2012.fasta	163290	100.0%	22	25	27	0.192%	21.5%	QQNAQGGFSSTQDTVVALHALSK	K	Y	99.7%	75.3	30.1	75.3	2.15	0	0	1	0	2	2387.2			26830.7	1241	1263	Empty	true
Exp1_01	Alpha-2-macroglobulin OS=Homo sapiens GN=A2M PE=1 SV=3	A2MG_HUMAN	swissprot_2012.fasta	163290	100.0%	22	25	27	0.192%	21.5%	SASNMAIVDVK	R	M	99.7%	68.5	29.4	52.1	1.40	0	1	0	0	2	1134.58			26584.1	1374	1384	Empty	true
Exp1_01	Alpha-2-macroglobulin OS=Homo sapiens GN=A2M PE=1 SV=3	A2MG_HUMAN	swissprot_2012.fasta	163290	100.0%	22	25	27	0.192%	21.5%	SSGSLLNNAIK	R	G	99.3%	31.8	27.5	13.6	2.34	0	1	0	0	2	1103.61			15232.5	1082	1092	Empty	true
Exp1_01	Alpha-2-macroglobulin OS=Homo sapiens GN=A2M PE=1 SV=3	A2MG_HUMAN	swissprot_2012.fasta	163290	100.0%	22	25	27	0.192%	21.5%	TAQEGDHGSHVYTK	K	A	99.7%	65.6	26.9	65.6	5.39	0	1	1	0	2	1529.7			79786.1	1134	1147	Empty	true
Exp1_01	Alpha-2-macroglobulin OS=Homo sapiens GN=A2M PE=1 SV=3	A2MG_HUMAN	swissprot_2012.fasta	163290	100.0%	22	25	27	0.192%	21.5%	TEHPFTVEEFVLPK	R	F	99.7%	65.3	30.3	65.3	5.82	0	1	1	0	2	1672.86			40702.7	215	228	Empty	true
Exp1_01	Alpha-2-macroglobulin OS=Homo sapiens GN=A2M PE=1 SV=3	A2MG_HUMAN	swissprot_2012.fasta	163290	100.0%	22	25	27	0.192%	21.5%	TEVSSNHVLIYLDK	R	V	99.7%	62.0	29.4	50.9	8.62	0	1	0	0	2	1617.85			17394.7	1408	1421	Empty	true
Exp1_01	Alpha-2-macroglobulin OS=Homo sapiens GN=A2M PE=1 SV=3	A2MG_HUMAN	swissprot_2012.fasta	163290	100.0%	22	25	27	0.192%	21.5%	VGFYESDVMGR	R	G	99.7%	78.6	25.9	65.2	3.70	0	1	0	0	2	1259.57			81311.8	705	715	Empty	true
Exp1_01	Alpha-2-macroglobulin OS=Homo sapiens GN=A2M PE=1 SV=3	A2MG_HUMAN	swissprot_2012.fasta	163290	100.0%	22	25	27	0.192%	21.5%	YGAATFTR	K	T	97.4%	36.3	25.0	23.3	0.000	0	1	0	0	2	8864417			24794.6	1264	1271	Empty	true
Exp1_01	Myosin-9 OS=Homo sapiens GN=MYH9 PE=1 SV=4	MYH9_HUMAN	swissprot_2012.fasta	226538	100.0%	26	28	29	0.207%	16.1%	ALEEAMEQK	R	A	99.7%	54.8	27.8	41.6	2.21	0	1	0	0	2	1048.5			9837.66	1484	1492	Empty	true
Exp1_01	Myosin-9 OS=Homo sapiens GN=MYH9 PE=1 SV=4	MYH9_HUMAN	swissprot_2012.fasta	226538	100.0%	26	28	29	0.207%	16.1%	ALELDSNLYR	K	I	99.7%	39.2	28.4	26.4	3.82	0	1	0	0	2	1193.62			5533.24	746	755	Empty	true
Exp1_01	Myosin-9 OS=Homo sapiens GN=MYH9 PE=1 SV=4	MYH9_HUMAN	swissprot_2012.fasta	226538	100.0%	26	28	29	0.207%	16.1%	ASITALEAK	K	I	99.7%	50.3	28.0	27.5	2.44	0	1	0	0	2	9035146			16543.3	1807	1815	Empty	true
Exp1_01	Myosin-9 OS=Homo sapiens GN=MYH9 PE=1 SV=4	MYH9_HUMAN	swissprot_2012.fasta	226538	100.0%	26	28	29	0.207%	16.1%	ASREEILAQAK	R	E	99.7%	58.5	29.7	28.7	0.000	0	1	0	0	2	1215.67			5549.58	1659	1669	Empty	true
Exp1_01	Myosin-9 OS=Homo sapiens GN=MYH9 PE=1 SV=4	MYH9_HUMAN	swissprot_2012.fasta	226538	100.0%	26	28	29	0.207%	16.1%	DLEAHIDSANK	K	N	99.7%	48.8	27.0	48.8	3.89	0	1	0	0	2	1212.59			4328.6	1621	1631	Empty	true
Exp1_01	Myosin-9 OS=Homo sapiens GN=MYH9 PE=1 SV=4	MYH9_HUMAN	swissprot_2012.fasta	226538	100.0%	26	28	29	0.207%	16.1%	DLEGLSQR	K	H	95.0%	37.7	28.9	14.7	0.000	0	1	0	0	2	9174688			1108.16	1393	1400	Empty	true
Exp1_01	Myosin-9 OS=Homo sapiens GN=MYH9 PE=1 SV=4	MYH9_HUMAN	swissprot_2012.fasta	226538	100.0%	26	28	29	0.207%	16.1%	DLQGRDEQSEEK	R	K	98.8%	41.0	26.5	24.1	0.000	0	1	0	0	2	1433.65			2552.79	1572	1583	Empty	true
Exp1_01	Myosin-9 OS=Homo sapiens GN=MYH9 PE=1 SV=4	MYH9_HUMAN	swissprot_2012.fasta	226538	100.0%	26	28	29	0.207%	16.1%	ELEDATETADAMNR	R	E	99.7%	81.6	25.0	81.6	2.59	0	1	0	0	2	1565.67			3785.69	1899	1912	Empty	true
Exp1_01	Myosin-9 OS=Homo sapiens GN=MYH9 PE=1 SV=4	MYH9_HUMAN	swissprot_2012.fasta	226538	100.0%	26	28	29	0.207%	16.1%	FDQLLAEEK	K	T	99.7%	51.5	29.1	20.3	0.000	0	1	0	0	2	1092.56			8666.25	1446	1454	Empty	true
Exp1_01	Myosin-9 OS=Homo sapiens GN=MYH9 PE=1 SV=4	MYH9_HUMAN	swissprot_2012.fasta	226538	100.0%	26	28	29	0.207%	16.1%	HSQAVEELAEQLEQTKR	K	V	99.7%	58.1	29.8	41.9	1.82	0	0	1	1	2	1996.01			59927.8	1194	1210	Empty	true
Exp1_01	Myosin-9 OS=Homo sapiens GN=MYH9 PE=1 SV=4	MYH9_HUMAN	swissprot_2012.fasta	226538	100.0%	26	28	29	0.207%	16.1%	IAQLEEELEEEQGNTELINDR	R	L	99.7%	67.1	29.8	67.1	3.00	0	0	1	0	2	2472.17			4601.79	1731	1751	Empty	true
Exp1_01	Myosin-9 OS=Homo sapiens GN=MYH9 PE=1 SV=4	MYH9_HUMAN	swissprot_2012.fasta	226538	100.0%	26	28	29	0.207%	16.1%	IAQLEEQLDNETK	K	E	99.7%	84.4	29.8	72.8	4.44	0	1	0	0	2	1530.76			10049.9	1816	1828	Empty	true
Exp1_01	Myosin-9 OS=Homo sapiens GN=MYH9 PE=1 SV=4	MYH9_HUMAN	swissprot_2012.fasta	226538	100.0%	26	28	29	0.207%	16.1%	KANLQIDQINTDLNLER	K	S	99.7%	34.9	28.4	34.9	1.92	0	0	1	0	2	1998.06			8381.31	1754	1770	Empty	true
Exp1_01	Myosin-9 OS=Homo sapiens GN=MYH9 PE=1 SV=4	MYH9_HUMAN	swissprot_2012.fasta	226538	100.0%	26	28	29	0.207%	16.1%	KEEELQAALAR	K	V	99.4%	25.8	29.5	13.5	3.12	0	1	0	0	2	1257.68			20319.3	1081	1091	Empty	true
Exp1_01	Myosin-9 OS=Homo sapiens GN=MYH9 PE=1 SV=4	MYH9_HUMAN	swissprot_2012.fasta	226538	100.0%	26	28	29	0.207%	16.1%	KMEDSVGCLETAEEVK	K	R	98.0%	25.1	26.8	25.1	1.66	0	0	1	0	2	1825.82			19355.6	1372	1387	Empty	true
Exp1_01	Myosin-9 OS=Homo sapiens GN=MYH9 PE=1 SV=4	MYH9_HUMAN	swissprot_2012.fasta	226538	100.0%	26	28	29	0.207%	16.1%	LDPHLVLDQLR	K	C	99.7%	32.4	26.3	20.6	1.89	0	0	2	0	2	1318.75			11583.1	683	693	Empty	true
Exp1_01	Myosin-9 OS=Homo sapiens GN=MYH9 PE=1 SV=4	MYH9_HUMAN	swissprot_2012.fasta	226538	100.0%	26	28	29	0.207%	16.1%	LEVNLQAMK	R	A	95.7%	37.2	27.8	13.9	0.000	0	1	0	0	2	1045.57			40538	1558	1566	Empty	true
Exp1_01	Myosin-9 OS=Homo sapiens GN=MYH9 PE=1 SV=4	MYH9_HUMAN	swissprot_2012.fasta	226538	100.0%	26	28	29	0.207%	16.1%	LTEMETLQSQLMAEK	R	L	99.7%	86.6	29.7	71.1	4.11	0	1	1	0	2	1751.86			7951.15	868	882	Empty	true
Exp1_01	Myosin-9 OS=Homo sapiens GN=MYH9 PE=1 SV=4	MYH9_HUMAN	swissprot_2012.fasta	226538	100.0%	26	28	29	0.207%	16.1%	NAEQYKDQADK	R	A	99.7%	57.8	27.6	43.8	1.36	0	1	0	0	2	1309.6			3208.37	1857	1867	Empty	true
Exp1_01	Myosin-9 OS=Homo sapiens GN=MYH9 PE=1 SV=4	MYH9_HUMAN	swissprot_2012.fasta	226538	100.0%	26	28	29	0.207%	16.1%	NTDQASMPDNTAAQK	R	V	99.7%	72.7	25.6	57.6	4.32	0	1	0	0	2	1591.7			2026.58	359	373	Empty	true
Exp1_01	Myosin-9 OS=Homo sapiens GN=MYH9 PE=1 SV=4	MYH9_HUMAN	swissprot_2012.fasta	226538	100.0%	26	28	29	0.207%	16.1%	RGDLPFVVPR	R	R	99.7%	40.5	26.0	26.3	1.96	0	1	0	0	2	1155.66			2029.38	1923	1932	Empty	true
Exp1_01	Myosin-9 OS=Homo sapiens GN=MYH9 PE=1 SV=4	MYH9_HUMAN	swissprot_2012.fasta	226538	100.0%	26	28	29	0.207%	16.1%	TDLLLEPYNK	K	Y	99.7%	36.5	28.9	15.2	1.35	0	1	0	0	2	1205.64			1450.1	290	299	Empty	true
Exp1_01	Myosin-9 OS=Homo sapiens GN=MYH9 PE=1 SV=4	MYH9_HUMAN	swissprot_2012.fasta	226538	100.0%	26	28	29	0.207%	16.1%	THEAQIQEMR	K	Q	99.6%	33.0	26.5	33.0	3.20	0	1	0	0	2	1242.59			3551.95	1182	1191	Empty	true
Exp1_01	Myosin-9 OS=Homo sapiens GN=MYH9 PE=1 SV=4	MYH9_HUMAN	swissprot_2012.fasta	226538	100.0%	26	28	29	0.207%	16.1%	VIQYLAYVASSHK	K	S	99.7%	41.1	27.6	28.8	3.00	0	0	1	0	2	1478.8			6173.65	187	199	Empty	true
Exp1_01	Myosin-9 OS=Homo sapiens GN=MYH9 PE=1 SV=4	MYH9_HUMAN	swissprot_2012.fasta	226538	100.0%	26	28	29	0.207%	16.1%	VMQEQGTHPK	K	F	99.4%	45.0	27.1	45.0	0.000	0	1	0	0	2	1154.56			1828.9	546	555	Empty	true
Exp1_01	Myosin-9 OS=Homo sapiens GN=MYH9 PE=1 SV=4	MYH9_HUMAN	swissprot_2012.fasta	226538	100.0%	26	28	29	0.207%	16.1%	VSHLLGINVTDFTR	K	G	99.7%	34.7	29.1	34.7	2.44	0	0	1	0	2	1571.85			15432.9	374	387	Empty	true
Exp1_01	Alpha-1-antitrypsin OS=Homo sapiens GN=SERPINA1 PE=1 SV=3	A1AT_HUMAN	swissprot_2012.fasta	46737.9	100.0%	21	27	31	0.221%	50.5%	AVLTIDEK	K	G	99.7%	58.4	28.3	22.5	0.000	0	1	0	0	2	8885038			120375	360	367	Empty	true
Exp1_01	Alpha-1-antitrypsin OS=Homo sapiens GN=SERPINA1 PE=1 SV=3	A1AT_HUMAN	swissprot_2012.fasta	46737.9	100.0%	21	27	31	0.221%	50.5%	DTEEEDFHVDQVTTVK	K	V	99.7%	80.7	28.1	67.4	4.59	0	1	0	0	2	1891.86			7917.76	226	241	Empty	true
Exp1_01	Alpha-1-antitrypsin OS=Homo sapiens GN=SERPINA1 PE=1 SV=3	A1AT_HUMAN	swissprot_2012.fasta	46737.9	100.0%	21	27	31	0.221%	50.5%	ELDRDTVFALVNYIFFK	K	G	99.7%	67.8	28.8	55.3	6.21	0	1	1	0	2	2090.1			70848.5	199	215	Empty	true
Exp1_01	Alpha-1-antitrypsin OS=Homo sapiens GN=SERPINA1 PE=1 SV=3	A1AT_HUMAN	swissprot_2012.fasta	46737.9	100.0%	21	27	31	0.221%	50.5%	FLEDVKK	K	L	98.0%	37.5	25.0	15.5	0.000	0	1	0	0	2	8784983			18532.2	154	160	Empty	true
Exp1_01	Alpha-1-antitrypsin OS=Homo sapiens GN=SERPINA1 PE=1 SV=3	A1AT_HUMAN	swissprot_2012.fasta	46737.9	100.0%	21	27	31	0.221%	50.5%	FNKPFVFLMIEQNTK	K	S	99.7%	52.7	28.4	39.2	1.72	0	0	2	0	2	1855.98			107512	390	404	Empty	true
Exp1_01	Alpha-1-antitrypsin OS=Homo sapiens GN=SERPINA1 PE=1 SV=3	A1AT_HUMAN	swissprot_2012.fasta	46737.9	100.0%	21	27	31	0.221%	50.5%	GKWERPFEVKDTEEEDFHVDQVTTVK	K	V	99.7%	42.3	30.2	32.0	1.92	0	0	0	1	2	3148.52			28786.7	216	241	Empty	true
Exp1_01	Alpha-1-antitrypsin OS=Homo sapiens GN=SERPINA1 PE=1 SV=3	A1AT_HUMAN	swissprot_2012.fasta	46737.9	100.0%	21	27	31	0.221%	50.5%	GTEAAGAMFLEAIPMSIPPEVK	K	F	99.7%	48.7	29.8	36.1	4.59	0	1	0	0	2	2259.14			17043.4	368	389	Empty	true
Exp1_01	Alpha-1-antitrypsin OS=Homo sapiens GN=SERPINA1 PE=1 SV=3	A1AT_HUMAN	swissprot_2012.fasta	46737.9	100.0%	21	27	31	0.221%	50.5%	ITPNLAEFAFSLYR	K	Q	99.7%	70.2	29.1	59.2	4.96	0	1	0	0	2	1641.86			21780.5	50	63	Empty	true
Exp1_01	Alpha-1-antitrypsin OS=Homo sapiens GN=SERPINA1 PE=1 SV=3	A1AT_HUMAN	swissprot_2012.fasta	46737.9	100.0%	21	27	31	0.221%	50.5%	KLSSWVLLMK	K	Y	99.7%	46.9	25.0	25.5	1.72	0	1	1	0	2	1204.71			28027.5	258	267	Empty	true
Exp1_01	Alpha-1-antitrypsin OS=Homo sapiens GN=SERPINA1 PE=1 SV=3	A1AT_HUMAN	swissprot_2012.fasta	46737.9	100.0%	21	27	31	0.221%	50.5%	KLYHSEAFTVNFGDTEEAKK	K	Q	99.7%	53.9	30.0	53.9	1.57	0	0	0	1	2	2314.14			50717.2	160	179	Empty	true
Exp1_01	Alpha-1-antitrypsin OS=Homo sapiens GN=SERPINA1 PE=1 SV=3	A1AT_HUMAN	swissprot_2012.fasta	46737.9	100.0%	21	27	31	0.221%	50.5%	LQHLENELTHDIITK	K	F	99.7%	52.9	28.5	52.9	1.62	0	0	1	1	2	1803.96			344059	284	298	Empty	true
Exp1_01	Alpha-1-antitrypsin OS=Homo sapiens GN=SERPINA1 PE=1 SV=3	A1AT_HUMAN	swissprot_2012.fasta	46737.9	100.0%	21	27	31	0.221%	50.5%	LSSWVLLMK	K	Y	99.7%	55.5	25.9	43.6	0.000	0	1	0	0	2	1076.62			55411.2	259	267	Empty	true
Exp1_01	Alpha-1-antitrypsin OS=Homo sapiens GN=SERPINA1 PE=1 SV=3	A1AT_HUMAN	swissprot_2012.fasta	46737.9	100.0%	21	27	31	0.221%	50.5%	LVDKFLEDVK	K	K	98.0%	35.9	26.3	15.0	0.000	0	0	1	0	2	1205.68			33450.8	150	159	Empty	true
Exp1_01	Alpha-1-antitrypsin OS=Homo sapiens GN=SERPINA1 PE=1 SV=3	A1AT_HUMAN	swissprot_2012.fasta	46737.9	100.0%	21	27	31	0.221%	50.5%	LVDKFLEDVKK	K	L	99.7%	52.8	25.0	41.9	4.19	0	1	0	0	2	1333.77			8603.87	150	160	Empty	true
Exp1_01	Alpha-1-antitrypsin OS=Homo sapiens GN=SERPINA1 PE=1 SV=3	A1AT_HUMAN	swissprot_2012.fasta	46737.9	100.0%	21	27	31	0.221%	50.5%	LYHSEAFTVNFGDTEEAK	K	K	99.7%	36.2	28.8	21.8	2.68	0	0	1	0	2	2057.95			20916.8	161	178	Empty	true
Exp1_01	Alpha-1-antitrypsin OS=Homo sapiens GN=SERPINA1 PE=1 SV=3	A1AT_HUMAN	swissprot_2012.fasta	46737.9	100.0%	21	27	31	0.221%	50.5%	LYHSEAFTVNFGDTEEAKK	K	Q	99.7%	61.2	29.7	49.2	5.46	0	0	2	1	2	2186.04			34827.2	161	179	Empty	true
Exp1_01	Alpha-1-antitrypsin OS=Homo sapiens GN=SERPINA1 PE=1 SV=3	A1AT_HUMAN	swissprot_2012.fasta	46737.9	100.0%	21	27	31	0.221%	50.5%	SASLHLPK	R	L	99.7%	60.5	25.0	44.0	2.24	0	2	0	0	2	8524938			16646	307	314	Empty	true
Exp1_01	Alpha-1-antitrypsin OS=Homo sapiens GN=SERPINA1 PE=1 SV=3	A1AT_HUMAN	swissprot_2012.fasta	46737.9	100.0%	21	27	31	0.221%	50.5%	SVLGQLGITK	K	V	99.7%	68.4	25.0	54.5	2.85	0	1	0	0	2	1015.61			84071.3	325	334	Empty	true
Exp1_01	Alpha-1-antitrypsin OS=Homo sapiens GN=SERPINA1 PE=1 SV=3	A1AT_HUMAN	swissprot_2012.fasta	46737.9	100.0%	21	27	31	0.221%	50.5%	TDTSHHDQDHPTFNK	K	I	99.7%	44.6	25.2	44.6	3.31	0	1	1	0	2	1779.77			40107.3	35	49	Empty	true
Exp1_01	Alpha-1-antitrypsin OS=Homo sapiens GN=SERPINA1 PE=1 SV=3	A1AT_HUMAN	swissprot_2012.fasta	46737.9	100.0%	21	27	31	0.221%	50.5%	VFSNGADLSGVTEEAPLK	K	L	99.7%	121	30.0	106	8.35	0	3	0	0	2	1833.92			12556.8	335	352	Empty	true
Exp1_01	Alpha-1-antitrypsin OS=Homo sapiens GN=SERPINA1 PE=1 SV=3	A1AT_HUMAN	swissprot_2012.fasta	46737.9	100.0%	21	27	31	0.221%	50.5%	VFSNGADLSGVTEEAPLKLSK	K	A	99.7%	57.6	28.5	39.2	1.72	0	0	1	0	2	2162.13			36848.2	335	355	Empty	true
Exp1_01	Keratin type II cytoskeletal 1 OS=Homo sapiens GN=KRT1 PE=1 SV=6	K2C1_HUMAN	swissprot_2012.fasta	66040.3	100.0%	31	42	52	0.371%	54.0%	AEAESLYQSK	K	Y	99.7%	55.2	26.5	55.2	4.09	0	2	0	0	2	1125.54			11233.2	367	376	Empty	true
Exp1_01	Keratin type II cytoskeletal 1 OS=Homo sapiens GN=KRT1 PE=1 SV=6	K2C1_HUMAN	swissprot_2012.fasta	66040.3	100.0%	31	42	52	0.371%	54.0%	AQYEDIAQK	K	S	99.7%	45.7	27.5	45.7	1.92	0	1	0	0	2	1065.52			6597.35	356	364	Empty	true
Exp1_01	Keratin type II cytoskeletal 1 OS=Homo sapiens GN=KRT1 PE=1 SV=6	K2C1_HUMAN	swissprot_2012.fasta	66040.3	100.0%	31	42	52	0.371%	54.0%	DVDGAYMTK	K	V	99.7%	45.9	25.0	29.1	1.46	0	1	0	0	2	9994453			57747.9	290	298	Empty	true
Exp1_01	Keratin type II cytoskeletal 1 OS=Homo sapiens GN=KRT1 PE=1 SV=6	K2C1_HUMAN	swissprot_2012.fasta	66040.3	100.0%	31	42	52	0.371%	54.0%	DYQELMNTK	R	L	99.7%	41.1	25.0	41.1	1.46	0	2	0	0	2	1157.51			37721.6	464	472	Empty	true
Exp1_01	Keratin type II cytoskeletal 1 OS=Homo sapiens GN=KRT1 PE=1 SV=6	K2C1_HUMAN	swissprot_2012.fasta	66040.3	100.0%	31	42	52	0.371%	54.0%	FLEQQNQVLQTK	R	W	99.7%	75.6	29.2	56.1	3.49	0	3	0	0	2	1475.79			140953	200	211	Empty	true	K22E_HUMAN
Exp1_01	Keratin type II cytoskeletal 1 OS=Homo sapiens GN=KRT1 PE=1 SV=6	K2C1_HUMAN	swissprot_2012.fasta	66040.3	100.0%	31	42	52	0.371%	54.0%	GGGGGGYGSGGSSYGSGGGSYGSGGGGGGGR	R	G	99.7%	145	25.0	145	6.21	0	1	1	0	2	2383.95			16833.5	519	549	Empty	true
Exp1_01	Keratin type II cytoskeletal 1 OS=Homo sapiens GN=KRT1 PE=1 SV=6	K2C1_HUMAN	swissprot_2012.fasta	66040.3	100.0%	31	42	52	0.371%	54.0%	GSYGSGGSSYGSGGGSYGSGGGGGGHGSYGSGSSSGGYR	R	G	99.7%	157	25.0	157	2.60	0	0	1	0	2	3312.31			12558.5	550	588	Empty	true
Exp1_01	Keratin type II cytoskeletal 1 OS=Homo sapiens GN=KRT1 PE=1 SV=6	K2C1_HUMAN	swissprot_2012.fasta	66040.3	100.0%	31	42	52	0.371%	54.0%	IEISELNR	K	V	99.3%	46.7	29.7	23.1	0.000	0	1	0	0	2	9735313			56420.5	396	403	Empty	true	K22E_HUMAN
Exp1_01	Keratin type II cytoskeletal 1 OS=Homo sapiens GN=KRT1 PE=1 SV=6	K2C1_HUMAN	swissprot_2012.fasta	66040.3	100.0%	31	42	52	0.371%	54.0%	KYEDEINKR	N	T	99.7%	51.5	29.1	35.9	3.74	0	1	0	0	1	1194.61			12743.6	269	277	Empty	true	K22E_HUMANK2C6A_HUMANK2C6C_HUMANK2C5_HUMAN
Exp1_01	Keratin type II cytoskeletal 1 OS=Homo sapiens GN=KRT1 PE=1 SV=6	K2C1_HUMAN	swissprot_2012.fasta	66040.3	100.0%	31	42	52	0.371%	54.0%	LDNLQQEIDFLTALYQAELSQMQTQISETNVILSMDNNR	K	S	99.7%	111	28.6	111	8.80	0	0	1	0	2	4527.2			3463.97	305	343	Empty	true
Exp1_01	Keratin type II cytoskeletal 1 OS=Homo sapiens GN=KRT1 PE=1 SV=6	K2C1_HUMAN	swissprot_2012.fasta	66040.3	100.0%	31	42	52	0.371%	54.0%	LNDLEDALQQAK	K	E	99.7%	44.6	29.2	44.6	2.82	0	1	0	0	2	1357.7			25656.1	444	455	Empty	true
Exp1_01	Keratin type II cytoskeletal 1 OS=Homo sapiens GN=KRT1 PE=1 SV=6	K2C1_HUMAN	swissprot_2012.fasta	66040.3	100.0%	31	42	52	0.371%	54.0%	NKLNDLEDALQQAK	K	E	99.7%	81.0	29.5	67.9	5.15	0	1	1	0	2	1599.83			64607.4	442	455	Empty	true
Exp1_01	Keratin type II cytoskeletal 1 OS=Homo sapiens GN=KRT1 PE=1 SV=6	K2C1_HUMAN	swissprot_2012.fasta	66040.3	100.0%	31	42	52	0.371%	54.0%	NKLNDLEDALQQAKEDLAR	K	L	99.7%	57.8	28.9	44.6	2.54	0	0	1	1	2	2184.13			108581	442	460	Empty	true
Exp1_01	Keratin type II cytoskeletal 1 OS=Homo sapiens GN=KRT1 PE=1 SV=6	K2C1_HUMAN	swissprot_2012.fasta	66040.3	100.0%	31	42	52	0.371%	54.0%	NKYEDEINKR	R	T	99.7%	58.6	28.8	35.6	1.46	0	1	1	0	2	1308.65			221784	268	277	Empty	true	K2C6A_HUMANK2C6C_HUMANK2C5_HUMAN
Exp1_01	Keratin type II cytoskeletal 1 OS=Homo sapiens GN=KRT1 PE=1 SV=6	K2C1_HUMAN	swissprot_2012.fasta	66040.3	100.0%	31	42	52	0.371%	54.0%	NMQDMVEDYR	K	N	99.7%	83.0	25.0	83.0	3.46	0	3	0	0	2	1300.53			50871.7	258	267	Empty	true
Exp1_01	Keratin type II cytoskeletal 1 OS=Homo sapiens GN=KRT1 PE=1 SV=6	K2C1_HUMAN	swissprot_2012.fasta	66040.3	100.0%	31	42	52	0.371%	54.0%	QISNLQQSISDAEQRGENALK	K	D	99.7%	41.8	29.8	28.3	1.24	0	0	1	0	2	2329.17			13836.1	418	438	Empty	true
Exp1_01	Keratin type II cytoskeletal 1 OS=Homo sapiens GN=KRT1 PE=1 SV=6	K2C1_HUMAN	swissprot_2012.fasta	66040.3	100.0%	31	42	52	0.371%	54.0%	SEIDNVKK	R	Q	98.2%	41.3	28.5	23.1	0.000	0	1	0	0	2	9325048			29862.5	410	417	Empty	true
Exp1_01	Keratin type II cytoskeletal 1 OS=Homo sapiens GN=KRT1 PE=1 SV=6	K2C1_HUMAN	swissprot_2012.fasta	66040.3	100.0%	31	42	52	0.371%	54.0%	SGGGFSSGSAGIINYQR	R	R	99.7%	47.0	28.8	47.0	4.54	0	1	0	0	2	1657.79			3928.6	13	29	Empty	true
Exp1_01	Keratin type II cytoskeletal 1 OS=Homo sapiens GN=KRT1 PE=1 SV=6	K2C1_HUMAN	swissprot_2012.fasta	66040.3	100.0%	31	42	52	0.371%	54.0%	SKAEAESLYQSK	K	Y	99.7%	72.0	28.5	61.2	4.34	0	1	1	0	2	1340.67			91772.1	365	376	Empty	true
Exp1_01	Keratin type II cytoskeletal 1 OS=Homo sapiens GN=KRT1 PE=1 SV=6	K2C1_HUMAN	swissprot_2012.fasta	66040.3	100.0%	31	42	52	0.371%	54.0%	SLDLDSIIAEVK	R	A	99.7%	101	29.2	77.2	1.85	0	2	0	0	2	1302.72			161390	344	355	Empty	true
Exp1_01	Keratin type II cytoskeletal 1 OS=Homo sapiens GN=KRT1 PE=1 SV=6	K2C1_HUMAN	swissprot_2012.fasta	66040.3	100.0%	31	42	52	0.371%	54.0%	SLNNQFASFIDK	K	V	99.7%	59.9	28.4	34.8	1.64	0	2	0	0	2	1383.69			75346.2	186	197	Empty	true
Exp1_01	Keratin type II cytoskeletal 1 OS=Homo sapiens GN=KRT1 PE=1 SV=6	K2C1_HUMAN	swissprot_2012.fasta	66040.3	100.0%	31	42	52	0.371%	54.0%	SLNNQFASFIDKVR	K	F	99.7%	49.6	28.6	49.6	1.64	0	0	1	0	2	1638.86			276672	186	199	Empty	true
Exp1_01	Keratin type II cytoskeletal 1 OS=Homo sapiens GN=KRT1 PE=1 SV=6	K2C1_HUMAN	swissprot_2012.fasta	66040.3	100.0%	31	42	52	0.371%	54.0%	SLVNLGGSK	R	S	99.7%	56.3	28.4	42.5	2.01	0	1	0	0	2	8744993			168607	66	74	Empty	true
Exp1_01	Keratin type II cytoskeletal 1 OS=Homo sapiens GN=KRT1 PE=1 SV=6	K2C1_HUMAN	swissprot_2012.fasta	66040.3	100.0%	31	42	52	0.371%	54.0%	THNLEPYFESFINNLR	R	R	99.7%	77.6	29.6	63.1	4.38	0	1	2	0	2	1993.98			458727	224	239	Empty	true
Exp1_01	Keratin type II cytoskeletal 1 OS=Homo sapiens GN=KRT1 PE=1 SV=6	K2C1_HUMAN	swissprot_2012.fasta	66040.3	100.0%	31	42	52	0.371%	54.0%	THNLEPYFESFINNLRR	R	R	99.7%	38.5	30.1	20.6	2.08	0	0	0	2	2	2150.08			82553.8	224	240	Empty	true
Exp1_01	Keratin type II cytoskeletal 1 OS=Homo sapiens GN=KRT1 PE=1 SV=6	K2C1_HUMAN	swissprot_2012.fasta	66040.3	100.0%	31	42	52	0.371%	54.0%	TLLEGEESR	R	M	99.7%	48.4	28.9	17.3	2.43	0	1	0	0	2	1033.52			22791.7	484	492	Empty	true
Exp1_01	Keratin type II cytoskeletal 1 OS=Homo sapiens GN=KRT1 PE=1 SV=6	K2C1_HUMAN	swissprot_2012.fasta	66040.3	100.0%	31	42	52	0.371%	54.0%	TNAENEFVTIK	R	K	99.7%	55.9	29.3	37.0	4.30	0	1	0	0	2	1265.64			18504.5	278	288	Empty	true
Exp1_01	Keratin type II cytoskeletal 1 OS=Homo sapiens GN=KRT1 PE=1 SV=6	K2C1_HUMAN	swissprot_2012.fasta	66040.3	100.0%	31	42	52	0.371%	54.0%	TNAENEFVTIKK	R	D	99.7%	67.3	28.4	27.8	4.72	0	1	1	0	2	1393.73			102329	278	289	Empty	true
Exp1_01	Keratin type II cytoskeletal 1 OS=Homo sapiens GN=KRT1 PE=1 SV=6	K2C1_HUMAN	swissprot_2012.fasta	66040.3	100.0%	31	42	52	0.371%	54.0%	WELLQQVDTSTR	K	T	99.7%	71.7	29.6	71.7	5.04	0	2	0	0	2	1475.75			56035.4	212	223	Empty	true
Exp1_01	Keratin type II cytoskeletal 1 OS=Homo sapiens GN=KRT1 PE=1 SV=6	K2C1_HUMAN	swissprot_2012.fasta	66040.3	100.0%	31	42	52	0.371%	54.0%	YEDEINKR	K	T	99.3%	31.4	27.2	31.4	2.68	0	1	0	0	2	1066.52			16202.5	270	277	Empty	true	K22E_HUMANK2C6A_HUMANK2C6C_HUMANK2C5_HUMAN
Exp1_01	Keratin type II cytoskeletal 1 OS=Homo sapiens GN=KRT1 PE=1 SV=6	K2C1_HUMAN	swissprot_2012.fasta	66040.3	100.0%	31	42	52	0.371%	54.0%	YEELQITAGR	K	H	99.7%	66.5	29.0	0.000	2.77	0	4	0	0	2	1179.6			94164.5	377	386	Empty	true
Exp1_01	Apolipoprotein B-100 OS=Homo sapiens GN=APOB PE=1 SV=2	APOB_HUMAN	swissprot_2012.fasta	515615	100.0%	148	192	221	1.57%	39.4%	AALTELSLGSAYQAMILGVDSK	K	N	99.7%	121	28.6	111	10.3	0	1	0	0	2	2238.17			9733.29	1703	1724	Empty	true
Exp1_01	Apolipoprotein B-100 OS=Homo sapiens GN=APOB PE=1 SV=2	APOB_HUMAN	swissprot_2012.fasta	515615	100.0%	148	192	221	1.57%	39.4%	AASGTTGTYQEWK	K	D	99.7%	73.1	26.4	73.1	6.80	0	1	0	0	2	1399.65			8546.47	4133	4145	Empty	true
Exp1_01	Apolipoprotein B-100 OS=Homo sapiens GN=APOB PE=1 SV=2	APOB_HUMAN	swissprot_2012.fasta	515615	100.0%	148	192	221	1.57%	39.4%	AASGTTGTYQEWKDK	K	A	99.7%	54.8	28.1	43.9	3.70	0	1	0	0	2	1642.77			4672.03	4133	4147	Empty	true
Exp1_01	Apolipoprotein B-100 OS=Homo sapiens GN=APOB PE=1 SV=2	APOB_HUMAN	swissprot_2012.fasta	515615	100.0%	148	192	221	1.57%	39.4%	ADSVVDLLSYNVQGSGETTYDHK	K	N	99.7%	95.0	29.4	95.0	1.89	0	0	2	0	2	2498.17			27529.6	1393	1415	Empty	true
Exp1_01	Apolipoprotein B-100 OS=Homo sapiens GN=APOB PE=1 SV=2	APOB_HUMAN	swissprot_2012.fasta	515615	100.0%	148	192	221	1.57%	39.4%	AEPLAFTFSHDYK	K	G	99.7%	51.8	28.4	51.8	4.92	0	1	1	0	2	1525.73			25303.4	1935	1947	Empty	true
Exp1_01	Apolipoprotein B-100 OS=Homo sapiens GN=APOB PE=1 SV=2	APOB_HUMAN	swissprot_2012.fasta	515615	100.0%	148	192	221	1.57%	39.4%	AHLDIAGSLEGHLR	K	F	99.7%	86.8	29.3	86.8	7.29	0	1	5	0	2	1488.79			80394.1	3657	3670	Empty	true
Exp1_01	Apolipoprotein B-100 OS=Homo sapiens GN=APOB PE=1 SV=2	APOB_HUMAN	swissprot_2012.fasta	515615	100.0%	148	192	221	1.57%	39.4%	ALVEQGFTVPEIK	K	T	99.7%	44.2	27.5	25.7	3.32	0	1	0	0	2	1430.79			10799.7	2579	2591	Empty	true
Exp1_01	Apolipoprotein B-100 OS=Homo sapiens GN=APOB PE=1 SV=2	APOB_HUMAN	swissprot_2012.fasta	515615	100.0%	148	192	221	1.57%	39.4%	ALYWVNGQVPDGVSK	K	V	99.7%	68.6	29.8	68.6	5.41	0	5	0	0	2	1632.84			122041	718	732	Empty	true
Exp1_01	Apolipoprotein B-100 OS=Homo sapiens GN=APOB PE=1 SV=2	APOB_HUMAN	swissprot_2012.fasta	515615	100.0%	148	192	221	1.57%	39.4%	AQIPILR	K	M	99.4%	29.7	25.0	0.000	2.02	0	1	0	0	2	8105197			101236	3431	3437	Empty	true
Exp1_01	Apolipoprotein B-100 OS=Homo sapiens GN=APOB PE=1 SV=2	APOB_HUMAN	swissprot_2012.fasta	515615	100.0%	148	192	221	1.57%	39.4%	ATGVLYDYVNK	K	Y	99.7%	55.2	28.1	42.3	2.51	0	1	1	0	2	1242.64			23399.6	4077	4087	Empty	true
Exp1_01	Apolipoprotein B-100 OS=Homo sapiens GN=APOB PE=1 SV=2	APOB_HUMAN	swissprot_2012.fasta	515615	100.0%	148	192	221	1.57%	39.4%	ATLYALSHAVNNYHK	R	T	99.7%	53.3	29.5	53.3	3.15	0	1	2	0	2	1701.87			84205.9	440	454	Empty	true
Exp1_01	Apolipoprotein B-100 OS=Homo sapiens GN=APOB PE=1 SV=2	APOB_HUMAN	swissprot_2012.fasta	515615	100.0%	148	192	221	1.57%	39.4%	AVSMPSFSILGSDVR	K	V	99.7%	116	29.0	102	4.89	0	1	0	0	2	1565.8			369752	3277	3291	Empty	true
Exp1_01	Apolipoprotein B-100 OS=Homo sapiens GN=APOB PE=1 SV=2	APOB_HUMAN	swissprot_2012.fasta	515615	100.0%	148	192	221	1.57%	39.4%	DAVEKPQEFTIVAFVK	R	Y	99.7%	58.0	27.2	47.0	4.19	0	0	1	0	2	1820.98			42248	2044	2059	Empty	true
Exp1_01	Apolipoprotein B-100 OS=Homo sapiens GN=APOB PE=1 SV=2	APOB_HUMAN	swissprot_2012.fasta	515615	100.0%	148	192	221	1.57%	39.4%	DDKHEQDMVNGIMLSVEK	K	L	99.7%	61.2	29.1	61.2	4.08	0	0	1	0	2	2087.97			132761	743	760	Empty	true
Exp1_01	Apolipoprotein B-100 OS=Homo sapiens GN=APOB PE=1 SV=2	APOB_HUMAN	swissprot_2012.fasta	515615	100.0%	148	192	221	1.57%	39.4%	DFSAEYEEDGKYEGLQEWEGK	R	A	99.7%	67.2	25.0	67.2	4.70	0	0	2	0	2	2509.07			12529.3	3953	3973	Empty	true
Exp1_01	Apolipoprotein B-100 OS=Homo sapiens GN=APOB PE=1 SV=2	APOB_HUMAN	swissprot_2012.fasta	515615	100.0%	148	192	221	1.57%	39.4%	DKDQEVLLQTFLDDASPGDKR	K	L	99.7%	98.3	30.3	83.2	4.27	0	0	1	1	2	2390.18			692554	538	558	Empty	true
Exp1_01	Apolipoprotein B-100 OS=Homo sapiens GN=APOB PE=1 SV=2	APOB_HUMAN	swissprot_2012.fasta	515615	100.0%	148	192	221	1.57%	39.4%	DKIGVELTGR	K	T	99.7%	47.5	27.6	30.8	1.82	0	1	0	0	2	1087.61			73369.6	2003	2012	Empty	true
Exp1_01	Apolipoprotein B-100 OS=Homo sapiens GN=APOB PE=1 SV=2	APOB_HUMAN	swissprot_2012.fasta	515615	100.0%	148	192	221	1.57%	39.4%	DLKVEDIPLAR	R	I	99.7%	51.0	25.0	31.0	0.000	0	2	2	0	2	1268.72			340500	2695	2705	Empty	true
Exp1_01	Apolipoprotein B-100 OS=Homo sapiens GN=APOB PE=1 SV=2	APOB_HUMAN	swissprot_2012.fasta	515615	100.0%	148	192	221	1.57%	39.4%	DNVFDGLVR	K	V	99.7%	53.6	28.7	33.1	2.24	0	1	0	0	2	1034.53			12170.6	4169	4177	Empty	true
Exp1_01	Apolipoprotein B-100 OS=Homo sapiens GN=APOB PE=1 SV=2	APOB_HUMAN	swissprot_2012.fasta	515615	100.0%	148	192	221	1.57%	39.4%	DSYDLHDLK	K	I	99.7%	37.9	27.5	25.3	2.07	0	1	0	0	2	1105.52			10146.8	2187	2195	Empty	true
Exp1_01	Apolipoprotein B-100 OS=Homo sapiens GN=APOB PE=1 SV=2	APOB_HUMAN	swissprot_2012.fasta	515615	100.0%	148	192	221	1.57%	39.4%	EFNLQNMGLPDFHIPENLFLK	K	S	99.7%	42.6	30.3	31.2	1.42	0	0	1	0	2	2516.26			142825	1260	1280	Empty	true
Exp1_01	Apolipoprotein B-100 OS=Homo sapiens GN=APOB PE=1 SV=2	APOB_HUMAN	swissprot_2012.fasta	515615	100.0%	148	192	221	1.57%	39.4%	ENFAGEATLQR	K	I	99.7%	59.4	29.1	46.6	2.47	0	1	0	0	2	1235.6			9348.22	3548	3558	Empty	true
Exp1_01	Apolipoprotein B-100 OS=Homo sapiens GN=APOB PE=1 SV=2	APOB_HUMAN	swissprot_2012.fasta	515615	100.0%	148	192	221	1.57%	39.4%	EQHLFLPFSYK	K	N	98.6%	29.6	29.0	29.6	2.40	0	1	0	0	2	1408.73			11063	263	273	Empty	true
Exp1_01	Apolipoprotein B-100 OS=Homo sapiens GN=APOB PE=1 SV=2	APOB_HUMAN	swissprot_2012.fasta	515615	100.0%	148	192	221	1.57%	39.4%	ESQLPTVMDFR	K	K	99.7%	56.2	29.1	40.8	4.89	0	1	0	0	2	1322.64			70282	621	631	Empty	true
Exp1_01	Apolipoprotein B-100 OS=Homo sapiens GN=APOB PE=1 SV=2	APOB_HUMAN	swissprot_2012.fasta	515615	100.0%	148	192	221	1.57%	39.4%	EVYGFNPEGK	K	A	99.7%	57.4	26.6	45.2	2.32	0	1	0	0	2	1139.54			18884.2	101	110	Empty	true
Exp1_01	Apolipoprotein B-100 OS=Homo sapiens GN=APOB PE=1 SV=2	APOB_HUMAN	swissprot_2012.fasta	515615	100.0%	148	192	221	1.57%	39.4%	EYSGTIASEANTYLNSK	R	S	99.7%	89.0	29.1	89.0	6.29	0	3	0	0	2	1847.87			19551.5	3508	3524	Empty	true
Exp1_01	Apolipoprotein B-100 OS=Homo sapiens GN=APOB PE=1 SV=2	APOB_HUMAN	swissprot_2012.fasta	515615	100.0%	148	192	221	1.57%	39.4%	FIIPSPK	K	R	97.4%	40.3	28.9	18.1	0.000	0	1	0	0	2	8014870			111007	924	930	Empty	true
Exp1_01	Apolipoprotein B-100 OS=Homo sapiens GN=APOB PE=1 SV=2	APOB_HUMAN	swissprot_2012.fasta	515615	100.0%	148	192	221	1.57%	39.4%	FPEVDVLTK	K	Y	99.7%	57.1	28.4	43.5	2.05	0	1	0	0	2	1047.57			18354.1	3791	3799	Empty	true
Exp1_01	Apolipoprotein B-100 OS=Homo sapiens GN=APOB PE=1 SV=2	APOB_HUMAN	swissprot_2012.fasta	515615	100.0%	148	192	221	1.57%	39.4%	FQFPGKPGIYTR	R	E	99.0%	27.6	27.2	11.6	1.17	0	0	1	0	2	1410.75			22833.8	4202	4213	Empty	true
Exp1_01	Apolipoprotein B-100 OS=Homo sapiens GN=APOB PE=1 SV=2	APOB_HUMAN	swissprot_2012.fasta	515615	100.0%	148	192	221	1.57%	39.4%	FSVPAGIVIPSFQALTAR	K	F	99.7%	65.9	25.0	49.4	3.10	0	1	1	0	2	1874.05			126436	3869	3886	Empty	true
Exp1_01	Apolipoprotein B-100 OS=Homo sapiens GN=APOB PE=1 SV=2	APOB_HUMAN	swissprot_2012.fasta	515615	100.0%	148	192	221	1.57%	39.4%	GESKLEVLNFDFQANAQLSNPK	K	I	99.7%	54.2	30.2	41.8	2.85	0	0	1	0	2	2449.24			3915.36	2797	2818	Empty	true
Exp1_01	Apolipoprotein B-100 OS=Homo sapiens GN=APOB PE=1 SV=2	APOB_HUMAN	swissprot_2012.fasta	515615	100.0%	148	192	221	1.57%	39.4%	GFEPTLEALFGK	K	Q	99.7%	72.4	28.1	72.4	4.30	0	1	0	0	2	1308.68			80143.1	696	707	Empty	true
Exp1_01	Apolipoprotein B-100 OS=Homo sapiens GN=APOB PE=1 SV=2	APOB_HUMAN	swissprot_2012.fasta	515615	100.0%	148	192	221	1.57%	39.4%	GISTSAASPAVGTVGMDMDEDDDFSK	K	W	99.7%	83.3	25.4	83.3	7.48	0	1	0	0	2	2603.11			9306.98	3996	4021	Empty	true
Exp1_01	Apolipoprotein B-100 OS=Homo sapiens GN=APOB PE=1 SV=2	APOB_HUMAN	swissprot_2012.fasta	515615	100.0%	148	192	221	1.57%	39.4%	GMALFGEGK	K	A	95.2%	34.4	25.4	22.6	0.000	0	1	0	0	2	9094500			19148.2	3006	3014	Empty	true
Exp1_01	Apolipoprotein B-100 OS=Homo sapiens GN=APOB PE=1 SV=2	APOB_HUMAN	swissprot_2012.fasta	515615	100.0%	148	192	221	1.57%	39.4%	GNVATEISTER	K	D	99.7%	71.3	29.1	59.0	2.96	0	1	0	0	2	1176.59			23087.1	197	207	Empty	true
Exp1_01	Apolipoprotein B-100 OS=Homo sapiens GN=APOB PE=1 SV=2	APOB_HUMAN	swissprot_2012.fasta	515615	100.0%	148	192	221	1.57%	39.4%	GSTSHHLVSR	K	K	99.7%	84.3	26.7	73.5	1.66	0	1	0	0	2	1080.55			22098.1	1948	1957	Empty	true
Exp1_01	Apolipoprotein B-100 OS=Homo sapiens GN=APOB PE=1 SV=2	APOB_HUMAN	swissprot_2012.fasta	515615	100.0%	148	192	221	1.57%	39.4%	IADFELPTIIVPEQTIEIPSIK	K	F	99.7%	43.3	25.0	43.3	4.89	0	1	1	0	2	2466.37			48215.9	3847	3868	Empty	true
Exp1_01	Apolipoprotein B-100 OS=Homo sapiens GN=APOB PE=1 SV=2	APOB_HUMAN	swissprot_2012.fasta	515615	100.0%	148	192	221	1.57%	39.4%	IAELSATAQEIIK	K	S	99.7%	78.1	26.8	54.1	3.47	0	1	1	0	2	1386.78			53680.3	4466	4478	Empty	true
Exp1_01	Apolipoprotein B-100 OS=Homo sapiens GN=APOB PE=1 SV=2	APOB_HUMAN	swissprot_2012.fasta	515615	100.0%	148	192	221	1.57%	39.4%	IDDIWNLEVK	K	E	99.7%	64.9	29.5	38.9	0.000	0	1	0	0	2	1244.65			10895.4	3538	3547	Empty	true
Exp1_01	Apolipoprotein B-100 OS=Homo sapiens GN=APOB PE=1 SV=2	APOB_HUMAN	swissprot_2012.fasta	515615	100.0%	148	192	221	1.57%	39.4%	IEDGTLASK	K	T	99.7%	63.5	28.8	40.6	0.000	0	1	0	0	2	9334889			38379	3936	3944	Empty	true
Exp1_01	Apolipoprotein B-100 OS=Homo sapiens GN=APOB PE=1 SV=2	APOB_HUMAN	swissprot_2012.fasta	515615	100.0%	148	192	221	1.57%	39.4%	IEGNLIFDPNNYLPK	K	E	99.7%	44.0	29.7	44.0	3.43	0	1	0	0	2	1746.91			46074.8	655	669	Empty	true
Exp1_01	Apolipoprotein B-100 OS=Homo sapiens GN=APOB PE=1 SV=2	APOB_HUMAN	swissprot_2012.fasta	515615	100.0%	148	192	221	1.57%	39.4%	IEIPLPFGGK	K	S	99.7%	50.5	26.9	23.2	0.000	0	1	0	0	2	1070.62			67807.9	1296	1305	Empty	true
Exp1_01	Apolipoprotein B-100 OS=Homo sapiens GN=APOB PE=1 SV=2	APOB_HUMAN	swissprot_2012.fasta	515615	100.0%	148	192	221	1.57%	39.4%	IGQDGISTSATTNLK	R	C	99.7%	72.4	29.1	72.4	3.22	0	1	0	0	2	1505.78			46786.2	1647	1661	Empty	true
Exp1_01	Apolipoprotein B-100 OS=Homo sapiens GN=APOB PE=1 SV=2	APOB_HUMAN	swissprot_2012.fasta	515615	100.0%	148	192	221	1.57%	39.4%	IHSGSFQSQVELSNDQEK	R	A	99.7%	96.6	28.9	96.6	4.46	0	1	2	0	2	2032.96			124652	3639	3656	Empty	true
Exp1_01	Apolipoprotein B-100 OS=Homo sapiens GN=APOB PE=1 SV=2	APOB_HUMAN	swissprot_2012.fasta	515615	100.0%	148	192	221	1.57%	39.4%	IISDYHQQFR	K	Y	99.7%	36.1	29.6	19.5	1.16	0	1	1	0	2	1306.65			252270	4487	4496	Empty	true
Exp1_01	Apolipoprotein B-100 OS=Homo sapiens GN=APOB PE=1 SV=2	APOB_HUMAN	swissprot_2012.fasta	515615	100.0%	148	192	221	1.57%	39.4%	ILGEELGFASLHDLQLLGK	R	L	99.7%	88.9	25.2	76.9	4.15	0	1	1	0	2	2053.13			516748	779	797	Empty	true
Exp1_01	Apolipoprotein B-100 OS=Homo sapiens GN=APOB PE=1 SV=2	APOB_HUMAN	swissprot_2012.fasta	515615	100.0%	148	192	221	1.57%	39.4%	INNQLTLDSNTK	K	Y	99.7%	51.9	29.8	51.9	1.20	0	1	0	0	2	1360.71			7133.59	2877	2888	Empty	true
Exp1_01	Apolipoprotein B-100 OS=Homo sapiens GN=APOB PE=1 SV=2	APOB_HUMAN	swissprot_2012.fasta	515615	100.0%	148	192	221	1.57%	39.4%	IPSVQINFK	R	D	97.4%	26.2	26.2	14.2	1.20	0	1	0	0	2	1045.6			49885	2626	2634	Empty	true
Exp1_01	Apolipoprotein B-100 OS=Homo sapiens GN=APOB PE=1 SV=2	APOB_HUMAN	swissprot_2012.fasta	515615	100.0%	148	192	221	1.57%	39.4%	ITENDIQIALDDAK	R	I	99.7%	92.4	29.7	77.4	4.25	0	1	1	0	2	1558.8			36019.2	2151	2164	Empty	true
Exp1_01	Apolipoprotein B-100 OS=Homo sapiens GN=APOB PE=1 SV=2	APOB_HUMAN	swissprot_2012.fasta	515615	100.0%	148	192	221	1.57%	39.4%	ITLIINWLQEALSSASLAHMK	K	A	99.7%	61.3	25.8	45.1	2.96	0	0	1	0	2	2339.28			21411	2489	2509	Empty	true
Exp1_01	Apolipoprotein B-100 OS=Homo sapiens GN=APOB PE=1 SV=2	APOB_HUMAN	swissprot_2012.fasta	515615	100.0%	148	192	221	1.57%	39.4%	IVQILPWEQNEQVK	K	N	99.7%	51.8	27.0	51.8	1.77	0	1	1	0	2	1723.94			17821.3	577	590	Empty	true
Exp1_01	Apolipoprotein B-100 OS=Homo sapiens GN=APOB PE=1 SV=2	APOB_HUMAN	swissprot_2012.fasta	515615	100.0%	148	192	221	1.57%	39.4%	KGISTSAASPAVGTVGMDMDEDDDFSK	K	W	99.7%	54.8	27.7	54.8	4.68	0	0	1	0	2	2731.21			2165.32	3995	4021	Empty	true
Exp1_01	Apolipoprotein B-100 OS=Homo sapiens GN=APOB PE=1 SV=2	APOB_HUMAN	swissprot_2012.fasta	515615	100.0%	148	192	221	1.57%	39.4%	KGNVATEISTER	R	D	99.7%	56.8	29.6	56.8	4.59	0	3	0	0	2	1304.68			17120.8	196	207	Empty	true
Exp1_01	Apolipoprotein B-100 OS=Homo sapiens GN=APOB PE=1 SV=2	APOB_HUMAN	swissprot_2012.fasta	515615	100.0%	148	192	221	1.57%	39.4%	KLTISEQNIQR	K	A	99.7%	45.1	27.5	30.8	1.96	0	1	0	0	2	1329.75			11575	334	344	Empty	true
Exp1_01	Apolipoprotein B-100 OS=Homo sapiens GN=APOB PE=1 SV=2	APOB_HUMAN	swissprot_2012.fasta	515615	100.0%	148	192	221	1.57%	39.4%	KMTSNFPVDLSDYPK	K	S	99.2%	25.7	29.1	25.7	2.89	0	0	1	0	2	1741.85			20544.4	1188	1202	Empty	true
Exp1_01	Apolipoprotein B-100 OS=Homo sapiens GN=APOB PE=1 SV=2	APOB_HUMAN	swissprot_2012.fasta	515615	100.0%	148	192	221	1.57%	39.4%	KYTYNYEAESSSGVPGTADSR	R	S	99.7%	112	28.3	97.9	5.28	0	1	1	0	2	2282.02			22630.6	51	71	Empty	true
Exp1_01	Apolipoprotein B-100 OS=Homo sapiens GN=APOB PE=1 SV=2	APOB_HUMAN	swissprot_2012.fasta	515615	100.0%	148	192	221	1.57%	39.4%	LAAYLMLMR	R	S	99.7%	72.1	26.1	72.1	2.59	0	1	0	0	2	1081.59			110804	559	567	Empty	true
Exp1_01	Apolipoprotein B-100 OS=Homo sapiens GN=APOB PE=1 SV=2	APOB_HUMAN	swissprot_2012.fasta	515615	100.0%	148	192	221	1.57%	39.4%	LALWGEHTGQLYSK	K	F	99.7%	38.0	29.9	38.0	3.15	0	1	0	0	2	1602.83			10621.6	1917	1930	Empty	true
Exp1_01	Apolipoprotein B-100 OS=Homo sapiens GN=APOB PE=1 SV=2	APOB_HUMAN	swissprot_2012.fasta	515615	100.0%	148	192	221	1.57%	39.4%	LAPGELTIIL	K	-	99.7%	57.0	25.0	57.0	0.000	0	1	0	0	2	1039.64			6401.84	4554	4563	Empty	true
Exp1_01	Apolipoprotein B-100 OS=Homo sapiens GN=APOB PE=1 SV=2	APOB_HUMAN	swissprot_2012.fasta	515615	100.0%	148	192	221	1.57%	39.4%	LATALSLSNK	K	F	99.7%	57.3	25.1	57.3	2.32	0	1	0	0	2	1017.59			16410.4	3395	3404	Empty	true
Exp1_01	Apolipoprotein B-100 OS=Homo sapiens GN=APOB PE=1 SV=2	APOB_HUMAN	swissprot_2012.fasta	515615	100.0%	148	192	221	1.57%	39.4%	LDFSSQADLR	K	N	99.7%	67.4	28.3	42.8	1.52	0	1	0	0	2	1151.57			59891.7	2898	2907	Empty	true
Exp1_01	Apolipoprotein B-100 OS=Homo sapiens GN=APOB PE=1 SV=2	APOB_HUMAN	swissprot_2012.fasta	515615	100.0%	148	192	221	1.57%	39.4%	LDFSSQADLRNEIK	K	T	99.7%	34.5	29.9	15.7	1.66	0	0	1	0	2	1635.83			45840.3	2898	2911	Empty	true
Exp1_01	Apolipoprotein B-100 OS=Homo sapiens GN=APOB PE=1 SV=2	APOB_HUMAN	swissprot_2012.fasta	515615	100.0%	148	192	221	1.57%	39.4%	LDNIYSSDK	K	F	99.5%	45.1	26.7	45.1	0.000	0	1	0	0	2	1054.51			11244.6	1770	1778	Empty	true
Exp1_01	Apolipoprotein B-100 OS=Homo sapiens GN=APOB PE=1 SV=2	APOB_HUMAN	swissprot_2012.fasta	515615	100.0%	148	192	221	1.57%	39.4%	LDNIYSSDKFYK	K	Q	99.7%	41.4	29.7	24.1	4.12	0	0	1	0	2	1492.73			64829.3	1770	1781	Empty	true
Exp1_01	Apolipoprotein B-100 OS=Homo sapiens GN=APOB PE=1 SV=2	APOB_HUMAN	swissprot_2012.fasta	515615	100.0%	148	192	221	1.57%	39.4%	LDVTTSIGR	K	R	99.7%	54.5	27.6	32.7	1.70	0	1	0	0	2	9615314			79599.9	3690	3698	Empty	true
Exp1_01	Apolipoprotein B-100 OS=Homo sapiens GN=APOB PE=1 SV=2	APOB_HUMAN	swissprot_2012.fasta	515615	100.0%	148	192	221	1.57%	39.4%	LEIQSQVDSQHVGHSVLTAK	K	G	99.7%	56.9	29.2	42.0	1.74	0	0	1	0	2	2176.14			22035.6	2986	3005	Empty	true
Exp1_01	Apolipoprotein B-100 OS=Homo sapiens GN=APOB PE=1 SV=2	APOB_HUMAN	swissprot_2012.fasta	515615	100.0%	148	192	221	1.57%	39.4%	LELELRPTGEIEQYSVSATYELQR	R	E	99.7%	45.8	29.3	31.2	2.92	0	0	1	0	2	2824.44			23554.7	1001	1024	Empty	true
Exp1_01	Apolipoprotein B-100 OS=Homo sapiens GN=APOB PE=1 SV=2	APOB_HUMAN	swissprot_2012.fasta	515615	100.0%	148	192	221	1.57%	39.4%	LHVAGNLK	K	G	94.9%	33.7	25.0	20.1	0.000	0	1	0	0	2	8515098			43809.4	1821	1828	Empty	true
Exp1_01	Apolipoprotein B-100 OS=Homo sapiens GN=APOB PE=1 SV=2	APOB_HUMAN	swissprot_2012.fasta	515615	100.0%	148	192	221	1.57%	39.4%	LIDVISMYR	K	E	99.7%	46.0	26.9	31.5	2.60	0	1	0	0	2	1109.6			7065.9	4262	4270	Empty	true
Exp1_01	Apolipoprotein B-100 OS=Homo sapiens GN=APOB PE=1 SV=2	APOB_HUMAN	swissprot_2012.fasta	515615	100.0%	148	192	221	1.57%	39.4%	LIVAMSSWLQK	K	A	99.7%	70.5	26.9	56.3	2.24	0	1	0	0	2	1275.71			52347	1230	1240	Empty	true
Exp1_01	Apolipoprotein B-100 OS=Homo sapiens GN=APOB PE=1 SV=2	APOB_HUMAN	swissprot_2012.fasta	515615	100.0%	148	192	221	1.57%	39.4%	LKTQFNNNEYSQDLDAYNTK	K	D	99.7%	42.0	29.5	42.0	2.26	0	0	1	0	2	2406.12			2763.54	1983	2002	Empty	true
Exp1_01	Apolipoprotein B-100 OS=Homo sapiens GN=APOB PE=1 SV=2	APOB_HUMAN	swissprot_2012.fasta	515615	100.0%	148	192	221	1.57%	39.4%	LLSGGNTLHLVSTTK	K	T	99.7%	74.9	27.4	74.9	2.89	0	1	1	0	2	1541.85			26569.3	935	949	Empty	true
Exp1_01	Apolipoprotein B-100 OS=Homo sapiens GN=APOB PE=1 SV=2	APOB_HUMAN	swissprot_2012.fasta	515615	100.0%	148	192	221	1.57%	39.4%	LNELSFK	K	T	99.7%	39.2	25.9	11.6	1.85	0	1	0	0	2	8504669			5207.62	2404	2410	Empty	true
Exp1_01	Apolipoprotein B-100 OS=Homo sapiens GN=APOB PE=1 SV=2	APOB_HUMAN	swissprot_2012.fasta	515615	100.0%	148	192	221	1.57%	39.4%	LNGEIQALELPQK	R	A	99.7%	65.8	25.3	53.6	1.85	0	1	0	0	2	1452.81			8044.94	2450	2462	Empty	true
Exp1_01	Apolipoprotein B-100 OS=Homo sapiens GN=APOB PE=1 SV=2	APOB_HUMAN	swissprot_2012.fasta	515615	100.0%	148	192	221	1.57%	39.4%	LNTDIAGLASAIDMSTNYNSDSLHFSNVFR	R	S	99.7%	82.9	30.0	82.9	6.85	0	0	1	0	2	3273.55			1619.67	1868	1897	Empty	true
Exp1_01	Apolipoprotein B-100 OS=Homo sapiens GN=APOB PE=1 SV=2	APOB_HUMAN	swissprot_2012.fasta	515615	100.0%	148	192	221	1.57%	39.4%	LPQQANDYLNSFNWER	K	Q	99.7%	107	29.1	107	2.24	0	1	0	0	2	1994.94			60577.6	2118	2133	Empty	true
Exp1_01	Apolipoprotein B-100 OS=Homo sapiens GN=APOB PE=1 SV=2	APOB_HUMAN	swissprot_2012.fasta	515615	100.0%	148	192	221	1.57%	39.4%	LPYTIITTPPLK	R	D	99.7%	47.1	25.0	35.1	2.42	0	1	0	0	2	1356.81			21988	3137	3148	Empty	true
Exp1_01	Apolipoprotein B-100 OS=Homo sapiens GN=APOB PE=1 SV=2	APOB_HUMAN	swissprot_2012.fasta	515615	100.0%	148	192	221	1.57%	39.4%	LPYTIITTPPLKDFSLWEK	R	T	99.7%	56.4	25.6	56.4	0.000	0	0	1	0	2	2262.24			250098	3137	3155	Empty	true
Exp1_01	Apolipoprotein B-100 OS=Homo sapiens GN=APOB PE=1 SV=2	APOB_HUMAN	swissprot_2012.fasta	515615	100.0%	148	192	221	1.57%	39.4%	LRLEPLK	K	L	97.8%	37.1	25.0	13.7	0.000	0	1	0	0	2	8685616			29635.1	1814	1820	Empty	true
Exp1_01	Apolipoprotein B-100 OS=Homo sapiens GN=APOB PE=1 SV=2	APOB_HUMAN	swissprot_2012.fasta	515615	100.0%	148	192	221	1.57%	39.4%	LSLESLTSYFSIESSTK	K	G	99.7%	76.9	30.2	76.9	2.74	0	1	0	0	2	1891.95			1370.21	3481	3497	Empty	true
Exp1_01	Apolipoprotein B-100 OS=Homo sapiens GN=APOB PE=1 SV=2	APOB_HUMAN	swissprot_2012.fasta	515615	100.0%	148	192	221	1.57%	39.4%	LTISEQNIQR	K	A	99.7%	69.8	28.4	56.9	2.52	0	2	0	0	2	1201.65			17803.8	335	344	Empty	true
Exp1_01	Apolipoprotein B-100 OS=Homo sapiens GN=APOB PE=1 SV=2	APOB_HUMAN	swissprot_2012.fasta	515615	100.0%	148	192	221	1.57%	39.4%	LTLDIQNK	R	K	99.7%	48.6	28.1	30.9	1.77	0	1	0	0	2	9445413			32011.3	1092	1099	Empty	true
Exp1_01	Apolipoprotein B-100 OS=Homo sapiens GN=APOB PE=1 SV=2	APOB_HUMAN	swissprot_2012.fasta	515615	100.0%	148	192	221	1.57%	39.4%	LVELAHQYK	K	L	99.7%	46.8	29.2	25.5	2.04	0	1	0	0	2	1100.61			8358.87	2361	2369	Empty	true
Exp1_01	Apolipoprotein B-100 OS=Homo sapiens GN=APOB PE=1 SV=2	APOB_HUMAN	swissprot_2012.fasta	515615	100.0%	148	192	221	1.57%	39.4%	MGLAFESTK	K	S	99.7%	52.9	26.6	52.9	1.74	0	1	0	0	2	9834867			35261.4	306	314	Empty	true
Exp1_01	Apolipoprotein B-100 OS=Homo sapiens GN=APOB PE=1 SV=2	APOB_HUMAN	swissprot_2012.fasta	515615	100.0%	148	192	221	1.57%	39.4%	MNFKQELNGNTK	R	S	99.7%	40.8	29.3	40.8	1.55	0	1	0	0	2	1423.7			4247.45	3438	3449	Empty	true
Exp1_01	Apolipoprotein B-100 OS=Homo sapiens GN=APOB PE=1 SV=2	APOB_HUMAN	swissprot_2012.fasta	515615	100.0%	148	192	221	1.57%	39.4%	MTSNFPVDLSDYPK	K	S	99.7%	68.5	28.6	68.5	6.82	0	1	0	0	2	1613.75			12195.5	1189	1202	Empty	true
Exp1_01	Apolipoprotein B-100 OS=Homo sapiens GN=APOB PE=1 SV=2	APOB_HUMAN	swissprot_2012.fasta	515615	100.0%	148	192	221	1.57%	39.4%	MYQMDIQQELQR	R	Y	99.7%	66.9	28.7	43.9	4.77	0	1	0	0	2	1582.74			7939.74	2523	2534	Empty	true
Exp1_01	Apolipoprotein B-100 OS=Homo sapiens GN=APOB PE=1 SV=2	APOB_HUMAN	swissprot_2012.fasta	515615	100.0%	148	192	221	1.57%	39.4%	NFVASHIANILNSEELDIQDLK	K	K	99.7%	96.3	29.4	65.2	3.26	0	0	1	0	2	2483.28			33541.9	591	612	Empty	true
Exp1_01	Apolipoprotein B-100 OS=Homo sapiens GN=APOB PE=1 SV=2	APOB_HUMAN	swissprot_2012.fasta	515615	100.0%	148	192	221	1.57%	39.4%	NFVASHIANILNSEELDIQDLKK	K	L	99.7%	86.1	28.2	86.1	6.77	0	0	1	2	2	2611.37			676193	591	613	Empty	true
Exp1_01	Apolipoprotein B-100 OS=Homo sapiens GN=APOB PE=1 SV=2	APOB_HUMAN	swissprot_2012.fasta	515615	100.0%	148	192	221	1.57%	39.4%	NHLQLEGLFFTNGEHTSK	K	A	99.7%	48.2	29.9	27.6	3.28	0	0	2	2	2	2072.02			280395	3569	3586	Empty	true
Exp1_01	Apolipoprotein B-100 OS=Homo sapiens GN=APOB PE=1 SV=2	APOB_HUMAN	swissprot_2012.fasta	515615	100.0%	148	192	221	1.57%	39.4%	NLQNNAEWVYQGAIR	R	Q	99.7%	93.5	30.2	79.8	4.82	0	1	0	0	2	1775.88			10462	4107	4121	Empty	true
Exp1_01	Apolipoprotein B-100 OS=Homo sapiens GN=APOB PE=1 SV=2	APOB_HUMAN	swissprot_2012.fasta	515615	100.0%	148	192	221	1.57%	39.4%	NMEVSVATTTK	K	A	99.7%	71.3	28.3	47.8	3.59	0	2	0	0	2	1180.59			121259	3420	3430	Empty	true
Exp1_01	Apolipoprotein B-100 OS=Homo sapiens GN=APOB PE=1 SV=2	APOB_HUMAN	swissprot_2012.fasta	515615	100.0%	148	192	221	1.57%	39.4%	NNALDFVTK	R	S	99.7%	38.1	28.5	38.1	2.52	0	1	0	0	2	1021.53			50149.6	3213	3221	Empty	true
Exp1_01	Apolipoprotein B-100 OS=Homo sapiens GN=APOB PE=1 SV=2	APOB_HUMAN	swissprot_2012.fasta	515615	100.0%	148	192	221	1.57%	39.4%	NPNGYSFSIPVK	K	V	99.7%	80.3	28.8	67.9	4.55	0	3	0	0	2	1322.67			62999.7	3713	3724	Empty	true
Exp1_01	Apolipoprotein B-100 OS=Homo sapiens GN=APOB PE=1 SV=2	APOB_HUMAN	swissprot_2012.fasta	515615	100.0%	148	192	221	1.57%	39.4%	NSEEFAAAMSR	K	Y	99.7%	77.1	25.0	77.1	3.48	0	2	0	0	2	1212.53			128284	118	128	Empty	true
Exp1_01	Apolipoprotein B-100 OS=Homo sapiens GN=APOB PE=1 SV=2	APOB_HUMAN	swissprot_2012.fasta	515615	100.0%	148	192	221	1.57%	39.4%	NTLELSNGVIVK	K	I	99.7%	82.2	27.1	64.3	4.17	0	2	0	0	2	1286.73			98898.4	2865	2876	Empty	true
Exp1_01	Apolipoprotein B-100 OS=Homo sapiens GN=APOB PE=1 SV=2	APOB_HUMAN	swissprot_2012.fasta	515615	100.0%	148	192	221	1.57%	39.4%	QGFFPDSVNK	K	A	99.7%	40.2	27.9	20.8	2.00	0	1	0	0	2	1138.55			47703.5	708	717	Empty	true
Exp1_01	Apolipoprotein B-100 OS=Homo sapiens GN=APOB PE=1 SV=2	APOB_HUMAN	swissprot_2012.fasta	515615	100.0%	148	192	221	1.57%	39.4%	QIDDIDVR	R	F	98.8%	43.0	28.2	20.1	0.000	0	1	0	0	2	9734951			145419	4122	4129	Empty	true
Exp1_01	Apolipoprotein B-100 OS=Homo sapiens GN=APOB PE=1 SV=2	APOB_HUMAN	swissprot_2012.fasta	515615	100.0%	148	192	221	1.57%	39.4%	QSFDLSVK	K	A	98.6%	39.2	25.3	27.4	0.000	0	1	0	0	2	9234833			32060.4	3167	3174	Empty	true
Exp1_01	Apolipoprotein B-100 OS=Homo sapiens GN=APOB PE=1 SV=2	APOB_HUMAN	swissprot_2012.fasta	515615	100.0%	148	192	221	1.57%	39.4%	QTIIVVLENVQR	R	N	99.7%	58.1	25.0	58.1	1.35	0	1	1	0	2	1411.83			8127.88	2086	2097	Empty	true
Exp1_01	Apolipoprotein B-100 OS=Homo sapiens GN=APOB PE=1 SV=2	APOB_HUMAN	swissprot_2012.fasta	515615	100.0%	148	192	221	1.57%	39.4%	QVFLYPEKDEPTYILNIK	K	R	99.7%	88.0	27.9	72.5	1.37	0	0	1	0	2	2210.17			249748	140	157	Empty	true
Exp1_01	Apolipoprotein B-100 OS=Homo sapiens GN=APOB PE=1 SV=2	APOB_HUMAN	swissprot_2012.fasta	515615	100.0%	148	192	221	1.57%	39.4%	RNLQNNAEWVYQGAIR	R	Q	99.7%	52.5	29.9	37.9	3.80	0	0	1	0	2	1931.98			58008.7	4106	4121	Empty	true
Exp1_01	Apolipoprotein B-100 OS=Homo sapiens GN=APOB PE=1 SV=2	APOB_HUMAN	swissprot_2012.fasta	515615	100.0%	148	192	221	1.57%	39.4%	SEILAHWSPAK	R	L	99.7%	69.9	27.4	69.9	5.46	0	1	0	0	2	1238.65			27269.1	1135	1145	Empty	true
Exp1_01	Apolipoprotein B-100 OS=Homo sapiens GN=APOB PE=1 SV=2	APOB_HUMAN	swissprot_2012.fasta	515615	100.0%	148	192	221	1.57%	39.4%	SEYQADYESLR	R	F	99.7%	41.4	25.0	41.4	2.70	0	1	0	0	2	1360.6			30297.8	1600	1610	Empty	true
Exp1_01	Apolipoprotein B-100 OS=Homo sapiens GN=APOB PE=1 SV=2	APOB_HUMAN	swissprot_2012.fasta	515615	100.0%	148	192	221	1.57%	39.4%	SGVQMNTNFFHESGLEAHVALK	R	A	99.7%	67.2	30.1	55.9	1.48	0	0	1	2	2	2416.17			162369	897	918	Empty	true
Exp1_01	Apolipoprotein B-100 OS=Homo sapiens GN=APOB PE=1 SV=2	APOB_HUMAN	swissprot_2012.fasta	515615	100.0%	148	192	221	1.57%	39.4%	SISAALEHK	K	V	99.7%	40.4	25.3	40.4	4.92	0	1	0	0	2	9555207			33628.9	1959	1967	Empty	true
Exp1_01	Apolipoprotein B-100 OS=Homo sapiens GN=APOB PE=1 SV=2	APOB_HUMAN	swissprot_2012.fasta	515615	100.0%	148	192	221	1.57%	39.4%	SKPTVSSSMEFK	K	Y	99.7%	51.2	27.9	51.2	2.19	0	1	0	0	2	1327.66			2588.12	3450	3461	Empty	true
Exp1_01	Apolipoprotein B-100 OS=Homo sapiens GN=APOB PE=1 SV=2	APOB_HUMAN	swissprot_2012.fasta	515615	100.0%	148	192	221	1.57%	39.4%	SLWDFLK	K	L	99.7%	34.9	27.1	19.0	1.80	0	1	0	0	2	9084877			71435.7	3683	3689	Empty	true
Exp1_01	Apolipoprotein B-100 OS=Homo sapiens GN=APOB PE=1 SV=2	APOB_HUMAN	swissprot_2012.fasta	515615	100.0%	148	192	221	1.57%	39.4%	SPAFTDLHLR	K	Y	99.7%	76.9	28.1	62.3	4.59	0	1	0	0	2	1156.61			92437.5	3980	3989	Empty	true
Exp1_01	Apolipoprotein B-100 OS=Homo sapiens GN=APOB PE=1 SV=2	APOB_HUMAN	swissprot_2012.fasta	515615	100.0%	148	192	221	1.57%	39.4%	SPSQADINK	R	I	99.7%	60.1	27.1	45.4	2.22	0	1	0	0	2	9594793			7591.11	568	576	Empty	true
Exp1_01	Apolipoprotein B-100 OS=Homo sapiens GN=APOB PE=1 SV=2	APOB_HUMAN	swissprot_2012.fasta	515615	100.0%	148	192	221	1.57%	39.4%	SVGFHLPSR	K	E	99.7%	37.6	27.3	23.5	4.30	0	1	0	0	2	9995370			20740.2	1325	1333	Empty	true
Exp1_01	Apolipoprotein B-100 OS=Homo sapiens GN=APOB PE=1 SV=2	APOB_HUMAN	swissprot_2012.fasta	515615	100.0%	148	192	221	1.57%	39.4%	SVMAPFTMTIDAHTNGNGK	R	L	99.7%	44.4	28.4	44.4	1.21	0	0	2	0	2	1993.9			88086.7	1898	1916	Empty	true
Exp1_01	Apolipoprotein B-100 OS=Homo sapiens GN=APOB PE=1 SV=2	APOB_HUMAN	swissprot_2012.fasta	515615	100.0%	148	192	221	1.57%	39.4%	SVSDGIAALDLNAVANK	K	I	99.7%	91.7	29.7	78.3	5.68	0	1	1	0	2	1657.88			108408	3830	3846	Empty	true
Exp1_01	Apolipoprotein B-100 OS=Homo sapiens GN=APOB PE=1 SV=2	APOB_HUMAN	swissprot_2012.fasta	515615	100.0%	148	192	221	1.57%	39.4%	SVSLPSLDPASAK	K	I	99.7%	62.5	28.7	50.6	3.92	0	2	0	0	2	1271.68			136303	642	654	Empty	true
Exp1_01	Apolipoprotein B-100 OS=Homo sapiens GN=APOB PE=1 SV=2	APOB_HUMAN	swissprot_2012.fasta	515615	100.0%	148	192	221	1.57%	39.4%	TEHGSEMLFFGNAIEGK	R	S	99.7%	85.3	28.9	73.4	8.38	0	1	1	0	2	1866.87			52466.6	2837	2853	Empty	true
Exp1_01	Apolipoprotein B-100 OS=Homo sapiens GN=APOB PE=1 SV=2	APOB_HUMAN	swissprot_2012.fasta	515615	100.0%	148	192	221	1.57%	39.4%	TEVIPPLIENR	K	Q	99.7%	62.5	25.0	37.6	2.64	0	2	1	0	2	1280.72			240895	950	960	Empty	true
Exp1_01	Apolipoprotein B-100 OS=Homo sapiens GN=APOB PE=1 SV=2	APOB_HUMAN	swissprot_2012.fasta	515615	100.0%	148	192	221	1.57%	39.4%	TGISPLALIK	R	G	99.7%	80.0	25.0	62.1	4.55	0	3	0	0	2	1012.64			130021	220	229	Empty	true
Exp1_01	Apolipoprotein B-100 OS=Homo sapiens GN=APOB PE=1 SV=2	APOB_HUMAN	swissprot_2012.fasta	515615	100.0%	148	192	221	1.57%	39.4%	TILGTMPAFEVSLQALQK	K	A	99.7%	87.9	27.3	87.9	7.40	0	1	0	0	2	1947.06			26526.6	2592	2609	Empty	true
Exp1_01	Apolipoprotein B-100 OS=Homo sapiens GN=APOB PE=1 SV=2	APOB_HUMAN	swissprot_2012.fasta	515615	100.0%	148	192	221	1.57%	39.4%	TKNSEEFAAAMSR	K	Y	99.7%	65.7	27.6	55.5	1.72	0	1	1	0	2	1441.67			15002.2	116	128	Empty	true
Exp1_01	Apolipoprotein B-100 OS=Homo sapiens GN=APOB PE=1 SV=2	APOB_HUMAN	swissprot_2012.fasta	515615	100.0%	148	192	221	1.57%	39.4%	TLADLTLLDSPIKVPLLLSEPINIIDALEMR	R	D	99.7%	47.5	25.0	47.5	5.96	0	0	1	0	2	3416.93			2257.72	2013	2043	Empty	true
Exp1_01	Apolipoprotein B-100 OS=Homo sapiens GN=APOB PE=1 SV=2	APOB_HUMAN	swissprot_2012.fasta	515615	100.0%	148	192	221	1.57%	39.4%	TLQELKK	K	L	99.3%	41.7	25.0	4.58	0.000	0	1	0	0	2	8595249			47270.3	328	334	Empty	true
Exp1_01	Apolipoprotein B-100 OS=Homo sapiens GN=APOB PE=1 SV=2	APOB_HUMAN	swissprot_2012.fasta	515615	100.0%	148	192	221	1.57%	39.4%	TLQGIPQMIGEVIRK	R	G	99.7%	29.0	25.0	29.0	1.22	0	0	1	0	2	1682.96			57230.3	805	819	Empty	true
Exp1_01	Apolipoprotein B-100 OS=Homo sapiens GN=APOB PE=1 SV=2	APOB_HUMAN	swissprot_2012.fasta	515615	100.0%	148	192	221	1.57%	39.4%	TPALHFK	R	S	99.7%	41.5	25.1	41.5	2.03	0	1	0	0	2	8134618			59663.8	1318	1324	Empty	true
Exp1_01	Apolipoprotein B-100 OS=Homo sapiens GN=APOB PE=1 SV=2	APOB_HUMAN	swissprot_2012.fasta	515615	100.0%	148	192	221	1.57%	39.4%	TQFNNNEYSQDLDAYNTK	K	D	99.7%	101	26.2	101	8.09	0	1	0	0	2	2164.94			10408.6	1985	2002	Empty	true
Exp1_01	Apolipoprotein B-100 OS=Homo sapiens GN=APOB PE=1 SV=2	APOB_HUMAN	swissprot_2012.fasta	515615	100.0%	148	192	221	1.57%	39.4%	TQFNNNEYSQDLDAYNTKDK	K	I	99.7%	38.6	27.0	20.1	2.38	0	0	1	0	2	2408.06			5410	1985	2004	Empty	true
Exp1_01	Apolipoprotein B-100 OS=Homo sapiens GN=APOB PE=1 SV=2	APOB_HUMAN	swissprot_2012.fasta	515615	100.0%	148	192	221	1.57%	39.4%	TSSFALNLPTLPEVK	R	F	99.7%	66.2	27.8	55.2	6.03	0	1	0	0	2	1616.89			74407.1	3776	3790	Empty	true
Exp1_01	Apolipoprotein B-100 OS=Homo sapiens GN=APOB PE=1 SV=2	APOB_HUMAN	swissprot_2012.fasta	515615	100.0%	148	192	221	1.57%	39.4%	TSSFALNLPTLPEVKFPEVDVLTK	R	Y	99.7%	49.7	25.0	49.7	2.80	0	0	1	0	2	2645.44			1616.12	3776	3799	Empty	true
Exp1_01	Apolipoprotein B-100 OS=Homo sapiens GN=APOB PE=1 SV=2	APOB_HUMAN	swissprot_2012.fasta	515615	100.0%	148	192	221	1.57%	39.4%	TTLTAFGFASADLIEIGLEGK	K	G	99.7%	34.2	27.8	34.2	4.24	0	0	1	0	2	2154.13			10335.8	675	695	Empty	true
Exp1_01	Apolipoprotein B-100 OS=Homo sapiens GN=APOB PE=1 SV=2	APOB_HUMAN	swissprot_2012.fasta	515615	100.0%	148	192	221	1.57%	39.4%	VHANPLLIDVVTYLVALIPEPSAQQLR	R	E	99.7%	48.2	25.0	48.2	3.35	0	0	0	1	2	2969.68			5643.96	401	427	Empty	true
Exp1_01	Apolipoprotein B-100 OS=Homo sapiens GN=APOB PE=1 SV=2	APOB_HUMAN	swissprot_2012.fasta	515615	100.0%	148	192	221	1.57%	39.4%	VIGNMGQTMEQLTPELK	R	S	99.7%	89.9	30.1	71.5	4.82	0	2	2	0	2	1888.95			28890.8	491	507	Empty	true
[truncated: 15,740 more rows]
